# Supplementary material for: A Prognostic Prediction Model Developed Based on Four CpG Sites and Weighted Correlation Network Analysis Identified DNAJB1 as a Novel Biomarker for Pancreatic Cancer
Source: Front Oncol. 2020 Aug 25;10:1716. doi: 10.3389/fonc.2020.01716 (PMC7477361; doi:10.3389/fonc.2020.01716)
Supplement: Supplementary file 2 [file Data_Sheet_2.xlsx]

## Sheet: Table 1
submitter_id.samples	adenocarcinoma_invasion	age_at_initial_pathologic_diagnosis	alcoholic_exposure_category	amount_of_alcohol_consumption_per_day	anatomic_neoplasm_subdivision_other	batch_number	bcr	bcr_followup_barcode	bcr_followup_uuid	submitter_id	day_of_dcc_upload	day_of_form_completion	days_to_diabetes_onset	days_to_initial_pathologic_diagnosis	days_to_pancreatitis_onset	family_history_of_cancer	file_uuid	followup_case_report_form_submission_reason	followup_treatment_success	frequency_of_alcohol_consumption	histologic_grading_tier_category	histological_type_other	history_of_chronic_pancreatitis	history_of_diabetes	history_of_neoadjuvant_treatment	history_prior_surgery_type_other	informed_consent_verified	init_pathology_dx_method_other	initial_pathologic_diagnosis_method	lost_follow_up	lymph_node_examined_count	maximum_tumor_dimension	month_of_dcc_upload	month_of_form_completion	neoplasm_histologic_grade	number_of_lymphnodes_positive_by_he	number_of_lymphnodes_positive_by_ihc	number_pack_years_smoked	other_dx	pathologic_M	pathologic_N	pathologic_T	patient_death_reason	patient_id	person_neoplasm_cancer_status	postoperative_rx_tx	primary_lymph_node_presentation_assessment	primary_therapy_outcome_success	radiation_therapy
TCGA-2J-AABA-01A	YES	55				424.46.0	Nationwide Children's Hospital	TCGA-2J-AABA-F62440	BCF34D68-2B8F-4DE0-8349-435850881A98	TCGA-2J-AABA	22	16		0	-18029		44285DA7-3745-4A78-808D-CC4CF6243812	Scheduled Follow-up Submission			Four Tier		YES	NO	No		YES		Tumor resection	NO	22	4.3	12	7	G2	2	0	51	No	M0	N1	T3	Pancreatic Cancer	AABA	WITH TUMOR	YES	YES	Progressive Disease	NO
TCGA-IB-7891-01A	YES	49	Social Drinker			210.65.0	Nationwide Children's Hospital	TCGA-IB-7891-F43061	C7C57307-E295-4F37-A0FA-9E690A0A9F27	TCGA-IB-7891	22	9		0		YES	31DBFC07-F7F8-4059-8F41-AC46C5D53A78	Scheduled Follow-up Submission	Stable Disease				NO	NO	No		YES		Cytology (e.g. Peritoneal or pleural fluid)	NO	11	2.3	12	5	G1	7		29	No	M0	N1	T3		7891	WITH TUMOR	YES	YES		NO
TCGA-3A-A9J0-01A	YES	75				424.46.0	Nationwide Children's Hospital	TCGA-3A-A9J0-F69137	EDC8578B-350D-471D-BF62-89A9CD1B8B1D	TCGA-3A-A9J0	22	29		0		NO	99226663-C6AF-4BA7-AFFE-32113B87675C	Scheduled Follow-up Submission			Four Tier		NO	NO	No		YES		Tissue Biopsy	NO	14	4	12	12	G2	5	0		No	MX	N1	T3		A9J0	WITH TUMOR	YES	YES		NO
TCGA-HZ-7920-01A	YES	71				210.65.0	Nationwide Children's Hospital	TCGA-HZ-7920-F64070	C69737DE-EE71-44FB-B551-7A799B0BD4F5	TCGA-HZ-7920	22	25		0			565A4D4A-E3DA-493A-BA08-9AB39B895147	Scheduled Follow-up Submission	Complete Remission/Response						No		YES		Tumor resection	NO	12	3.2	12	8	G2	0			No	MX	N0	T2	Other, non-malignant disease	7920	TUMOR FREE	YES	YES	Complete Remission/Response	YES
TCGA-IB-7645-01A	YES	44				210.65.0	Nationwide Children's Hospital	TCGA-IB-7645-F43014	C67D8781-A59D-43E7-8663-2905B8B409D3	TCGA-IB-7645	22	8		0		NO	937C25B2-1022-41E5-B39A-7837936115DD	Scheduled Follow-up Submission					NO	NO	No		YES		Tumor resection	NO	17	4.5	12	5	G1	5			No	M0	N1	T3	Pancreatic Cancer	7645	WITH TUMOR	YES	YES	Progressive Disease	NO
TCGA-IB-AAUV-01A	YES	49	None			392.50.0	Nationwide Children's Hospital	TCGA-IB-AAUV-F65791	D80739A2-5604-4771-A87A-C82DE7E9AA48	TCGA-IB-AAUV	22	30		0		NO	C5186683-77AD-4B93-8EAD-B38B68BE9FD0	Scheduled Follow-up Submission	Complete Remission/Response				NO	NO	No		YES		Cytology (e.g. Peritoneal or pleural fluid)	NO	15	4.8	12	9	G2	3		50	No	M0	N1	T3		AAUV		YES	YES	Complete Remission/Response	NO
TCGA-FZ-5926-01A	YES	73				106.63.0	Nationwide Children's Hospital	TCGA-FZ-5926-F49538	817CD9FA-F5B2-4E79-9E3A-5B4D436A5EE5	TCGA-FZ-5926	22	3		0			12F3820B-F7F4-45F2-ADB1-3F2DB9D4EDE7	Scheduled Follow-up Submission	Progressive Disease						No		YES		Cytology (e.g. Peritoneal or pleural fluid)	NO	18	1.5	12	10	G2	8			No	M0	N1	T3		5926	WITH TUMOR	NO	YES	Progressive Disease	NO
TCGA-FZ-5926-11A	YES	73				106.63.0	Nationwide Children's Hospital	TCGA-FZ-5926-F49538	817CD9FA-F5B2-4E79-9E3A-5B4D436A5EE5	TCGA-FZ-5926	22	3		0			12F3820B-F7F4-45F2-ADB1-3F2DB9D4EDE7	Scheduled Follow-up Submission	Progressive Disease						No		YES		Cytology (e.g. Peritoneal or pleural fluid)	NO	18	1.5	12	10	G2	8			No	M0	N1	T3		5926	WITH TUMOR	NO	YES	Progressive Disease	NO
TCGA-HV-A5A5-01A	YES	61				284.63.0	Nationwide Children's Hospital			TCGA-HV-A5A5	22			0			A0DC94DF-771D-4A63-B5BC-B40225FA728C				Three Tier		NO	NO	No	Radical聽pancreaticoduodenectomy	YES		Tumor resection		19		12		G2	2			No	M0	N1	T3		A5A5			YES
TCGA-IB-A6UG-01A	YES	65	None			349.58.0	Nationwide Children's Hospital	TCGA-IB-A6UG-F64549	0CE87B0D-1DB1-482A-94DD-E8CCBD7E88D9	TCGA-IB-A6UG	22	4		0			4E7D07F4-06BA-4092-8D1E-88B12CB2C83A	Scheduled Follow-up Submission			Four Tier		NO	NO	No		YES		Tissue Biopsy	NO	19	3	12	9	G3	16		33.75	No	M0	N1	T3	Other, non-malignant disease	A6UG	WITH TUMOR	NO	YES	Partial Remission/Response	NO
TCGA-F2-A7TX-01A	YES	77	Daily Drinker	2		392.50.0	Nationwide Children's Hospital			TCGA-F2-A7TX	22			0		YES	40B4A0D7-5B57-4A61-B893-4F3FCEAED7EC			7			NO	YES	No		YES		Cytology (e.g. Peritoneal or pleural fluid)		19	3.6	12		G3	7			No	M0	N1	T3		A7TX			YES
TCGA-FZ-5922-01A	YES	81				106.63.0	Nationwide Children's Hospital	TCGA-FZ-5922-F49525	A1CA585C-496F-4EAC-AA90-2841060680A4	TCGA-FZ-5922	22	3		0			481BCF1A-09A4-4959-B1EC-78C2F70DF570	Scheduled Follow-up Submission					NO	NO	No		YES		Cytology (e.g. Peritoneal or pleural fluid)	NO	5	1.8	12	10	G2	0			No	M0	N0	T3		5922	WITH TUMOR	YES	YES	Progressive Disease	NO
TCGA-FZ-5922-11A	YES	81				106.63.0	Nationwide Children's Hospital	TCGA-FZ-5922-F49525	A1CA585C-496F-4EAC-AA90-2841060680A4	TCGA-FZ-5922	22	3		0			481BCF1A-09A4-4959-B1EC-78C2F70DF570	Scheduled Follow-up Submission					NO	NO	No		YES		Cytology (e.g. Peritoneal or pleural fluid)	NO	5	1.8	12	10	G2	0			No	M0	N0	T3		5922	WITH TUMOR	YES	YES	Progressive Disease	NO
TCGA-3A-A9I9-01A	YES	67	Weekly Drinker	2		392.50.0	Nationwide Children's Hospital			TCGA-3A-A9I9	22			0		YES	565A7337-4A64-442C-BA0E-20E44B341783			1			NO	NO	No		YES		Tissue Biopsy		23	2.5	12		G2	0	0	75	No	MX	N0	T3		A9I9			YES
TCGA-HZ-8519-01A	YES	73				247.64.0	Nationwide Children's Hospital	TCGA-HZ-8519-F57018	573231AD-48EB-4A13-81A9-D8548A829DEA	TCGA-HZ-8519	22	28		0			CA192E98-A24B-4126-8F0F-068CF3126559	Scheduled Follow-up Submission	Complete Remission/Response		Four Tier	Adenocarcinoma, NOS			No		YES		Tumor resection	NO	9	1.8	12	2	G3	0			No	MX	N0	T1		8519	TUMOR FREE	YES	YES	Complete Remission/Response	YES
TCGA-IB-AAUM-01A	YES	76	None			390.52.0	Nationwide Children's Hospital	TCGA-IB-AAUM-F67240	7BEAE531-E859-4268-94AE-216FE0D64A0F	TCGA-IB-AAUM	22	3		0			8EEE6A70-E891-4088-9410-8819E38CCAD1	Scheduled Follow-up Submission			Three Tier		NO	YES	No		YES		Tumor resection	NO	1	2.1	12	11	G3	1			No	M0	N1	T2		AAUM	WITH TUMOR	NO	YES	Partial Remission/Response	NO
TCGA-IB-7885-01A	YES	78	None			195.65.0	Nationwide Children's Hospital	TCGA-IB-7885-F45057	36D06162-B689-4BD0-87DE-C4C0144F7F0A	TCGA-IB-7885	22	3		0		YES	B35AD339-58F8-466C-9757-9D2F828C1C8F	Scheduled Follow-up Submission					NO	NO	No		YES		Tumor resection	NO	12	2.4	12	7	G2	3		20	No	M0	N1	T3		7885	TUMOR FREE	YES	YES	Complete Remission/Response	NO
TCGA-F2-A44H-01A	YES	65				284.63.0	Nationwide Children's Hospital	TCGA-F2-A44H-F55794	D257FF23-610B-4FF0-83C2-8CF78647A81B	TCGA-F2-A44H	22	15		0		YES	DB30B8E1-ED57-4022-B179-BAC245CFD68F	Scheduled Follow-up Submission	Complete Remission/Response				NO	YES	No		YES		Tissue Biopsy	NO	8	3.5	12	1	G2	0			No	M0	N0	T3		A44H	TUMOR FREE	YES	YES	Complete Remission/Response	YES
TCGA-FZ-5921-01A	YES	85				106.63.0	Nationwide Children's Hospital			TCGA-FZ-5921	22			0			29E994A9-4343-4E9F-8402-F1C1618D8C09								No		YES		Cytology (e.g. Peritoneal or pleural fluid)		10		12		GX	1			No	M0	N1	T3		5921			YES
TCGA-FZ-5921-11A	YES	85				106.63.0	Nationwide Children's Hospital			TCGA-FZ-5921	22			0			29E994A9-4343-4E9F-8402-F1C1618D8C09								No		YES		Cytology (e.g. Peritoneal or pleural fluid)		10		12		GX	1			No	M0	N1	T3		5921			YES
TCGA-FB-AAQ2-01A	YES	81	None			424.46.0	Nationwide Children's Hospital	TCGA-FB-AAQ2-F64879	C16C594F-F9B8-4863-B16D-3E40F04EDDD2	TCGA-FB-AAQ2	22	15	-198	0		NO	F196FFF7-77EE-4984-93B3-BC64B4B2C5D3	Scheduled Follow-up Submission	Progressive Disease		Four Tier		NO	YES	No		YES		Tissue Biopsy	NO	23	5.5	12	9	G3	2			No	MX	N1	T3		AAQ2	WITH TUMOR	NO	YES	Progressive Disease	NO
TCGA-FB-AAQ2-11A	YES	81	None			424.46.0	Nationwide Children's Hospital	TCGA-FB-AAQ2-F64879	C16C594F-F9B8-4863-B16D-3E40F04EDDD2	TCGA-FB-AAQ2	22	15	-198	0		NO	F196FFF7-77EE-4984-93B3-BC64B4B2C5D3	Scheduled Follow-up Submission	Progressive Disease		Four Tier		NO	YES	No		YES		Tissue Biopsy	NO	23	5.5	12	9	G3	2			No	MX	N1	T3		AAQ2	WITH TUMOR	NO	YES	Progressive Disease	NO
TCGA-IB-7644-01A	YES	65	Occasional Drinker			195.65.0	Nationwide Children's Hospital	TCGA-IB-7644-F44985	E3335CBC-3B80-4ACE-9DB5-19D7FF1858D7	TCGA-IB-7644	22	2		0		NO	CB7F864E-357B-4953-BF54-DFC574C46DC1	Scheduled Follow-up Submission					NO	YES	No		YES		Tumor resection	NO	8	2.3	12	7	G2	3		30	No	M1	N1	T3	Pancreatic Cancer	7644	WITH TUMOR	YES	YES	Progressive Disease	NO
TCGA-L1-A7W4-01A	YES	48	None			369.54.0	Nationwide Children's Hospital	TCGA-L1-A7W4-F69169	B5FFFD99-F076-4ACB-9AC1-22A01890C03F	TCGA-L1-A7W4	22	30		0		NO	AA9F3976-8918-4B50-A665-9B060ECB4E1D	Scheduled Follow-up Submission	Progressive Disease		Three Tier		NO	NO	No		YES		Tissue Biopsy	NO	11	2.8	12	12	G3	2			No	M0	N1	T3	Pancreatic Cancer	A7W4	WITH TUMOR	YES	YES	Progressive Disease	NO
TCGA-L1-A7W4-11A	YES	48	None			369.54.0	Nationwide Children's Hospital	TCGA-L1-A7W4-F69169	B5FFFD99-F076-4ACB-9AC1-22A01890C03F	TCGA-L1-A7W4	22	30		0		NO	AA9F3976-8918-4B50-A665-9B060ECB4E1D	Scheduled Follow-up Submission	Progressive Disease		Three Tier		NO	NO	No		YES		Tissue Biopsy	NO	11	2.8	12	12	G3	2			No	M0	N1	T3	Pancreatic Cancer	A7W4	WITH TUMOR	YES	YES	Progressive Disease	NO
TCGA-XN-A8T5-01A	YES	53				369.54.0	Nationwide Children's Hospital	TCGA-XN-A8T5-F70355	A46E8CAF-1E09-484F-9C8E-A532DFBA6F2E	TCGA-XN-A8T5	22	9		0			B856D919-2398-47AB-AFAB-D07834BF7BCB	Scheduled Follow-up Submission	Progressive Disease		Four Tier	moderately differentiated ductal adenocarcinoma 60% + neuroendocrine 40%	NO	YES	No		YES		Tumor resection	NO	6	2.5	12	2	G2	0	0	15.2	No	M0	N0	T2		A8T5	WITH TUMOR	YES	YES	Progressive Disease	YES
TCGA-HZ-7925-01A	YES	66				195.65.0	Nationwide Children's Hospital	TCGA-HZ-7925-F65863	FD9F0E0D-4813-44E0-B660-151572779E16	TCGA-HZ-7925	22	30		0			3A3E6D20-D1E5-4F6C-97DE-1F73FAC751F9	Scheduled Follow-up Submission	Progressive Disease						No		YES			NO	19	4.7	12	9	G2	2			No	MX	N1	T3	Pancreatic Cancer	7925	WITH TUMOR	YES	YES	Complete Remission/Response	NO
TCGA-2J-AAB4-01A	YES	48			Body & Tail of Pancreas	424.46.0	Nationwide Children's Hospital	TCGA-2J-AAB4-F62444	CE0B8128-82B9-4164-808F-1B4447134F54	TCGA-2J-AAB4	22	16		0	-292		A0652B33-8257-436D-B7A2-23581517AA6A	Scheduled Follow-up Submission			Four Tier	invasive, well-differentiated	YES	NO	No		YES		Tumor resection	NO	34	6.8	12	7	G2	0	0		No	M0	N1	T2		AAB4	TUMOR FREE	YES	YES	Complete Remission/Response	NO
TCGA-IB-AAUW-01A	YES	63	Occasional Drinker			392.50.0	Nationwide Children's Hospital	TCGA-IB-AAUW-F65795	EB4A8259-6666-4D2F-A86B-6E07E79BEF05	TCGA-IB-AAUW	22	3		0		YES	08375354-93B4-47B1-915F-AA4AF3AC4942	Scheduled Follow-up Submission	Progressive Disease				NO	YES	No		YES		Tumor resection	NO	9	3.5	12	11	G3	1			No	M0	N1	T3		AAUW	WITH TUMOR	YES	YES	Complete Remission/Response	NO
TCGA-F2-7276-01A	YES	64				195.65.0	Nationwide Children's Hospital	TCGA-F2-7276-F32754	E4FDEED3-06FB-4FC0-BAE8-8FAF438EC1D1	TCGA-F2-7276	22	11	-54	0		YES	258320C5-BF53-4E7B-9414-800FF9980128	Scheduled Follow-up Submission			Four Tier		NO	YES	No		YES		Tumor resection	NO	17	5.5	12	6	G1	9			No	M0	N1	T3	Pancreatic Cancer	7276	WITH TUMOR	YES	YES	Progressive Disease	NO
TCGA-H6-A45N-01A	YES	88	Daily Drinker	1		284.63.0	Nationwide Children's Hospital	TCGA-H6-A45N-F41735	E4B5CB14-845B-46C2-AB71-1D253B98BAB2	TCGA-H6-A45N	22	26		0		YES	8B68EFBB-1E40-4EFB-B45D-7AFE465B1261	Scheduled Follow-up Submission	Progressive Disease	7		Poorly differentiated pancreatic adenocarcinoma	NO	NO	No		YES	Fine Needle Aspiration	Other method, specify:	NO	12	9	12	3	G3	1	0	1	Yes, History of Prior Malignancy	MX	N1	T3	Pancreatic Cancer	A45N	WITH TUMOR	NO	YES	Progressive Disease	NO
TCGA-H6-A45N-11A	YES	88	Daily Drinker	1		284.63.0	Nationwide Children's Hospital	TCGA-H6-A45N-F41735	E4B5CB14-845B-46C2-AB71-1D253B98BAB2	TCGA-H6-A45N	22	26		0		YES	8B68EFBB-1E40-4EFB-B45D-7AFE465B1261	Scheduled Follow-up Submission	Progressive Disease	7		Poorly differentiated pancreatic adenocarcinoma	NO	NO	No		YES	Fine Needle Aspiration	Other method, specify:	NO	12	9	12	3	G3	1	0	1	Yes, History of Prior Malignancy	MX	N1	T3	Pancreatic Cancer	A45N	WITH TUMOR	NO	YES	Progressive Disease	NO
TCGA-IB-7889-01A	YES	85				195.65.0	Nationwide Children's Hospital	TCGA-IB-7889-F45060	38D9C111-733C-42D9-8AA9-64D4D4B56657	TCGA-IB-7889	22	3		0		YES	80F96D89-FD7E-4002-B940-0AE867117D2E	Scheduled Follow-up Submission					NO	NO	No		YES		Cytology (e.g. Peritoneal or pleural fluid)	NO	13	2.5	12	7	G1	3			No	M0	N1	T3	Pancreatic Cancer	7889	WITH TUMOR	YES	YES	Progressive Disease	NO
TCGA-IB-A7LX-01A	YES	57	Occasional Drinker			369.54.0	Nationwide Children's Hospital	TCGA-IB-A7LX-F56394	0AD20849-798D-4EA7-A803-2F2ED9226033	TCGA-IB-A7LX	22	4		0			4313F207-CCF5-4766-887D-11EE3548BBE7	Additional New Tumor Event	Progressive Disease				NO	NO	No		YES		Tumor resection	NO	6	5.5	12	2	G2	4			No	MX	N1	T3	Pancreatic Cancer	A7LX	WITH TUMOR	NO	YES		NO
TCGA-3A-A9IR-01A	YES	64	Occasional Drinker			392.50.0	Nationwide Children's Hospital	TCGA-3A-A9IR-F69135	8454544E-EF3B-4D9D-A839-61352B34B6AA	TCGA-3A-A9IR	22	29		0		YES	83F3146A-6F0F-4EF7-B99B-0E0A262882F6	Scheduled Follow-up Submission			Four Tier	NEUROENDOCRINE CARCINOMA NOS	NO	NO	No		YES		Tissue Biopsy	NO	13	4	12	12	G1	0	0		No	MX	N0	T2		A9IR	TUMOR FREE	NO	YES	Complete Remission/Response	NO
TCGA-HZ-A8P0-01A	YES	76	Social Drinker			369.54.0	Nationwide Children's Hospital			TCGA-HZ-A8P0	22			0		YES	5037DBCE-3B38-43EF-8821-85CDC6149E2F						NO	NO	No		YES		Tumor resection		24	3.1	12		G1	15		20	Yes, History of Prior Malignancy	MX	N1	T3		A8P0			YES
TCGA-2L-AAQE-01A	YES	56	Daily Drinker	2		410.47.0	Nationwide Children's Hospital	TCGA-2L-AAQE-F62936	435F7594-FA22-4FED-8215-F4785B2B03E2	TCGA-2L-AAQE	22	29	-171	0	-171		D5B04127-8AE9-4C88-9653-AF845044AC66	Scheduled Follow-up Submission	Progressive Disease	7	Three Tier		YES	YES	No		YES		Tumor resection	NO	22	4.5	12	7	G2	1		30	No	M0	N1	T3	Pancreatic Cancer	AAQE	WITH TUMOR	YES	YES	Progressive Disease	NO
TCGA-2L-AAQE-11A	YES	56	Daily Drinker	2		410.47.0	Nationwide Children's Hospital	TCGA-2L-AAQE-F62936	435F7594-FA22-4FED-8215-F4785B2B03E2	TCGA-2L-AAQE	22	29	-171	0	-171		D5B04127-8AE9-4C88-9653-AF845044AC66	Scheduled Follow-up Submission	Progressive Disease	7	Three Tier		YES	YES	No		YES		Tumor resection	NO	22	4.5	12	7	G2	1		30	No	M0	N1	T3	Pancreatic Cancer	AAQE	WITH TUMOR	YES	YES	Progressive Disease	NO
TCGA-HZ-A77Q-01A	YES	55				369.54.0	Nationwide Children's Hospital			TCGA-HZ-A77Q	22			0		NO	129B0962-727B-49BA-8064-C6353C6FD006				Four Tier	Adenocarcinoma, NOS	NO	YES	No		YES		Tissue Biopsy		19	2.8	12		G2	1		15	Yes, History of Prior Malignancy	MX	N1	T3		A77Q			YES
TCGA-F2-A44G-01A	YES	79	Daily Drinker	1		284.63.0	Nationwide Children's Hospital	TCGA-F2-A44G-F47558	DDEAC5BF-507D-493F-92B2-C8A663E47B62	TCGA-F2-A44G	22	26		0		NO	EAE6000B-B5C9-45EA-BA06-D4744B7353AC	Scheduled Follow-up Submission					NO	NO	No		YES		Tumor resection	NO	16	3.5	12	8	G2	3			Yes, History of Prior Malignancy	M0	N1	T3	Pancreatic Cancer	A44G	WITH TUMOR	YES	YES	Complete Remission/Response	YES
TCGA-HZ-7919-01A	YES	52				195.65.0	Nationwide Children's Hospital	TCGA-HZ-7919-F66193	A5636126-D1C9-41FF-9BC6-50775811A591	TCGA-HZ-7919	22	3		0			93E68CF9-EB0C-4185-8C23-72D2B50A6646	Scheduled Follow-up Submission	Progressive Disease		Four Tier				No		YES		Cytology (e.g. Peritoneal or pleural fluid)	NO	10	4	12	10	G2	2			No	M0	N1	T3	Pancreatic Cancer	7919	WITH TUMOR		YES
TCGA-FZ-5920-01A	YES	52				106.63.0	Nationwide Children's Hospital	TCGA-FZ-5920-F49534	69C72AEE-4878-48BA-A44D-C4D07320FB7C	TCGA-FZ-5920	22	3		0			C4D795EF-AECA-4F7D-86EE-8F159876DA72	Scheduled Follow-up Submission							No		YES		Cytology (e.g. Peritoneal or pleural fluid)	YES	9	3.5	12	10	G3	3			No	M0	N1	T3		5920		NO	YES		NO
TCGA-FZ-5920-11A	YES	52				106.63.0	Nationwide Children's Hospital	TCGA-FZ-5920-F49534	69C72AEE-4878-48BA-A44D-C4D07320FB7C	TCGA-FZ-5920	22	3		0			C4D795EF-AECA-4F7D-86EE-8F159876DA72	Scheduled Follow-up Submission							No		YES		Cytology (e.g. Peritoneal or pleural fluid)	YES	9	3.5	12	10	G3	3			No	M0	N1	T3		5920		NO	YES		NO
TCGA-US-A77E-01A	YES	73	Daily Drinker	1		330.58.0	Nationwide Children's Hospital			TCGA-US-A77E	22			0		YES	EE65EF43-C34C-4877-B7FF-373821B6110E			7	Four Tier	Adenocarcinoma- NOS	NO	NO	No		YES				13	3.5	12		G3	2	0		Yes, History of Prior Malignancy	MX	N1	T3		A77E			YES
TCGA-US-A77E-11A	YES	73	Daily Drinker	1		330.58.0	Nationwide Children's Hospital			TCGA-US-A77E	22			0		YES	EE65EF43-C34C-4877-B7FF-373821B6110E			7	Four Tier	Adenocarcinoma- NOS	NO	NO	No		YES				13	3.5	12		G3	2	0		Yes, History of Prior Malignancy	MX	N1	T3		A77E			YES
TCGA-HV-A5A3-01A	YES	50	Occasional Drinker			284.63.0	Nationwide Children's Hospital			TCGA-HV-A5A3	22			0			406163E6-967F-485A-9E21-4A858E73AFFB				Three Tier		NO	NO	No		YES		Tumor resection		25		12		G2	5			No	MX	NX	T3		A5A3			YES
TCGA-HV-A5A3-11A	YES	50	Occasional Drinker			284.63.0	Nationwide Children's Hospital			TCGA-HV-A5A3	22			0			406163E6-967F-485A-9E21-4A858E73AFFB				Three Tier		NO	NO	No		YES		Tumor resection		25		12		G2	5			No	MX	NX	T3		A5A3			YES
TCGA-HV-A7OP-01A	YES	72	Weekly Drinker	0.5		349.58.0	Nationwide Children's Hospital	TCGA-HV-A7OP-F67211	458E13DA-8278-4DD4-B511-26861A832CF1	TCGA-HV-A7OP	22	30		0		NO	6EC3299C-7C4A-485C-9959-841280E9EC02	Scheduled Follow-up Submission	Partial Remission/Response	3	Three Tier	Intraductal tubulopapillary neoplasm	NO	NO	No		YES		Tumor resection	NO	28	6.5	12	4	GX	7			No	M0	N1	T3		A7OP		YES	YES		YES
TCGA-3A-A9IJ-01A	YES	65				410.47.0	Nationwide Children's Hospital	TCGA-3A-A9IJ-F69254	0FF13A75-B02E-4F00-842A-B773296110D6	TCGA-3A-A9IJ	22	31		0		NO	EA63A5B6-BD57-4229-90DF-EB1D07470BF5	Scheduled Follow-up Submission	Complete Remission/Response		Four Tier	NEUROENDOCRINE CARCINOMA NOS	NO	NO	No		YES		Tissue Biopsy	NO	16	3.5	12	12	G1	0	0	25	Yes, History of Prior Malignancy	MX	N0	T2		A9IJ	TUMOR FREE	NO	YES	Complete Remission/Response	NO
TCGA-IB-A5SP-01A	YES	77	None			330.58.0	Nationwide Children's Hospital	TCGA-IB-A5SP-F67889	F7FE8081-FF27-4F01-9086-DFC24D09B663	TCGA-IB-A5SP	22	12		0		YES	795CA4F5-69C0-4850-BE1A-F9B8EDE899ED	Scheduled Follow-up Submission					NO	NO	No		YES		Cytology (e.g. Peritoneal or pleural fluid)	NO	14	3	12	11	G2	0			No	M0	N0	T3		A5SP	WITH TUMOR	YES	YES		NO
TCGA-M8-A5N4-01A	YES	48	Social Drinker			284.63.0	Nationwide Children's Hospital			TCGA-M8-A5N4	22						06467440-8827-45A7-999B-2BFECA79EF3A				Four Tier		NO	NO	No		YES		Cytology (e.g. Peritoneal or pleural fluid)		1	3.4	12		G2	0			No	M0	N0	T3		A5N4			YES
TCGA-3A-A9IC-01A	YES	61	Weekly Drinker			392.50.0	Nationwide Children's Hospital			TCGA-3A-A9IC	22			0		YES	4A50C5A0-842C-4DE5-9A5A-E17D79F907CD						YES	NO	No		YES		Tissue Biopsy		21	4	12		G2	4	0		No	MX	N1	T3		A9IC			YES
TCGA-FB-A7DR-01A	YES	48	Weekly Drinker	1		349.58.0	Nationwide Children's Hospital	TCGA-FB-A7DR-F61163	52317D74-90B6-4D3B-A6AA-E4908AB7DBB1	TCGA-FB-A7DR	22	25		0		NO	385ACDD2-DD93-47CD-8F56-1F07DB6D5623	Scheduled Follow-up Submission	Progressive Disease	3	Four Tier			NO	No		YES		Tissue Biopsy	NO		3	12	6	G2			20	No	M0	NX	T3	Pancreatic Cancer	A7DR			NO	Complete Remission/Response	NO
TCGA-LB-A8F3-01A	YES	64	None			369.54.0	Nationwide Children's Hospital	TCGA-LB-A8F3-F64979	00435A0B-4238-417B-B27D-BD46F7DE0D48	TCGA-LB-A8F3	22	16		0		YES	ACE05261-6188-4BD8-9AEB-93D37BA11503	Scheduled Follow-up Submission			Four Tier			NO	No		YES		Tumor resection	NO	10	5	12	9	G1	0			No	MX	N0	T3		A8F3	TUMOR FREE	YES	YES		YES
TCGA-FB-AAPZ-01A	YES	54				424.46.0	Nationwide Children's Hospital	TCGA-FB-AAPZ-F68917	42DA0B77-1875-4E53-AD27-7B77C0C7EFF7	TCGA-FB-AAPZ	22	23		0		YES	16277A82-C245-4C36-AA0C-F68C873BF13C	Scheduled Follow-up Submission	Progressive Disease		Three Tier		NO	NO	No		YES		Tissue Biopsy	NO	12	3.8	12	12	G3	1			No	MX	N1	T2		AAPZ		YES	YES	Complete Remission/Response	NO
TCGA-FB-AAPZ-11A	YES	54				424.46.0	Nationwide Children's Hospital	TCGA-FB-AAPZ-F68917	42DA0B77-1875-4E53-AD27-7B77C0C7EFF7	TCGA-FB-AAPZ	22	23		0		YES	16277A82-C245-4C36-AA0C-F68C873BF13C	Scheduled Follow-up Submission	Progressive Disease		Three Tier		NO	NO	No		YES		Tissue Biopsy	NO	12	3.8	12	12	G3	1			No	MX	N1	T2		AAPZ		YES	YES	Complete Remission/Response	NO
TCGA-IB-7652-01A	YES	49	None			195.65.0	Nationwide Children's Hospital	TCGA-IB-7652-F45055	5D031209-B081-4123-A290-001A08F46C1C	TCGA-IB-7652	22	3		0		NO	DD31A223-3FCB-4297-82A6-50D65AB805F6	Scheduled Follow-up Submission					NO	NO	No		YES		Tissue Biopsy	NO	20	4.2	12	7	G2	1			No	M0	N1	T3		7652	TUMOR FREE	YES	YES	Complete Remission/Response	NO
TCGA-HV-A5A4-01A	YES	72				284.63.0	Nationwide Children's Hospital			TCGA-HV-A5A4	22			0			D132DA92-F5CD-4DBC-A9C1-D55D170673AA				Three Tier		NO	NO	No		YES		Tumor resection		18		12		G2	1			No	MX	N0	T3		A5A4
TCGA-HV-A5A6-01A	YES	65				284.63.0	Nationwide Children's Hospital	TCGA-HV-A5A6-F66960	E3F9581E-23E4-464A-A478-3D285D583B50	TCGA-HV-A5A6	22	3		0			FF4776FA-C226-4B37-8932-A503F433826D	Scheduled Follow-up Submission					NO	NO	No		YES		Tumor resection	YES	22		12	11	G1	2			No	M0	N1b	T3	Other malignancy	A5A6	WITH TUMOR	YES	YES	Progressive Disease	NO
TCGA-FB-A78T-01A	YES	71				330.58.0	Nationwide Children's Hospital	TCGA-FB-A78T-F59978	91B6F772-CA7A-4617-8F27-6962B2BBC5BE	TCGA-FB-A78T	22	27		0		YES	12238C20-68F7-4B58-BADB-88A1A6281FC0	Scheduled Follow-up Submission			Three Tier			NO	No		YES		Tumor resection	NO	22	3.5	12	5	G2	4		2	No	M0	N1	T3	Pancreatic Cancer	A78T		YES	YES	Complete Remission/Response	NO
TCGA-Z5-AAPL-01A	YES	74			Body and Tail	424.46.0	Nationwide Children's Hospital	TCGA-Z5-AAPL-F69054	6E0E4E05-E90C-469B-8039-630009F29F41	TCGA-Z5-AAPL	22	24		0			0634A77A-9C1F-4DB4-9539-AAF827CF9C81	Scheduled Follow-up Submission							No		YES		Tumor resection	NO	9		12	12	G1	0			No	M0	N0	T3		AAPL	TUMOR FREE	YES	YES	Complete Remission/Response	NO
TCGA-IB-AAUR-01A	YES	67	None			392.50.0	Nationwide Children's Hospital	TCGA-IB-AAUR-F65778	4A4BD1D9-74BD-4C17-9E8C-86D6CDCC07ED	TCGA-IB-AAUR	22	30		0			870638F1-C9AD-417F-9D55-E47447816957	Scheduled Follow-up Submission	Progressive Disease				NO	YES	No		YES		Tumor resection	NO	21	3.7	12	9	G1	9			No	M0	N1	T3		AAUR	WITH TUMOR	NO	YES	Partial Remission/Response	NO
TCGA-YH-A8SY-01A	YES	73	Weekly Drinker			390.52.0	Nationwide Children's Hospital			TCGA-YH-A8SY	22			0		NO	7B2DD238-0E0F-43B9-893F-97D15069924A			2	Three Tier		NO	NO	No		YES		Cytology (e.g. Peritoneal or pleural fluid)		27	4.1	12		G2	16			No	MX	N1	T3		A8SY			YES
TCGA-S4-A8RP-01A	YES	77	Social Drinker			369.54.0	Nationwide Children's Hospital			TCGA-S4-A8RP	22			0		YES	F5ADEFC2-D653-42BF-9CD5-396790FCCD02				Three Tier		NO	NO	No		YES		Tumor resection		10	2.8	12		G3	2	0	26	No	MX	N1	T3		A8RP			YES
TCGA-HZ-7289-01A	YES	77				195.65.0	Nationwide Children's Hospital	TCGA-HZ-7289-F64073	22FCDC65-A0EA-4695-9A33-AC405C4140C0	TCGA-HZ-7289	22	25		0			AD007D56-7939-4601-8D18-C7BC2AAA523F	Scheduled Follow-up Submission	Progressive Disease			Adenocarcinoma, NOS			No		YES		Tissue Biopsy	NO	9	4.5	12	8	G1	1			Yes, History of Prior Malignancy	MX	N1	T3	Pancreatic Cancer	7289	WITH TUMOR	NO	YES		NO
TCGA-S4-A8RM-01A	YES	67	Weekly Drinker	3	overlapping parts of pancreas	390.52.0	Nationwide Children's Hospital	TCGA-S4-A8RM-F67114	38DC15F7-6FA5-4B86-9D05-D7536BDE6A38	TCGA-S4-A8RM	22	31		0		YES	2DA99FD6-CBCA-4402-BEDF-37C86910BB01	Scheduled Follow-up Submission	Complete Remission/Response	4	Three Tier		NO	YES	No		YES		Tumor resection	NO	9	6	12	10	G3	1	0	25	No	MX	N1	T3		A8RM	TUMOR FREE	YES	YES	Complete Remission/Response	NO
TCGA-2J-AABI-01A	YES	55	Social Drinker	1		424.46.0	Nationwide Children's Hospital	TCGA-2J-AABI-F62439	3F55B20B-42C5-4FEB-8CF7-8195501BC485	TCGA-2J-AABI	22	16		0	-46	NO	6C881557-277E-4012-8212-CEFEAAF18CB8	Scheduled Follow-up Submission		0.5	Four Tier	Poorly differentiated adenocarcinoma	YES	NO	No		YES		Tumor resection	NO	19	3.5	12	7	G3	0	0	42	No	M0	N0	T3		AABI	WITH TUMOR	YES	YES	Progressive Disease	YES
TCGA-FZ-5923-01A	YES	71				106.63.0	Nationwide Children's Hospital	TCGA-FZ-5923-F49536	689856E7-0E7D-4172-A19F-2473DBF6B813	TCGA-FZ-5923	22	3		0		YES	31768208-8993-4BD0-9288-BB94F70FDD91	Scheduled Follow-up Submission	Progressive Disease						No		YES		Tissue Biopsy	NO	13	3.8	12	10	G1	1			No	M1	N1	T4		5923	WITH TUMOR	YES	YES	Progressive Disease	NO
TCGA-FZ-5923-11A	YES	71				106.63.0	Nationwide Children's Hospital	TCGA-FZ-5923-F49536	689856E7-0E7D-4172-A19F-2473DBF6B813	TCGA-FZ-5923	22	3		0		YES	31768208-8993-4BD0-9288-BB94F70FDD91	Scheduled Follow-up Submission	Progressive Disease						No		YES		Tissue Biopsy	NO	13	3.8	12	10	G1	1			No	M1	N1	T4		5923	WITH TUMOR	YES	YES	Progressive Disease	NO
TCGA-IB-8126-01A	YES	79	None			247.64.0	Nationwide Children's Hospital	TCGA-IB-8126-F44983	AE61618A-F6AE-405C-A464-91A3176EA510	TCGA-IB-8126	22	2		0		YES	D9059818-846A-40FD-A3A5-BE2284D7390D	Scheduled Follow-up Submission					NO	YES	No		YES		Tumor resection	YES	10	3.5	12	7	G1	5		4	No	M0	N1	T4		8126			YES
TCGA-IB-A6UF-01A	YES	63	Daily Drinker	1		349.58.0	Nationwide Children's Hospital	TCGA-IB-A6UF-F64545	6FDEFECA-EB07-4274-9A2E-836A16DDF224	TCGA-IB-A6UF	22	4	-551	0			90E5CDD5-97B4-4351-8187-0DFA25D30C73	Scheduled Follow-up Submission		6	Four Tier		NO	YES	No		YES		Tissue Biopsy	NO	18	3.3	12	9	G2	7		40	No	M0	N1	T3		A6UF	WITH TUMOR	YES	YES	Partial Remission/Response	NO
TCGA-3A-A9IO-01A	YES	55	Occasional Drinker			392.50.0	Nationwide Children's Hospital	TCGA-3A-A9IO-F69134	5B1C31B4-0D9B-4111-8FAC-55CE41CAD5D9	TCGA-3A-A9IO	22	29		0		NO	98D1B12E-E905-489D-A33D-9D3C347C459F	Scheduled Follow-up Submission			Four Tier	NEUROENDOCRINE CARCINOMA NOS	NO	YES	No		YES		Tissue Biopsy	NO		3	12	12	G1				No	MX	NX	TX		A9IO	TUMOR FREE	NO	NO		NO
TCGA-2J-AABF-01A	YES	73	Weekly Drinker	1		424.46.0	Nationwide Children's Hospital	TCGA-2J-AABF-F62441	79EE881D-E413-43FB-B466-A3DC79CE35AA	TCGA-2J-AABF	22	16		0		YES	4769E338-99CB-4A05-B76C-F50A85164DF7	Scheduled Follow-up Submission		3	Four Tier		NO	NO	No		YES		Tumor resection	NO	18	3.2	12	7	G3	4	0	7.5	No	M0	N1	T3	Pancreatic Cancer	AABF	WITH TUMOR	YES	YES	Progressive Disease	YES
TCGA-HZ-A77P-01A	YES	77				349.58.0	Nationwide Children's Hospital	TCGA-HZ-A77P-F65995	792AAB2B-3795-41AA-815B-55A7E086C0A8	TCGA-HZ-A77P	22	1		0		YES	58C4C4F2-87BA-4934-B323-AE9704F0E93D	Scheduled Follow-up Submission	Complete Remission/Response		Four Tier	Adenocarcinoma, NOS	NO	NO	No		YES		Tissue Biopsy	NO	21	3.1	12	10	G1	1			No	MX	N1	T3		A77P	TUMOR FREE	YES	YES	Complete Remission/Response	NO
TCGA-2J-AABV-01A	YES	74				424.46.0	Nationwide Children's Hospital	TCGA-2J-AABV-F62442	3D73EEA2-37A3-48DD-8873-9F62D60C0A68	TCGA-2J-AABV	22	16		0			3CC8232F-9E41-400A-B5C1-8B2A10449A20	Scheduled Follow-up Submission			Four Tier		NO	NO	No		YES		Tumor resection	NO	28	4.1	12	7	G4	13	0	30	No	M0	N1	T3	Pancreatic Cancer	AABV	WITH TUMOR	YES	YES	Progressive Disease	NO
TCGA-3A-A9IZ-01A	YES	47				424.46.0	Nationwide Children's Hospital			TCGA-3A-A9IZ	22			0		NO	7BABD606-F5FB-42D9-BAD6-F8DE34A07EFA				Four Tier		NO	NO	No		YES		Tissue Biopsy		21	4	12		G2	3	0		No	MX	N1	T3		A9IZ			YES
TCGA-XD-AAUI-01A	YES	50	Occasional Drinker			424.46.0	Nationwide Children's Hospital	TCGA-XD-AAUI-F69139	E8855890-F38C-46FD-9D96-E425A0A03193	TCGA-XD-AAUI	22	29		0		NO	FB7D3BC8-67D8-42BB-8A43-C64AA93D590F	Scheduled Follow-up Submission	Progressive Disease					YES	No		YES		Tissue Biopsy	NO	33	3.5	12	12	G2	10			No	MX	N1	T3	Pancreatic Cancer	AAUI	WITH TUMOR	YES	YES	Progressive Disease	NO
TCGA-3A-A9IN-01A	YES	62	Daily Drinker	1		410.47.0	Nationwide Children's Hospital	TCGA-3A-A9IN-F69255	AED75D64-A01A-4E16-BDF5-97B263AEE739	TCGA-3A-A9IN	22	31		0		YES	5B480347-F83B-4402-9A46-3C9D3A12BF16	Scheduled Follow-up Submission	Complete Remission/Response	7	Four Tier	NEUROENDOCRINE CARCINOMA NOS	NO	NO	No	Subtotal pancreatectomy	YES		Tissue Biopsy	NO		5	12	12	G2				No	MX	NX	T2		A9IN	TUMOR FREE	YES	NO	Complete Remission/Response	YES
TCGA-S4-A8RO-01A	YES	75	Weekly Drinker	2		390.52.0	Nationwide Children's Hospital	TCGA-S4-A8RO-F67195	C46F4E45-723E-4070-BAE3-215E94EA3163	TCGA-S4-A8RO	22	3		0		NO	C8AB1645-BE15-4E63-93B2-C4F902A4B87D	Scheduled Follow-up Submission		3	Three Tier		NO	NO	No		YES		Tumor resection	NO	17	4	12	11	G2	1	0		Yes, History of Prior Malignancy	MX	N1	T3		A8RO	WITH TUMOR	YES	YES	Complete Remission/Response	YES
TCGA-IB-AAUT-01A	YES	65	None			390.52.0	Nationwide Children's Hospital	TCGA-IB-AAUT-F65785	BE10353E-BEDE-4442-8AD6-7533748216AC	TCGA-IB-AAUT	22	30		0		YES	5C65A4F9-05CA-48A2-8A4C-EB81CFC1BBCF	Scheduled Follow-up Submission	Complete Remission/Response				NO	YES	No		YES		Tumor resection	NO	11		12	9	G1	7		15	No	M0	N1	T2		AAUT	TUMOR FREE	YES	YES	Complete Remission/Response	NO
TCGA-US-A779-01A	YES	54	Occasional Drinker			330.58.0	Nationwide Children's Hospital			TCGA-US-A779	22			0		NO	6E224426-1D66-4A53-BDB8-5289A90FEB58				Four Tier		NO	NO	No		YES		Tumor resection		21	3	12		G1	2	0		No	MX	N1b	T3		A779			YES
TCGA-US-A779-11A	YES	54	Occasional Drinker			330.58.0	Nationwide Children's Hospital			TCGA-US-A779	22			0		NO	6E224426-1D66-4A53-BDB8-5289A90FEB58				Four Tier		NO	NO	No		YES		Tumor resection		21	3	12		G1	2	0		No	MX	N1b	T3		A779			YES
TCGA-F2-6880-01A	YES	70	Daily Drinker	2		195.65.0	Nationwide Children's Hospital	TCGA-F2-6880-F32769	49618A08-76FB-4BF9-8F52-E4F75CEC6905	TCGA-F2-6880	22	11		0		NO	1CA9EFDC-0980-43EC-A27E-3B6D994B3D24	Scheduled Follow-up Submission		7	Four Tier		NO	YES	No		YES		Tumor resection	YES	9	2.2	12	6	G1	1		15	No	M0	N1	T3		6880			YES
TCGA-HZ-7926-01A	YES	57				195.65.0	Nationwide Children's Hospital	TCGA-HZ-7926-F65859	82B25401-D609-45B1-B60C-BE215CB792BC	TCGA-HZ-7926	22	30		0			C9A4A2B7-244F-415F-9ABC-93134DF1B3D0	Scheduled Follow-up Submission	Progressive Disease						No		YES		Cytology (e.g. Peritoneal or pleural fluid)	NO	13	3.5	12	9	G1	2			No	MX	N1	T3	Pancreatic Cancer	7926	WITH TUMOR		YES	Progressive Disease
TCGA-XD-AAUH-01A	YES	57	Daily Drinker			424.46.0	Nationwide Children's Hospital	TCGA-XD-AAUH-F69138	473A0CC5-1C2D-4A17-9C57-E9A4A9CB31DF	TCGA-XD-AAUH	22	6		0		YES	8A39D056-BA06-4789-98C2-2573707CD92E	Scheduled Follow-up Submission					NO	NO	No		YES		Tumor resection	NO	30	2.8	12	1	G2	7			No	M0	N1	T3		AAUH		YES	YES		YES
TCGA-XD-AAUH-11A	YES	57	Daily Drinker			424.46.0	Nationwide Children's Hospital	TCGA-XD-AAUH-F69138	473A0CC5-1C2D-4A17-9C57-E9A4A9CB31DF	TCGA-XD-AAUH	22	6		0		YES	8A39D056-BA06-4789-98C2-2573707CD92E	Scheduled Follow-up Submission					NO	NO	No		YES		Tumor resection	NO	30	2.8	12	1	G2	7			No	M0	N1	T3		AAUH		YES	YES		YES
TCGA-Q3-AA2A-01A	YES	64	None			390.52.0	Nationwide Children's Hospital	TCGA-Q3-AA2A-F62635	D3421C09-AFDE-4606-9E28-C6C649D2BB06	TCGA-Q3-AA2A	22	22		0			7B1EFF92-EBF8-4D02-A4E5-00913DAA0CB3	Scheduled Follow-up Submission			Three Tier			NO	No		YES		Tumor resection	NO	26		12	7	G1	9	0		No	MX	N1	T3		AA2A	TUMOR FREE	NO	YES		NO
TCGA-YB-A89D-01A	YES	59				369.54.0	Nationwide Children's Hospital	TCGA-YB-A89D-F67752	928ECAA3-6182-42FD-95F8-EC1CE3195D8B	TCGA-YB-A89D	22	11		0		YES	9A9E840E-FF4F-4253-82B1-F6E0E5AB02BB	Scheduled Follow-up Submission			Four Tier		NO	YES	No		YES		Tumor resection	NO	17	3.2	12	11	G2	4			No	MX	N1	T3		A89D	TUMOR FREE	YES	YES	Complete Remission/Response	YES
TCGA-YB-A89D-11A	YES	59				369.54.0	Nationwide Children's Hospital	TCGA-YB-A89D-F67752	928ECAA3-6182-42FD-95F8-EC1CE3195D8B	TCGA-YB-A89D	22	11		0		YES	9A9E840E-FF4F-4253-82B1-F6E0E5AB02BB	Scheduled Follow-up Submission			Four Tier		NO	YES	No		YES		Tumor resection	NO	17	3.2	12	11	G2	4			No	MX	N1	T3		A89D	TUMOR FREE	YES	YES	Complete Remission/Response	YES
TCGA-3A-A9IL-01A	YES	39				392.50.0	Nationwide Children's Hospital	TCGA-3A-A9IL-F69133	B2B2CBAD-9251-4BE9-94D0-084FCB81E398	TCGA-3A-A9IL	22	29		0		NO	947EA230-D157-4442-98B6-EF85ED58E297	Scheduled Follow-up Submission			Four Tier	NEUROENDOCRINE CARCINOMA NOS	NO	NO	No		YES		Tissue Biopsy	NO	9	1.3	12	12	G1	5	0		Yes, History of Prior Malignancy	MX		T1		A9IL	TUMOR FREE	NO	YES		NO
TCGA-IB-AAUQ-01A	YES	50	Social Drinker			424.46.0	Nationwide Children's Hospital	TCGA-IB-AAUQ-F60164	32397A95-61FF-457C-A6CC-B01E40EFAAC7	TCGA-IB-AAUQ	22	8		0		YES	2749546A-E120-453D-93A3-955739944AA2	Additional New Tumor Event	Progressive Disease				NO	NO	No		YES		Tumor resection	NO	21	4.5	12	7	G2	13		69	No	M0	N1	T3	Pancreatic Cancer	AAUQ	WITH TUMOR	NO	YES	Partial Remission/Response	NO
TCGA-IB-A5SS-01A	YES	64				330.58.0	Nationwide Children's Hospital	TCGA-IB-A5SS-F60364	47DA2C88-B90C-4A33-AA66-4D347A55CE7E	TCGA-IB-A5SS	22	23	-11	0			B3A1ADA0-767F-4AA2-ACD5-6843F151ADA8	Scheduled Follow-up Submission					NO	YES	No		YES		Tumor resection	NO	7	4.5	12	7	G3	5		20	Yes, History of Prior Malignancy	M0	N1	T3	Pancreatic Cancer	A5SS	WITH TUMOR	YES	YES	Complete Remission/Response	NO
TCGA-HZ-A49G-01A	YES	58				284.63.0	Nationwide Children's Hospital	TCGA-HZ-A49G-F60083	BEE227D0-E92A-4214-B0D8-3EEC97F9DF7E	TCGA-HZ-A49G	22	29		0			CCF37DFA-DFAE-438D-8E9F-C0D3503B7C97	Scheduled Follow-up Submission	Progressive Disease		Four Tier				No		YES		Cytology (e.g. Peritoneal or pleural fluid)	NO	18	3	12	5	G2	3			No	MX	N1	T2		A49G	WITH TUMOR	YES	YES	Progressive Disease	YES
TCGA-FZ-5924-01A	YES	83				106.63.0	Nationwide Children's Hospital	TCGA-FZ-5924-F49537	2B0E03DB-4D46-4B4D-8864-52C15CF4FC21	TCGA-FZ-5924	22	3		0			1E67C3FB-FDFC-4E7C-93E2-02383B822093	Scheduled Follow-up Submission	Progressive Disease						No	Pancreaticoduodenectomy	YES		Cytology (e.g. Peritoneal or pleural fluid)	NO	18	3.2	12	10	G3	2			Yes, History of Prior Malignancy	M0	N1	T3		5924	WITH TUMOR	YES	YES	Progressive Disease	NO
TCGA-FZ-5924-11A	YES	83				106.63.0	Nationwide Children's Hospital	TCGA-FZ-5924-F49537	2B0E03DB-4D46-4B4D-8864-52C15CF4FC21	TCGA-FZ-5924	22	3		0			1E67C3FB-FDFC-4E7C-93E2-02383B822093	Scheduled Follow-up Submission	Progressive Disease						No	Pancreaticoduodenectomy	YES		Cytology (e.g. Peritoneal or pleural fluid)	NO	18	3.2	12	10	G3	2			Yes, History of Prior Malignancy	M0	N1	T3		5924	WITH TUMOR	YES	YES	Progressive Disease	NO
TCGA-XN-A8T3-01A	YES	67				369.54.0	Nationwide Children's Hospital	TCGA-XN-A8T3-F70353	139E8CF8-FA4F-4BEA-BB58-F9B2D27E2EF0	TCGA-XN-A8T3	22	9		0			92D94D72-21A2-49B8-AAC3-21790A06905F	Scheduled Follow-up Submission	Partial Remission/Response		Four Tier		NO	NO	No		YES		Tumor resection	NO	15	2.4	12	2	G2	0	0		No	M0	N0	T2		A8T3	WITH TUMOR	YES	YES	Progressive Disease	YES
TCGA-2J-AAB6-01A	YES	75				424.46.0	Nationwide Children's Hospital			TCGA-2J-AAB6	22			0			384D10F0-19A1-4EB9-A7CF-C74500BF774F				Four Tier		NO	NO	No		YES		Tumor resection		18	5	12		G2	0	0		No	M0	N0	T3		AAB6			YES
TCGA-IB-AAUS-01A	YES	84	Daily Drinker	2.5	Pancreas Head and Body	392.50.0	Nationwide Children's Hospital	TCGA-IB-AAUS-F65781	C3170121-177E-43BF-BED4-703A5BB8FD8E	TCGA-IB-AAUS	22	30	-49	0		YES	15CDC0ED-33A6-44E3-A4FD-8821BC3E7DC1	Scheduled Follow-up Submission					NO	YES	No		YES		Tumor resection	NO	14	4	12	9	G2	2		40	No	M0	N1	T3		AAUS	WITH TUMOR	YES	YES		NO
TCGA-IB-AAUU-01A	YES	35	None			390.52.0	Nationwide Children's Hospital	TCGA-IB-AAUU-F65787	51D09A1D-572D-4378-B60B-CB8D1E1CCCA3	TCGA-IB-AAUU	22	30		0		YES	EAF2D251-D6D1-44B3-9610-D4E2DD8DB93B	Scheduled Follow-up Submission	Complete Remission/Response				NO	NO	No		YES		Tumor resection	NO	16	3	12	9	G3	2		15	No	M0	N1	T3		AAUU	TUMOR FREE	YES	YES	Complete Remission/Response	NO
TCGA-US-A77J-01A	YES	81	Daily Drinker	1		330.58.0	Nationwide Children's Hospital			TCGA-US-A77J	22			0		YES	F33A4F86-BD26-4675-B6A8-99412E9B7E39			7	Four Tier		NO	NO	No		YES		Tumor resection		20	2.5	12		G2	4	0		No	MX	N1b	T3		A77J			YES
TCGA-US-A77J-11A	YES	81	Daily Drinker	1		330.58.0	Nationwide Children's Hospital			TCGA-US-A77J	22			0		YES	F33A4F86-BD26-4675-B6A8-99412E9B7E39			7	Four Tier		NO	NO	No		YES		Tumor resection		20	2.5	12		G2	4	0		No	MX	N1b	T3		A77J			YES
TCGA-HZ-8636-01A	YES	58				247.64.0	Nationwide Children's Hospital	TCGA-HZ-8636-F66194	A74049EA-5E9D-4020-AB00-F51BEB3D9850	TCGA-HZ-8636	22	3		0			290AC731-F653-432D-8C35-8E6C178BD2C6	Scheduled Follow-up Submission	Progressive Disease		Four Tier				No	Pancreaticoduodenectomy	YES		Tumor resection	NO	2	9	12	10	G3	0			No	M1	N0	T3	Pancreatic Cancer	8636	WITH TUMOR	YES	YES	Progressive Disease
TCGA-FB-AAPU-01A	YES	41	None			424.46.0	Nationwide Children's Hospital	TCGA-FB-AAPU-F64885	483FC015-7C4B-454F-9EE0-9269A08F4FA9	TCGA-FB-AAPU	22	15		0	-71		4BC2496C-BA45-49A3-8168-7278C7D18335	Scheduled Follow-up Submission	Progressive Disease		Three Tier		YES	NO	No		YES		Tumor resection	NO	12	4	12	9	G2	0			No	MX	N0	T3	Pancreatic Cancer	AAPU	WITH TUMOR	NO	YES	Progressive Disease	NO
TCGA-FB-AAPU-11A	YES	41	None			424.46.0	Nationwide Children's Hospital	TCGA-FB-AAPU-F64885	483FC015-7C4B-454F-9EE0-9269A08F4FA9	TCGA-FB-AAPU	22	15		0	-71		4BC2496C-BA45-49A3-8168-7278C7D18335	Scheduled Follow-up Submission	Progressive Disease		Three Tier		YES	NO	No		YES		Tumor resection	NO	12	4	12	9	G2	0			No	MX	N0	T3	Pancreatic Cancer	AAPU	WITH TUMOR	NO	YES	Progressive Disease	NO
TCGA-US-A774-01A	YES	76	Social Drinker			330.58.0	Nationwide Children's Hospital			TCGA-US-A774	22			0		YES	78D42429-D038-4B0E-939A-FF9BCB94CEB7				Four Tier		NO	NO	No		YES		Tumor resection		17	4	12		G3	2	0	4.65	No	MX	N1	T3		A774			YES
TCGA-US-A774-11A	YES	76	Social Drinker			330.58.0	Nationwide Children's Hospital			TCGA-US-A774	22			0		YES	78D42429-D038-4B0E-939A-FF9BCB94CEB7				Four Tier		NO	NO	No		YES		Tumor resection		17	4	12		G3	2	0	4.65	No	MX	N1	T3		A774			YES
TCGA-F2-7273-01A	YES	54				195.65.0	Nationwide Children's Hospital	TCGA-F2-7273-F32749	CA96DF04-F35E-48DD-9EDE-01BBA85778BF	TCGA-F2-7273	22	11		0		NO	BEC59CFA-3EA8-4A71-8049-C8AC031FB77F	Scheduled Follow-up Submission	Stable Disease		Four Tier		NO	NO	No		YES		Tumor resection	NO	32	4.2	12	6	G3	3			No	M0	N1	T3		7273	WITH TUMOR	YES	YES	Progressive Disease	YES
TCGA-HZ-A4BH-01A	YES	75				284.63.0	Nationwide Children's Hospital	TCGA-HZ-A4BH-F61506	496E040B-2B3F-4E2C-BC8E-B037509A0416	TCGA-HZ-A4BH	22	30		0			558B2904-610B-454E-86B8-F36895F8F4D6	Scheduled Follow-up Submission			Four Tier				No		YES		Cytology (e.g. Peritoneal or pleural fluid)	YES	10	2.5	12	6	G3	4			No	MX	N1b	T3		A4BH	WITH TUMOR		YES
TCGA-2J-AABH-01A	YES	61				424.46.0	Nationwide Children's Hospital	TCGA-2J-AABH-F62437	865AB429-2D98-40CF-88E1-B44E37329ECB	TCGA-2J-AABH	22	16		0		YES	E89064A8-0D3D-42DB-8149-B4DA717B6AE3	Scheduled Follow-up Submission	Complete Remission/Response		Four Tier	Invasive adenocarcinoma	NO	NO	No		YES		Tumor resection	NO	8	2.2	12	7	G3	0	0		No	M0	N0	T3		AABH	TUMOR FREE	YES	YES	Complete Remission/Response	NO
TCGA-2J-AABP-01A	YES	58	Weekly Drinker	1		424.46.0	Nationwide Children's Hospital	TCGA-2J-AABP-F62448	DFD0C171-D247-4836-8AAF-9F325D140B2A	TCGA-2J-AABP	22	16		0		YES	37F0E6DC-350F-4897-B401-BD766F641508	Scheduled Follow-up Submission		3	Four Tier		NO	NO	No		YES		Tumor resection	NO	22	7.2	12	7	G4	1	0		No	M0	N1	T3		AABP	TUMOR FREE	YES	YES	Complete Remission/Response	NO
TCGA-2L-AAQL-01A	YES	82	Daily Drinker	3		392.50.0	Nationwide Children's Hospital	TCGA-2L-AAQL-F62941	5BC4708E-27FF-43F0-B32A-C1F368D512A2	TCGA-2L-AAQL	22	29		0		NO	B507E974-1E87-49EE-83E2-4FA8B7C72D36	Scheduled Follow-up Submission	Progressive Disease	7	Three Tier		NO	NO	No		YES		Tumor resection	NO	43	4	12	7	G3	3			No	MX	N1	T3	Pancreatic Cancer	AAQL	WITH TUMOR	NO	YES	Progressive Disease	NO
TCGA-2L-AAQL-11A	YES	82	Daily Drinker	3		392.50.0	Nationwide Children's Hospital	TCGA-2L-AAQL-F62941	5BC4708E-27FF-43F0-B32A-C1F368D512A2	TCGA-2L-AAQL	22	29		0		NO	B507E974-1E87-49EE-83E2-4FA8B7C72D36	Scheduled Follow-up Submission	Progressive Disease	7	Three Tier		NO	NO	No		YES		Tumor resection	NO	43	4	12	7	G3	3			No	MX	N1	T3	Pancreatic Cancer	AAQL	WITH TUMOR	NO	YES	Progressive Disease	NO
TCGA-LB-A9Q5-01A	YES	63	None			410.47.0	Nationwide Children's Hospital	TCGA-LB-A9Q5-F67129	F4460447-A57B-4412-8909-EEF8715E5FBB	TCGA-LB-A9Q5	22	31		0		YES	88FE61FD-ED6F-4A5F-828C-B41047BAE4E3	Scheduled Follow-up Submission	Progressive Disease		Three Tier		NO	NO	No		YES		Tumor resection	NO	12	3	12	10	G3	3		0.3	No	MX	N1	T3	Pancreatic Cancer	A9Q5	WITH TUMOR	YES	YES		YES
TCGA-2J-AABT-01A	YES	72	Social Drinker	1		424.46.0	Nationwide Children's Hospital	TCGA-2J-AABT-F62443	041711A0-4987-489F-8004-828949041260	TCGA-2J-AABT	22	16	-79	0	-80	NO	917096E5-4021-4DCC-90DB-317D63FCD84F	Scheduled Follow-up Submission		0.5	Four Tier		YES	YES	No		YES		Tumor resection	NO	21	4.5	12	7	G2	1	0		Yes, History of Prior Malignancy	M0	N1	T3		AABT		YES	YES
TCGA-2J-AAB1-01A	YES	65	Weekly Drinker	1		424.46.0	Nationwide Children's Hospital			TCGA-2J-AAB1	22			0		NO	2E4741AF-E7DE-446D-B126-76C4672829F4			3	Four Tier	invasive adenocarcinoma	NO	NO	No		YES		Tumor resection		22	4.5	12		G3	7	0	25	No	M0	N1	T3		AAB1			YES
TCGA-FB-A5VM-01A	YES	74	Occasional Drinker			330.58.0	Nationwide Children's Hospital	TCGA-FB-A5VM-F56657	DA1BB42A-1C69-459B-A633-309E59E5C59C	TCGA-FB-A5VM	22	24		0		NO	46C24407-8E09-46CE-896B-A9E9C8D21379	Scheduled Follow-up Submission	Progressive Disease	1	Three Tier		NO	YES	No		YES		Tumor resection	NO	35	4.5	12	2	G3	0		24	No	M0	N0	T2		A5VM	WITH TUMOR	YES	YES	Progressive Disease	NO
TCGA-IB-AAUN-01A	YES	74	None			392.50.0	Nationwide Children's Hospital	TCGA-IB-AAUN-F65774	05E41011-CD4A-47A5-9D8D-C3C70290B96C	TCGA-IB-AAUN	22	30		0		YES	F948AB56-0143-441D-968D-6C204520A661	Scheduled Follow-up Submission					NO	NO	No		YES		Tumor resection	NO	15	2.3	12	9	G2	0			No	M0	N0	T2		AAUN		NO	YES	Complete Remission/Response	NO
TCGA-FB-AAQ3-01A	YES	65	None			424.46.0	Nationwide Children's Hospital			TCGA-FB-AAQ3	22			0		YES	06182D34-61F0-452C-9531-E32F6DD8830E				Four Tier		NO	NO	No		YES		Tumor resection		23	2.5	12		G2	1			No	MX	N1	T3		AAQ3			YES
TCGA-FB-AAQ3-11A	YES	65	None			424.46.0	Nationwide Children's Hospital			TCGA-FB-AAQ3	22			0		YES	06182D34-61F0-452C-9531-E32F6DD8830E				Four Tier		NO	NO	No		YES		Tumor resection		23	2.5	12		G2	1			No	MX	N1	T3		AAQ3			YES
TCGA-IB-7888-01A	YES	66				195.65.0	Nationwide Children's Hospital	TCGA-IB-7888-F43043	FCD30BAE-AED8-42AD-B560-38E06B2DC21F	TCGA-IB-7888	22	9		0			E2FC1DD6-0B4D-409D-9D1C-0F8E0ADB6113	Scheduled Follow-up Submission					NO	NO	No		YES		Cytology (e.g. Peritoneal or pleural fluid)	NO	12	3	12	5	G2	0			No	M0	N0	T3	Pancreatic Cancer	7888	WITH TUMOR	YES	YES	Stable Disease	NO
TCGA-HZ-7922-01A	YES	61				195.65.0	Nationwide Children's Hospital			TCGA-HZ-7922	22			0			9534610E-0F62-4424-AB8A-A4B953BD574F				Four Tier				No		YES		Tumor resection		15	3	12		G1	3			No	MX	N1	T3		7922			YES
TCGA-FB-AAQ0-01A	YES	68				424.46.0	Nationwide Children's Hospital	TCGA-FB-AAQ0-F64882	94F77435-0AF0-497D-9213-12FED827E67E	TCGA-FB-AAQ0	22	15	20	0		YES	0EFF96AA-E804-462A-8B8C-049480A09257	Scheduled Follow-up Submission	Complete Remission/Response		Four Tier		NO	YES	No		YES		Tumor resection	NO	18	2.7	12	9	G3	0			No	MX	N0	T3		AAQ0	TUMOR FREE	NO	YES	Complete Remission/Response	NO
TCGA-FB-AAQ0-11A	YES	68				424.46.0	Nationwide Children's Hospital	TCGA-FB-AAQ0-F64882	94F77435-0AF0-497D-9213-12FED827E67E	TCGA-FB-AAQ0	22	15	20	0		YES	0EFF96AA-E804-462A-8B8C-049480A09257	Scheduled Follow-up Submission	Complete Remission/Response		Four Tier		NO	YES	No		YES		Tumor resection	NO	18	2.7	12	9	G3	0			No	MX	N0	T3		AAQ0	TUMOR FREE	NO	YES	Complete Remission/Response	NO
TCGA-HZ-8001-01A	YES	69				210.65.0	Nationwide Children's Hospital	TCGA-HZ-8001-F57841	FC6E1FBE-6953-4C06-927A-103AFED97171	TCGA-HZ-8001	22	27		0			BA3994A1-BB93-4B9B-9CAB-4C84543951B2	Scheduled Follow-up Submission							No		YES			NO	16	3	12	3	G2	0			No	MX	N0	T4		8001	TUMOR FREE	YES	YES	Complete Remission/Response	NO
TCGA-2J-AABO-01A	YES	43				424.46.0	Nationwide Children's Hospital	TCGA-2J-AABO-F62447	C62B29B5-A9D0-4088-BF75-1FE5487351C2	TCGA-2J-AABO	22	16		0		YES	E2DFE5C0-3458-441A-AE03-E65BA0ED212B	Scheduled Follow-up Submission			Four Tier		NO	NO	No		YES		Tumor resection	NO	16	4.6	12	7	G2	8	0	7.5	No	M0	N1	T3		AABO	WITH TUMOR	YES	YES	Progressive Disease	YES
TCGA-H6-8124-01A	YES	56	Occasional Drinker			247.64.0	Nationwide Children's Hospital	TCGA-H6-8124-F38913	B752C84C-40AB-42EF-B079-CC8AFD0E1FCF	TCGA-H6-8124	22	3		0		YES	E4479D25-BB31-4A85-979D-5FA30688B336	Scheduled Follow-up Submission			Three Tier		NO	NO	No		YES		Tumor resection	NO	9	3	12	1	G3	2	0	3.5	No	M0	N1	T3		8124	WITH TUMOR	YES	YES	Complete Remission/Response	YES
TCGA-H6-8124-11A	YES	56	Occasional Drinker			247.64.0	Nationwide Children's Hospital	TCGA-H6-8124-F38913	B752C84C-40AB-42EF-B079-CC8AFD0E1FCF	TCGA-H6-8124	22	3		0		YES	E4479D25-BB31-4A85-979D-5FA30688B336	Scheduled Follow-up Submission			Three Tier		NO	NO	No		YES		Tumor resection	NO	9	3	12	1	G3	2	0	3.5	No	M0	N1	T3		8124	WITH TUMOR	YES	YES	Complete Remission/Response	YES
TCGA-2L-AAQA-01A	YES	76	None			392.50.0	Nationwide Children's Hospital	TCGA-2L-AAQA-F60248	73CFA919-D09B-4130-BBB4-E9BA363F090A	TCGA-2L-AAQA	22	11		0			451D817C-55E0-4C91-BC2C-84698D3940B9	Scheduled Follow-up Submission	Progressive Disease		Three Tier		NO	NO	No		YES		Tumor resection	NO	21	12	12	6	G2	6		30	No	MX	N1	T3	Pancreatic Cancer	AAQA	WITH TUMOR	YES	YES	Progressive Disease	NO
TCGA-2L-AAQA-11A	YES	76	None			392.50.0	Nationwide Children's Hospital	TCGA-2L-AAQA-F60248	73CFA919-D09B-4130-BBB4-E9BA363F090A	TCGA-2L-AAQA	22	11		0			451D817C-55E0-4C91-BC2C-84698D3940B9	Scheduled Follow-up Submission	Progressive Disease		Three Tier		NO	NO	No		YES		Tumor resection	NO	21	12	12	6	G2	6		30	No	MX	N1	T3	Pancreatic Cancer	AAQA	WITH TUMOR	YES	YES	Progressive Disease	NO
TCGA-HZ-8005-01A	YES	81			Head & Body of Pancreas	210.65.0	Nationwide Children's Hospital	TCGA-HZ-8005-F60087	0F1DDE93-9CBE-40D2-9BAD-69FEDB95163D	TCGA-HZ-8005	22	29		0			A814515D-BA5B-4B43-A387-EFC0C5221CB8	Scheduled Follow-up Submission	Progressive Disease						No		YES		Tumor resection	NO	24	4.5	12	5	G3	8			No	MX	N1	T3	Pancreatic Cancer	8005	WITH TUMOR	NO	YES	Progressive Disease	NO
TCGA-IB-AAUO-01A	YES	64	Social Drinker			392.50.0	Nationwide Children's Hospital	TCGA-IB-AAUO-F60095	4ED6FE9E-688B-417D-8EBC-7C940EF7173D	TCGA-IB-AAUO	22	8		0		NO	D1BA9021-3B22-4B25-A357-C45C04BBDAC5	Additional New Tumor Event	Progressive Disease				NO	NO	No		YES		Tumor resection	NO	5	2.7	12	7	G3	5			No	M0	N1	T3		AAUO	WITH TUMOR	NO	YES	Partial Remission/Response	NO
TCGA-HV-AA8V-01A	YES	50	Weekly Drinker			424.46.0	Nationwide Children's Hospital	TCGA-HV-AA8V-F72240	A8B5D672-B620-46F4-9427-B60630792D5D	TCGA-HV-AA8V	22	30		0			BCDA66DD-4D7A-4CD5-8808-08EF5FA1766D		Stable Disease		Three Tier		NO	NO	No	Radical pancreaticoduodenectomy	YES		Tumor resection	NO	20		12	4	G3	3		60	No	MX	N1	T3		AA8V		YES	YES		NO
TCGA-HZ-A49I-01A	YES	77				284.63.0	Nationwide Children's Hospital	TCGA-HZ-A49I-F60078	F0CA2A19-8345-4490-BCA7-6F847CC73EFA	TCGA-HZ-A49I	22	29		0			003B032E-9C21-4D67-908B-C30C05988284	Scheduled Follow-up Submission	Progressive Disease		Four Tier				No		YES		Tumor resection	NO	9	5	12	5	G2	3			No	MX	N1	T3	Pancreatic Cancer	A49I	WITH TUMOR	YES	YES	Progressive Disease	YES
TCGA-HV-A7OL-01A	YES	70	Daily Drinker			349.58.0	Nationwide Children's Hospital	TCGA-HV-A7OL-F72246	3A36C9AE-813C-4104-998A-CE490B148757	TCGA-HV-A7OL	22	30		0			EC7AB077-601A-4571-9152-361592CBA259		Stable Disease		Three Tier		NO	YES	No	Radical pancreaticoduodenectomy	YES		Tumor resection	YES			12	4	G2				No	MX	N0	T3		A7OL		NO	NO	Stable Disease	NO
TCGA-F2-A8YN-01A	YES	76	Occasional Drinker			390.52.0	Nationwide Children's Hospital	TCGA-F2-A8YN-F70058	78B8A225-9316-4CC8-8361-55C06C540FE2	TCGA-F2-A8YN	22	26		0		YES	EA40456F-F580-4EAC-BB3B-BF4B81D72E4A	Scheduled Follow-up Submission	Stable Disease				NO	YES	No		YES		Tissue Biopsy	NO	13	4.8	12	1	G2	0		60	No	M0	N0	T3		A8YN	WITH TUMOR	YES	YES	Progressive Disease	NO
TCGA-IB-8127-01A	YES	59				247.64.0	Nationwide Children's Hospital	TCGA-IB-8127-F43013	288E29BA-BFFD-401E-8F5D-241202505C6A	TCGA-IB-8127	22	8		0		NO	E734B439-0AFF-41B5-B25D-EAC35E3621FC	Scheduled Follow-up Submission	Progressive Disease				NO	NO	No		YES		Tumor resection	NO	24	4.5	12	5	G2	3		40	No	M0	N1	T3		8127	WITH TUMOR	YES	YES	Complete Remission/Response	NO
TCGA-H8-A6C1-01A	YES	53	Occasional Drinker			330.58.0	Nationwide Children's Hospital	TCGA-H8-A6C1-F63940	02DC0234-99FC-48FC-B125-6C56AFBBF715	TCGA-H8-A6C1	22	21		0		YES	F4E62328-7281-4F4B-841F-F42EF112D1F7	Scheduled Follow-up Submission			Three Tier	not specified	NO	NO	No		YES		Cytology (e.g. Peritoneal or pleural fluid)	NO	21	3.1	12	8	G2	0	0	30	No	MX	N0	T3		A6C1	WITH TUMOR	YES	YES	Complete Remission/Response	NO
TCGA-IB-7893-01A	YES	64	Social Drinker			210.65.0	Nationwide Children's Hospital	TCGA-IB-7893-F45059	68275327-422C-40BB-A7B2-81788AFED82B	TCGA-IB-7893	22	3	-38	0		YES	40A76730-988D-4FF1-A17A-91AA85DD7C76	Scheduled Follow-up Submission					NO	YES	No		YES		Tumor resection	NO	8	7	12	7	G3	0			No	M0	N0	T3	Pancreatic Cancer	7893	WITH TUMOR	NO	YES		NO
TCGA-HZ-A49H-01A	YES	68				284.63.0	Nationwide Children's Hospital	TCGA-HZ-A49H-F57839	9A7AC6CA-1897-43C5-960C-1358BE4E16C7	TCGA-HZ-A49H	22	27		0			6E1C25E7-E7E3-4F66-94C6-AFFD3F4373A4	Scheduled Follow-up Submission			Four Tier				No		YES		Cytology (e.g. Peritoneal or pleural fluid)	NO	44	2.8	12	3	G2	1			No	MX	N1	T3		A49H	TUMOR FREE	YES	YES	Complete Remission/Response	NO
TCGA-3A-A9I7-01A	YES	45				392.50.0	Nationwide Children's Hospital	TCGA-3A-A9I7-F69130	AE812446-C2E3-42BA-949D-E4D14FAE4880	TCGA-3A-A9I7	22	29		0		NO	DD1C07B7-7AF7-44F4-A317-35EBB5C58192	Scheduled Follow-up Submission					NO	NO	No		YES		Tissue Biopsy	NO	28		12	12	G2	2	0		No	MX	N1	T3		A9I7	WITH TUMOR		YES
TCGA-HV-AA8X-01A	YES	75				410.47.0	Nationwide Children's Hospital	TCGA-HV-AA8X-F72248	C604AFD9-A9AB-4193-A8C7-0AC6A190C754	TCGA-HV-AA8X	22	30		0			C3E8B2D7-D207-42A9-9D06-0533E992C39D		Stable Disease		Three Tier		NO	NO	No		YES		Tumor resection		11		12	4	G2	3			No	MX	N1	T2		AA8X	WITH TUMOR	YES	YES	Stable Disease	NO
TCGA-FB-A4P6-01A	YES	54	None			284.63.0	Nationwide Children's Hospital	TCGA-FB-A4P6-F46555	1D92DDFF-70B9-4C81-A791-FB3C8562865F	TCGA-FB-A4P6	22	8		0		NO	BE3906E5-B374-40BF-B6E2-06FC924232D1	Scheduled Follow-up Submission					NO	NO	No		YES		Tumor resection	NO	46	4.5	12	8	G1	1		25	No	MX	N1	T3		A4P6	TUMOR FREE	YES	YES		YES
TCGA-HZ-8315-01A	YES	54				247.64.0	Nationwide Children's Hospital	TCGA-HZ-8315-F66195	4911F624-F50C-4C95-BE4D-FE58DE396240	TCGA-HZ-8315	22	3		0			0D7B23AC-0988-4E95-9AF3-82180A1DAB0A	Scheduled Follow-up Submission	Progressive Disease		Four Tier				No		YES	Fine Needle Aspiration Biopsy	Other method, specify:	NO	21	6	12	10	G2	0			No	MX	N0	T3	Pancreatic Cancer	8315	WITH TUMOR	YES	YES
TCGA-3A-A9IB-01A	YES	69				410.47.0	Nationwide Children's Hospital			TCGA-3A-A9IB	22			0	1	NO	AF03B49D-356D-4C3D-A899-0C15283D3B18						YES	YES	No		YES		Tissue Biopsy		21	4	12		G3	5	0	5	No	MX	N1	T3		A9IB			YES
TCGA-HZ-A4BK-01A	YES	72				284.63.0	Nationwide Children's Hospital	TCGA-HZ-A4BK-F60088	1583FBD3-96D7-4539-84C8-58071CCD8193	TCGA-HZ-A4BK	22	29		0			20D34C7F-672C-4808-9BB2-E92FA9BD66F5	Scheduled Follow-up Submission	Progressive Disease		Four Tier	Adenocarcinoma, NOS			No		YES		Cytology (e.g. Peritoneal or pleural fluid)	NO	4	4.7	12	5	G3	2			Yes, History of Prior Malignancy	MX	N1	T3		A4BK	WITH TUMOR	YES	YES	Progressive Disease	YES
TCGA-FB-AAPP-01A	YES	71	Social Drinker			424.46.0	Nationwide Children's Hospital	TCGA-FB-AAPP-F64867	6ADEE0D7-CD8E-4F17-91B4-1E383CDC3A1B	TCGA-FB-AAPP	22	15		0		YES	20E66DC2-9B38-429B-8713-6BB7943EEC76	Scheduled Follow-up Submission	Progressive Disease				NO	NO	No		YES		Tissue Biopsy	NO	7	5.5	12	9	G3	3			No	MX	N1	T3	Pancreatic Cancer	AAPP	WITH TUMOR	YES	YES	Progressive Disease	YES
TCGA-FB-AAPP-11A	YES	71	Social Drinker			424.46.0	Nationwide Children's Hospital	TCGA-FB-AAPP-F64867	6ADEE0D7-CD8E-4F17-91B4-1E383CDC3A1B	TCGA-FB-AAPP	22	15		0		YES	20E66DC2-9B38-429B-8713-6BB7943EEC76	Scheduled Follow-up Submission	Progressive Disease				NO	NO	No		YES		Tissue Biopsy	NO	7	5.5	12	9	G3	3			No	MX	N1	T3	Pancreatic Cancer	AAPP	WITH TUMOR	YES	YES	Progressive Disease	YES
TCGA-3E-AAAY-01A	YES	67	None		Head and body	392.50.0	Nationwide Children's Hospital	TCGA-3E-AAAY-F68046	8656E849-8B63-4253-ADDD-43CF7E7EF50E	TCGA-3E-AAAY	22	13		0			ADCDF7C8-7C45-4BC9-B40D-C01FD36F53E7	Scheduled Follow-up Submission					NO	NO	No	Pancreatoduodenectomy	YES		Tumor resection	NO	23	3	12	11	G3	5			No	MX	N1	T3		AAAY		YES	YES	Complete Remission/Response	NO
TCGA-HZ-A77O-01A	YES	77				349.58.0	Nationwide Children's Hospital	TCGA-HZ-A77O-F64068	BFD91939-306F-420D-B1F0-BBB4451FEF4F	TCGA-HZ-A77O	22	25		0		NO	50C6AC3F-5E10-4C59-B697-9303F31F4EFF	Scheduled Follow-up Submission	Progressive Disease		Four Tier		NO	NO	No		YES		Cytology (e.g. Peritoneal or pleural fluid)	NO	26	2.8	12	8	G2	4			No	MX	N1	T2	Pancreatic Cancer	A77O	WITH TUMOR	NO	YES	Complete Remission/Response	NO
TCGA-FB-AAPS-01A	YES	62				410.47.0	Nationwide Children's Hospital	TCGA-FB-AAPS-F64863	E9FE3130-A370-435E-97D5-C95BEFCA9786	TCGA-FB-AAPS	22	18		0			9043D7F1-EDAE-417D-AB38-6F7A2F6D4472	Scheduled Follow-up Submission			Three Tier		NO	NO	No		YES		Tumor resection	YES	7	3	12	9	G2	1		10	No	MX	N1	T2		AAPS			YES		YES
TCGA-FB-AAPS-11A	YES	62				410.47.0	Nationwide Children's Hospital	TCGA-FB-AAPS-F64863	E9FE3130-A370-435E-97D5-C95BEFCA9786	TCGA-FB-AAPS	22	18		0			9043D7F1-EDAE-417D-AB38-6F7A2F6D4472	Scheduled Follow-up Submission			Three Tier		NO	NO	No		YES		Tumor resection	YES	7	3	12	9	G2	1		10	No	MX	N1	T2		AAPS			YES		YES
TCGA-HZ-8003-01A	YES	65				210.65.0	Nationwide Children's Hospital	TCGA-HZ-8003-F65860	9327E8C6-49A4-44B1-B93C-50CB26448697	TCGA-HZ-8003	22	30		0			7B94066C-A350-4915-AA59-5AEB67846C69	Scheduled Follow-up Submission	Progressive Disease						No		YES			NO	12	2.8	12	9	G2	1			No	MX	N1	T3	Pancreatic Cancer	8003	WITH TUMOR	YES	YES	Complete Remission/Response	NO
TCGA-3A-A9IS-01A	YES	67				410.47.0	Nationwide Children's Hospital	TCGA-3A-A9IS-F69136	44E576CE-3916-45D5-AECE-A46DAB3EA8B7	TCGA-3A-A9IS	22	29		0		NO	F7F7BAC5-FB08-4C66-AEC8-D925761C64BA	Scheduled Follow-up Submission			Four Tier	82463 NEUROENDOCRINE CARCINOMA NOS	NO	NO	No		YES		Tissue Biopsy	YES	32	8	12	12	G1	0	0		No	MX	N0	T2		A9IS			YES
TCGA-IB-7890-01A	YES	73	Occasional Drinker			210.65.0	Nationwide Children's Hospital	TCGA-IB-7890-F45062	8753A1B6-227F-4353-BD15-794096D1F324	TCGA-IB-7890	22	3		0			DF91C3E4-798D-4694-8C1C-AEA2FDBFE3BF	Scheduled Follow-up Submission					NO	NO	No		YES		Tumor resection	NO	11	2.8	12	7	G3	0			No	M0	N0	T2	Pancreatic Cancer	7890	WITH TUMOR	NO	YES		NO
TCGA-3A-A9I5-01A	YES	57			Duct	392.50.0	Nationwide Children's Hospital	TCGA-3A-A9I5-F69246	DC03466A-799B-495B-81C6-FC36D242A8E6	TCGA-3A-A9I5	22	31		0		YES	D72F04F6-09DA-42F7-B508-C483647E2F14	Scheduled Follow-up Submission	Complete Remission/Response		Four Tier		NO	NO	No		YES		Tissue Biopsy	NO	13	3	12	12	G1	0	0		Yes, History of Prior Malignancy	MX	N0			A9I5	TUMOR FREE	YES	YES	Complete Remission/Response	YES
TCGA-FB-A545-01A	YES	72				284.63.0	Nationwide Children's Hospital	TCGA-FB-A545-F50064	444901D2-A145-4377-BFF0-3475041105B7	TCGA-FB-A545	22	15		0		YES	FCA25AC2-18D6-4D71-B368-74F32AF3763C	Scheduled Follow-up Submission	Progressive Disease		Four Tier			NO	No		YES		Tumor resection	NO	28		12	10	G2	4			No	M0	N1	T3		A545	WITH TUMOR	YES	YES	Complete Remission/Response	YES
TCGA-HZ-7918-01A	YES	72				195.65.0	Nationwide Children's Hospital	TCGA-HZ-7918-F65858	FE2857EC-5193-460D-A140-E1A434727C34	TCGA-HZ-7918	22	30		0			1AC456CD-1CD2-4220-85F1-62C8EC07F1E2	Scheduled Follow-up Submission	Stable Disease						No		YES		Cytology (e.g. Peritoneal or pleural fluid)	NO	22	5.5	12	9	G3	11			No	M0	N1	T3		7918	WITH TUMOR	YES	YES	Complete Remission/Response	YES
TCGA-2J-AAB9-01A	YES	70	Weekly Drinker	1		424.46.0	Nationwide Children's Hospital			TCGA-2J-AAB9	22			0		YES	2DA881E5-585F-4577-ADE2-29D485819AAA			3	Four Tier		NO	NO	No		YES		Tumor resection		37	4	12		G1	6	0		No	M0	N1	T3		AAB9			YES
TCGA-3A-A9IH-01A	YES	66	Daily Drinker	1		410.47.0	Nationwide Children's Hospital	TCGA-3A-A9IH-F69250	92FB5C94-880B-4676-A495-5FA242361FA1	TCGA-3A-A9IH	22	31		0		NO	FAB6DFFB-610D-4A03-A4C8-75C633132314	Scheduled Follow-up Submission	Stable Disease	7			YES	NO	No	Subtotal pancreatectomy and splenectomy and cholecystectomy	YES		Tissue Biopsy	NO	8	2	12	12	G2	0	0		No	MX	N0	T1		A9IH	WITH TUMOR	YES	YES		NO
TCGA-FB-AAQ6-01A	YES	85	None			424.46.0	Nationwide Children's Hospital	TCGA-FB-AAQ6-F64899	B1DE6968-E2F8-49C3-962B-F58A555842F4	TCGA-FB-AAQ6	22	15		0			A7FA6D3F-3B54-429F-904E-BD9B16A18132	Scheduled Follow-up Submission	Progressive Disease		Four Tier		NO	NO	No		YES		Tissue Biopsy	NO	9	2	12	9	G2	0			Yes, History of Prior Malignancy	MX	N0	T1	Pancreatic Cancer	AAQ6	WITH TUMOR	YES	YES	Progressive Disease	NO
TCGA-FB-AAQ6-11A	YES	85	None			424.46.0	Nationwide Children's Hospital	TCGA-FB-AAQ6-F64899	B1DE6968-E2F8-49C3-962B-F58A555842F4	TCGA-FB-AAQ6	22	15		0			A7FA6D3F-3B54-429F-904E-BD9B16A18132	Scheduled Follow-up Submission	Progressive Disease		Four Tier		NO	NO	No		YES		Tissue Biopsy	NO	9	2	12	9	G2	0			Yes, History of Prior Malignancy	MX	N0	T1	Pancreatic Cancer	AAQ6	WITH TUMOR	YES	YES	Progressive Disease	NO
TCGA-HZ-8002-01A	YES	61				210.65.0	Nationwide Children's Hospital	TCGA-HZ-8002-F65861	8BC11CC9-6A11-4D10-886E-F6C8ED94C7FB	TCGA-HZ-8002	22	30		0			194AC703-DAE0-4A90-9D34-6755B9F1ACBD	Scheduled Follow-up Submission							No		YES			NO	33	3.1	12	9	G2	4			No	MX	N1	T3		8002	WITH TUMOR	YES	YES		NO
TCGA-2L-AAQM-01A	YES	52	Daily Drinker	4	Panreatic body and tail, spread to stomach	410.47.0	Nationwide Children's Hospital	TCGA-2L-AAQM-F62942	3C75FC7A-BE20-4D6C-A5F5-279673E01B4C	TCGA-2L-AAQM	22	29		0			2483C414-B1D1-48D1-B976-9C40C8893992	Scheduled Follow-up Submission	Complete Remission/Response	7	Three Tier	Neuroendocrine	NO		No		YES		Tumor resection	NO	57	14	12	7	G1	16			No	MX	N1	T3		AAQM	TUMOR FREE	NO	YES	Stable Disease	NO
TCGA-2L-AAQM-11A	YES	52	Daily Drinker	4	Panreatic body and tail, spread to stomach	410.47.0	Nationwide Children's Hospital	TCGA-2L-AAQM-F62942	3C75FC7A-BE20-4D6C-A5F5-279673E01B4C	TCGA-2L-AAQM	22	29		0			2483C414-B1D1-48D1-B976-9C40C8893992	Scheduled Follow-up Submission	Complete Remission/Response	7	Three Tier	Neuroendocrine	NO		No		YES		Tumor resection	NO	57	14	12	7	G1	16			No	MX	N1	T3		AAQM	TUMOR FREE	NO	YES	Stable Disease	NO
TCGA-RB-A7B8-01A	YES	81	None			349.58.0	Nationwide Children's Hospital	TCGA-RB-A7B8-F65034	8D2DF51E-B149-48F1-9C38-F2A22BCEC17D	TCGA-RB-A7B8	22	29		0		YES	9B0A6199-CB07-4D5F-AA9E-CDE4D0A288D3	Scheduled Follow-up Submission	Progressive Disease		Four Tier	ductal and micropapillary	NO	NO	No		YES		Tumor resection	NO	24	2.3	12	10	G2	8	0		No	MX	N1	T3	Pancreatic Cancer	A7B8		YES	YES	Complete Remission/Response	NO
TCGA-HZ-8317-01A	YES	69				247.64.0	Nationwide Children's Hospital	TCGA-HZ-8317-F60074	4698234E-2E69-4586-8841-BF16BC300001	TCGA-HZ-8317	22	29		0			203298D8-D748-4FD1-BE0C-EFC99664B9C9	Scheduled Follow-up Submission	Progressive Disease						No		YES	Fine Needle Aspiration Biopsy	Other method, specify:	NO	13	3.1	12	5	G1	4			No	MX	N1	T3	Pancreatic Cancer	8317	WITH TUMOR	YES	YES	Progressive Disease	YES
TCGA-HZ-8638-01A	YES	84				247.64.0	Nationwide Children's Hospital	TCGA-HZ-8638-F57838	D3F23EF5-FD83-467E-A6BA-28224946311E	TCGA-HZ-8638	22	27		0			EEA568C0-D865-46C3-8C61-788E18108A95	Scheduled Follow-up Submission							No		YES		Tissue Biopsy	NO	12	0.3	12	3	GX	0			No	MX	N0	T1	Surgical Complications	8638	TUMOR FREE	NO	YES	Complete Remission/Response	NO
TCGA-FB-AAQ1-01A	YES	49				424.46.0	Nationwide Children's Hospital	TCGA-FB-AAQ1-F64884	D308001B-F927-47A6-9523-D94DC8C13A53	TCGA-FB-AAQ1	22	18		0			594B9762-556D-406A-B269-16DE2D3E9BFD	Scheduled Follow-up Submission	Partial Remission/Response		Four Tier		NO	NO	No		YES		Tumor resection	NO	27	6	12	9	G2	3			No	MX	N1	T3		AAQ1	WITH TUMOR	NO	YES	Stable Disease	NO
TCGA-FB-AAQ1-11A	YES	49				424.46.0	Nationwide Children's Hospital	TCGA-FB-AAQ1-F64884	D308001B-F927-47A6-9523-D94DC8C13A53	TCGA-FB-AAQ1	22	18		0			594B9762-556D-406A-B269-16DE2D3E9BFD	Scheduled Follow-up Submission	Partial Remission/Response		Four Tier		NO	NO	No		YES		Tumor resection	NO	27	6	12	9	G2	3			No	MX	N1	T3		AAQ1	WITH TUMOR	NO	YES	Stable Disease	NO
TCGA-HZ-7924-01A	YES	60				195.65.0	Nationwide Children's Hospital	TCGA-HZ-7924-F57844	0E580E66-9EFF-4FCF-B15C-B07F5B2CC0BF	TCGA-HZ-7924	22	27		0			17B04EB2-3DB2-4FD6-99D5-F835A3CAC409	Scheduled Follow-up Submission	Progressive Disease						No		YES		Tissue Biopsy	NO	17	5	12	3	G2	0			No	MX	N0	T3		7924	WITH TUMOR	YES	YES	Complete Remission/Response	NO
TCGA-HZ-7923-01A	YES	65				195.65.0	Nationwide Children's Hospital	TCGA-HZ-7923-F65862	01A58AA3-59E1-4072-82B9-E52D47385747	TCGA-HZ-7923	22	30		0			6882EB06-AB7C-413B-BA83-3866F7A595BE	Scheduled Follow-up Submission	Complete Remission/Response						No		YES		Tumor resection	NO	17	3	12	9	G2	0			No	MX	N0	T3		7923	TUMOR FREE	YES	YES	Complete Remission/Response	NO
TCGA-2J-AABK-01A	YES	71			Uncinate process	424.46.0	Nationwide Children's Hospital	TCGA-2J-AABK-F62446	FAB543A3-4959-4A90-A1B6-394CAFE3ED02	TCGA-2J-AABK	22	16		0			05EB6876-15D7-4D39-9E92-A3DE82B313B8	Scheduled Follow-up Submission			Four Tier		NO	NO	No		YES		Tumor resection	NO	19	2.8	12	7	G2	2	0		No	M0	N1	T3		AABK	TUMOR FREE	YES	YES	Complete Remission/Response	YES
TCGA-FZ-5919-01A	YES	59				106.63.0	Nationwide Children's Hospital			TCGA-FZ-5919	22			0		YES	B7C575D3-52B4-42E1-B52B-A62E6F09A915							NO	No		YES		Cytology (e.g. Peritoneal or pleural fluid)		11		12		G3	9			No	MX	N1	T3		5919			YES
TCGA-FZ-5919-11A	YES	59				106.63.0	Nationwide Children's Hospital			TCGA-FZ-5919	22			0		YES	B7C575D3-52B4-42E1-B52B-A62E6F09A915							NO	No		YES		Cytology (e.g. Peritoneal or pleural fluid)		11		12		G3	9			No	MX	N1	T3		5919			YES
TCGA-HZ-8637-01A	YES	76				247.64.0	Nationwide Children's Hospital	TCGA-HZ-8637-F64065	BC6DB975-CE80-4025-AC68-54D027DBC1CA	TCGA-HZ-8637	22	25		0			11BEF3AE-8B8E-43B1-B92A-C9914FAE213C	Scheduled Follow-up Submission	Complete Remission/Response		Four Tier				No		YES		Tumor resection	NO	18	3.4	12	8	G3	1			No	MX	N1	T3	Other, non-malignant disease	8637	TUMOR FREE	YES	YES	Complete Remission/Response	YES
TCGA-US-A776-01A	YES	61	None			349.58.0	Nationwide Children's Hospital	TCGA-US-A776-F55374	E1BE77EA-F4B9-469A-93F9-3B242B08DD03	TCGA-US-A776	22	6		0		NO	E9D1444D-64C6-4CFE-A4AE-B79731B36F1F	Scheduled Follow-up Submission			Four Tier		NO	YES	No		YES		Tumor resection	NO	14	3	12	1	G2	0	0		No	MX	N0	T3		A776	TUMOR FREE	NO	YES	Complete Remission/Response	NO
TCGA-US-A776-11A	YES	61	None			349.58.0	Nationwide Children's Hospital	TCGA-US-A776-F55374	E1BE77EA-F4B9-469A-93F9-3B242B08DD03	TCGA-US-A776	22	6		0		NO	E9D1444D-64C6-4CFE-A4AE-B79731B36F1F	Scheduled Follow-up Submission			Four Tier		NO	YES	No		YES		Tumor resection	NO	14	3	12	1	G2	0	0		No	MX	N0	T3		A776	TUMOR FREE	NO	YES	Complete Remission/Response	NO
TCGA-OE-A75W-01A	YES	75	Daily Drinker	3		330.58.0	Nationwide Children's Hospital	TCGA-OE-A75W-F66432	49EDA785-72B1-4865-8E44-580FD8FD3DDA	TCGA-OE-A75W	22	16		0	-30	YES	DAFEEFCD-584C-45CD-9D86-3500F40CCF52	Scheduled Follow-up Submission	Progressive Disease	7	Four Tier		YES	YES	No		YES		Cytology (e.g. Peritoneal or pleural fluid)	NO	22	4.5	12	10	G1	0	0	30	No	M0	N0	T3		A75W		YES	YES	Progressive Disease	YES
TCGA-IB-7654-01A	YES	80				195.65.0	Nationwide Children's Hospital	TCGA-IB-7654-F45056	3BC01100-30E2-4E10-AEC3-47B75F54107B	TCGA-IB-7654	22	3		0			888CC4C7-B557-43E9-9870-ADE431ADD2B4	Scheduled Follow-up Submission			Three Tier		NO	NO	Yes, Radiation Prior to Resection		YES		Cytology (e.g. Peritoneal or pleural fluid)	NO	3	3	12	7	G2	2			Yes, History of Prior Malignancy	M0	N1	T2	Other malignancy	7654	WITH TUMOR	NO	YES		NO
TCGA-LB-A7SX-01A	YES	74	Daily Drinker			349.58.0	Nationwide Children's Hospital	TCGA-LB-A7SX-F66556	80645A39-B921-4943-A054-9BE8A0677B4A	TCGA-LB-A7SX	22	20		0		YES	D8D3A516-CE80-4AE8-BC9F-EE5357AC147E	Scheduled Follow-up Submission		7			YES	NO	No		YES		Tumor resection	NO	26	2.5	12	10	G2	7	0	40	Yes, History of Prior Malignancy	MX	N1	T3	Other, non-malignant disease	A7SX		YES	YES	Stable Disease	NO
TCGA-3A-A9IU-01A	YES	65	Occasional Drinker			410.47.0	Nationwide Children's Hospital			TCGA-3A-A9IU	22			0		NO	D8A14A5A-14CC-4F74-9208-CD6AA2E2DF11				Four Tier		NO	NO	No		YES		Tissue Biopsy		25	4	12		G3	2	0		No	MX	N1	T3		A9IU			YES
TCGA-US-A77G-01A	YES	64	Daily Drinker	3		330.58.0	Nationwide Children's Hospital			TCGA-US-A77G	22			0			9E7C9D76-2A7A-4C77-B9A3-225809E64896			7	Four Tier		NO	NO	No		YES		Tumor resection		11	2	12		G2	3	0		No	MX	N1	T3		A77G			YES
TCGA-US-A77G-11A	YES	64	Daily Drinker	3		330.58.0	Nationwide Children's Hospital			TCGA-US-A77G	22			0			9E7C9D76-2A7A-4C77-B9A3-225809E64896			7	Four Tier		NO	NO	No		YES		Tumor resection		11	2	12		G2	3	0		No	MX	N1	T3		A77G			YES
TCGA-XD-AAUG-01A	NO	66	Weekly Drinker		distal pancreas	424.46.0	Nationwide Children's Hospital	TCGA-XD-AAUG-F69090	3FA302F2-F045-4C9C-8C38-3D02AD1AF41A	TCGA-XD-AAUG	22	29		0		YES	215A1DE6-F111-41F9-B419-E64094B72809	Scheduled Follow-up Submission							No	Near total pancreatomy with splenectomy, duodenum perserving	YES		Tumor resection	NO	12	3.2	12	12	G2	1	0		No	M1	N1	T3		AAUG	TUMOR FREE	YES	YES		NO
TCGA-IB-A5ST-01A	YES	64				330.58.0	Nationwide Children's Hospital	TCGA-IB-A5ST-F62654	B4335C26-15D3-45F0-8098-5F78FDD1EB2E	TCGA-IB-A5ST	22	23		0		YES	4884CD9D-D4E9-4293-A5A4-E26738DE8AE8	Scheduled Follow-up Submission	Complete Remission/Response				NO	NO	No		YES		Tumor resection	NO	16	3.2	12	7	G2	2			No	M0	N1	T3		A5ST	TUMOR FREE	NO	YES	Complete Remission/Response	NO
TCGA-XD-AAUL-01A	YES	56	None			410.47.0	Nationwide Children's Hospital	TCGA-XD-AAUL-F69140	C4825674-6AE9-42C9-8B97-45377DDABC00	TCGA-XD-AAUL	22	29		0	-418	NO	BA672136-D4EA-429E-9AA5-2227452425BD	Scheduled Follow-up Submission					YES	NO	No		YES	endoscopic ultrasound-guided fine needle aspiration	Other method, specify:	NO	21	2	12	12	G2	0		30	Yes, History of Prior Malignancy	MX	N0	T3		AAUL	TUMOR FREE	YES	YES	Complete Remission/Response	NO
TCGA-IB-A7M4-01A	YES	81	Daily Drinker	1		369.54.0	Nationwide Children's Hospital	TCGA-IB-A7M4-F65773	4F426801-5263-4441-AF01-8D73F2F8E912	TCGA-IB-A7M4	22	30		0		YES	B701A34A-7830-4EDF-9828-079528A55BD0	Scheduled Follow-up Submission	Complete Remission/Response	7			NO	NO	No		YES		Tumor resection	NO	16		12	9	G3	1		52	No	MX	N1	T3		A7M4	TUMOR FREE	NO	YES	Complete Remission/Response	NO
TCGA-3A-A9IX-01A	YES	40	Social Drinker			424.46.0	Nationwide Children's Hospital	TCGA-3A-A9IX-F69258	6021A60E-6672-419A-9FD9-4C35BD3CD48A	TCGA-3A-A9IX	22	31	-50	0		NO	12D402FF-5747-479F-9A95-DA9920D563A4	Scheduled Follow-up Submission	Complete Remission/Response		Four Tier		NO	YES	No		YES		Tissue Biopsy	NO	35	2	12	12	G2	0	0	2.3	No	MX	N0	T1		A9IX	TUMOR FREE	YES	YES	Complete Remission/Response	YES
TCGA-IB-7887-01A	YES	62				195.65.0	Nationwide Children's Hospital	TCGA-IB-7887-F43024	C0405786-E8CA-4998-BAC4-5454754254BF	TCGA-IB-7887	22	8		0		YES	E127DE1D-0E07-4776-8BFC-7F5BF47EDB6D	Scheduled Follow-up Submission					NO	NO	No		YES		Tumor resection	NO	8	5.5	12	5	G2	3		20	No	M0	N1	T3	Pancreatic Cancer	7887		NO	YES		NO
TCGA-IB-7647-01A	YES	41	Occasional Drinker			195.65.0	Nationwide Children's Hospital	TCGA-IB-7647-F44987	AE228A12-9C0E-4CE1-B477-BD40E854CF74	TCGA-IB-7647	22	2		0		YES	BEE933DD-9F0B-4D10-AC05-E42ACF1C29ED	Scheduled Follow-up Submission					NO	NO	No		YES		Cytology (e.g. Peritoneal or pleural fluid)	NO	20	6	12	7	G2	14			No	M0	N1	T3	Pancreatic Cancer	7647	WITH TUMOR	YES	YES	Progressive Disease	NO
TCGA-2L-AAQJ-01A	YES	49	None			410.47.0	Nationwide Children's Hospital	TCGA-2L-AAQJ-F62940	375CA083-DB09-4655-BBED-37A3564CF1B8	TCGA-2L-AAQJ	22	29		0			430CF821-EDD7-457B-BF8D-CA029176F0BE	Scheduled Follow-up Submission	Progressive Disease		Three Tier		NO	NO	No		YES		Tumor resection	NO	21	3	12	7	G2	0			No	MX	N0	T4	Pancreatic Cancer	AAQJ	WITH TUMOR	YES	YES	Progressive Disease	NO
TCGA-2L-AAQJ-11A	YES	49	None			410.47.0	Nationwide Children's Hospital	TCGA-2L-AAQJ-F62940	375CA083-DB09-4655-BBED-37A3564CF1B8	TCGA-2L-AAQJ	22	29		0			430CF821-EDD7-457B-BF8D-CA029176F0BE	Scheduled Follow-up Submission	Progressive Disease		Three Tier		NO	NO	No		YES		Tumor resection	NO	21	3	12	7	G2	0			No	MX	N0	T4	Pancreatic Cancer	AAQJ	WITH TUMOR	YES	YES	Progressive Disease	NO
TCGA-IB-AAUP-01A	YES	68	None			390.52.0	Nationwide Children's Hospital	TCGA-IB-AAUP-F65775	A5CEDB1E-6511-4BAB-931B-F9EEED4372D7	TCGA-IB-AAUP	22	30		0		YES	6331D95F-0237-4815-B3D9-2C6870178444	Scheduled Follow-up Submission	Complete Remission/Response				NO	YES	No	Endoscopic Retrograde Cholangiopancreaticography	YES		Cytology (e.g. Peritoneal or pleural fluid)	NO	21	2.7	12	9	G2	7			No	M0	N1	T3		AAUP	TUMOR FREE	YES	YES	Complete Remission/Response	NO
TCGA-HZ-A8P1-01A	YES	81				390.52.0	Nationwide Children's Hospital			TCGA-HZ-A8P1	22			0		NO	09F3C262-6DDF-447F-9B3C-4BBCB316049C				Four Tier		NO	NO	No	Partial Pancreatectomy	YES		Tumor resection		5	5	12		G1	0		15	No	MX	N0	T2		A8P1			YES
TCGA-FB-A4P5-01A	YES	69				284.63.0	Nationwide Children's Hospital	TCGA-FB-A4P5-F46411	9C319D85-60FE-49AF-A777-FC3846D709B1	TCGA-FB-A4P5	22	7		0		YES	AF1E4307-DBCA-4BF2-B939-2774CB5BE1A2	Scheduled Follow-up Submission					NO	NO	No		YES		Tumor resection	NO	40	4.5	12	8	G2	4		40	No	MX	N1	T3		A4P5	WITH TUMOR	YES	YES
TCGA-IB-A5SO-01A	YES	71				330.58.0	Nationwide Children's Hospital	TCGA-IB-A5SO-F60361	2768E70B-173A-470E-AB7B-0EA39465DD77	TCGA-IB-A5SO	22	23		0		NO	AD3410D7-F0ED-49F0-AEE1-9212160F0BC5	Scheduled Follow-up Submission	Progressive Disease				NO	NO	No		YES		Tumor resection	NO	12	3.8	12	7	G2	3			No	M0	N1	T3	Pancreatic Cancer	A5SO	WITH TUMOR	NO	YES	Progressive Disease	NO
TCGA-2J-AAB8-01A	YES	71				424.46.0	Nationwide Children's Hospital	TCGA-2J-AAB8-F62434	DAF7D897-0ED7-48EC-AE70-080DD8D7D6BD	TCGA-2J-AAB8	22	16		0			A145668C-C4E3-4B36-B704-F4A6FCA987FF	Scheduled Follow-up Submission			Four Tier		NO	NO	No		YES		Tumor resection	NO	27	3.5	12	7	G3	3	0		No	M0	N1	T3		AAB8		YES	YES
TCGA-3A-A9IV-01A	YES	59	Social Drinker			424.46.0	Nationwide Children's Hospital	TCGA-3A-A9IV-F69256	A904C8EE-3348-4AD8-B09C-C0FC6715CC23	TCGA-3A-A9IV	22	31		0		YES	5768E0C3-67B5-4D2A-BD6B-78C27D9FE811	Scheduled Follow-up Submission	Complete Remission/Response		Four Tier	NEUROENDOCRINE CARCINOMA	NO	NO	No	Subtotal Pancreatectomy	YES		Tissue Biopsy	NO	16	3	12	12	G1	0	0		No	MX	N0	T2		A9IV	TUMOR FREE	NO	YES	Complete Remission/Response	NO
TCGA-PZ-A5RE-01A	YES	44				330.58.0	Nationwide Children's Hospital	TCGA-PZ-A5RE-F64041	57327637-97FE-4179-8626-DD32AAA2BC27	TCGA-PZ-A5RE	22	25		0			06831E8B-1D78-4C75-9998-5386EE7E078E	Scheduled Follow-up Submission	Progressive Disease		Four Tier				No		YES		Tumor resection	NO	22	3	12	8	G3	3			No	MX	N1	T3	Pancreatic Cancer	A5RE	WITH TUMOR	YES	YES		YES
TCGA-PZ-A5RE-11A	YES	44				330.58.0	Nationwide Children's Hospital	TCGA-PZ-A5RE-F64041	57327637-97FE-4179-8626-DD32AAA2BC27	TCGA-PZ-A5RE	22	25		0			06831E8B-1D78-4C75-9998-5386EE7E078E	Scheduled Follow-up Submission	Progressive Disease		Four Tier				No		YES		Tumor resection	NO	22	3	12	8	G3	3			No	MX	N1	T3	Pancreatic Cancer	A5RE	WITH TUMOR	YES	YES		YES
TCGA-IB-7886-01A	YES	80	Daily Drinker	2		195.65.0	Nationwide Children's Hospital	TCGA-IB-7886-F45061	9084863B-874B-4ED5-AE67-23D17CC6A7FA	TCGA-IB-7886	22	3		0		NO	6761EDF3-B59C-478D-899B-06312A910394	Scheduled Follow-up Submission		7			NO	NO	No		YES		Tumor resection	NO	11	6	12	7	G3	4		35	No	M0	N1	T3	Other, non-malignant disease	7886	TUMOR FREE	NO	YES		NO
TCGA-IB-A5SQ-01A	YES	56	Occasional Drinker			330.58.0	Nationwide Children's Hospital			TCGA-IB-A5SQ	22			0		YES	52FAA22E-0469-439D-9E44-5ADD13867583						NO	NO	No		YES		Tumor resection		9	2.5	12		G2	0			No	M0	N0	T2		A5SQ			YES
TCGA-Q3-A5QY-01A	YES	58				330.58.0	Nationwide Children's Hospital	TCGA-Q3-A5QY-F56901	0494B314-53DD-4EEB-895C-A6F025A2F72A	TCGA-Q3-A5QY	22	25	-139	0		NO	7FAA57DE-5126-4422-891E-9F5B0602D043	Scheduled Follow-up Submission			Four Tier		NO	YES	No		YES		Tumor resection	NO	18	2.7	12	2	G2	4	0		No	MX	N1	T3		A5QY			YES		NO
TCGA-IB-7649-01A	YES	73				195.65.0	Nationwide Children's Hospital	TCGA-IB-7649-F44988	29997909-E871-4A2F-8150-3ED14A2F5F03	TCGA-IB-7649	22	2		0			6E891C73-C5C1-43D3-AA22-93BEF4814A05	Scheduled Follow-up Submission					NO	NO	No		YES		Cytology (e.g. Peritoneal or pleural fluid)	NO	13	4	12	7	G2	5		57	No	M0	N1	T3		7649		NO	YES	Partial Remission/Response	NO
TCGA-2J-AABU-01A	YES	56	Daily Drinker	1		424.46.0	Nationwide Children's Hospital			TCGA-2J-AABU	22			0		NO	FE774184-FB1D-47BE-821E-D9E3CF987166			7	Four Tier		NO	NO	No		YES		Tumor resection		28	3.3	12		G3	2	0		No	M0	N1	T3		AABU			YES
TCGA-2J-AABE-01A	YES	73	Weekly Drinker	1		424.46.0	Nationwide Children's Hospital	TCGA-2J-AABE-F62445	39F79087-3BCB-492F-8E5A-DC1E909AD01E	TCGA-2J-AABE	22	16	-9	0		NO	7741E9BC-3B1C-40EB-9E62-492E1ECE99C0	Scheduled Follow-up Submission		3	Four Tier		NO	YES	No		YES		Tumor resection	NO	24	5.8	12	7	G2	0	0	2.2	No	M0	N0	T3		AABE	TUMOR FREE	YES	YES	Complete Remission/Response	YES
TCGA-2J-AABR-01A	YES	60			Head & body of pancreas	424.46.0	Nationwide Children's Hospital	TCGA-2J-AABR-F62449	03A20154-E3AB-4363-A4FB-571D8CA811D1	TCGA-2J-AABR	22	16		0			ABD25F5A-FFAA-4E99-98BF-A735CF346835	Scheduled Follow-up Submission			Four Tier		NO	NO	No		YES		Tumor resection	NO	14	3.2	12	7	G3	0	0		Yes, History of Prior Malignancy	M0	N0	T3		AABR	WITH TUMOR	YES	YES	Progressive Disease	NO
TCGA-2L-AAQI-01A	YES	66	None			410.47.0	Nationwide Children's Hospital	TCGA-2L-AAQI-F62939	95C4CD42-A583-48BE-8E17-A0084AD03BF7	TCGA-2L-AAQI	22	29		0	-50	NO	02A3EB69-0290-40F0-8B4D-5CAA9C56F576	Scheduled Follow-up Submission	Progressive Disease		Three Tier		YES		No		YES		Tumor resection	NO	19	4	12	7	G3	6			No	MX	N1	T3	Pancreatic Cancer	AAQI	WITH TUMOR	YES	YES	Progressive Disease	NO
TCGA-2L-AAQI-11A	YES	66	None			410.47.0	Nationwide Children's Hospital	TCGA-2L-AAQI-F62939	95C4CD42-A583-48BE-8E17-A0084AD03BF7	TCGA-2L-AAQI	22	29		0	-50	NO	02A3EB69-0290-40F0-8B4D-5CAA9C56F576	Scheduled Follow-up Submission	Progressive Disease		Three Tier		YES		No		YES		Tumor resection	NO	19	4	12	7	G3	6			No	MX	N1	T3	Pancreatic Cancer	AAQI	WITH TUMOR	YES	YES	Progressive Disease	NO
TCGA-IB-7651-01A	YES	64	Weekly Drinker			195.65.0	Nationwide Children's Hospital	TCGA-IB-7651-F44989	BB0B779D-3895-4A4E-A3F2-5314EC6E5797	TCGA-IB-7651	22	2	504	0		YES	F41426E8-BAD7-47D8-BF09-23F2858EACA8	Scheduled Follow-up Submission	Progressive Disease	3			NO	YES	No		YES		Cytology (e.g. Peritoneal or pleural fluid)	NO	8	2.9	12	7	G2	3		20	No	M0	N1	T3	Pancreatic Cancer	7651	WITH TUMOR	YES	YES	Complete Remission/Response	NO
TCGA-RB-AA9M-01A	YES	43	None			410.47.0	Nationwide Children's Hospital	TCGA-RB-AA9M-F65126	4C26AB80-0197-4F59-A05E-B5CD9CB3E2C9	TCGA-RB-AA9M	22	29		0		YES	873B5D1C-B33C-4431-9074-B1AC07F800AA	Scheduled Follow-up Submission	Progressive Disease		Four Tier		NO	NO	No		YES		Tissue Biopsy	NO	9	2	12	10	G3	1			No	MX	N1	T1		AA9M	WITH TUMOR	YES	YES	Progressive Disease	YES
TCGA-IB-7646-01A	YES	60	Occasional Drinker			195.65.0	Nationwide Children's Hospital	TCGA-IB-7646-F44986	9FA75FA2-E9D6-4DEB-8B26-CA121A545083	TCGA-IB-7646	22	2		0		NO	16AC64AD-9388-465F-924B-CA23458A9F76	Scheduled Follow-up Submission					NO	NO	No		YES		Cytology (e.g. Peritoneal or pleural fluid)	NO	6	4.5	12	7	G2	6			No	M0	N1	T3	Pancreatic Cancer	7646	WITH TUMOR	NO	YES	Partial Remission/Response	NO
TCGA-YY-A8LH-01A	YES	61	Occasional Drinker			369.54.0	Nationwide Children's Hospital	TCGA-YY-A8LH-F66996	924C1390-003E-4190-8E65-F5C9FAA23610	TCGA-YY-A8LH	22	29		0		YES	A59EB642-301C-4DED-988F-E9E05042066C	Scheduled Follow-up Submission	Complete Remission/Response				NO	NO	No	Distal Pancreatectomy & laporoscopy followed by Hand-assisted and Splenectomy	YES		Tumor resection	NO	17	4.2	12	10	G3	2		46	No	MX	N1	T3		A8LH	TUMOR FREE	YES	YES	Complete Remission/Response	YES
TCGA-FB-AAPY-01A	YES	71	Social Drinker			424.46.0	Nationwide Children's Hospital	TCGA-FB-AAPY-F64901	B157B65F-1C39-453D-B1DB-E308A5C1E877	TCGA-FB-AAPY	22	15	-9070	0		YES	9D807748-2EB0-48DB-AE3E-E6C5A5BAAFB3	Scheduled Follow-up Submission	Complete Remission/Response		Three Tier			YES	No		YES		Tissue Biopsy	NO	9	3.5	12	9	G2	2		25	No	MX	N1	T2		AAPY	TUMOR FREE	YES	YES	Complete Remission/Response	YES
TCGA-FB-AAPY-11A	YES	71	Social Drinker			424.46.0	Nationwide Children's Hospital	TCGA-FB-AAPY-F64901	B157B65F-1C39-453D-B1DB-E308A5C1E877	TCGA-FB-AAPY	22	15	-9070	0		YES	9D807748-2EB0-48DB-AE3E-E6C5A5BAAFB3	Scheduled Follow-up Submission	Complete Remission/Response		Three Tier			YES	No		YES		Tissue Biopsy	NO	9	3.5	12	9	G2	2		25	No	MX	N1	T2		AAPY	TUMOR FREE	YES	YES	Complete Remission/Response	YES
TCGA-RL-AAAS-01A	YES	60				410.47.0	Nationwide Children's Hospital	TCGA-RL-AAAS-F63835	4D0FDAB7-35B7-45E9-A0B8-894D7FAEA0C2	TCGA-RL-AAAS	22	19		0	0	NO	F3C24479-3BF0-48B9-AB46-3B8430376E5A	Scheduled Follow-up Submission	Complete Remission/Response				NO	YES	No		YES		Tumor resection	NO	20	2	12	8	G2	0	0		No	M0	N0	T2		AAAS	TUMOR FREE	NO	YES	Complete Remission/Response	NO
TCGA-3E-AAAZ-01A	YES	71				392.50.0	Nationwide Children's Hospital			TCGA-3E-AAAZ	22			0			4CB48431-B521-4712-9DF9-D0D684083A96								No	Pancreatoduodenectomy	YES		Tumor resection		10	3.2	12		G2	0	0		No	MX	N0	T3		AAAZ			YES
TCGA-FB-AAPQ-01A	YES	65				424.46.0	Nationwide Children's Hospital	TCGA-FB-AAPQ-F64864	4E49D2BF-35A1-4AD8-B2A2-9CEEF20E35D7	TCGA-FB-AAPQ	22	15		0			D151307C-AE4E-406B-A69C-4E442B3CBEDC	Scheduled Follow-up Submission			Three Tier		NO	YES	No		YES		Tissue Biopsy	NO	24	5	12	9	G2	4		25	No	MX	N1	T3		AAPQ		YES	YES	Progressive Disease	NO
TCGA-FB-AAPQ-11A	YES	65				424.46.0	Nationwide Children's Hospital	TCGA-FB-AAPQ-F64864	4E49D2BF-35A1-4AD8-B2A2-9CEEF20E35D7	TCGA-FB-AAPQ	22	15		0			D151307C-AE4E-406B-A69C-4E442B3CBEDC	Scheduled Follow-up Submission			Three Tier		NO	YES	No		YES		Tissue Biopsy	NO	24	5	12	9	G2	4		25	No	MX	N1	T3		AAPQ		YES	YES	Progressive Disease	NO
TCGA-F2-6879-01A	YES	57	Daily Drinker	1		195.65.0	Nationwide Children's Hospital	TCGA-F2-6879-F32761	086B2D45-2667-4AFD-BEAF-2B8840C2DECF	TCGA-F2-6879	22	11		0		YES	9DF33BAE-0892-41B1-A172-0716242F226D	Scheduled Follow-up Submission	Partial Remission/Response		Four Tier	Adenocarcinoma, NOS	NO	NO	No		YES		Tumor resection	NO	11	4.5	12	6	G2	2			No	M0	N1	T3		6879	WITH TUMOR	NO	YES	Complete Remission/Response	NO
TCGA-IB-7897-01A	YES	53	Social Drinker			210.65.0	Nationwide Children's Hospital	TCGA-IB-7897-F45058	904077F7-A721-4F78-9D06-87828376BAD3	TCGA-IB-7897	22	3		0		YES	1AF64746-0F41-408F-9CB3-D567BEBA1217	Scheduled Follow-up Submission					NO	NO	No		YES		Tumor resection	NO	17	3.5	12	7	G2	2			No	M0	N1	T3	Pancreatic Cancer	7897	WITH TUMOR	NO	YES	Progressive Disease	NO
TCGA-HZ-A9TJ-01A	YES	70				424.46.0	Nationwide Children's Hospital	TCGA-HZ-A9TJ-F72267	1E8FF466-B491-4025-8E4F-0AD75F0C9350	TCGA-HZ-A9TJ	22	1		0			B1C908BE-0B13-4019-8812-B61733CA1329	Scheduled Follow-up Submission	Progressive Disease		Four Tier	Adenocarcinoma, NOS			No		YES		Tumor resection	NO	1	8	12	5	G2	0	0		No	M1	N0	T3		A9TJ	WITH TUMOR	YES	YES		NO
TCGA-HZ-A9TJ-06A	YES	70				424.46.0	Nationwide Children's Hospital	TCGA-HZ-A9TJ-F72267	1E8FF466-B491-4025-8E4F-0AD75F0C9350	TCGA-HZ-A9TJ	22	1		0			B1C908BE-0B13-4019-8812-B61733CA1329	Scheduled Follow-up Submission	Progressive Disease		Four Tier	Adenocarcinoma, NOS			No		YES		Tumor resection	NO	1	8	12	5	G2	0	0		No	M1	N0	T3		A9TJ	WITH TUMOR	YES	YES		NO
[truncated: 72 more columns]

## Sheet: Table 2
icgc_donor_id	project_code	study_donor_involved_in	submitted_donor_id	donor_sex	donor_vital_status	disease_status_last_followup	donor_relapse_type	donor_age_at_diagnosis	donor_age_at_enrollment	donor_age_at_last_followup	donor_relapse_interval	donor_diagnosis_icd10	donor_tumour_staging_system_at_diagnosis	donor_tumour_stage_at_diagnosis	donor_tumour_stage_at_diagnosis_supplemental	donor_survival_time	donor_interval_of_last_followup	prior_malignancy	cancer_type_prior_malignancy	cancer_history_first_degree_relative
DO35009	PACA-AU		ICGC_0346	male	deceased			64	64			C25.0	TNM			787	787	unknown		unknown
DO35001	PACA-AU		ICGC_0345	female	deceased	progression	distant recurrence/metastasis	83	83		55	C25.0	TNM			77	77	unknown		unknown
DO35057	PACA-AU		ICGC_0352	female	alive	stable		76	76			C25.0	TNM			485	485	unknown		unknown
DO35073	PACA-AU		ICGC_0341	male	alive	progression	distant recurrence/metastasis	65	65			C25.0	TNM			764	764	unknown		unknown
DO35065	PACA-AU		ICGC_0353	male	deceased	progression		53	53			C25.0	TNM			164	164	unknown		unknown
DO35033	PACA-AU		ICGC_0349	female	deceased	progression		83	83			C25.0	TNM			107	107	unknown		unknown
DO35049	PACA-AU		ICGC_0351	female	alive	stable		87	87			C25.0	TNM			397	397	unknown		unknown
DO35041	PACA-AU		ICGC_0350	male	deceased	progression		61	61			C25.0	TNM			155	155	unknown		unknown
DO35017	PACA-AU		ICGC_0347	male	alive	stable		60	60			C25.0	TNM			238	238	unknown		unknown
DO35025	PACA-AU		ICGC_0348	female	alive	stable		56	56			C25.0	TNM			1591	1591	unknown		unknown
DO49206	PACA-AU		ICGC_0546	male	alive	progression		82	82			C25.0	TNM			32	32	unknown		unknown
DO49207	PACA-AU		ICGC_0547	male	alive	progression		73	73			C25.0	TNM			37	37	unknown		unknown
DO49204	PACA-AU	PCAWG	ICGC_0543	male	deceased	progression	distant recurrence/metastasis	67	67			C25.0	TNM			156	156	unknown		unknown
DO49205	PACA-AU		ICGC_0544	female	alive	stable		72	72			C25.0	TNM			89	89	unknown		unknown
DO49202	PACA-AU		ICGC_0530	male	deceased	progression	distant recurrence/metastasis	69	69		357	C25.0	TNM			464	464	unknown		unknown
DO49203	PACA-AU		ICGC_0531	female	deceased	progression	local recurrence	68	68		458	C25.0	TNM			518	518	unknown		unknown
DO49200	PACA-AU		ICGC_0528	female	alive	stable		59	59			C25.0	TNM			2703	2703	unknown		unknown
DO49201	PACA-AU		ICGC_0529									C25.0	TNM					unknown		unknown
DO49198	PACA-AU		ICGC_0512	female	deceased	progression	distant recurrence/metastasis	61	61		230	C25.0	TNM			251	251	unknown		unknown
DO49199	PACA-AU		ICGC_0513	male	deceased	progression	distant recurrence/metastasis	52	52		327	C25.3	TNM			1095	1095	unknown		unknown
DO49189	PACA-AU		ICGC_0524	male	deceased	progression	local recurrence	59	59		323	C25.0	TNM			440	440	unknown		unknown
DO49188	PACA-AU		ICGC_0523	male	deceased	stable		76	76			C25.0	TNM			47	47	unknown		unknown
DO49196	PACA-AU		ICGC_0510	male	deceased	progression	distant recurrence/metastasis	66	66		990	C25.0	TNM			1107	1107	unknown		unknown
DO49197	PACA-AU		ICGC_0511	male	deceased	progression	distant recurrence/metastasis	70	70		482	C25.0	TNM			514	514	unknown		unknown
DO49194	PACA-AU		ICGC_0527	male	deceased			62	62			C25.0	TNM			182	182	unknown		unknown
DO49195	PACA-AU		ICGC_0509	male	deceased	progression	distant recurrence/metastasis	59	59		36	C25.0	TNM			112	112	unknown		unknown
DO49192	PACA-AU		ICGC_0525	male	alive	progression	local recurrence	58	58		1075	C25.0	TNM			1758	1758	unknown		unknown
DO49193	PACA-AU	PCAWG	ICGC_0526	male	deceased	stable		60	60			C25.0	TNM			1	1	unknown		unknown
DO49190	PACA-AU		ICGC_0508	female	deceased	progression	local recurrence	61	61		528	C25.0	TNM			823	823	unknown		unknown
DO49178	PACA-AU	PCAWG	ICGC_0518	male	deceased	stable		58	58			C25.0	TNM			27	27	unknown		unknown
DO49179	PACA-AU		ICGC_0506		alive	stable						C25.0	TNM			2428	2428	unknown		unknown
DO49176	PACA-AU		ICGC_0505	male	deceased	progression	local recurrence	68	68		701	C25.0	TNM			925	925	unknown		unknown
DO49177	PACA-AU		ICGC_0517	male	deceased	progression	distant recurrence/metastasis	61	61		112	C25.0	TNM			123	123	unknown		unknown
DO49185	PACA-AU		ICGC_0542	male	alive	stable		55	55			C25.0	TNM			179	179	unknown		unknown
DO49183	PACA-AU	PCAWG	ICGC_0521	female	deceased	progression	distant recurrence/metastasis	51	51			C25.0	TNM			429	429	unknown		unknown
DO49184	PACA-AU	PCAWG	ICGC_0522	male	deceased	progression	distant recurrence/metastasis	56	56		242	C25.0	TNM			455	455	unknown		unknown
DO49181	PACA-AU	PCAWG	ICGC_0507	male	deceased	progression	distant recurrence/metastasis	77	77			C25.0	TNM			1534	1534	unknown		unknown
DO49182	PACA-AU		ICGC_0520	male	deceased	progression	distant recurrence/metastasis	56	56		284	C25.0	TNM			498	498	unknown		unknown
DO49180	PACA-AU		ICGC_0519	female	deceased	progression	local recurrence	61	61		821	C25.0	TNM			1057	1057	unknown		unknown
DO49169	PACA-AU		ICGC_0537	male	alive	stable		75	75			C25.0	TNM			196	196	unknown		unknown
DO49168	PACA-AU	PCAWG	ICGC_0536	male	alive	stable		58	58			C25.0	TNM			149	149	unknown		unknown
DO49165	PACA-AU		ICGC_0422	female	alive	stable		56	56			C25.0	TNM			205	205	unknown		unknown
DO49166	PACA-AU	PCAWG	ICGC_0535	female	alive	progression	distant recurrence/metastasis	40	40			C25.0	TNM			222	222	unknown		unknown
DO49175	PACA-AU		ICGC_0504	male	deceased	progression	distant recurrence/metastasis	68	68		348	C25.0	TNM			414	414	unknown		unknown
DO49172	PACA-AU	PCAWG	ICGC_0502	female	deceased	progression	distant recurrence/metastasis	60	60		688	C25.3	TNM			1021	1021	unknown		unknown
DO49173	PACA-AU		ICGC_0541	female	alive			75	75			C25.0	TNM					unknown		unknown
DO49170	PACA-AU		ICGC_0538	male	alive	stable		67	67			C25.0	TNM			197	197	unknown		unknown
DO49171	PACA-AU		ICGC_0540	male	alive	stable		58	58			C25.0	TNM			148	148	unknown		unknown
DO49158	PACA-AU		ICGC_0384	female	deceased			74	74			C25.0	TNM			278	278	unknown		unknown
DO49159	PACA-AU		ICGC_0385	male	alive	progression	distant recurrence/metastasis	69	69		741	C25.0	TNM			1042	1042	unknown		unknown
DO49156	PACA-AU		ICGC_0382	male	alive	progression	distant recurrence/metastasis				386	C25.0	TNM			505	505	unknown		unknown
DO49157	PACA-AU		ICGC_0383	female	alive	stable		69	69			C25.0	TNM			974	974	unknown		unknown
DO49154	PACA-AU		ICGC_0380	male	deceased	stable		70	70			C25.0	TNM			154	154	unknown		unknown
DO49155	PACA-AU		ICGC_0381	female	deceased	progression	local recurrence	78	78		413	C25.0	TNM			442	442	unknown		unknown
DO49163	PACA-AU		ICGC_0389	female	alive	progression	distant recurrence/metastasis	61	61		302	C25.0	TNM			302	302	unknown		unknown
DO49164	PACA-AU		ICGC_0421	male	alive	stable		70	70			C25.0	TNM			272	272	unknown		unknown
DO49161	PACA-AU		ICGC_0387	male	alive	stable		63	63			C25.0	TNM			603	603	unknown		unknown
DO49162	PACA-AU		ICGC_0388	female	alive	stable		68	68			C25.0	TNM			419	419	unknown		unknown
DO49160	PACA-AU		ICGC_0386	female	deceased	progression		80	80			C25.0	TNM			71	71	unknown		unknown
DO49149	PACA-AU		ICGC_0375	male	alive	stable		70	70			C25.0	TNM			1920	1920	unknown		unknown
DO49147	PACA-AU		ICGC_0373	male	alive	stable		64	64			C25.0	TNM			363	363	unknown		unknown
DO49148	PACA-AU		ICGC_0374	male	deceased	progression	distant recurrence/metastasis	68	68		252	C25.0	TNM			722	722	unknown		unknown
DO49145	PACA-AU		ICGC_0371	female	deceased	progression	distant recurrence/metastasis	58	58		112	C25.0	TNM			185	185	unknown		unknown
DO49146	PACA-AU		ICGC_0372	female	alive	stable		68	68			C25.0	TNM			564	564	unknown		unknown
DO49143	PACA-AU		ICGC_0369	female	deceased	progression		76	76			C25.0	TNM			1256	1256	unknown		unknown
DO49144	PACA-AU		ICGC_0370	male	deceased	progression		67	67			C25.0	TNM			1632	1632	unknown		unknown
DO49152	PACA-AU		ICGC_0378	male	deceased	stable		65	65			C25.0	TNM			13	13	unknown		unknown
DO49150	PACA-AU		ICGC_0376	female	deceased	progression	local recurrence	68	68		238	C25.0	TNM			330	330	unknown		unknown
DO49151	PACA-AU		ICGC_0377	male	deceased	progression		74	74			C25.0	TNM			56	56	unknown		unknown
DO49138	PACA-AU	PCAWG	ICGC_0420	male	deceased	progression		74	74			C25.0	TNM			230	230	unknown		unknown
DO49136	PACA-AU		ICGC_0418	female	alive	progression	distant recurrence/metastasis	57	57		168	C25.0	TNM			309	309	unknown		unknown
DO49137	PACA-AU	PCAWG	ICGC_0419	female	alive	progression	distant recurrence/metastasis	67	67		45	C25.0	TNM			232	232	unknown		unknown
DO49134	PACA-AU		ICGC_0416	female	alive	progression	distant recurrence/metastasis	83	83		98	C25.0	TNM			350	350	unknown		unknown
DO49135	PACA-AU	PCAWG	ICGC_0417	male	alive	stable		65	65			C25.0	TNM			270	270	unknown		unknown
DO49132	PACA-AU		ICGC_0414	female	alive	stable		86	86			C25.0	TNM			349	349	unknown		unknown
DO49133	PACA-AU	PCAWG	ICGC_0415	female	alive	stable		55	55			C25.0	TNM			188	188	unknown		unknown
DO49141	PACA-AU		ICGC_0367	male	deceased	progression	distant recurrence/metastasis	63	63		122	C25.0	TNM			357	357	unknown		unknown
DO49142	PACA-AU		ICGC_0368	male	deceased	progression		71	71			C25.0	TNM			111	111	unknown		unknown
DO49140	PACA-AU		ICGC_0366	female	deceased	progression	distant recurrence/metastasis	74	74		292	C25.0	TNM			560	560	unknown		unknown
DO49129	PACA-AU	PCAWG	ICGC_0365	male	alive	stable		50	50			C25.0	TNM			337	337	unknown		unknown
DO49127	PACA-AU	PCAWG	ICGC_0412	female	alive	stable		77	77			C25.0	TNM			392	392	unknown		unknown
DO49128	PACA-AU		ICGC_0363	female	alive	stable		65	65			C25.0	TNM			326	326	unknown		unknown
DO49125	PACA-AU		ICGC_0361	male	alive	progression	distant recurrence/metastasis	55	55		251	C25.0	TNM			406	406	unknown		unknown
DO49126	PACA-AU		ICGC_0362	female	alive	progression	distant recurrence/metastasis	59	59		274	C25.0	TNM			363	363	unknown		unknown
DO49123	PACA-AU		ICGC_0493	female	deceased	progression	distant recurrence/metastasis	80	80		209	C25.0	TNM			348	348	unknown		unknown
DO49124	PACA-AU		ICGC_0411	male	alive	progression	distant recurrence/metastasis	67	67			C25.0	TNM			377	377	unknown		unknown
DO49121	PACA-AU		ICGC_0360	male	alive	progression	local recurrence	68	68			C25.0	TNM			447	447	unknown		unknown
DO49122	PACA-AU		ICGC_0410	female	deceased	stable		78	78			C25.0	TNM			10	10	unknown		unknown
DO49130	PACA-AU		ICGC_0364	female	alive	stable		76	76			C25.0	TNM			351	351	unknown		unknown
DO49131	PACA-AU		ICGC_0413	male	deceased	stable		78	78			C25.0	TNM			32	32	unknown		unknown
DO49118	PACA-AU		ICGC_0423	female	deceased	progression	distant recurrence/metastasis	78	78			C25.0	TNM			369	369	unknown		unknown
DO49119	PACA-AU		ICGC_0409	male	deceased	progression	distant recurrence/metastasis	75	75			C25.0	TNM			279	279	unknown		unknown
DO49116	PACA-AU		ICGC_0408	female	alive	stable		62	62			C25.0	TNM			419	419	unknown		unknown
DO49117	PACA-AU		ICGC_0359	female	alive	stable		76	76			C25.0	TNM			398	398	unknown		unknown
DO49115	PACA-AU		ICGC_0407	female	alive	progression	distant recurrence/metastasis	68	68		326	C25.0	TNM			378	378	unknown		unknown
DO49112	PACA-AU		ICGC_0358	male	alive	stable		66	66			C25.0	TNM			441	441	unknown		unknown
DO49113	PACA-AU	PCAWG	ICGC_0406	female	alive	stable		46	46			C25.0	TNM			413	413	unknown		unknown
DO49110	PACA-AU		ICGC_0516	male	deceased	progression	distant recurrence/metastasis	56	56		1933	C25.0	TNM			2153	2153	unknown		unknown
DO49111	PACA-AU		ICGC_0405	female	alive	progression	local recurrence	65	65			C25.0	TNM			487	487	unknown		unknown
DO49109	PACA-AU		ICGC_0404	female	deceased	stable		57	57			C25.0	TNM			19	19	unknown		unknown
DO49107	PACA-AU		ICGC_0357	female	deceased	progression		60	60			C25.0	TNM			143	143	unknown		unknown
DO49108	PACA-AU		ICGC_0490	male	deceased	progression	distant recurrence/metastasis	81	81			C25.0	TNM			91	91	unknown		unknown
DO49105	PACA-AU		ICGC_0532	male	deceased	progression	distant recurrence/metastasis	59	59		129	C25.0	TNM			445	445	unknown		unknown
DO49103	PACA-AU		ICGC_0355	male	deceased	progression		62	62			C25.0	TNM			123	123	unknown		unknown
DO49104	PACA-AU		ICGC_0356	male	alive	stable		61	61			C25.0	TNM			501	501	unknown		unknown
DO49101	PACA-AU		ICGC_0403	male	deceased	progression	distant recurrence/metastasis	76	76		247	C25.0	TNM			385	385	unknown		unknown
DO49100	PACA-AU		ICGC_0402	male	alive	stable		79	79			C25.0	TNM			308	308	unknown		unknown
DO49089	PACA-AU		ICGC_0396	male	alive	stable		53	53			C25.0	TNM			474	474	unknown		unknown
DO49097	PACA-AU		ICGC_0399	female	deceased	progression	distant recurrence/metastasis	55	55		661	C25.0	TNM			894	894	unknown		unknown
DO49098	PACA-AU		ICGC_0400	female	deceased	progression		82	82			C25.0	TNM			568	568	unknown		unknown
DO49096	PACA-AU		ICGC_0488	male	alive	progression	local recurrence	78	78		728	C25.0	TNM			1328	1328	unknown		unknown
DO49093	PACA-AU		ICGC_0397	male	deceased	progression	distant recurrence/metastasis	75	75		34	C25.0	TNM			538	538	unknown		unknown
DO49094	PACA-AU		ICGC_0398	male	alive	progression	local recurrence	66	66			C25.0	TNM			1429	1429	unknown		unknown
DO49091	PACA-AU		ICGC_0487	female	alive	progression	local recurrence	72	72			C25.0	TNM			573	573	unknown		unknown
DO49090	PACA-AU	PCAWG	ICGC_0486	female	deceased	progression	distant recurrence/metastasis	77	77		65	C25.0	TNM			152	152	unknown		unknown
DO49079	PACA-AU	PCAWG	ICGC_0392	male	deceased	progression	distant recurrence/metastasis	50	50		18	C25.0	TNM			332	332	unknown		unknown
DO49077	PACA-AU		ICGC_0100	female	deceased	progression	distant recurrence/metastasis	34	34			C25.0	TNM			47	47	unknown		unknown
DO49078	PACA-AU	PCAWG	ICGC_0124	male	deceased	progression	local recurrence	79	79		423	C25.0	TNM			465	465	unknown		unknown
DO49086	PACA-AU		ICGC_0515	female	alive	progression		76	76			C25.0	TNM			869	869	unknown		unknown
DO49087	PACA-AU	PCAWG	ICGC_0395	female	deceased	progression		68	68			C25.0	TNM			260	260	unknown		unknown
DO49082	PACA-AU		ICGC_0514	male	alive	stable		65	65			C25.0	TNM			691	691	unknown		unknown
DO49080	PACA-AU	PCAWG	ICGC_0393	male	alive	stable		60	60			C25.0	TNM			83	83	unknown		unknown
DO49081	PACA-AU		ICGC_0394	male	deceased	progression		62	62			C25.0	TNM			132	132	unknown		unknown
DO49075	PACA-AU		ICGC_0499	female	deceased	progression	distant recurrence/metastasis	86	86		203	C25.0	TNM			238	238	unknown		unknown
DO49076	PACA-AU	PCAWG	ICGC_0391	male	deceased	progression	distant recurrence/metastasis	64	64		339	C25.0	TNM			480	480	unknown		unknown
DO49074	PACA-AU	PCAWG	ICGC_0354	male	deceased	progression		49	49			C25.0	TNM			168	168	unknown		unknown
DO49099	PACA-AU		ICGC_0401	female	deceased	progression	local recurrence	59	59		131	C25.0	TNM			226	226	unknown		unknown
DO33296	PACA-AU		ICGC_0078	female	deceased	progression	distant recurrence/metastasis	40	40		395	C25.0	TNM			756	756	unknown		unknown
DO33280	PACA-AU		ICGC_0097	male	deceased			64	64			C25.0	TNM	IA		30	30	unknown		unknown
DO33272	PACA-AU		ICGC_0095	male	deceased			62	62			C25.0	TNM			320	320	unknown		unknown
DO33288	PACA-AU	PCAWG	ICGC_0088	male	alive	progression	distant recurrence/metastasis	71	71		486	C25.0	TNM			1408	1408	unknown		unknown
DO33256	PACA-AU		ICGC_0118	female	deceased	progression	distant recurrence/metastasis	65	65		334	C25.0	TNM			476	476	unknown		unknown
DO34584	PACA-AU		ICGC_0182	female	alive	stable		60	60			C25.0	TNM			903	903	unknown		unknown
DO33264	PACA-AU	PCAWG	ICGC_0207	male	deceased			80	80			C25.0	TNM			205	205	unknown		unknown
DO34568	PACA-AU		ICGC_0074	male	deceased	progression	distant recurrence/metastasis	73	73		343	C25.0	TNM			362	362	unknown		unknown
DO33232	PACA-AU		ICGC_0101	female	alive	progression	local recurrence	70	70			C25.0	TNM			1107	1107	unknown		unknown
DO34560	PACA-AU		ICGC_0073	male	deceased	progression		65	65			C25.0	TNM			670	670	unknown		unknown
DO34576	PACA-AU		ICGC_0148	female	alive	progression	distant recurrence/metastasis	62	62		29	C25.0				929	929	unknown		unknown
DO33248	PACA-AU	PCAWG	ICGC_0115	female	deceased	progression	distant recurrence/metastasis	70	70		213	C25.0	TNM			796	796	unknown		unknown
DO33240	PACA-AU		ICGC_0112	male	deceased	progression	local recurrence	51	51			C25.0	TNM			347	347	unknown		unknown
DO33216	PACA-AU		ICGC_0110	male	deceased	progression	distant recurrence/metastasis	44	44		121	C25.0	TNM			141	141	unknown		unknown
DO34544	PACA-AU		ICGC_0236	male	alive	progression	distant recurrence/metastasis	76	76			C25.0	TNM			427	427	unknown		unknown
DO33224	PACA-AU		ICGC_0208	male	deceased	stable		55	55			C25.0	TNM			506	506	unknown		unknown
DO34552	PACA-AU		ICGC_0237	female	deceased	progression	distant recurrence/metastasis	80	80			C25.0	TNM			183	183	unknown		unknown
DO34528	PACA-AU		ICGC_0232	male	deceased	progression		66	66			C25.0	TNM			140	140	unknown		unknown
DO34520	PACA-AU		ICGC_0314	female	deceased			79	79			C25.0	TNM			10	10	unknown		unknown
DO34536	PACA-AU		ICGC_0233	male	deceased	progression	distant recurrence/metastasis	68	68		295	C25.0	TNM			464	464	unknown		unknown
DO33208	PACA-AU	PCAWG	ICGC_0205	male	deceased			59	59			C25.0	TNM			281	281	unknown		unknown
DO33200	PACA-AU	PCAWG	ICGC_0206	female	deceased			90	90			C25.0	TNM			109	109	unknown		unknown
DO34504	PACA-AU	PCAWG	ICGC_0230	male	deceased	progression		37	37			C25.0	TNM			257	257	unknown		unknown
DO33176	PACA-AU		ICGC_0093	male	deceased	progression	distant recurrence/metastasis	78	78		60	C25.0	TNM			125	125	unknown		unknown
DO33192	PACA-AU		ICGC_0104	male	deceased	progression	distant recurrence/metastasis	60	60		517	C25.0	TNM			653	653	unknown		unknown
DO33184	PACA-AU	PCAWG	ICGC_0109	male	deceased	progression	local recurrence	70	70		304	C25.0	TNM			913	913	unknown		unknown
DO34488	PACA-AU		ICGC_0122	female	alive	stable		67	67			C25.0	TNM			375	375	unknown		unknown
DO34480	PACA-AU		ICGC_0219	female	alive	stable		47	47			C25.0	TNM			634	634	unknown		unknown
DO33152	PACA-AU	PCAWG	ICGC_0105	male	deceased	progression	local recurrence	88	88		365	C25.0	TNM			430	430	unknown		unknown
DO33168	PACA-AU	PCAWG	ICGC_0099	female	deceased			80	80			C25.0	TNM			8	8	unknown		unknown
DO34496	PACA-AU		ICGC_0229	male	deceased	progression	distant recurrence/metastasis	73	73			C25.0	TNM			412	412	unknown		unknown
DO33160	PACA-AU	PCAWG	ICGC_0103	female	deceased	progression	distant recurrence/metastasis	78	78			C25.0	TNM			1091	1091	unknown		unknown
DO33136	PACA-AU		ICGC_0092	male	alive	stable		71	71			C25.0	TNM			1395	1395	unknown		unknown
DO34464	PACA-AU		ICGC_0216	female	alive	progression	distant recurrence/metastasis	83	83			C25.0	TNM			663	663	unknown		unknown
DO33144	PACA-AU		ICGC_0102	male	deceased			66	66			C25.0	TNM			460	460	unknown		unknown
DO34472	PACA-AU		ICGC_0145	male	deceased	progression	distant recurrence/metastasis	55	55		454	C25.0	TNM			515	515	unknown		unknown
DO34448	PACA-AU	PCAWG	ICGC_0215	female	deceased	progression	distant recurrence/metastasis	79	79			C25.0	TNM			719	719	unknown		unknown
DO34440	PACA-AU		ICGC_0166	female	alive	stable		75	75			C25.0	TNM			855	855	unknown		unknown
DO33112	PACA-AU		ICGC_0106	male	deceased	progression	distant recurrence/metastasis	68	68		91	C25.0	TNM			223	223	unknown		unknown
DO33128	PACA-AU	PCAWG	ICGC_0108	male	deceased			72	72			C25.0	TNM			423	423	unknown		unknown
DO34456	PACA-AU		ICGC_0195	female	alive	stable		79	79			C25.0	TNM			414	414	unknown		unknown
DO33120	PACA-AU		ICGC_0107	male	deceased			59	59			C25.0	TNM			563	563	unknown		unknown
DO34424	PACA-AU		ICGC_0238	male	deceased	progression	distant recurrence/metastasis	50	50			C25.0	TNM			284	284	unknown		unknown
DO33105	PACA-AU		ICGC_0096	male	deceased	progression	distant recurrence/metastasis	78	78		121	C25.0	TNM	IB		142	142	unknown		unknown
DO34432	PACA-AU	PCAWG	ICGC_0214	female	deceased	progression	distant recurrence/metastasis	82	82			C25.0	TNM			400	400	unknown		unknown
DO34408	PACA-AU		ICGC_0196	female	deceased	progression		80	80			C25.0	TNM			96	440	unknown		unknown
DO34400	PACA-AU		ICGC_0220	female	deceased	progression		62	62			C25.0	TNM			813	813	unknown		unknown
DO34416	PACA-AU		ICGC_0221	female	deceased	progression		63	63			C25.0	TNM			650	650	unknown		unknown
DO33496	PACA-AU		ICGC_0152	female	deceased	progression	distant recurrence/metastasis	76	76			C25.0	TNM			695	695	unknown		unknown
DO33472	PACA-AU	PCAWG	ICGC_0141	female	deceased	progression	distant recurrence/metastasis	75	75		273	C25.0	TNM			388	388	unknown		unknown
DO33488	PACA-AU	PCAWG	ICGC_0150	male	alive	stable		61	61			C25.0	TNM			844	844	unknown		unknown
DO33480	PACA-AU	PCAWG	ICGC_0146	male	alive	stable		52	52			C25.0	TNM			1054	1054	unknown		unknown
DO34704	PACA-AU		ICGC_0335	male	deceased	progression	distant recurrence/metastasis	63	63			C25.0	TNM			484	484	unknown		unknown
DO34712	PACA-AU		ICGC_0198	female	alive	stable		74	74			C25.0	TNM			417	417	unknown		unknown
DO34785	PACA-AU	PCAWG	ICGC_0304	female	alive	stable		67	67			C25.0	TNM			721	721	unknown		unknown
DO33456	PACA-AU		ICGC_0130	male	deceased	progression	distant recurrence/metastasis	67	67		334	C25.0	TNM			399	399	unknown		unknown
DO34793	PACA-AU	PCAWG	ICGC_0312	male	deceased	progression	distant recurrence/metastasis	56	56			C25.0	TNM			427	427	unknown		unknown
DO33464	PACA-AU		ICGC_0132	male	deceased	progression	distant recurrence/metastasis	65	65			C25.0	TNM			615	615	unknown		unknown
DO34768	PACA-AU		ICGC_0298	male	alive	progression		63	63			C25.0	TNM			582	582	unknown		unknown
DO34769	PACA-AU		ICGC_0305	male	alive	stable		73	73			C25.0	TNM			493	493	unknown		unknown
DO33432	PACA-AU		ICGC_0131	male	deceased	stable		69	69			C25.0	TNM			656	656	unknown		unknown
DO34760	PACA-AU		ICGC_0307	male	deceased	progression		76	76			C25.0	TNM			610	610	unknown		unknown
DO46741	PACA-AU		ICGC_0475	male	alive	stable		66	66			C25.0				254	254	unknown		unknown
DO33448	PACA-AU		ICGC_0081	male	alive	stable		55	55			C25.0	TNM			1490	1490	unknown		unknown
DO34777	PACA-AU		ICGC_0299	male	alive	stable		66	66			C25.0	TNM			589	589	unknown		unknown
DO33440	PACA-AU		ICGC_0091	male	deceased			72	72			C25.0	TNM			8	8	unknown		unknown
DO46736	PACA-AU		ICGC_0471	male	deceased	progression		62	62			C25.0				1079	1079	unknown		unknown
DO46733	PACA-AU		ICGC_0466	female	deceased	progression		64	64			C25.0				267	267	unknown		unknown
DO46730	PACA-AU		ICGC_0463	male	deceased	progression		66	66			C25.0				1103	1103	unknown		unknown
DO33416	PACA-AU		ICGC_0133	female	alive	progression	local recurrence	59	59			C25.0	TNM			1051	1051	unknown		unknown
DO34744	PACA-AU		ICGC_0302	male	alive	progression	distant recurrence/metastasis	65	65			C25.0	TNM			475	475	unknown		unknown
DO46739	PACA-AU		ICGC_0473	female	deceased	progression		56	56			C25.0				527	527	unknown		unknown
DO46724	PACA-AU		ICGC_0484	male	deceased	progression		68	68			C25.0				177	177	unknown		unknown
DO46727	PACA-AU		ICGC_0485	female	alive	stable		78	78			C25.0				168	168	unknown		unknown
DO46721	PACA-AU		ICGC_0483	male	alive	stable		40	40			C25.0				321	321	unknown		unknown
DO34752	PACA-AU		ICGC_0308	male	alive	stable		60	60			C25.0	TNM			252	252	unknown		unknown
DO33424	PACA-AU		ICGC_0138	male	alive	stable		77	77			C25.0	TNM			1058	1058	unknown		unknown
DO46715	PACA-AU		ICGC_0481	female	alive	stable						C25.0				545	545	unknown		unknown
DO46712	PACA-AU		ICGC_0480	male	alive	stable		55	55			C25.0				44	44	unknown		unknown
DO34728	PACA-AU	PCAWG	ICGC_0313	female	alive	stable		77	77			C25.0	TNM			508	508	unknown		unknown
DO34720	PACA-AU	PCAWG	ICGC_0301	male	alive	stable		68	68			C25.0	TNM			555	555	unknown		unknown
DO46718	PACA-AU		ICGC_0482	female	alive	stable		66	66			C25.0				309	309	unknown		unknown
DO46703	PACA-AU		ICGC_0477	male	deceased	progression						C25.0				203	203	unknown		unknown
DO46700	PACA-AU		ICGC_0476	male	deceased	progression		61	61			C25.0				518	518	unknown		unknown
DO33408	PACA-AU	PCAWG	ICGC_0143	female	alive	stable		68	68			C25.0	TNM			909	909	unknown		unknown
DO34736	PACA-AU	PCAWG	ICGC_0303	female	deceased	progression	distant recurrence/metastasis	78	78			C25.0	TNM			203	203	unknown		unknown
DO33400	PACA-AU	PCAWG	ICGC_0140	female	alive	stable		76	76			C25.0	TNM			1043	1043	unknown		unknown
DO46706	PACA-AU		ICGC_0478	male	alive	stable		76	76			C25.0				379	379	unknown		unknown
DO46709	PACA-AU		ICGC_0479	male	alive	stable		60	60			C25.0				84	84	unknown		unknown
DO33392	PACA-AU	PCAWG	ICGC_0139	male	alive	stable		70	70			C25.0	TNM			1014	1014	unknown		unknown
DO46694	PACA-AU		ICGC_0472	male	deceased	progression		72	72			C25.0				543	543	unknown		unknown
DO46697	PACA-AU		ICGC_0474	male	deceased	progression		81	81			C25.0				279	279	unknown		unknown
DO46691	PACA-AU		ICGC_0470	male	deceased	progression		75	75			C25.0				461	461	unknown		unknown
DO33376	PACA-AU	PCAWG	ICGC_0135	female	alive	stable		62	62			C25.0	TNM			909	909	unknown		unknown
DO46688	PACA-AU		ICGC_0469	female	alive	stable		78	78			C25.0				1530	1530	unknown		unknown
DO46685	PACA-AU		ICGC_0468	female	deceased	progression		67	67			C25.0				128	128	unknown		unknown
DO46682	PACA-AU		ICGC_0467	male	deceased			64	64			C25.0				1263	1263	unknown		unknown
DO46676	PACA-AU		ICGC_0464	female	deceased	progression		46	46			C25.0				755	755	unknown		unknown
DO46679	PACA-AU		ICGC_0465	female	alive	stable		64	64			C25.0				1607	1607	unknown		unknown
DO46673	PACA-AU		ICGC_0462	male	deceased	progression		69	69			C25.0				319	319	unknown		unknown
DO34688	PACA-AU		ICGC_0194	female	deceased	progression	distant recurrence/metastasis	57	57		57	C25.0	TNM			303	303	unknown		unknown
DO33352	PACA-AU		ICGC_0083	female	deceased	progression	distant recurrence/metastasis	67	67			C25.0	TNM			1003	1003	unknown		unknown
DO34680	PACA-AU	PCAWG	ICGC_0192	male	deceased	progression	distant recurrence/metastasis	75	75		46	C25.0	TNM			99	99	unknown		unknown
DO33368	PACA-AU	PCAWG	ICGC_0134	male	deceased	progression	distant recurrence/metastasis	81	81		30	C25.0	TNM			98	98	unknown		unknown
DO34696	PACA-AU	PCAWG	ICGC_0296	male	alive	stable		75	75			C25.0	TNM			689	689	unknown		unknown
DO33360	PACA-AU		ICGC_0117	female	deceased	progression	local recurrence	64	64			C25.0	TNM			916	916	unknown		unknown
DO34664	PACA-AU		ICGC_0190	male	deceased	progression		67	67			C25.0	TNM			113	113	unknown		unknown
DO33336	PACA-AU		ICGC_0116	female	deceased	progression	distant recurrence/metastasis	67	67		365	C25.0	TNM			451	451	unknown		unknown
DO33344	PACA-AU	PCAWG	ICGC_0087	male	deceased	progression	distant recurrence/metastasis	70	70		243	C25.0	TNM			361	361	unknown		unknown
DO34672	PACA-AU		ICGC_0191	male	deceased	progression	distant recurrence/metastasis	62	62			C25.0	TNM			356	356	unknown		unknown
DO34648	PACA-AU		ICGC_0162	female	alive	stable		65	65			C25.0	TNM			553	553	unknown		unknown
DO33312	PACA-AU		ICGC_0121	female	deceased	progression	distant recurrence/metastasis	53	53			C25.0	TNM			130	130	unknown		unknown
DO34640	PACA-AU	PCAWG	ICGC_0227	female	deceased	progression	distant recurrence/metastasis	49	49			C25.0	TNM			287	287	unknown		unknown
DO33328	PACA-AU		ICGC_0111	male	alive	progression	local recurrence	63	63			C25.0	TNM			906	906	unknown		unknown
DO34656	PACA-AU	PCAWG	ICGC_0185	female	alive	progression	distant recurrence/metastasis	61	61			C25.0	TNM			834	834	unknown		unknown
DO33320	PACA-AU		ICGC_0123	female	deceased	progression	distant recurrence/metastasis	65	65			C25.0	TNM			1122	1122	unknown		unknown
DO34624	PACA-AU		ICGC_0225	male	alive	stable		73	73			C25.0	TNM			260	260	unknown		unknown
DO33304	PACA-AU		ICGC_0080	female	deceased	progression	distant recurrence/metastasis	68	68		700	C25.0	TNM	IB		984	984	unknown		unknown
DO34632	PACA-AU		ICGC_0226	male	alive	stable		58	58			C25.0	TNM			523	523	unknown		unknown
DO34608	PACA-AU	PCAWG	ICGC_0201	female	deceased	progression	distant recurrence/metastasis	72	72		350	C25.0	TNM			709	709	unknown		unknown
DO34600	PACA-AU	PCAWG	ICGC_0199	male	deceased	progression		77	77		433	C25.0	TNM			537	537	unknown		unknown
DO34616	PACA-AU	PCAWG	ICGC_0224	female	alive	stable		68	68			C25.0	TNM			666	666	unknown		unknown
DO34144	PACA-AU		ICGC_0292	female	alive	stable		71	71			C25.0	TNM			296	296	unknown		unknown
DO34160	PACA-AU		ICGC_0294	female	alive	stable		60	60			C25.0	TNM			290	290	unknown		unknown
DO34152	PACA-AU		ICGC_0293	female	alive	stable		69	69			C25.0	TNM			297	297	unknown		unknown
DO34128	PACA-AU		ICGC_0290	male	alive	stable		76	76			C25.0	TNM			484	484	unknown		unknown
DO34120	PACA-AU		ICGC_0289	female	alive	progression		68	68			C25.0	TNM			480	480	unknown		unknown
DO34136	PACA-AU		ICGC_0291	male	alive	stable		51	51			C25.0	TNM			385	385	unknown		unknown
DO34112	PACA-AU		ICGC_0288	female	alive	progression	distant recurrence/metastasis	51	51			C25.0	TNM			492	492	unknown		unknown
DO34192	PACA-AU		ICGC_0173	male	deceased	progression	distant recurrence/metastasis	55	55		177	C25.0	TNM			478	478	unknown		unknown
DO34184	PACA-AU		ICGC_0167	female	alive	progression	distant recurrence/metastasis	66	66			C25.0	TNM			1042	1042	unknown		unknown
DO34168	PACA-AU		ICGC_0158	female	alive	stable		60	60			C25.0	TNM			224	224	unknown		unknown
DO34176	PACA-AU		ICGC_0161	male	deceased	progression		84	84			C25.0	TNM			110	110	unknown		unknown
DO34024	PACA-AU		ICGC_0277	male	alive	stable		72	72			C25.0	TNM			388	388	unknown		unknown
DO34032	PACA-AU		ICGC_0278	female	alive	stable		55	55			C25.0	TNM			592	592	unknown		unknown
DO34008	PACA-AU		ICGC_0275	male	alive	stable		58	58			C25.0	TNM			408	408	unknown		unknown
DO34000	PACA-AU		ICGC_0274	male	alive	stable		75	75			C25.0	TNM			422	422	unknown		unknown
DO34016	PACA-AU		ICGC_0276	male	alive	stable		67	67			C25.0	TNM			407	407	unknown		unknown
DO34088	PACA-AU		ICGC_0285	female	deceased			75	75			C25.0	TNM			34	34	unknown		unknown
DO34096	PACA-AU		ICGC_0286	male	deceased	progression		71	71			C25.0	TNM			333	333	unknown		unknown
DO34072	PACA-AU		ICGC_0283	female	alive	stable		69	69			C25.0	TNM			337	337	unknown		unknown
DO34064	PACA-AU		ICGC_0282	female	alive	stable		65	65			C25.0	TNM			340	340	unknown		unknown
DO34080	PACA-AU		ICGC_0284	female	alive	stable		74	74			C25.0	TNM			304	304	unknown		unknown
DO34048	PACA-AU		ICGC_0280	male	alive	stable		70	70			C25.0	TNM			351	351	unknown		unknown
DO34040	PACA-AU		ICGC_0279	male	alive	stable		78	78			C25.0	TNM			359	359	unknown		unknown
DO34056	PACA-AU		ICGC_0281	female	alive	stable		73	73			C25.0	TNM			350	350	unknown		unknown
DO33056	PACA-AU		ICGC_0086	male	deceased			42	42			C25.0	TNM			216	216	unknown		unknown
DO34384	PACA-AU		ICGC_0218	male	deceased	progression	distant recurrence/metastasis	71	71			C25.0	TNM			587	587	unknown		unknown
DO33070	PACA-AU		ICGC_0089	female	deceased	progression	distant recurrence/metastasis	69	69		213	C25.0	TNM			423	423	unknown		unknown
DO34392	PACA-AU		ICGC_0234	female	alive	progression	distant recurrence/metastasis	63	63			C25.0	TNM			715	715	unknown		unknown
DO33063	PACA-AU		ICGC_0077	female	deceased	progression		63	63		213	C25.0	TNM			549	549	unknown		unknown
DO34368	PACA-AU	PCAWG	ICGC_0235	female	deceased	progression	distant recurrence/metastasis	64	64		342	C25.0	TNM			537	537	unknown		unknown
DO33037	PACA-AU		ICGC_0005	male	deceased	progression	distant recurrence/metastasis	63	63		371	C25.2	TNM			641	641	unknown		unknown
DO33032	PACA-AU	PCAWG	ICGC_0067	male	deceased	progression	distant recurrence/metastasis	64	64	65		C25.0	TNM			495	495	unknown		unknown
DO34360	PACA-AU		ICGC_0177	male	alive	progression	local recurrence	45	45			C25.0	TNM			888	888	unknown		unknown
DO33049	PACA-AU		ICGC_0085	male	deceased			54	54			C25.0	TNM			324	324	unknown		unknown
DO33043	PACA-AU		ICGC_0084	female	deceased	progression	distant recurrence/metastasis	60	60		182	C25.0	TNM			381	381	unknown		unknown
DO34376	PACA-AU		ICGC_0137	male	deceased	progression		61	61			C25.0	TNM			179	179	unknown		unknown
DO33042	PACA-AU	PCAWG	ICGC_0052	male	alive	stable		76	76	77	246	C25.0	TNM			1424	1424	unknown		unknown
DO33016	PACA-AU	PCAWG	ICGC_0063	male	alive	stable		54	54	55		C25.0	TNM			1275	1275	unknown		unknown
DO34344	PACA-AU		ICGC_0203	female	alive	progression	distant recurrence/metastasis	68	68		342	C25.0	TNM			749	749	unknown		unknown
DO33012	PACA-AU		ICGC_0062	male	deceased	stable		70	70			C25.0	TNM	T2N0MX		1	1	unknown		unknown
DO33028	PACA-AU	PCAWG	ICGC_0066	male	deceased	progression	distant recurrence/metastasis	58	58	58	157	C25.0	TNM			311	311	unknown		unknown
DO33024	PACA-AU		ICGC_0065	male	deceased			63	63			C25.0	TNM			127	127	unknown		unknown
DO33020	PACA-AU		ICGC_0064	male	deceased	progression	distant recurrence/metastasis	78	78	79		C25.0	TNM			434	434	unknown		unknown
DO34328	PACA-AU		ICGC_0228	male	deceased	progression		67	67			C25.0	TNM			468	468	unknown		unknown
DO34320	PACA-AU		ICGC_0157	female	alive	stable		62	62			C25.0	TNM			947	947	unknown		unknown
DO33008	PACA-AU	PCAWG	ICGC_0061	female	deceased	progression	distant recurrence/metastasis	56	56	57	99	C25.0	TNM			970	970	unknown		unknown
DO33004	PACA-AU		ICGC_0060	male	alive	progression	local recurrence	47	47	48		C25.0	TNM			596	596	unknown		unknown
DO34336	PACA-AU	PCAWG	ICGC_0217	female	alive	stable		70	70			C25.0	TNM			743	743	unknown		unknown
DO33000	PACA-AU	PCAWG	ICGC_0059	male	alive	progression	distant recurrence/metastasis	68	68	69		C25.0	TNM			1258	1258	unknown		unknown
DO33098	PACA-AU		ICGC_0079	male	deceased	progression	distant recurrence/metastasis	68	68		456	C25.0	TNM			746	746	unknown		unknown
DO33077	PACA-AU	PCAWG	ICGC_0075	female	deceased			76	76			C25.0	TNM			476	476	unknown		unknown
DO33091	PACA-AU		ICGC_0076	male	deceased			56	56			C25.0	TNM			142	142	unknown		unknown
DO33084	PACA-AU		ICGC_0090	female	deceased			72	72			C25.0	TNM			6	6	unknown		unknown
DO34304	PACA-AU		ICGC_0128	female	deceased	progression	distant recurrence/metastasis	68	68		301	C25.0	TNM			638	638	unknown		unknown
DO34312	PACA-AU	PCAWG	ICGC_0315	female	deceased	progression	distant recurrence/metastasis	58	58			C25.0	TNM			226	226	unknown		unknown
DO34264	PACA-AU	PCAWG	ICGC_0069	female	deceased	progression	local recurrence	63	63		702	C25.0	TNM			1144	1144	unknown		unknown
DO34280	PACA-AU		ICGC_0197	female	alive	stable		72	72			C25.0	TNM			798	798	unknown		unknown
DO34272	PACA-AU		ICGC_0202	male	alive	stable		46	46			C25.0	TNM			713	713	unknown		unknown
DO34248	PACA-AU		ICGC_0184	female	alive	progression	local recurrence	67	67		334	C25.0	TNM			785	785	unknown		unknown
DO34240	PACA-AU	PCAWG	ICGC_0188	male	deceased	progression	distant recurrence/metastasis	72	72		50	C25.0	TNM			236	236	unknown		unknown
DO34256	PACA-AU		ICGC_0187	female	alive	stable		52	52			C25.0	TNM			685	685	unknown		unknown
DO34232	PACA-AU		ICGC_0179	female	alive	progression	distant recurrence/metastasis	69	69			C25.0	TNM			905	905	unknown		unknown
DO34208	PACA-AU		ICGC_0178	male	deceased	progression	distant recurrence/metastasis	66	66		126	C25.0	TNM			305	305	unknown		unknown
DO34200	PACA-AU		ICGC_0174	female	alive	progression	distant recurrence/metastasis	72	72			C25.0	TNM			985	985	unknown		unknown
DO34216	PACA-AU		ICGC_0180	female	alive	progression	distant recurrence/metastasis	52	52		254	C25.0	TNM			864	864	unknown		unknown
DO34288	PACA-AU	PCAWG	ICGC_0223	female	deceased	progression		83	83			C25.0	TNM			220	220	unknown		unknown
DO34296	PACA-AU		ICGC_0189	male	alive	stable		62	62			C25.0	TNM			832	832	unknown		unknown
DO32817	PACA-AU		ICGC_0327	male	deceased													unknown		unknown
DO32819	PACA-AU		ICGC_0328	male	deceased				85									unknown		unknown
DO33976	PACA-AU		ICGC_0210	male	deceased	progression		71	71			C25.0	TNM			113	113	unknown		unknown
DO33984	PACA-AU	PCAWG	ICGC_0144	male	alive	stable		64	64			C25.0	TNM			847	847	unknown		unknown
DO33952	PACA-AU		ICGC_0070	male	deceased	progression	local recurrence	72	72		317	C25.0	TNM			1392	1392	unknown		unknown
DO33968	PACA-AU		ICGC_0082	female	deceased	progression		68	68			C25.0	TNM			152	152	unknown		unknown
DO33960	PACA-AU	PCAWG	ICGC_0212	male	deceased	progression	local recurrence	57	57			C25.0	TNM			602	616	unknown		unknown
DO33936	PACA-AU		ICGC_0211	female	deceased	progression		71	71			C25.0	TNM			486	486	unknown		unknown
DO33944	PACA-AU		ICGC_0213	female	deceased	progression		78	78			C25.0	TNM			330	330	unknown		unknown
DO33912	PACA-AU		ICGC_0270	female	deceased	progression	local recurrence	54	54			C25.0	TNM			1081	1081	unknown		unknown
DO33928	PACA-AU		ICGC_0272	male	deceased	progression	distant recurrence/metastasis	73	73			C25.0	TNM			1157	1157	unknown		unknown
DO33920	PACA-AU		ICGC_0271	male	deceased	progression	distant recurrence/metastasis	70	70			C25.0	TNM			957	957	unknown		unknown
DO33992	PACA-AU		ICGC_0273	female	deceased	progression	distant recurrence/metastasis	67	67			C25.0	TNM			507	507	unknown		unknown
DO32988	PACA-AU		ICGC_0056	female	alive	progression	distant recurrence/metastasis	61	61	62		C25.0	TNM			1170	1170	unknown		unknown
DO32984	PACA-AU	PCAWG	ICGC_0055	male	deceased	progression	distant recurrence/metastasis	61	61	62	104	C25.2	TNM			415	415	unknown		unknown
DO32980	PACA-AU	PCAWG	ICGC_0054	female	deceased	progression	distant recurrence/metastasis	72	72			C25.2	TNM			78	78	unknown		unknown
DO32996	PACA-AU		ICGC_0058	female	deceased	progression	distant recurrence/metastasis	59	59	60	228	C25.0	TNM			280	280	unknown		unknown
DO32992	PACA-AU		ICGC_0057	male	deceased	progression	distant recurrence/metastasis	64	64		68	C25.0	TNM			363	363	unknown		unknown
DO32968	PACA-AU		ICGC_0050	male	alive	progression	local recurrence	78	78	80	197	C25.0	TNM			1456	1456	unknown		unknown
DO32964	PACA-AU		ICGC_0049	male	deceased	progression	local recurrence	83	83		448	C25.0	TNM			516	516	unknown		unknown
DO32960	PACA-AU	PCAWG	ICGC_0048	female	alive	stable		65	65	66		C25.0	TNM			1258	1258	unknown		unknown
DO32976	PACA-AU	PCAWG	ICGC_0053	female	deceased	progression	distant recurrence/metastasis	73	73	75	448	C25.0	TNM			610	610	unknown		unknown
DO32972	PACA-AU	PCAWG	ICGC_0051	male	deceased	progression	distant recurrence/metastasis	66	66	67	293	C25.0	TNM			605	605	unknown		unknown
DO32948	PACA-AU		ICGC_0045	male	deceased	stable		76	76			C25.0	TNM			28	28	unknown		unknown
DO32944	PACA-AU		ICGC_0044	female	alive	stable		72	72	73		C25.0	TNM			1424	1424	unknown		unknown
DO32940	PACA-AU		ICGC_0043	male	deceased	progression	distant recurrence/metastasis	52	52	53	540	C25.0	TNM			717	717	unknown		unknown
DO32956	PACA-AU		ICGC_0047	male	alive	stable		71	71	72		C25.0	TNM			1448	1448	unknown		unknown
DO32952	PACA-AU		ICGC_0046	male	deceased	progression	distant recurrence/metastasis	72	72		202	C25.1	TNM			234	234	unknown		unknown
DO32928	PACA-AU		ICGC_0040	male	deceased	progression	local recurrence	77	77		277	C25.0	TNM			304	304	unknown		unknown
DO32924	PACA-AU		ICGC_0039	male	deceased	progression	distant recurrence/metastasis	67	67		249	C25.0	TNM			313	313	unknown		unknown
DO32920	PACA-AU		ICGC_0038	male	deceased			57	57			C25.0	TNM	T3N1MX		201	201	unknown		unknown
DO32936	PACA-AU		ICGC_0042	male	deceased	progression	distant recurrence/metastasis	68	68		506	C25.0	TNM			552	552	unknown		unknown
DO32932	PACA-AU		ICGC_0041	male	alive	stable		74	74	75		C25.0	TNM			1502	1502	unknown		unknown
DO32908	PACA-AU		ICGC_0035	female	alive	stable		77	77	78		C25.0	TNM			1478	1478	unknown		unknown
DO32904	PACA-AU		ICGC_0034	female	deceased	progression	local recurrence	78	78			C25.2	TNM	T3N0MX		92	92	unknown		unknown
DO32900	PACA-AU	PCAWG	ICGC_0033	male	deceased	progression	distant recurrence/metastasis	51	51	53	363	C25.0	TNM			768	768	unknown		unknown
DO32916	PACA-AU	PCAWG	ICGC_0037	male	deceased	progression	distant recurrence/metastasis	78	78		119	C25.1	TNM			154	154	unknown		unknown
DO32912	PACA-AU		ICGC_0036	male	alive	stable		64	64	65	241	C25.0	TNM			1253	1253	unknown		unknown
DO32887	PACA-AU		ICGC_0029	female	deceased	progression	distant recurrence/metastasis	79	79		202	C25.0	TNM			359	359	unknown		unknown
DO32884	PACA-AU		ICGC_0028	female	deceased	progression	distant recurrence/metastasis	55	55		450	C25.0	TNM			507	507	unknown		unknown
DO32881	PACA-AU		ICGC_0027	male	deceased	progression	distant recurrence/metastasis	64	64		189	C25.1	TNM			409	409	unknown		unknown
DO32893	PACA-AU	PCAWG	ICGC_0031	female	deceased	progression	distant recurrence/metastasis	61	61	63	438	C25.0	TNM			1077	1077	unknown		unknown
DO32896	PACA-AU		ICGC_0032	female	deceased	progression	distant recurrence/metastasis	66	66	68	632	C25.0	TNM			835	835	unknown		unknown
DO32890	PACA-AU		ICGC_0030	female	deceased			79	79			C25.0	TNM			199	199	unknown		unknown
DO32869	PACA-AU		ICGC_0023	male	deceased	progression	distant recurrence/metastasis	49	49	51		C25.0	TNM			942	942	unknown		unknown
DO32866	PACA-AU		ICGC_0022	female	deceased			87	87			C25.1	TNM			36	36	unknown		unknown
DO32860	PACA-AU	PCAWG	ICGC_0020	male	deceased	progression	distant recurrence/metastasis	57	57	59	421	C25.0	TNM			1259	1259	unknown		unknown
DO32863	PACA-AU	PCAWG	ICGC_0021	male	deceased	progression	distant recurrence/metastasis	60	60		380	C25.0	TNM			715	715	unknown		unknown
DO32875	PACA-AU	PCAWG	ICGC_0025	male	deceased	progression	distant recurrence/metastasis	69	69		139	C25.0	TNM			348	348	unknown		unknown
DO32878	PACA-AU	PCAWG	ICGC_0026	female	deceased	progression	distant recurrence/metastasis	69	69		223	C25.0	TNM			260	260	unknown		unknown
DO32872	PACA-AU		ICGC_0024	male	alive	stable		69	69	71		C25.0	TNM			1639	1639	unknown		unknown
DO32847	PACA-AU		ICGC_0014	female	deceased	progression	local recurrence	47	47	49	239	C25.0	TNM			1200	1200	unknown		unknown
DO32849	PACA-AU		ICGC_0015	male	deceased	progression	distant recurrence/metastasis	65	65		293	C25.0	TNM			315	315	unknown		unknown
DO32843	PACA-AU		ICGC_0012	female	deceased	progression	distant recurrence/metastasis	60	60	62	362	C25.0	TNM			1048	1048	unknown		unknown
DO32845	PACA-AU		ICGC_0013	male	deceased			81	81			C25.0	TNM			135	135	unknown		unknown
DO32841	PACA-AU		ICGC_0011	male	alive	stable		62	62	64		C25.0	TNM			1680	1680	unknown		unknown
DO32857	PACA-AU		ICGC_0019	female	deceased	progression	distant recurrence/metastasis	79	79	81	377	C25.0	TNM			858	858	unknown		unknown
DO32853	PACA-AU		ICGC_0017	female	deceased			72	72			C25.0	TNM			111	111	unknown		unknown
DO32855	PACA-AU		ICGC_0018	male	deceased	progression	distant recurrence/metastasis	64	64		315	C25.1	TNM			345	345	unknown		unknown
DO32851	PACA-AU		ICGC_0016	female	deceased	progression	distant recurrence/metastasis	84	84		322	C25.0	TNM	T2NXMX		456	456	unknown		unknown
DO32829	PACA-AU		ICGC_0004	female	deceased	progression	distant recurrence/metastasis	78	78	80		C25.0	TNM	T2N0MX		1874	1874	unknown		unknown
DO32825	PACA-AU		ICGC_0002	female	deceased	progression	local recurrence	77	77	84	1954	C25.0	TNM			2848	2848	unknown		unknown
DO32827	PACA-AU		ICGC_0003	female	alive	stable		58	58	61		C25.0	TNM			1778	1778	unknown		unknown
DO32821	PACA-AU		ICGC_0329	female	deceased				77									unknown		unknown
DO32823	PACA-AU		ICGC_0001	male	deceased	progression	local recurrence	59	59	61	388	C25.0	TNM	T3N0MX		522	522	unknown		unknown
DO32839	PACA-AU		ICGC_0010	male	deceased	stable		55	55			C25.0	TNM			487	487	unknown		unknown
DO32835	PACA-AU		ICGC_0008	male	deceased	progression	distant recurrence/metastasis	72	72	74	725	C25.0	TNM			1209	1209	unknown		unknown
DO32837	PACA-AU	PCAWG	ICGC_0009	male	deceased	progression	distant recurrence/metastasis	34	34		115	C25.0	TNM			399	399	unknown		unknown
DO32831	PACA-AU	PCAWG	ICGC_0006	female	alive	stable		49	49	51	519	C25.1	TNM			1715	1715	unknown		unknown
DO32833	PACA-AU	PCAWG	ICGC_0007	female	deceased			74	74			C25.0	TNM	T3N0MX		56	56	unknown		unknown
DO33616	PACA-AU		ICGC_0175	female	deceased			78	78			C25.0	TNM			132	132	unknown		unknown
DO34945	PACA-AU		ICGC_0342	male	deceased	progression	local recurrence	68	68		168	C25.0	TNM			189	189	unknown		unknown
DO33624	PACA-AU		ICGC_0316	female	deceased			60	60			C25.0	TNM			82	82	unknown		unknown
DO34953	PACA-AU		ICGC_0337	male	deceased	progression	distant recurrence/metastasis	45	45			C25.0	TNM			420	420	unknown		unknown
DO34929	PACA-AU		ICGC_0336	female	deceased			72	72			C25.0	TNM			447	447	unknown		unknown
DO34921	PACA-AU		ICGC_0320	female	deceased	progression	distant recurrence/metastasis	66	66		125	C25.0	TNM			272	272	unknown		unknown
DO34937	PACA-AU		ICGC_0113	male	deceased	progression		50	50			C25.0	TNM			44	44	unknown		unknown
DO33608	PACA-AU		ICGC_0170	female	alive	progression	distant recurrence/metastasis	68	68			C25.0	TNM			761	761	unknown		unknown
DO33600	PACA-AU	PCAWG	ICGC_0169	female	alive	progression	distant recurrence/metastasis	77	77			C25.0	TNM			854	854	unknown		unknown
DO34905	PACA-AU	PCAWG	ICGC_0321	male	alive	stable		64	64			C25.0	TNM			1142	1142	unknown		unknown
DO34913	PACA-AU		ICGC_0322	male	alive	progression	distant recurrence/metastasis	70	70			C25.0	TNM			794	794	unknown		unknown
DO33696	PACA-AU		ICGC_0243	female	deceased	progression		73	73			C25.0	TNM			937	937	unknown		unknown
DO33672	PACA-AU		ICGC_0240	female	deceased	progression	local recurrence	75	75			C25.0	TNM			2423	2423	unknown		unknown
DO33688	PACA-AU		ICGC_0242	female	deceased	progression	distant recurrence/metastasis	68	68			C25.0	TNM			394	394	unknown		unknown
DO33680	PACA-AU		ICGC_0241	male	alive	stable		80	80			C25.0	TNM			1477	1477	unknown		unknown
DO33656	PACA-AU		ICGC_0098	female	deceased	progression	distant recurrence/metastasis	76	76		106	C25.0	TNM			164	164	unknown		unknown
DO34985	PACA-AU		ICGC_0343	female	deceased	progression	distant recurrence/metastasis	61	61			C25.0	TNM			994	994	unknown		unknown
DO33664	PACA-AU		ICGC_0239	female	deceased	progression	local recurrence	70	70			C25.0	TNM			1352	1352	unknown		unknown
DO34993	PACA-AU		ICGC_0344	male	deceased	progression	distant recurrence/metastasis	64	64		38	C25.0	TNM			944	944	unknown		unknown
DO34969	PACA-AU		ICGC_0339	male	deceased	progression	local recurrence	75	75		348	C25.0	TNM			579	579	unknown		unknown
DO34961	PACA-AU	PCAWG	ICGC_0338	male	deceased	progression	distant recurrence/metastasis	71	71			C25.0	TNM			632	639	unknown		unknown
DO33632	PACA-AU		ICGC_0072	male	deceased	progression	distant recurrence/metastasis	67	67		808	C25.0				1105	1105	unknown		unknown
DO34977	PACA-AU		ICGC_0340	female	deceased	progression	distant recurrence/metastasis	78	78		241	C25.0	TNM			307	307	unknown		unknown
DO33648	PACA-AU		ICGC_0071	female	deceased	progression	distant recurrence/metastasis	72	72		417	C25.0	TNM			517	517	unknown		unknown
DO33640	PACA-AU		ICGC_0209	female	deceased	progression	distant recurrence/metastasis	68	68		123	C25.0	TNM			523	523	unknown		unknown
DO33592	PACA-AU		ICGC_0165	male	deceased			61	61			C25.0	TNM					unknown		unknown
DO34825	PACA-AU		ICGC_0310	male	deceased	progression	distant recurrence/metastasis	64	64			C25.0	TNM			456	456	unknown		unknown
DO34833	PACA-AU		ICGC_0311	male	alive	progression	distant recurrence/metastasis	78	78			C25.0	TNM			596	596	unknown		unknown
DO34809	PACA-AU	PCAWG	ICGC_0309	female	deceased	progression	distant recurrence/metastasis	74	74		259	C25.0	TNM			297	297	unknown		unknown
DO34801	PACA-AU	PCAWG	ICGC_0295	male	alive	stable		60	60			C25.0	TNM			626	626	unknown		unknown
DO34817	PACA-AU	PCAWG	ICGC_0300	female	alive	stable		72	72			C25.0	TNM			540	540	unknown		unknown
DO33576	PACA-AU		ICGC_0159	female	alive	stable		43	43			C25.0	TNM			1170	1170	unknown		unknown
DO33584	PACA-AU		ICGC_0164	female	deceased	progression		55	55			C25.0	TNM			506	506	unknown		unknown
DO34889	PACA-AU		ICGC_0317	male	deceased	progression		90	90			C25.0	TNM			191	191	unknown		unknown
DO34881	PACA-AU		ICGC_0136	male	alive	progression	distant recurrence/metastasis	71	71		707	C25.0	TNM			1001	1001	unknown		unknown
DO33552	PACA-AU	PCAWG	ICGC_0149	female	alive	stable		70	70		182	C25.0	TNM			873	873	unknown		unknown
DO33568	PACA-AU		ICGC_0094	female	deceased	progression	distant recurrence/metastasis	50	50			C25.0	TNM			233	233	unknown		unknown
DO34897	PACA-AU		ICGC_0318	male	deceased	progression	distant recurrence/metastasis	77	77		451	C25.0	TNM			664	664	unknown		unknown
DO33560	PACA-AU		ICGC_0154	female	alive	progression	distant recurrence/metastasis	63	63			C25.0	TNM			936	936	unknown		unknown
DO33536	PACA-AU		ICGC_0147	male	deceased	progression	distant recurrence/metastasis	71	71		304	C25.0	TNM			482	482	unknown		unknown
DO34865	PACA-AU		ICGC_0323	female	deceased	progression	local recurrence	45	45		136	C25.0	TNM			363	363	unknown		unknown
DO34873	PACA-AU		ICGC_0319	male	deceased	progression	distant recurrence/metastasis	64	64		28	C25.0	TNM			578	578	unknown		unknown
DO33544	PACA-AU	PCAWG	ICGC_0153	female	deceased	progression	local recurrence	83	83			C25.0	TNM			412	412	unknown		unknown
DO34849	PACA-AU	PCAWG	ICGC_0326	female	deceased	progression	distant recurrence/metastasis	86	86		173	C25.0	TNM			272	272	unknown		unknown
DO34841	PACA-AU		ICGC_0324	male	deceased	progression	local recurrence	71	71			C25.0	TNM			506	506	unknown		unknown
DO33512	PACA-AU	PCAWG	ICGC_0114	female	deceased							C25.0	TNM			499	499	unknown		unknown
DO33528	PACA-AU		ICGC_0119	male	deceased	progression	distant recurrence/metastasis	36	36		304	C25.0				343	343	unknown		unknown
DO34857	PACA-AU		ICGC_0325	female	alive	stable		67	67			C25.0	TNM			178	178	unknown		unknown
DO33520	PACA-AU		ICGC_0125	female	deceased	progression	local recurrence	63	63		152	C25.0	TNM			256	256	unknown		unknown
DO33904	PACA-AU		ICGC_0269	female	deceased	progression	distant recurrence/metastasis	72	72			C25.0	TNM			1737	1737	unknown		unknown
DO33856	PACA-AU		ICGC_0263	male	deceased	progression	distant recurrence/metastasis	46	46			C25.0	TNM			650	650	unknown		unknown
DO33864	PACA-AU		ICGC_0264	female	deceased	progression	distant recurrence/metastasis	67	67			C25.0	TNM			890	890	unknown		unknown
DO33832	PACA-AU		ICGC_0260	male	deceased	progression	distant recurrence/metastasis	60	60			C25.0	TNM			716	716	unknown		unknown
DO33848	PACA-AU		ICGC_0262	male	deceased	progression	distant recurrence/metastasis	75	75			C25.0	TNM			151	151	unknown		unknown
DO33840	PACA-AU		ICGC_0261	female	deceased			67	67			C25.0	TNM			211	211	unknown		unknown
DO33816	PACA-AU		ICGC_0258	male	deceased	progression	distant recurrence/metastasis	62	62			C25.0	TNM			803	803	unknown		unknown
DO33824	PACA-AU		ICGC_0259	male	deceased	progression	local recurrence	56	56			C25.0	TNM			274	274	unknown		unknown
DO33808	PACA-AU		ICGC_0257	male	deceased			79	79			C25.0	TNM			14	14	unknown		unknown
DO33800	PACA-AU		ICGC_0256	male	deceased	progression	local recurrence	69	69			C25.0	TNM			151	151	unknown		unknown
DO33896	PACA-AU		ICGC_0268	male	deceased			60	60			C25.0	TNM			359	359	unknown		unknown
DO33872	PACA-AU		ICGC_0265	male	deceased	progression	distant recurrence/metastasis	33	33			C25.0	TNM			1009	1009	unknown		unknown
DO33888	PACA-AU		ICGC_0267	female	deceased	progression	distant recurrence/metastasis	75	75			C25.0	TNM			943	943	unknown		unknown
DO33880	PACA-AU		ICGC_0266	female	deceased	progression	distant recurrence/metastasis	59	59			C25.0	TNM			159	159	unknown		unknown
DO33736	PACA-AU		ICGC_0248	female	deceased	progression	distant recurrence/metastasis	66	66			C25.0	TNM			658	658	unknown		unknown
DO33744	PACA-AU		ICGC_0249	male	deceased	progression	distant recurrence/metastasis	75	75			C25.0	TNM			554	554	unknown		unknown
DO33712	PACA-AU		ICGC_0245	female	deceased	progression	local recurrence	67	67			C25.0	TNM			727	727	unknown		unknown
DO33728	PACA-AU		ICGC_0247	male	deceased	progression	distant recurrence/metastasis	55	55			C25.0	TNM			1284	1284	unknown		unknown
DO33720	PACA-AU		ICGC_0246	male	deceased	progression	distant recurrence/metastasis	65	65			C25.0	TNM			1169	1169	unknown		unknown
DO33704	PACA-AU		ICGC_0244	male	deceased	progression	local recurrence	71	71			C25.0	TNM			153	153	unknown		unknown
DO33792	PACA-AU		ICGC_0255	male	deceased	progression	distant recurrence/metastasis	64	64			C25.0	TNM			1112	1112	unknown		unknown
DO33776	PACA-AU		ICGC_0253	female	deceased	progression	distant recurrence/metastasis	70	70			C25.0	TNM			167	167	unknown		unknown
DO33784	PACA-AU		ICGC_0254	male	deceased	progression	distant recurrence/metastasis	48	48			C25.0	TNM			895	895	unknown		unknown
DO33752	PACA-AU		ICGC_0250	male	deceased	progression	distant recurrence/metastasis	76	76			C25.0	TNM			624	624	unknown		unknown
DO33768	PACA-AU		ICGC_0252	female	deceased	progression	distant recurrence/metastasis	65	65			C25.0	TNM			331	331	unknown		unknown
DO33760	PACA-AU		ICGC_0251	female	deceased	progression	distant recurrence/metastasis	64	64			C25.0	TNM			648	648	unknown		unknown

## Sheet: Table 3
ID	normalMean	tumorMean	logFC	pvalue	fdr
cg00001747	0.057198	0.372925	2.70485	6.5659e-06	0.00164533
cg00002719	0.0295071	0.125007	2.08287	0.0066792	0.0397811
cg00003298	0.0337804	0.293449	3.11885	3.40009e-05	0.00206018
cg00017437	0.0614186	0.30541	2.314	6.56601e-06	0.00164533
cg00046625	0.049425	0.253489	2.35861	6.00652e-05	0.00254155
cg00058329	0.0516888	0.299501	2.53464	4.25657e-05	0.00220145
cg00065215	0.0411373	0.251884	2.61424	1.75135e-05	0.00173744
cg00072839	0.0505539	0.271784	2.42657	2.3249e-05	0.00183911
cg00087906	0.0187133	0.179609	3.26272	0.000893035	0.0108588
cg00091285	0.0217947	0.176387	3.0167	2.44678e-05	0.00185539
cg00095594	0.0565725	0.239281	2.08053	0.00255016	0.0210442
cg00097146	0.0786237	0.378816	2.26846	8.58871e-07	0.00164533
cg00129651	0.0681239	0.275753	2.01715	0.00420975	0.0292737
cg00133595	0.0486784	0.253161	2.3787	0.000839348	0.0104496
cg00134776	0.0295808	0.182096	2.62196	9.3144e-06	0.00164602
cg00153110	0.0424281	0.226539	2.41667	4.81708e-05	0.00231926
cg00157796	0.060713	0.253113	2.0597	0.00550812	0.0349731
cg00159100	0.0617253	0.280194	2.18249	0.000128944	0.00362489
cg00179217	0.0662118	0.293996	2.15063	2.77862e-05	0.00193176
cg00229245	0.0154503	0.0724972	2.23029	0.00444471	0.0303283
cg00232735	0.0392475	0.167025	2.0894	0.00285616	0.0226556
cg00240432	0.0561945	0.281823	2.32629	1.38507e-05	0.00166937
cg00243313	0.0284065	0.199448	2.81171	1.42183e-05	0.00167499
cg00246932	0.0448494	0.26722	2.57487	2.3851e-05	0.00185268
cg00251610	0.0468845	0.194362	2.05157	0.000839352	0.0104496
cg00259618	0.0417822	0.19061	2.18967	0.000286601	0.00553006
cg00266286	0.0475463	0.192041	2.01401	6.56596e-06	0.00164533
cg00266322	0.0182768	0.079512	2.12116	0.00460792	0.0310608
cg00267596	0.0160148	0.125103	2.96564	0.0015715	0.0154774
cg00268840	0.0473768	0.287451	2.60106	0.000381831	0.00652221
cg00282249	0.0404047	0.320914	2.98959	2.56509e-06	0.00164533
cg00290506	0.0432127	0.242432	2.48806	0.000725518	0.00957121
cg00304520	0.0399	0.189338	2.2465	2.63835e-06	0.00164533
cg00339556	0.0302116	0.216827	2.84337	3.12213e-06	0.00164533
cg00356183	0.0291419	0.213689	2.87435	0.000116035	0.00344359
cg00382463	0.0530561	0.245767	2.2117	0.00645092	0.038859
cg00400832	0.0729219	0.326033	2.16059	7.41162e-07	0.00164533
cg00421139	0.0453124	0.328419	2.85756	9.71912e-05	0.0031463
cg00505277	0.0278827	0.275339	3.30376	1.79732e-05	0.00174436
cg00516513	0.0518479	0.304599	2.55456	6.62006e-05	0.00264452
cg00522056	0.0199302	0.185398	3.2176	0.000106849	0.00328831
cg00532157	0.0713632	0.306174	2.1011	1.42183e-05	0.00167499
cg00532449	0.0480266	0.226116	2.23516	0.00126225	0.0134905
cg00540891	0.0378794	0.173424	2.19482	0.000788675	0.0100688
cg00544449	0.0555851	0.249987	2.16908	0.00622969	0.0379439
cg00574530	0.025692	0.137421	2.41922	0.000280284	0.00546142
cg00575005	0.0370718	0.184532	2.31547	0.000365471	0.00636044
cg00582881	0.0179036	0.0726088	2.01989	0.00413397	0.0289137
cg00582971	0.0985138	0.486358	2.30362	6.7463e-06	0.00164533
cg00588720	0.0332078	0.163304	2.29797	0.00302141	0.0235237
cg00590670	0.0310058	0.14155	2.19071	0.000528181	0.00790044
cg00596508	0.0396687	0.236083	2.57322	0.000170299	0.0041522
cg00609645	0.0257446	0.135574	2.39674	0.000725514	0.00957121
cg00609966	0.0253841	0.224601	3.14537	0.000135106	0.00370376
cg00615473	0.0358088	0.295191	3.04326	0.000839352	0.0104496
cg00631837	0.0480444	0.218254	2.18357	0.000135106	0.00370376
cg00663077	0.0924099	0.416084	2.17075	7.12118e-06	0.00164533
cg00673251	0.0336763	0.155865	2.2105	0.0030214	0.0235237
cg00674365	0.0961083	0.406741	2.08138	5.72033e-05	0.00248927
cg00690148	0.0500221	0.283315	2.50177	2.84994e-05	0.00194791
cg00703260	0.0161858	0.0844674	2.38366	0.00022902	0.0048641
cg00711088	0.0638128	0.259089	2.02153	2.64105e-05	0.00189781
cg00735962	0.0227687	0.160597	2.81832	0.000373567	0.00644435
cg00745606	0.0419437	0.172692	2.04168	0.000104353	0.00325042
cg00765783	0.0957391	0.395847	2.04776	8.36911e-06	0.00164533
cg00778995	0.0299407	0.251136	3.06829	1.40923e-06	0.00164533
cg00790098	0.0572649	0.254794	2.15361	8.42366e-05	0.0029478
cg00795341	0.0615391	0.267096	2.11778	2.92299e-05	0.00196623
cg00800229	0.0300998	0.168729	2.48688	0.000695732	0.00932002
cg00802728	0.0208796	0.131122	2.65074	0.000805243	0.0101953
cg00804628	0.0400481	0.225716	2.49471	0.000681269	0.00920722
cg00813746	0.270317	0.0528468	-2.35477	0.0019117	0.0174671
cg00819163	0.0174455	0.0991651	2.50698	0.000182435	0.00430247
cg00836482	0.0666113	0.371449	2.47932	0.000186658	0.00434874
cg00851770	0.0353197	0.277985	2.97646	6.62006e-05	0.00264452
cg00852549	0.0366873	0.202509	2.46463	2.99782e-05	0.00197679
cg00852573	0.0165802	0.198649	3.58269	3.07447e-05	0.00199299
cg00853103	0.0480666	0.220601	2.19833	8.82967e-06	0.00164533
cg00853480	0.0311532	0.145966	2.22818	0.00405942	0.0285681
cg00854242	0.039236	0.163289	2.05718	2.3851e-05	0.00185268
cg00862116	0.0484534	0.213108	2.13691	0.0066792	0.0397811
cg00866976	0.0579612	0.253201	2.12712	0.000158926	0.0040121
cg00890041	0.0138135	0.137475	3.31502	0.00893236	0.0483093
cg00890840	0.0215289	0.114861	2.41554	0.00154074	0.0152833
cg00908291	0.041474	0.255246	2.62161	2.92299e-05	0.00196623
cg00909646	0.0476707	0.199362	2.06422	4.58496e-05	0.0022746
cg00926400	0.0525158	0.271028	2.36762	1.45951e-05	0.00168821
cg00942551	0.0238737	0.149711	2.64868	0.00285616	0.0226556
cg00950958	0.0152231	0.120404	2.98355	0.00214703	0.0188199
cg00963169	0.0737879	0.340044	2.20427	2.09825e-05	0.00179687
cg00973677	0.0387744	0.162642	2.06852	4.69966e-05	0.00229741
cg00976453	0.0270793	0.126535	2.22427	0.00591063	0.036664
cg00981837	0.0233643	0.165932	2.82822	4.15212e-05	0.00219458
cg00984146	0.0289426	0.270136	3.22242	0.000135106	0.00370376
cg00986824	0.0513724	0.289493	2.49446	4.35698e-06	0.00164533
cg00989492	0.0187942	0.0794565	2.07988	0.00612165	0.0375168
cg01032359	0.0292145	0.128473	2.13671	0.00103091	0.0118892
cg01033463	0.00740675	0.109446	3.88524	0.000118793	0.00348521
cg01040523	0.0431158	0.19518	2.17852	4.69966e-05	0.00229741
cg01043019	0.0424517	0.199866	2.23514	0.00214704	0.0188199
cg01051310	0.0196023	0.177739	3.18066	0.000613054	0.00864355
cg01052879	0.0411397	0.238613	2.53607	2.15286e-05	0.00180458
cg01054478	0.0770132	0.349725	2.18304	1.62005e-05	0.00172604
cg01064265	0.0334312	0.203254	2.60402	2.3249e-05	0.00183911
cg01070209	0.0514819	0.26429	2.35998	0.000141544	0.00378885
cg01138981	0.0192893	0.0791844	2.03741	0.00126225	0.0134905
cg01141940	0.0178538	0.149858	3.06929	0.00391398	0.0278889
cg01157070	0.0404597	0.199504	2.30186	7.47055e-05	0.00278855
cg01200640	0.0464247	0.275455	2.56885	1.72333e-06	0.00164533
cg01241721	0.0367989	0.168078	2.19139	0.00040766	0.00677584
cg01246835	0.0355024	0.18811	2.40559	1.75133e-05	0.00173744
cg01261798	0.0267806	0.239085	3.15826	3.15298e-05	0.00200871
cg01277542	0.0228133	0.215048	3.23671	0.000114679	0.00340394
cg01278387	0.0296906	0.156029	2.39374	0.000613051	0.00864355
cg01283246	0.0407888	0.319694	2.97045	4.86393e-06	0.00164533
cg01307939	0.0151251	0.202856	3.74544	7.47055e-05	0.00278855
cg01313313	0.0349796	0.178261	2.34941	0.00163472	0.0158722
cg01333350	0.0339961	0.145956	2.10209	0.000178301	0.00425749
cg01350077	0.0527998	0.296683	2.49032	2.77862e-05	0.00193176
cg01360618	0.0601497	0.384032	2.6746	7.12118e-06	0.00164533
cg01369750	0.0601267	0.258398	2.10352	1.99298e-05	0.00177975
cg01383799	0.334431	0.073789	-2.18023	0.00014487	0.00383201
cg01392544	0.0320222	0.325813	3.3469	4.35698e-06	0.00164533
cg01396112	0.0464953	0.224373	2.27074	0.00280292	0.022386
cg01405040	0.0821476	0.397833	2.27587	1.82478e-06	0.00164533
cg01410878	0.02429	0.254627	3.38996	1.42183e-05	0.00167499
cg01419567	0.0338455	0.174893	2.36944	4.36347e-05	0.00222565
cg01419831	0.0423541	0.312319	2.88245	5.73159e-06	0.00164533
cg01423964	0.0147785	0.342309	4.53373	2.35677e-06	0.00164533
cg01436128	0.0419917	0.230807	2.45851	9.56619e-06	0.00164602
cg01445580	0.0851841	0.375445	2.13994	2.7786e-05	0.00193176
cg01445809	0.0189071	0.0847872	2.16492	0.000320236	0.00588773
cg01447112	0.0655754	0.374126	2.5123	6.7463e-06	0.00164533
cg01450705	0.0282666	0.11912	2.07525	0.000128944	0.00362489
cg01452847	0.11663	0.467162	2.00198	3.30151e-06	0.00164533
cg01454487	0.0469051	0.237462	2.33988	1.75135e-05	0.00173744
cg01461410	0.0473527	0.227721	2.26575	0.00014827	0.00387227
cg01464835	0.0744939	0.404928	2.44247	1.45953e-05	0.00168821
cg01508023	0.0332883	0.19108	2.52109	0.00227441	0.019538
cg01519877	0.0489795	0.235218	2.26375	0.00139511	0.0143535
cg01522456	0.0173872	0.129449	2.89629	0.00939396	0.0499684
cg01532168	0.0677317	0.32141	2.24651	0.000166426	0.00410601
cg01535698	0.0366152	0.302186	3.04492	9.56619e-06	0.00164602
cg01535733	0.02375	0.152522	2.68302	0.000725518	0.00957121
cg01543173	0.0283784	0.236263	3.05753	0.000123049	0.00352945
cg01546568	0.0412585	0.206475	2.32321	5.44709e-05	0.00243531
cg01563031	0.0200406	0.101803	2.34478	0.00183868	0.0170745
cg01579950	0.013788	0.168329	3.6098	0.000856904	0.0105881
cg01588748	0.0538142	0.218709	2.02295	2.99782e-05	0.00197679
cg01590753	0.0490135	0.229352	2.22631	5.06031e-05	0.00236462
cg01593190	0.0577314	0.243931	2.07904	9.49088e-05	0.00310747
cg01601746	0.0410704	0.193338	2.23496	0.00173395	0.0164624
cg01614020	0.0266863	0.316249	3.56689	1.38507e-05	0.00166937
cg01638213	0.0535395	0.349481	2.70654	7.12118e-06	0.00164533
cg01638592	0.0161667	0.311355	4.26747	1.7065e-05	0.00173744
cg01645753	0.0690134	0.333621	2.27326	2.3249e-05	0.00183911
cg01649597	0.0314245	0.14392	2.1953	0.00923778	0.0494262
cg01653005	0.0187377	0.18791	3.32603	3.07447e-05	0.00199299
cg01667646	0.0200848	0.167225	3.05761	0.00285616	0.0226556
cg01670677	0.030293	0.234866	2.95478	2.3851e-05	0.00185268
cg01672943	0.0302771	0.273982	3.17778	2.15286e-05	0.00180458
cg01705052	0.0326211	0.301407	3.20783	2.56509e-06	0.00164533
cg01725586	0.0191815	0.160077	3.06097	0.00223121	0.0192804
cg01729717	0.0708444	0.303898	2.10086	3.57494e-05	0.00208716
cg01729827	0.080931	0.375519	2.21412	1.03612e-05	0.00164602
cg01743841	0.0623821	0.375023	2.58778	2.50997e-05	0.00187279
cg01755562	0.0254323	0.188734	2.89162	0.000539596	0.00799203
cg01765249	0.0192793	0.100874	2.38743	0.000306361	0.00575148
cg01775260	0.0223165	0.102596	2.20079	2.99782e-05	0.00197679
cg01777643	0.0681717	0.352771	2.37149	1.15198e-05	0.00165488
cg01781974	0.0227776	0.14827	2.70254	0.00331632	0.0250478
cg01783070	0.0662253	0.319619	2.2709	3.95057e-05	0.00215417
cg01790002	0.0595535	0.260035	2.12645	0.00264865	0.021566
cg01791874	0.0424898	0.21084	2.31096	3.23339e-05	0.00202142
cg01802258	0.0419523	0.389777	3.21583	2.10414e-06	0.00164533
cg01805540	0.0444956	0.343331	2.94787	3.30148e-06	0.00164533
cg01808545	0.0451788	0.189178	2.06603	0.000539596	0.00799203
cg01815529	0.0623068	0.273885	2.13611	0.000256298	0.0051732
cg01815671	0.0647101	0.3399	2.39305	1.34921e-05	0.00166402
cg01821058	0.0468203	0.207573	2.14841	0.000373567	0.00644435
cg01835308	0.0296331	0.200019	2.75485	1.66274e-05	0.00173554
cg01843946	0.0612985	0.263889	2.106	2.44678e-05	0.00185539
cg01869243	0.0285043	0.115625	2.0202	0.000357538	0.0062824
cg01870995	0.0394757	0.223828	2.50336	8.22429e-05	0.00291476
cg01878345	0.092825	0.433265	2.22266	4.01041e-06	0.00164533
cg01882870	0.0647861	0.272883	2.07453	8.09757e-07	0.00164533
cg01893212	0.0684144	0.433353	2.66317	2.3851e-05	0.00185268
cg01911708	0.0182322	0.172945	3.24576	0.000213987	0.00468377
cg01939477	0.0389646	0.338218	3.11772	3.69035e-06	0.00164533
cg01952234	0.0351528	0.251655	2.83973	7.83886e-05	0.00284823
cg01956420	0.0662225	0.372051	2.49011	1.79731e-05	0.00174436
cg01962428	0.0407626	0.179827	2.14129	0.00105214	0.0120377
cg01972751	0.0923817	0.384251	2.05637	1.28014e-05	0.00166402
cg01984858	0.016347	0.192883	3.56063	1.99298e-05	0.00177975
cg01995480	0.0431548	0.281994	2.70807	0.000170299	0.0041522
cg02000882	0.0487972	0.210477	2.10879	0.000357538	0.0062824
cg02002231	0.0211582	0.197115	3.21975	0.00123713	0.0133199
cg02002583	0.0519799	0.275924	2.40824	7.11865e-05	0.00272726
cg02010196	0.0445984	0.209077	2.22897	0.000381831	0.00652221
cg02012576	0.0184117	0.202871	3.46186	1.72333e-06	0.00164533
cg02012703	0.0714133	0.445758	2.642	5.73159e-06	0.00164533
cg02023345	0.0462204	0.273848	2.56677	1.84445e-05	0.00175837
cg02026062	0.0446455	0.210937	2.24023	0.000135106	0.00370376
cg02026160	0.0212202	0.0902405	2.08834	0.00522267	0.0337481
cg02031245	0.0241455	0.167621	2.79538	0.000639539	0.00886453
cg02043159	0.0695479	0.331401	2.2525	2.26613e-05	0.00182449
cg02043600	0.0314758	0.197992	2.65313	0.000874796	0.0107158
cg02052895	0.0261048	0.148273	2.50587	2.92297e-05	0.00196623
cg02071005	0.0612111	0.249264	2.02581	6.15465e-05	0.00256887
cg02081266	0.0492469	0.30778	2.64379	4.47288e-05	0.00225178
cg02087954	0.045757	0.28835	2.65576	4.93728e-05	0.0023408
cg02108033	0.0225245	0.180203	3.00005	7.29259e-05	0.00276012
cg02114924	0.0262925	0.127681	2.27982	9.26772e-05	0.00307861
cg02119363	0.058153	0.269694	2.2134	2.44678e-05	0.00185539
cg02126753	0.0438986	0.195555	2.15533	0.00522269	0.0337481
cg02143877	0.0576874	0.250568	2.11888	0.00180314	0.0168599
cg02145932	0.0180885	0.17844	3.30229	9.3144e-06	0.00164602
cg02147695	0.0260621	0.141232	2.43804	0.000435113	0.00703586
cg02150867	0.0302488	0.125898	2.05731	7.1186e-05	0.00272726
cg02172150	0.0766696	0.344153	2.16633	3.90088e-06	0.00164533
cg02191312	0.024652	0.10624	2.10755	0.000320236	0.00588773
cg02192967	0.0267721	0.185784	2.79482	0.00337835	0.0253529
cg02214096	0.0329158	0.180604	2.45598	2.26615e-05	0.00182449
cg02229757	0.302264	0.0736138	-2.03776	0.000299634	0.00567787
cg02230017	0.0620393	0.297229	2.26032	6.15465e-05	0.00256887
cg02237470	0.0465395	0.297676	2.67721	2.99782e-05	0.00197679
cg02243714	0.0302796	0.171851	2.50474	0.00703525	0.0411956
cg02246645	0.0523857	0.210124	2.00399	8.02933e-05	0.00288067
cg02250846	0.0694186	0.316263	2.18773	1.0543e-06	0.00164533
cg02253760	0.0828959	0.418294	2.33515	8.59644e-06	0.00164533
cg02256049	0.0820328	0.351909	2.10093	4.05017e-05	0.00217541
cg02270183	0.017049	0.0801505	2.23302	0.000528179	0.00790044
cg02279670	0.0185869	0.260249	3.80754	1.18282e-05	0.00165837
cg02281208	0.0846879	0.365277	2.10876	3.90088e-06	0.00164533
cg02291403	0.048548	0.19837	2.03071	2.20881e-05	0.00181872
cg02300154	0.0438967	0.369476	3.0733	7.51587e-06	0.00164533
cg02318926	0.0626124	0.338455	2.43444	5.4271e-06	0.00164533
cg02320740	0.0273076	0.189697	2.79632	3.39486e-06	0.00164533
cg02332982	0.0753438	0.319411	2.08385	3.48648e-05	0.00207707
cg02339682	0.0415206	0.210665	2.34305	3.31575e-05	0.00203812
cg02344833	0.0872041	0.408744	2.22873	7.51593e-06	0.00164533
cg02348751	0.044632	0.249337	2.48195	0.000178302	0.00425749
cg02362467	0.0222047	0.138909	2.64521	4.12289e-06	0.00164533
cg02370395	0.031277	0.18764	2.5848	0.000930573	0.0111484
cg02383130	0.0382959	0.272393	2.83043	1.75135e-05	0.00173744
cg02386420	0.275764	0.0653666	-2.07681	0.000681269	0.00920722
cg02400740	0.0431098	0.233598	2.43794	3.39486e-06	0.00164533
cg02401454	0.0575868	0.318466	2.46733	4.99923e-06	0.00164533
cg02403395	0.0361521	0.193064	2.41692	0.000639539	0.00886453
cg02430347	0.00736353	0.0480102	2.70487	0.00350558	0.0259811
cg02430692	0.0621686	0.255308	2.03798	1.34921e-05	0.00166402
cg02445664	0.0256714	0.151509	2.56117	0.000327392	0.00596799
cg02448922	0.0272184	0.11249	2.04715	0.00173395	0.0164624
cg02450613	0.0207658	0.166553	3.0037	4.15215e-05	0.00219458
cg02456226	0.0845803	0.381928	2.17491	1.00894e-05	0.00164602
cg02457680	0.0835056	0.385301	2.20604	3.03599e-06	0.00164533
cg02467990	0.0576519	0.413335	2.84187	1.21444e-05	0.00166211
cg02478448	0.0760943	0.458031	2.58959	2.04517e-06	0.00164533
cg02483484	0.0299642	0.187307	2.64409	2.3249e-05	0.00183911
cg02494853	0.0176069	0.16289	3.20969	1.1219e-05	0.00164602
cg02510267	0.0461805	0.202716	2.13411	0.00040766	0.00677584
cg02511231	0.0238902	0.362791	3.92465	1.40923e-06	0.00164533
cg02527199	0.0237775	0.132394	2.47716	0.0015715	0.0154774
cg02539855	0.0478355	0.241777	2.33752	0.000114679	0.00340394
cg02543075	0.0235542	0.120079	2.34993	0.000313227	0.00581883
cg02543772	0.0297061	0.170192	2.51833	5.18625e-05	0.00239134
cg02562431	0.0366315	0.218858	2.57884	1.28014e-05	0.00166402
cg02565715	0.0382208	0.204317	2.41838	0.000120197	0.00348833
cg02574509	0.0546901	0.298346	2.44763	1.5784e-05	0.00171836
cg02587316	0.0791533	0.369825	2.22412	6.74624e-06	0.00164533
cg02595832	0.0359103	0.306051	3.09131	5.28073e-06	0.00164533
cg02623991	0.0791854	0.33599	2.08511	0.00014827	0.00387227
cg02649987	0.0321013	0.186683	2.53989	0.000390266	0.00660274
cg02650317	0.0226227	0.173744	2.94112	4.05017e-05	0.00217541
cg02658488	0.0392492	0.167186	2.09072	0.00134049	0.0139944
cg02667667	0.0477855	0.219296	2.19824	9.95253e-05	0.00318178
cg02671880	0.051727	0.234955	2.1834	1.42182e-05	0.00167499
cg02690609	0.0173673	0.0898167	2.37061	6.62002e-05	0.00264452
cg02705837	0.0372403	0.168965	2.18179	0.00703525	0.0411956
cg02725370	0.0504934	0.219	2.11676	7.51593e-06	0.00164533
cg02727363	0.132809	0.032572	-2.02765	0.00313637	0.0241097
cg02728595	0.0471918	0.259829	2.46096	0.00145177	0.0147109
cg02732804	0.0386076	0.220613	2.51456	7.65261e-05	0.00281772
cg02745211	0.0431328	0.319611	2.88946	1.5378e-05	0.00170212
cg02746725	0.0262149	0.202816	2.95171	1.82475e-06	0.00164533
cg02761480	0.0616726	0.31291	2.34304	3.69035e-06	0.00164533
cg02763101	0.0239717	0.247081	3.36558	0.00531632	0.0341531
cg02767771	0.0348808	0.30794	3.14215	8.36911e-06	0.00164533
cg02774186	0.0472515	0.258506	2.45177	0.000182435	0.00430247
cg02797548	0.0138931	0.0960294	2.78911	0.00013829	0.00374748
cg02801786	0.095484	0.400412	2.06815	1.21444e-05	0.00166211
cg02804087	0.0323732	0.17752	2.45511	0.00198738	0.017911
cg02809707	0.0404483	0.252948	2.64469	0.000104353	0.00325042
cg02809746	0.0526897	0.288035	2.45065	8.36911e-06	0.00164533
cg02810156	0.017161	0.0854007	2.31512	0.00107377	0.0122041
cg02824451	0.0223281	0.142492	2.67395	0.0077989	0.0441324
cg02828023	0.0722296	0.293773	2.02404	0.00014827	0.00387227
cg02842227	0.0464092	0.22511	2.27814	1.38506e-05	0.00166937
cg02855576	0.023958	0.101795	2.08709	7.65261e-05	0.00281772
cg02858606	0.0611687	0.256399	2.06752	3.57494e-05	0.00208716
cg02860282	0.0223207	0.148627	2.73524	0.00264864	0.021566
cg02860732	0.0609438	0.304231	2.31962	7.72108e-06	0.00164533
cg02861380	0.0319554	0.243337	2.92883	8.36911e-06	0.00164533
cg02866628	0.0497184	0.245804	2.30566	2.77862e-05	0.00193176
cg02869459	0.0230654	0.210425	3.18951	3.40009e-05	0.00206018
cg02874376	0.0669881	0.324502	2.27625	1.15198e-05	0.00165488
cg02881570	0.0491074	0.306439	2.64158	2.3851e-05	0.00185268
cg02886408	0.058288	0.282491	2.27693	6.56601e-06	0.00164533
cg02899206	0.0385145	0.224282	2.54184	0.00123713	0.0133199
cg02910208	0.0282208	0.160576	2.50842	2.77862e-05	0.00193176
cg02912127	0.0433366	0.255103	2.55742	0.000256297	0.0051732
cg02916312	0.0250131	0.156485	2.64527	0.00131393	0.0138248
cg02943578	0.0639239	0.278706	2.12432	1.75135e-05	0.00173744
cg02946934	0.0485016	0.200133	2.04486	0.000639539	0.00886453
cg02955631	0.0321077	0.159268	2.31047	9.71906e-05	0.0031463
cg02970836	0.111473	0.470721	2.07817	8.59644e-06	0.00164533
cg02974928	0.0360223	0.25834	2.84231	0.0019492	0.0176915
cg02974931	0.0216693	0.113922	2.39432	0.000772424	0.00994205
cg02976568	0.0155214	0.110119	2.82673	0.000182435	0.00430247
cg02978421	0.0516119	0.24618	2.25394	0.000613054	0.00864355
cg02980693	0.018449	0.0768818	2.0591	0.00285616	0.0226556
cg02984614	0.0237163	0.205766	3.11705	0.000293051	0.00560676
cg03005603	0.0350934	0.158046	2.17107	0.000474405	0.00741027
cg03011535	0.0846671	0.342006	2.01415	0.00013829	0.00374748
cg03024760	0.0711654	0.33521	2.23582	6.93132e-06	0.00164533
cg03043296	0.0373997	0.162186	2.11655	0.00151054	0.0150981
cg03044249	0.0713054	0.420574	2.56028	7.93156e-06	0.00164533
cg03053893	0.0149574	0.0670806	2.16503	0.00173395	0.0164624
cg03059131	0.043331	0.299318	2.78821	2.87049e-06	0.00164533
cg03062549	0.0638902	0.297455	2.219	6.56596e-06	0.00164533
cg03063639	0.0634742	0.426929	2.74975	7.93156e-06	0.00164533
cg03064189	0.0179953	0.0919507	2.35324	0.00331632	0.0250478
cg03078363	0.0644605	0.261489	2.02027	0.000141544	0.00378885
cg03092191	0.0476776	0.246699	2.37137	3.48648e-05	0.00207707
cg03109827	0.0692123	0.382708	2.46714	8.59644e-06	0.00164533
cg03112087	0.0470625	0.372686	2.98531	5.18625e-05	0.00239134
cg03117976	0.024555	0.260846	3.40911	0.000155296	0.00395703
cg03127174	0.0415808	0.179212	2.10767	0.00296537	0.0232372
cg03131298	0.0290738	0.147901	2.34684	4.23839e-06	0.00164533
cg03132773	0.0327275	0.212159	2.69657	1.45953e-05	0.00168821
cg03140968	0.0564557	0.25401	2.16969	1.5378e-05	0.00170212
cg03145999	0.0482284	0.262939	2.44677	1.79732e-05	0.00174436
cg03146949	0.0719305	0.371473	2.36858	4.36347e-05	0.00222565
cg03146993	0.0483087	0.201081	2.05742	0.000135105	0.00370376
cg03149560	0.0563873	0.272633	2.27352	0.00014487	0.00383201
cg03157531	0.021754	0.195783	3.1699	0.00111828	0.0125321
cg03159124	0.0367147	0.244851	2.73748	5.8899e-06	0.00164533
cg03167429	0.0283211	0.118188	2.06113	0.00259898	0.0213046
cg03168582	0.0225223	0.209849	3.21993	1.89274e-05	0.00176484
cg03169018	0.052903	0.235383	2.15359	1.45953e-05	0.00168821
cg03175305	0.0377843	0.185379	2.29462	1.5378e-05	0.00170212
cg03184290	0.0941014	0.41392	2.13706	2.95213e-06	0.00164533
cg03203223	0.0130935	0.083432	2.67175	0.00236314	0.0200397
cg03217795	0.0349243	0.269193	2.94634	6.39034e-06	0.00164533
cg03223126	0.0338792	0.190999	2.4951	0.00363721	0.0266015
cg03224572	0.069907	0.369036	2.40025	5.4271e-06	0.00164533
cg03225817	0.0300185	0.220606	2.87755	4.86393e-06	0.00164533
cg03227184	0.0476239	0.278115	2.54592	2.10414e-06	0.00164533
cg03230154	0.0716896	0.338125	2.23772	2.49376e-06	0.00164533
cg03234732	0.0635219	0.279477	2.1374	8.59644e-06	0.00164533
cg03238797	0.0444995	0.276274	2.63424	2.3249e-05	0.00183911
cg03278146	0.032732	0.271877	3.05418	1.5378e-05	0.00170212
cg03286235	0.0159129	0.099979	2.65143	0.0026992	0.0218397
cg03304610	0.0292583	0.269007	3.20073	2.79103e-06	0.00164533
cg03306374	0.0838517	0.502205	2.58236	6.93108e-06	0.00164533
cg03306486	0.0414056	0.204029	2.30087	0.00187487	0.0172708
cg03307465	0.0406503	0.259883	2.67652	7.65256e-05	0.00281772
cg03309232	0.0415049	0.173819	2.06623	0.000667086	0.0090901
cg03315215	0.0306159	0.197655	2.69063	9.3144e-06	0.00164602
cg03315869	0.0176939	0.254776	3.8479	3.57494e-05	0.00208716
cg03323292	0.0156427	0.163984	3.38999	3.57494e-05	0.00208716
cg03324821	0.0447141	0.28445	2.66937	0.000425776	0.00695509
cg03340649	0.0301842	0.174467	2.53109	0.000256298	0.0051732
cg03354113	0.0693115	0.318686	2.20097	0.000262106	0.0052413
cg03357798	0.0823604	0.374606	2.18535	3.48648e-05	0.00207707
cg03376794	0.0436871	0.270404	2.62984	2.79103e-06	0.00164533
cg03387135	0.0307936	0.227987	2.88825	7.51593e-06	0.00164533
cg03394150	0.0218567	0.288939	3.72462	0.000390266	0.00660274
cg03399271	0.0449442	0.19976	2.15206	5.06028e-05	0.00236462
cg03403065	0.0246543	0.182082	2.88467	0.00134049	0.0139944
cg03408556	0.0312471	0.133436	2.09436	5.58213e-05	0.00246243
cg03413465	0.0367334	0.19717	2.42428	9.82448e-06	0.00164602
cg03414318	0.0450103	0.264318	2.55395	2.3851e-05	0.00185268
cg03414474	0.0104519	0.0679341	2.70036	1.1219e-05	0.00164602
cg03425110	0.0461321	0.241809	2.39002	0.000135106	0.00370376
cg03450948	0.0882536	0.360914	2.03193	0.000306361	0.00575148
cg03453638	0.0108453	0.119051	3.45643	0.00200671	0.0180838
cg03453917	0.0531294	0.239334	2.17144	0.0082079	0.0456502
cg03456968	0.0293766	0.149625	2.34862	0.00103091	0.0118892
cg03476087	0.0432743	0.219025	2.33951	4.47288e-05	0.00225178
cg03483150	0.0526966	0.280862	2.41408	8.59644e-06	0.00164533
cg03502002	0.0886713	0.477739	2.42968	7.93156e-06	0.00164533
cg03505117	0.0751483	0.335078	2.15669	7.93156e-06	0.00164533
cg03506640	0.054313	0.273204	2.33061	2.99782e-05	0.00197679
cg03524083	0.0551655	0.258048	2.2258	9.06894e-06	0.00164533
cg03530754	0.0932543	0.444428	2.25271	4.60378e-06	0.00164533
cg03563308	0.0458827	0.206409	2.16948	0.000109401	0.00332759
cg03587557	0.0366235	0.189594	2.37207	5.86177e-05	0.00251334
cg03602280	0.0962133	0.438892	2.18956	1.03612e-05	0.00164602
cg03603951	0.0448402	0.240363	2.42235	0.000239587	0.004981
cg03607359	0.0482368	0.236293	2.29237	0.00460792	0.0310608
cg03611007	0.0463283	0.219705	2.2456	0.00187487	0.0172708
cg03611452	0.0557083	0.33352	2.58181	5.28073e-06	0.00164533
cg03638172	0.0744609	0.30535	2.03591	4.93728e-05	0.0023408
cg03650342	0.0172889	0.0780493	2.17454	0.00024504	0.0050372
cg03659519	0.0575339	0.27631	2.26381	3.8533e-05	0.00213665
cg03671191	0.0123166	0.10746	3.12513	0.00160282	0.0156743
cg03686593	0.0451366	0.319582	2.82382	0.000772424	0.00994205
cg03700449	0.0496539	0.296218	2.57668	8.36911e-06	0.00164533
cg03703637	0.0298469	0.318753	3.41679	3.8533e-05	0.00213665
cg03706273	0.04973	0.260758	2.39053	5.31516e-05	0.0024117
cg03707308	0.0434142	0.174847	2.00986	0.000128944	0.00362489
cg03709091	0.0470739	0.264485	2.49019	0.000262107	0.0052413
cg03711182	0.0257773	0.178066	2.78824	0.000435111	0.00703586
cg03714619	0.0592185	0.352939	2.5753	2.87049e-06	0.00164533
cg03718824	0.0194154	0.170375	3.13344	0.00071048	0.00944519
cg03721362	0.0387348	0.250861	2.69519	0.000213987	0.00468377
cg03734784	0.0212755	0.0869877	2.03162	0.0066792	0.0397811
cg03754311	0.029854	0.146795	2.29781	0.000178302	0.00425749
cg03758150	0.0518286	0.356803	2.78331	3.39486e-06	0.00164533
cg03779241	0.0445906	0.277444	2.63739	9.56619e-06	0.00164602
cg03793804	0.0256728	0.107144	2.06123	0.00218874	0.0190459
cg03801902	0.0414865	0.252675	2.60657	0.00103091	0.0118892
cg03804213	0.059071	0.317031	2.4241	2.09825e-05	0.00179687
cg03813164	0.0590394	0.298674	2.33882	0.00214703	0.0188199
cg03817671	0.0132695	0.069926	2.39772	0.00208583	0.0185229
cg03825010	0.0427375	0.177881	2.05734	1.31424e-05	0.00166402
cg03863616	0.0358552	0.160421	2.16161	0.00107377	0.0122041
cg03884587	0.0336848	0.152084	2.17469	0.000626166	0.00875672
cg03896836	0.0225438	0.168503	2.90197	0.000989629	0.0115811
cg03911502	0.0266428	0.199992	2.90813	0.00014827	0.00387227
cg03951219	0.0516406	0.329935	2.67561	4.73214e-06	0.00164533
cg03958798	0.0449662	0.246222	2.45305	9.10829e-07	0.00164533
cg03963198	0.0457549	0.31591	2.78752	4.60378e-06	0.00164533
cg03966785	0.032718	0.133074	2.02407	0.00849112	0.0467377
cg03970319	0.0452724	0.187155	2.04753	0.000209185	0.00462304
cg03976877	0.0548106	0.291831	2.41261	0.000274098	0.0053823
cg04012266	0.0395112	0.236722	2.58286	4.15215e-05	0.00219458
cg04021697	0.0628	0.377048	2.58591	8.82967e-06	0.00164533
cg04023150	0.0588086	0.301587	2.35847	9.49082e-05	0.00310747
cg04028634	0.0292291	0.135027	2.20777	7.1186e-05	0.00272726
cg04030615	0.0383946	0.268229	2.80449	2.63838e-06	0.00164533
cg04035209	0.0508722	0.226075	2.15185	1.94224e-05	0.00177166
cg04043795	0.0340611	0.163497	2.26307	3.69035e-06	0.00164533
cg04063945	0.0417424	0.252039	2.59406	0.000772424	0.00994205
cg04067139	0.0349796	0.236367	2.75645	0.000274098	0.0053823
cg04077662	0.046097	0.234005	2.3438	3.66554e-05	0.00209878
cg04097639	0.0303956	0.13717	2.17403	0.0020658	0.0183478
cg04105282	0.0381829	0.199217	2.38335	0.00350561	0.0259811
cg04106647	0.0199038	0.206327	3.37382	1.38507e-05	0.00166937
cg04110601	0.0252238	0.12674	2.32901	0.00656417	0.0393327
cg04118306	0.0473164	0.205609	2.11949	2.50995e-05	0.00187279
cg04123776	0.0336848	0.241376	2.84111	4.23839e-06	0.00164533
cg04125371	0.00646416	0.110325	4.09315	0.000454354	0.00722334
cg04136610	0.065277	0.354467	2.44101	1.89274e-05	0.00176484
cg04138185	0.0629667	0.349499	2.47263	2.70901e-05	0.00191704
cg04156369	0.0276887	0.113529	2.03569	0.00357086	0.0263062
cg04171539	0.0315812	0.130026	2.04166	0.0036372	0.0266015
cg04184232	0.060579	0.297478	2.29589	5.28068e-06	0.00164533
cg04184836	0.0512795	0.341766	2.73656	2.3249e-05	0.00183911
cg04188273	0.032316	0.231592	2.84127	1.57841e-05	0.00171836
cg04198308	0.0427173	0.217701	2.34946	0.000695732	0.00932002
cg04205107	0.0322238	0.181227	2.4916	6.78246e-05	0.00266792
cg04209911	0.0423284	0.232082	2.45493	3.23339e-05	0.00202142
cg04210284	0.0169705	0.181203	3.4165	1.49817e-05	0.00169421
cg04245645	0.0380131	0.215366	2.50222	2.64103e-05	0.00189781
cg04272632	0.028667	0.132323	2.2066	0.000454364	0.00722334
cg04292718	0.0122554	0.092416	2.91473	0.000245038	0.0050372
cg04293733	0.0427861	0.287465	2.74817	3.31575e-05	0.00203812
cg04330449	0.0854583	0.386821	2.17837	3.48648e-05	0.00207707
cg04332534	0.0514548	0.320177	2.63749	3.90088e-06	0.00164533
cg04342092	0.0178139	0.187182	3.39337	1.84445e-05	0.00175837
cg04342955	0.0592196	0.332211	2.48795	4.25657e-05	0.00220145
cg04347874	0.0689263	0.445138	2.69113	2.49376e-06	0.00164533
cg04353095	0.0197201	0.255679	3.69659	3.23339e-05	0.00202142
cg04360049	0.0607249	0.2436	2.00415	0.000381831	0.00652221
cg04385144	0.00666101	0.0282802	2.08598	0.000717951	0.00954277
cg04390523	0.0372381	0.268009	2.84743	3.69035e-06	0.00164533
cg04401986	0.0480159	0.236811	2.30215	1.89274e-05	0.00176484
cg04422150	0.0227875	0.092251	2.01733	0.00148089	0.0149029
cg04422562	0.0280152	0.136716	2.28689	1.06399e-05	0.00164602
cg04434339	0.0662479	0.269694	2.02538	0.00014827	0.00387227
cg04454951	0.0586618	0.344197	2.55274	5.28073e-06	0.00164533
cg04462627	0.0269329	0.19964	2.88996	0.000186658	0.00434874
cg04475027	0.0567557	0.346965	2.61195	6.7463e-06	0.00164533
cg04478179	0.0467334	0.191639	2.03587	0.000373567	0.00644435
cg04480903	0.0179446	0.0875793	2.28704	0.00055124	0.00809693
cg04508482	0.0345206	0.249271	2.85218	4.93728e-05	0.0023408
cg04510512	0.0333884	0.219186	2.71473	0.000155295	0.00395703
cg04515996	0.0329187	0.23497	2.8355	6.0524e-06	0.00164533
cg04521510	0.0418139	0.209316	2.32363	0.000740847	0.00969217
cg04534765	0.0865579	0.405533	2.22808	4.73214e-06	0.00164533
cg04543008	0.0340821	0.345943	3.34345	2.35677e-06	0.00164533
cg04549333	0.0568595	0.242616	2.0932	0.000262107	0.0052413
cg04550737	0.0290577	0.244077	3.07034	0.000109401	0.00332759
cg04557544	0.0318818	0.3901	3.61304	1.77334e-06	0.00164533
cg04568492	0.0470459	0.274893	2.54673	1.49817e-05	0.00169421
cg04572161	0.0159974	0.0855823	2.41948	0.00428678	0.029624
cg04575395	0.0381117	0.278368	2.86869	1.49817e-05	0.00169421
cg04578774	0.0398907	0.239491	2.58585	0.000528181	0.00790044
cg04583043	0.0290189	0.119114	2.03728	0.00715767	0.041675
cg04588455	0.287648	0.0555786	-2.3717	0.000229019	0.0048641
cg04597433	0.0997202	0.42288	2.08429	2.22702e-06	0.00164533
cg04612444	0.0548003	0.311025	2.50477	3.21062e-06	0.00164533
cg04620091	0.0235317	0.208151	3.14495	0.000653177	0.00897588
cg04627496	0.0272989	0.148127	2.43992	2.20881e-05	0.00181872
cg04638468	0.0192783	0.26913	3.80325	1.45047e-06	0.00164533
cg04652645	0.0372257	0.200627	2.43014	0.00126226	0.0134905
cg04658772	0.0342286	0.211433	2.62693	0.00114117	0.0126854
cg04669574	0.0527155	0.3195	2.59952	2.92299e-05	0.00196623
cg04672706	0.0369246	0.242412	2.71481	1.79732e-05	0.00174436
cg04673590	0.0569976	0.236332	2.05184	0.00022902	0.0048641
cg04673825	0.0495796	0.254924	2.36225	2.92299e-05	0.00196623
cg04685534	0.0425198	0.179493	2.07772	7.11865e-05	0.00272726
cg04688351	0.071117	0.347306	2.28794	6.78168e-07	0.00164533
cg04701034	0.0659301	0.323983	2.29691	0.00198738	0.017911
cg04704053	0.0383485	0.312892	3.02842	1.53643e-06	0.00164533
cg04707822	0.0212568	0.112759	2.40725	0.00107377	0.0122041
cg04710402	0.0145301	0.183762	3.66072	0.000464285	0.00731319
cg04711998	0.0429647	0.197165	2.19818	0.000218892	0.00474379
cg04723401	0.0441445	0.204902	2.21463	2.26615e-05	0.00182449
cg04741853	0.0286635	0.258428	3.17248	0.000239587	0.004981
cg04747226	0.034073	0.208133	2.6108	2.10414e-06	0.00164533
cg04764012	0.0406401	0.186889	2.20121	6.93132e-06	0.00164533
cg04784475	0.0407288	0.267834	2.71722	3.16605e-06	0.00164533
cg04790084	0.0305521	0.174983	2.51787	0.000349767	0.00620634
cg04823168	0.0200048	0.0901942	2.17269	0.00580759	0.0362357
cg04825327	0.0245321	0.107056	2.12562	0.00503988	0.0329665
cg04832466	0.0264006	0.163711	2.63251	6.56601e-06	0.00164533
cg04842146	0.0258479	0.15192	2.55519	0.00939396	0.0499684
cg04842426	0.0560435	0.282083	2.3315	1.45953e-05	0.00168821
cg04846243	0.0386817	0.243869	2.65638	0.000299637	0.00567787
cg04888241	0.0314056	0.138221	2.13788	0.00154074	0.0152833
cg04904331	0.0320427	0.384818	3.58611	8.82967e-06	0.00164533
cg04917181	0.0536386	0.286728	2.41834	0.000381831	0.00652221
cg04920358	0.031046	0.206108	2.73092	0.000320234	0.00588773
cg04927502	0.0157195	0.130294	3.05115	0.000989629	0.0115811
cg04932544	0.0147385	0.11592	2.97546	3.90088e-06	0.00164533
cg04937080	0.0546693	0.223983	2.03459	0.000756484	0.00981577
cg04945331	0.0632668	0.335519	2.40687	5.57736e-06	0.00164533
cg04981611	0.0335192	0.148314	2.14559	0.000256298	0.0051732
cg04992127	0.0437325	0.261517	2.58013	1.53778e-05	0.00170212
cg05001964	0.0570231	0.230183	2.01316	0.000425773	0.00695509
cg05005301	0.159751	0.0300803	-2.40893	0.00645092	0.038859
cg05009934	0.0352453	0.143543	2.02598	0.000398874	0.00669086
cg05013064	0.0320918	0.160221	2.31979	0.00357086	0.0263062
cg05020604	0.0449617	0.359907	3.00086	3.69035e-06	0.00164533
cg05020625	0.0233661	0.102933	2.13922	0.000989624	0.0115811
cg05022673	0.0318055	0.173464	2.44729	0.00820787	0.0456502
cg05040472	0.0465716	0.238411	2.35593	5.57736e-06	0.00164533
cg05041351	0.0468963	0.195014	2.05603	4.58496e-05	0.0022746
cg05046525	0.0210907	0.134081	2.66843	0.000444641	0.00713033
cg05052324	0.0296269	0.2035	2.78005	1.99298e-05	0.00177975
cg05063138	0.0141519	0.0669658	2.24242	0.00214704	0.0188199
cg05085230	0.0373698	0.233474	2.64331	2.99782e-05	0.00197679
cg05089090	0.0407696	0.293457	2.84758	4.47875e-06	0.00164533
cg05091519	0.0222513	0.126899	2.51172	0.00183868	0.0170745
cg05099508	0.0267117	0.27438	3.36063	6.39034e-06	0.00164533
cg05121790	0.0262292	0.152769	2.5421	0.00391398	0.0278889
cg05134015	0.048396	0.23138	2.25731	9.06894e-06	0.00164533
cg05135549	0.0502173	0.340671	2.76212	1.11758e-06	0.00164533
cg05140069	0.0256675	0.142775	2.47573	1.66273e-05	0.00173554
cg05143123	0.0233206	0.159061	2.76991	0.00878305	0.0477923
cg05143887	0.0245146	0.213765	3.12431	1.24688e-05	0.00166288
cg05151154	0.0497243	0.357727	2.84684	5.57736e-06	0.00164533
cg05157140	0.0302887	0.305078	3.33233	2.26613e-05	0.00182449
cg05166490	0.0294265	0.238416	3.01829	1.5378e-05	0.00170212
cg05168033	0.0171023	0.0907638	2.40793	5.86177e-05	0.00251334
cg05178576	0.0718404	0.308735	2.1035	6.62006e-05	0.00264452
cg05183931	0.0623041	0.266338	2.09586	0.00503988	0.0329665
cg05196969	0.0581388	0.261708	2.17039	2.64105e-05	0.00189781
cg05206884	0.0655877	0.39545	2.592	6.56601e-06	0.00164533
cg05214690	0.0353008	0.259491	2.87791	4.81708e-05	0.00231926
cg05218346	0.0172743	0.128434	2.89433	0.00469153	0.0314299
cg05223720	0.0564533	0.333891	2.56425	2.26615e-05	0.00182449
cg05238769	0.0271678	0.230881	3.08718	3.03599e-06	0.00164533
cg05239311	0.0246479	0.204086	3.04964	0.000740847	0.00969217
cg05241461	0.082223	0.355019	2.11028	9.06894e-06	0.00164533
cg05248618	0.0168402	0.117826	2.80668	0.00202624	0.0181316
cg05250768	0.0280568	0.258633	3.20448	7.11865e-05	0.00272726
cg05251359	0.0357204	0.150285	2.07288	0.000805243	0.0101953
cg05255522	0.0545184	0.263167	2.27116	2.71367e-06	0.00164533
cg05281221	0.0181489	0.114911	2.66257	0.0035056	0.0259811
cg05289253	0.0234368	0.20616	3.13692	0.000506024	0.00769232
cg05295038	0.0205536	0.123227	2.58385	0.00259898	0.0213046
cg05298922	0.0470747	0.282864	2.58708	0.000128944	0.00362489
cg05302386	0.0448726	0.220376	2.29606	0.000822133	0.0103241
cg05309948	0.0554922	0.283192	2.35143	5.86177e-05	0.00251334
cg05310764	0.0405969	0.227979	2.48946	1.00894e-05	0.00164602
cg05311410	0.0682382	0.324748	2.25067	0.000199884	0.0045048
cg05327835	0.0332149	0.238182	2.84216	0.00218875	0.0190459
cg05335955	0.0468826	0.241815	2.36678	0.000856904	0.0105881
cg05336115	0.0443604	0.206806	2.22093	0.00180314	0.0168599
cg05336698	0.0199778	0.207196	3.37453	1.5378e-05	0.00170212
cg05338433	0.0360132	0.225171	2.64442	1.18281e-05	0.00165837
cg05344295	0.037737	0.187716	2.3145	0.0029103	0.0229524
cg05344430	0.0404934	0.17364	2.10034	0.00183868	0.0170745
cg05347845	0.0384395	0.347066	3.17455	2.26615e-05	0.00182449
cg05372242	0.0313979	0.146304	2.22023	5.18625e-05	0.00239134
cg05374412	0.0337683	0.26065	2.94838	9.56619e-06	0.00164602
cg05375728	0.0576553	0.287964	2.32036	7.29259e-05	0.00276012
cg05376374	0.0560745	0.387241	2.78781	7.93156e-06	0.00164533
cg05384102	0.0311038	0.233358	2.90738	2.44674e-05	0.00185539
cg05386493	0.0476937	0.219745	2.20396	0.0026992	0.0218397
cg05396987	0.0665252	0.271993	2.0316	8.84474e-07	0.00164533
cg05403555	0.0291928	0.122918	2.074	0.0018932	0.0174345
cg05415131	0.203295	0.0454126	-2.16241	0.00183868	0.0170745
cg05446629	0.0641033	0.39844	2.63589	5.88985e-06	0.00164533
cg05447008	0.0252111	0.149451	2.56754	0.00183868	0.0170745
cg05452406	0.0708765	0.335762	2.24406	4.23835e-06	0.00164533
cg05460980	0.0175669	0.0935183	2.41239	0.00170027	0.0162543
cg05495949	0.0595191	0.322343	2.43717	7.29259e-05	0.00276012
cg05500840	0.0826547	0.337774	2.03089	2.87049e-06	0.00164533
cg05509659	0.0250371	0.108532	2.11599	0.00173395	0.0164624
cg05513983	0.0307046	0.150739	2.29553	0.00013829	0.00374748
cg05523056	0.0348213	0.202823	2.54218	0.000123049	0.00352945
cg05525743	0.0597591	0.240435	2.00842	3.07447e-05	0.00199299
cg05527869	0.0512588	0.302643	2.56175	0.0016672	0.0160643
cg05542262	0.0137712	0.154128	3.4844	0.00307841	0.0238209
cg05598562	0.0121796	0.180229	3.88729	0.000575234	0.00830657
cg05619587	0.0372918	0.2169	2.5401	2.64105e-05	0.00189781
cg05619888	0.0126552	0.0847612	2.74367	0.00259898	0.0213046
cg05621343	0.0380119	0.226398	2.57434	0.00452566	0.0307052
cg05621401	0.0181369	0.194171	3.42033	0.000357538	0.0062824
cg05624214	0.0233532	0.101696	2.12257	0.000484736	0.00750689
cg05627639	0.0646499	0.43005	2.73379	5.8899e-06	0.00164533
cg05630016	0.0470521	0.275125	2.54776	1.49816e-05	0.00169421
cg05638929	0.0143172	0.105127	2.87632	1.03612e-05	0.00164602
cg05648183	0.0237029	0.119815	2.33767	0.00180314	0.0168599
cg05660179	0.0186442	0.105415	2.49928	0.000856904	0.0105881
cg05661282	0.0415549	0.396476	3.25414	4.99923e-06	0.00164533
cg05663341	0.0464928	0.292628	2.65399	0.000772424	0.00994205
cg05663573	0.0473359	0.282234	2.57588	6.7463e-06	0.00164533
cg05667158	0.0412956	0.17475	2.08123	0.0043651	0.0299745
cg05686497	0.0584831	0.320444	2.45398	4.15215e-05	0.00219458
cg05694245	0.0427483	0.239793	2.48785	0.000327392	0.00596799
cg05719164	0.0330349	0.193338	2.54906	0.00469153	0.0314299
cg05720454	0.0195728	0.18917	3.27276	0.00024504	0.0050372
cg05728754	0.0284238	0.190371	2.74364	1.31424e-05	0.00166402
cg05743346	0.0683138	0.314011	2.20056	1.75135e-05	0.00173744
cg05754435	0.02494	0.117713	2.23874	0.000575234	0.00830657
cg05759718	0.0468149	0.233441	2.31802	0.00255016	0.0210442
cg05766140	0.0509668	0.298513	2.55016	1.99298e-05	0.00177975
cg05783139	0.0568977	0.251235	2.1426	0.000209185	0.00462304
cg05783915	0.0596264	0.333032	2.48164	2.92299e-05	0.00196623
cg05791136	0.0458369	0.204884	2.16023	0.00452566	0.0307052
cg05855039	0.0170913	0.187974	3.45919	6.78246e-05	0.00266792
cg05860723	0.0764449	0.31097	2.02428	5.8898e-06	0.00164533
cg05874732	0.0441812	0.248907	2.4941	3.21062e-06	0.00164533
cg05876738	0.0293548	0.11977	2.02859	0.00420975	0.0292737
cg05884032	0.0430422	0.219076	2.34761	4.86389e-06	0.00164533
cg05888917	0.0348239	0.222274	2.67419	7.29259e-05	0.00276012
cg05901579	0.0538687	0.360424	2.74218	1.66274e-05	0.00173554
cg05916744	0.0209342	0.130017	2.63477	0.000911625	0.0109983
cg05917460	0.041756	0.282632	2.75887	3.75831e-05	0.00211947
cg05924540	0.0495642	0.205821	2.05402	0.000158925	0.0040121
cg05928342	0.069552	0.308548	2.14933	4.99923e-06	0.00164533
cg05950570	0.0337935	0.205831	2.60665	4.25657e-05	0.00220145
cg05984554	0.038635	0.202028	2.38658	1.1219e-05	0.00164602
cg05987650	0.00838614	0.0839825	3.32401	0.00622958	0.0379439
cg05994094	0.0463835	0.225566	2.28187	5.18625e-05	0.00239134
cg05994320	0.0398865	0.167337	2.06879	9.49088e-05	0.00310747
cg05997350	0.0542869	0.243671	2.16626	2.64105e-05	0.00189781
cg06003986	0.0619072	0.254645	2.04031	1.99298e-05	0.00177975
cg06008912	0.0716046	0.290823	2.02202	0.00469153	0.0314299
cg06029846	0.0196993	0.168548	3.09694	1.99296e-05	0.00177975
cg06046431	0.0277568	0.127313	2.19747	9.26772e-05	0.00307861
cg06060135	0.048865	0.385752	2.9808	2.95213e-06	0.00164533
cg06072021	0.0226915	0.152797	2.75139	0.00145176	0.0147109
cg06080005	0.0167253	0.100404	2.58571	0.000125964	0.00357909
cg06082745	0.0298413	0.213289	2.83743	0.000213987	0.00468377
cg06083330	0.056328	0.302936	2.42709	2.79103e-06	0.00164533
cg06094615	0.0414724	0.246698	2.57252	7.12118e-06	0.00164533
cg06118384	0.0378082	0.22074	2.54558	3.23339e-05	0.00202142
cg06122635	0.0480773	0.293971	2.61225	7.31595e-06	0.00164533
cg06123396	0.0288	0.139677	2.27795	8.42366e-05	0.0029478
cg06132028	0.0574546	0.238774	2.05515	3.31575e-05	0.00203812
cg06159486	0.0529978	0.260012	2.29457	2.50997e-05	0.00187279
cg06179060	0.0435806	0.180391	2.04937	0.000495273	0.0076034
cg06181518	0.0382971	0.237665	2.63362	0.00313638	0.0241097
cg06183338	0.092353	0.472389	2.35474	2.22702e-06	0.00164533
cg06191454	0.0442568	0.181842	2.03871	3.40009e-05	0.00206018
cg06204735	0.0829001	0.3695	2.15613	5.86177e-05	0.00251334
cg06204922	0.0577506	0.252505	2.1284	6.00652e-05	0.00254155
cg06213463	0.0173763	0.126983	2.86944	0.00134048	0.0139944
cg06215569	0.088794	0.386486	2.12188	1.93196e-06	0.00164533
cg06223767	0.0465544	0.368652	2.98527	1.34921e-05	0.00166402
cg06241792	0.0296875	0.288213	3.27921	4.15215e-05	0.00219458
cg06248560	0.0651805	0.285603	2.1315	2.84992e-05	0.00194791
cg06262436	0.0403946	0.235538	2.54373	0.000930573	0.0111484
cg06266993	0.03805	0.238682	2.64912	0.000218892	0.00474379
cg06273376	0.0755174	0.322089	2.09258	3.23339e-05	0.00202142
cg06274671	0.0292966	0.121841	2.0562	1.00893e-05	0.00164602
cg06288251	0.0454021	0.2779	2.61373	3.07447e-05	0.00199299
cg06298519	0.0489163	0.221005	2.17569	3.8533e-05	0.00213665
cg06300944	0.0419023	0.177018	2.07879	0.00893236	0.0483093
cg06304097	0.0999626	0.509182	2.34872	9.56619e-06	0.00164602
cg06304401	0.032294	0.153835	2.25205	0.00187487	0.0172708
cg06310816	0.0798436	0.406325	2.34738	3.31575e-05	0.00203812
cg06319822	0.0271655	0.20231	2.89672	8.02939e-05	0.00288067
cg06327407	0.0407932	0.190058	2.22004	0.00121247	0.0131506
cg06338562	0.0471311	0.268339	2.50931	0.000114679	0.00340394
cg06341513	0.034791	0.24506	2.81635	0.000155296	0.00395703
cg06365057	0.0189774	0.0910625	2.26257	7.12118e-06	0.00164533
cg06374165	0.0416452	0.175663	2.07659	0.000613054	0.00864355
cg06377278	0.0358045	0.19678	2.45837	0.00550814	0.0349731
cg06379095	0.0169434	0.0748489	2.14326	0.00893236	0.0483093
cg06382344	0.0387917	0.258725	2.7376	4.23839e-06	0.00164533
cg06392169	0.0337638	0.376099	3.47756	8.14753e-06	0.00164533
cg06395091	0.0124427	0.0569323	2.19394	0.000256298	0.0051732
cg06401021	0.0948468	0.382629	2.01227	0.000123049	0.00352945
cg06419761	0.0388932	0.229335	2.55987	1.94224e-05	0.00177166
cg06431702	0.200683	0.0501036	-2.00193	1.94223e-05	0.00177166
cg06445348	0.0395098	0.342612	3.11629	6.15465e-05	0.00256887
cg06451739	0.0222364	0.140991	2.66461	0.000218892	0.00474379
cg06459443	0.0410756	0.178977	2.12342	0.00146625	0.0148538
cg06463958	0.0503112	0.314004	2.64183	3.31575e-05	0.00203812
cg06479755	0.018685	0.173779	3.2173	1.31423e-05	0.00166402
cg06488775	0.0229285	0.190499	3.05457	0.000575234	0.00830657
cg06500714	0.0214921	0.142923	2.73336	0.00176823	0.0166661
cg06508783	0.144998	0.0319445	-2.18239	0.000141544	0.00378885
cg06523022	0.0197577	0.0939064	2.24881	0.000234248	0.00492802
cg06541501	0.0195616	0.0822049	2.0712	5.86177e-05	0.00251334
cg06543087	0.0428694	0.216674	2.3375	8.02933e-05	0.00288067
cg06546806	0.0639453	0.32259	2.33479	7.83881e-05	0.00284823
cg06563086	0.0153766	0.0796476	2.37289	0.000695732	0.00932002
cg06570167	0.0195658	0.12619	2.68919	0.00331632	0.0250478
cg06572465	0.0566236	0.310881	2.45688	3.03596e-06	0.00164533
cg06598091	0.0381054	0.25044	2.7164	0.00121247	0.0131506
cg06598836	0.112191	0.454755	2.01913	1.31424e-05	0.00166402
cg06610849	0.0938952	0.428315	2.18955	4.35698e-06	0.00164533
cg06611922	0.0456339	0.238324	2.38474	1.84445e-05	0.00175837
cg06613095	0.0364315	0.194812	2.41882	3.15298e-05	0.00200871
cg06616729	0.0677008	0.381757	2.49541	5.57736e-06	0.00164533
cg06622999	0.0176171	0.0866302	2.29789	0.00793315	0.0446092
cg06651311	0.074837	0.304573	2.02497	5.86177e-05	0.00251334
cg06652199	0.0549957	0.231086	2.07104	8.36911e-06	0.00164533
cg06653699	0.0403504	0.241054	2.5787	1.42183e-05	0.00167499
cg06668300	0.0292681	0.138348	2.2409	0.00513055	0.0333649
cg06678279	0.011608	0.0594464	2.35646	0.00131393	0.0138248
cg06679347	0.0492965	0.254385	2.36746	9.49088e-05	0.00310747
cg06682197	0.0389466	0.190114	2.2873	1.7065e-05	0.00173744
cg06714284	0.00787044	0.0648834	3.04333	0.00134047	0.0139944
cg06715976	0.0487586	0.286905	2.55684	0.000320236	0.00588773
cg06716684	0.0224978	0.113228	2.33137	0.000106849	0.00328831
cg06728579	0.0499051	0.253981	2.34746	0.00391398	0.0278889
cg06740600	0.0365704	0.263875	2.85111	8.59644e-06	0.00164533
cg06746118	0.0514184	0.308654	2.58563	0.000162635	0.0040555
cg06747432	0.0239255	0.136972	2.51726	9.95253e-05	0.00318178
cg06750832	0.0588682	0.302047	2.35921	2.15286e-05	0.00180458
cg06759058	0.0272186	0.134335	2.30316	1.79732e-05	0.00174436
cg06781712	0.0435104	0.210505	2.27443	3.8533e-05	0.00213665
cg06782686	0.0302207	0.153392	2.34361	6.94863e-05	0.00269511
cg06785999	0.0470868	0.329979	2.80898	7.51593e-06	0.00164533
cg06818710	0.0348465	0.230926	2.72835	2.09825e-05	0.00179687
cg06831576	0.0789718	0.386742	2.29196	7.9315e-06	0.00164533
cg06872705	0.0629817	0.265845	2.07758	6.39034e-06	0.00164533
cg06873316	0.053011	0.266995	2.33245	3.48648e-05	0.00207707
cg06875227	0.0431308	0.182147	2.07831	0.000299637	0.00567787
cg06890432	0.0240146	0.116271	2.2755	1.28014e-05	0.00166402
cg06893389	0.0210759	0.134625	2.67528	0.0015715	0.0154774
cg06907708	0.0257697	0.114284	2.14888	0.00210606	0.0185856
cg06926782	0.0243231	0.107257	2.14067	0.00014827	0.00387227
cg06947913	0.0287529	0.365984	3.67	3.95057e-05	0.00215417
cg06952671	0.0231416	0.283345	3.614	9.82448e-06	0.00164602
cg06959053	0.0201017	0.187707	3.2231	0.000144869	0.00383201
cg06962944	0.0779918	0.349726	2.16483	6.62002e-05	0.00264452
cg06971129	0.0370617	0.273169	2.88179	6.93132e-06	0.00164533
cg06993118	0.0390894	0.258487	2.72524	0.000109401	0.00332759
cg06997381	0.0185846	0.18098	3.28365	0.00173395	0.0164624
cg07003632	0.0175118	0.132567	2.92032	0.000516992	0.00779572
cg07013734	0.0507679	0.235378	2.21299	8.36904e-06	0.00164533
cg07017374	0.0307338	0.303501	3.3038	8.22429e-05	0.00291476
cg07017901	0.0309994	0.125365	2.01582	0.000280284	0.00546142
cg07025949	0.0283181	0.168324	2.57145	3.57494e-05	0.00208716
cg07028821	0.0519941	0.246913	2.24758	0.000234248	0.00492802
cg07033372	0.0633323	0.328113	2.37318	1.42183e-05	0.00167499
cg07034660	0.0670112	0.271689	2.01948	0.000190972	0.00440102
cg07035503	0.0284759	0.212365	2.89873	0.000135106	0.00370376
cg07060006	0.0470504	0.214916	2.19149	0.000893035	0.0108588
cg07068756	0.056334	0.346189	2.61948	1.89274e-05	0.00176484
cg07071978	0.0527428	0.2261	2.09991	3.23337e-05	0.00202142
cg07072722	0.0361239	0.18987	2.39399	1.45952e-05	0.00168821
cg07080358	0.0391844	0.271284	2.79145	2.84994e-05	0.00194791
cg07090701	0.0507763	0.234792	2.20916	2.99782e-05	0.00197679
cg07107171	0.0516826	0.215526	2.06011	0.000306361	0.00575148
cg07108206	0.0436244	0.206491	2.24287	0.000839352	0.0104496
cg07113642	0.0631028	0.434916	2.78496	7.51593e-06	0.00164533
cg07115542	0.0746142	0.310027	2.05487	0.000587593	0.00842672
cg07122245	0.0362171	0.226254	2.6432	0.000725518	0.00957121
cg07126167	0.0183957	0.169694	3.2055	2.26615e-05	0.00182449
cg07126263	0.0206192	0.106089	2.36321	0.00570618	0.0358027
cg07134065	0.0137795	0.10189	2.88642	0.00344145	0.025668
cg07136998	0.0394057	0.342341	3.11896	7.65261e-05	0.00281772
cg07143418	0.0402948	0.235232	2.54542	6.30623e-05	0.00259378
cg07143532	0.0308465	0.250488	3.02156	5.72033e-05	0.00248927
cg07155336	0.0240209	0.148486	2.62796	0.000430418	0.00702926
cg07161721	0.0534139	0.230691	2.11067	0.0008569	0.0105881
cg07167168	0.0261785	0.164708	2.65346	0.00560637	0.0353912
cg07167946	0.0441672	0.210766	2.2546	3.30151e-06	0.00164533
cg07180307	0.0937164	0.378659	2.01452	1.49817e-05	0.00169421
cg07193766	0.0412746	0.290714	2.81627	2.99782e-05	0.00197679
cg07195011	0.0487667	0.243815	2.32182	0.00277665	0.0223096
cg07213060	0.0506906	0.22777	2.16779	1.15198e-05	0.00165488
cg07218663	0.0299554	0.154363	2.36543	9.06894e-06	0.00164533
cg07219542	0.0265828	0.152709	2.52222	0.00703525	0.0411956
cg07229938	0.0247327	0.122073	2.30325	9.95253e-05	0.00318178
cg07230107	0.0176384	0.153504	3.12149	7.51593e-06	0.00164533
cg07249459	0.0378259	0.209511	2.46958	8.59644e-06	0.00164533
cg07252731	0.0164605	0.276486	4.07013	4.47871e-06	0.00164533
cg07254054	0.0259386	0.108536	2.06501	7.65261e-05	0.00281772
cg07258916	0.0216888	0.166909	2.94403	0.000756484	0.00981577
cg07285995	0.029514	0.120321	2.02741	0.000182435	0.00430247
cg07302069	0.0426622	0.368946	3.11238	2.07444e-06	0.00164533
cg07303244	0.0456658	0.201306	2.1402	0.00766668	0.0436129
cg07319626	0.0150666	0.132964	3.1416	0.00691472	0.0407169
cg07335294	0.0437631	0.187376	2.09815	0.000365471	0.00636044
cg07352438	0.0297247	0.292893	3.30064	7.93156e-06	0.00164533
cg07416383	0.0297964	0.121996	2.03362	0.000151744	0.00391462
cg07421806	0.0193077	0.122003	2.65967	1.31423e-05	0.00166402
cg07434402	0.0399456	0.242904	2.60428	4.47291e-05	0.00225178
cg07438617	0.0267708	0.2419	3.17568	0.000293051	0.00560676
cg07482935	0.0156693	0.102756	2.71321	0.00107377	0.0122041
cg07495363	0.0359803	0.252364	2.81023	2.84994e-05	0.00194791
cg07499241	0.0180739	0.18072	3.32178	4.05017e-05	0.00217541
cg07502439	0.0555662	0.234781	2.07903	9.06894e-06	0.00164533
cg07519816	0.0533211	0.284814	2.41724	2.92297e-05	0.00196623
cg07519873	0.0363543	0.23783	2.70973	7.29259e-05	0.00276012
cg07529575	0.0437889	0.213828	2.28781	0.000223902	0.00480639
cg07529754	0.0602102	0.259419	2.10721	7.93156e-06	0.00164533
cg07533148	0.051784	0.406968	2.97434	2.56509e-06	0.00164533
cg07547000	0.0311665	0.206638	2.72904	5.72033e-05	0.00248927
cg07548607	0.0313217	0.131905	2.07427	2.44678e-05	0.00185539
cg07559273	0.0431157	0.203189	2.23654	0.000464285	0.00731319
cg07561017	0.0274932	0.254954	3.21309	0.000250609	0.00510507
cg07573209	0.0382156	0.291136	2.92946	1.77334e-06	0.00164533
cg07583894	0.0603879	0.264112	2.12882	0.00136755	0.0141741
cg07586272	0.0288229	0.170356	2.56327	0.000474407	0.00741027
cg07589773	0.0461488	0.336778	2.86743	0.00101007	0.011735
cg07594209	0.0426112	0.182192	2.09616	0.00170027	0.0162543
cg07594636	0.049164	0.237653	2.27318	0.000131991	0.00366329
cg07612562	0.0694039	0.303515	2.12868	2.50997e-05	0.00187279
cg07627556	0.0345678	0.182379	2.39944	8.22429e-05	0.00291476
cg07640648	0.0469069	0.188368	2.00568	0.00142318	0.014541
cg07641160	0.0371506	0.25124	2.75761	6.0524e-06	0.00164533
cg07655636	0.0343365	0.234307	2.77058	0.000681269	0.00920722
cg07657064	0.0477022	0.24723	2.37373	0.0022744	0.019538
cg07675334	0.284888	0.0605104	-2.23514	0.00656417	0.0393327
cg07687548	0.04631	0.187601	2.01827	2.15286e-05	0.00180458
cg07690181	0.0393251	0.23933	2.60548	0.00126226	0.0134905
cg07696033	0.0247369	0.115744	2.2262	4.60373e-06	0.00164533
cg07700514	0.0430942	0.335949	2.96268	1.87762e-06	0.00164533
cg07703462	0.0550708	0.26984	2.29274	0.00163472	0.0158722
cg07710481	0.0601473	0.249506	2.0525	8.22429e-05	0.00291476
cg07739205	0.0591682	0.239059	2.01447	0.00134049	0.0139944
cg07749724	0.0324813	0.166604	2.35874	0.000182435	0.00430247
cg07770968	0.0490714	0.338556	2.78644	1.49817e-05	0.00169421
cg07780095	0.0587886	0.311432	2.40531	0.000128944	0.00362489
cg07781035	0.0156699	0.172915	3.464	0.000425773	0.00695509
cg07790615	0.0327728	0.295222	3.17123	1.0543e-06	0.00164533
cg07792478	0.123842	0.495838	2.00137	4.23839e-06	0.00164533
cg07808555	0.0636987	0.288629	2.17988	1.79732e-05	0.00174436
cg07821427	0.0534144	0.316209	2.56558	0.000151745	0.00391462
cg07829842	0.0462683	0.252557	2.44851	6.15465e-05	0.00256887
cg07832473	0.0264058	0.221524	3.06854	2.38508e-05	0.00185268
cg07838603	0.0435749	0.207846	2.25394	1.09258e-05	0.00164602
cg07860213	0.114905	0.476313	2.05147	2.87049e-06	0.00164533
cg07878486	0.0323194	0.169754	2.39298	0.000839352	0.0104496
cg07881405	0.0475401	0.33071	2.79835	3.90088e-06	0.00164533
cg07882671	0.0242616	0.376787	3.957	6.21917e-06	0.00164533
cg07885289	0.0255341	0.129989	2.34789	0.00656417	0.0393327
cg07892785	0.0456309	0.216001	2.24296	0.000474407	0.00741027
cg07893544	0.0298322	0.129574	2.11883	0.00633944	0.0383903
cg07900968	0.0202992	0.230109	3.50282	2.50997e-05	0.00187279
cg07912789	0.0490559	0.334668	2.77023	6.93132e-06	0.00164533
cg07914084	0.0441732	0.305336	2.78915	1.38507e-05	0.00166937
cg07921384	0.0361242	0.248667	2.78318	0.000342155	0.00612046
cg07922007	0.0380564	0.18112	2.25074	0.00541144	0.0345683
cg07926691	0.0507291	0.326606	2.68666	4.99923e-06	0.00164533
cg07931411	0.033581	0.214689	2.67653	5.57736e-06	0.00164533
cg07934812	0.0355106	0.192805	2.44082	4.35698e-06	0.00164533
cg07963234	0.102397	0.415974	2.02232	4.12289e-06	0.00164533
cg07972135	0.0473494	0.277811	2.55269	5.72033e-05	0.00248927
cg07976064	0.0614137	0.385595	2.65045	2.56509e-06	0.00164533
cg07978472	0.0452764	0.304744	2.75077	8.14753e-06	0.00164533
cg08002883	0.0709608	0.335499	2.24122	0.00040766	0.00677584
cg08004425	0.0483309	0.29455	2.6075	4.35698e-06	0.00164533
cg08015447	0.0503391	0.239897	2.25267	1.7065e-05	0.00173744
cg08047376	0.0286831	0.152464	2.41019	5.44709e-05	0.00243531
cg08048222	0.0420489	0.200832	2.25585	0.00606825	0.0374105
cg08050235	0.0195181	0.119038	2.60854	0.00139511	0.0143535
cg08058544	0.0380891	0.176026	2.20834	0.00014827	0.00387227
cg08063125	0.0457461	0.279484	2.61104	2.92299e-05	0.00196623
cg08065231	0.0805152	0.414118	2.36271	8.36904e-06	0.00164533
cg08066943	0.0461969	0.258826	2.48612	4.99923e-06	0.00164533
cg08073312	0.0462279	0.186655	2.01354	9.49088e-05	0.00310747
cg08074851	0.0632916	0.318661	2.33194	1.18282e-05	0.00165837
cg08079580	0.0383113	0.178658	2.22136	1.28014e-05	0.00166402
cg08089301	0.0268565	0.297635	3.4702	9.71912e-05	0.0031463
cg08095196	0.050956	0.247877	2.2823	6.00652e-05	0.00254155
cg08110542	0.0529168	0.212261	2.00404	0.000528181	0.00790044
cg08110874	0.0274906	0.161809	2.55728	7.83886e-05	0.00284823
cg08111446	0.0362343	0.272094	2.90867	0.000190972	0.00440102
cg08114180	0.0217375	0.141975	2.70737	9.95253e-05	0.00318178
cg08119884	0.0524363	0.210058	2.00215	0.000373567	0.00644435
cg08145698	0.0246856	0.125356	2.3443	0.000342155	0.00612046
cg08146483	0.0766859	0.366645	2.25735	5.4271e-06	0.00164533
cg08149193	0.0672981	0.358754	2.41436	7.93156e-06	0.00164533
cg08151857	0.033835	0.29901	3.14361	1.49817e-05	0.00169421
cg08154348	0.0261035	0.13206	2.33887	0.000495271	0.0076034
cg08173515	0.0509247	0.238732	2.22895	4.58496e-05	0.0022746
cg08176368	0.0445772	0.216412	2.2794	0.000539596	0.00799203
cg08182446	0.054975	0.333993	2.60297	3.90088e-06	0.00164533
cg08189989	0.0502574	0.278187	2.46865	1.62731e-06	0.00164533
cg08190291	0.0631158	0.278744	2.14287	4.69966e-05	0.00229741
cg08194313	0.0289163	0.221617	2.93811	0.000239587	0.004981
cg08194879	0.0502361	0.24031	2.2581	0.00128785	0.0136556
cg08204280	0.0517657	0.294392	2.50767	2.3851e-05	0.00185268
cg08217024	0.0329867	0.311615	3.23981	4.60378e-06	0.00164533
cg08228703	0.0354194	0.231527	2.70857	9.56619e-06	0.00164602
cg08235864	0.0423259	0.305147	2.84989	5.88985e-06	0.00164533
cg08236767	0.0652972	0.312789	2.2601	0.000398874	0.00669086
cg08249988	0.0841152	0.366756	2.12438	7.29259e-05	0.00276012
cg08265644	0.0222138	0.0891709	2.00512	0.00131393	0.0138248
cg08272731	0.102671	0.446199	2.11966	4.86393e-06	0.00164533
cg08276289	0.066516	0.296438	2.15596	9.26772e-05	0.00307861
cg08279008	0.0721775	0.318567	2.14197	1.12189e-05	0.00164602
cg08279075	0.0510021	0.244032	2.25844	0.000280284	0.00546142
cg08283882	0.0361486	0.240073	2.73146	0.00071048	0.00944519
cg08288406	0.036284	0.241562	2.73499	9.49088e-05	0.00310747
cg08301572	0.0572923	0.273068	2.25285	3.03599e-06	0.00164533
cg08311403	0.00782412	0.0608269	2.95871	0.000839348	0.0104496
cg08313939	0.0497455	0.316353	2.6689	2.39028e-06	0.00164533
cg08315202	0.106246	0.48207	2.18183	6.0524e-06	0.00164533
cg08322102	0.0552374	0.337565	2.61145	3.8533e-05	0.00213665
cg08323075	0.0473143	0.205217	2.1168	0.00622969	0.0379439
cg08324945	0.034798	0.155094	2.15607	0.000539593	0.00799203
cg08327269	0.0220303	0.118734	2.43018	0.000667082	0.0090901
cg08327532	0.0406837	0.210299	2.36992	1.1219e-05	0.00164602
cg08341316	0.036604	0.16792	2.1977	0.000381831	0.00652221
cg08346159	0.0477344	0.278311	2.5436	0.000155296	0.00395703
cg08347047	0.0586496	0.286592	2.2888	6.7463e-06	0.00164533
cg08377398	0.0626476	0.287418	2.19782	0.00531632	0.0341531
cg08378017	0.0227152	0.156929	2.78838	0.0035056	0.0259811
cg08383315	0.0827424	0.345686	2.06276	1.1219e-05	0.00164602
cg08384637	0.0208419	0.271636	3.70412	0.00019538	0.00445638
cg08391415	0.0246871	0.13233	2.42231	0.00513055	0.0333649
cg08393070	0.0267917	0.218265	3.02623	0.000299637	0.00567787
cg08397273	0.0188878	0.0852725	2.17462	0.00691472	0.0407169
cg08403195	0.0332065	0.135472	2.02846	3.07447e-05	0.00199299
cg08406370	0.0334373	0.246412	2.88155	1.99298e-05	0.00177975
cg08408994	0.031194	0.201357	2.69041	0.000874796	0.0107158
cg08430009	0.0766602	0.359005	2.22746	2.70901e-05	0.00191704
cg08430489	0.0201577	0.125028	2.63285	0.00923778	0.0494262
cg08441170	0.0436175	0.312817	2.84234	0.000104353	0.00325042
cg08447324	0.0253027	0.199926	2.98211	2.04497e-05	0.00179088
cg08448701	0.0657571	0.300396	2.19165	3.66554e-05	0.00209878
cg08452658	0.0205926	0.269329	3.70917	4.93728e-05	0.0023408
cg08460041	0.0464309	0.21456	2.20822	5.86177e-05	0.00251334
cg08464190	0.053734	0.27496	2.35531	0.00024504	0.0050372
cg08475953	0.0993153	0.453588	2.1913	2.29101e-06	0.00164533
cg08480826	0.042899	0.227619	2.4076	1.00894e-05	0.00164602
cg08492619	0.0599297	0.30118	2.32929	0.000131991	0.00366329
cg08495115	0.0323782	0.233401	2.84971	0.000587593	0.00842672
cg08501426	0.0481223	0.22745	2.24077	4.25657e-05	0.00220145
cg08507422	0.0212243	0.21698	3.35377	0.000190972	0.00440102
cg08516516	0.0303607	0.24018	2.98384	1.66273e-05	0.00173554
cg08519216	0.0143539	0.129378	3.17208	0.000334695	0.00604199
cg08526074	0.0592825	0.324747	2.45364	6.62006e-05	0.00264452
cg08550785	0.0448365	0.217	2.27495	0.000193162	0.00445119
cg08553437	0.0315241	0.25557	3.01919	4.86393e-06	0.00164533
cg08567279	0.0374775	0.245761	2.71316	5.73159e-06	0.00164533
cg08572734	0.0501223	0.21853	2.12431	2.92299e-05	0.00196623
cg08575330	0.0393417	0.258251	2.71464	1.38507e-05	0.00166937
cg08586541	0.0262529	0.263487	3.32718	4.86393e-06	0.00164533
cg08594218	0.0715881	0.336204	2.23155	1.79732e-05	0.00174436
cg08597761	0.0396088	0.218136	2.46133	0.000373565	0.00644435
cg08599259	0.0399161	0.188457	2.2392	1.62004e-05	0.00172604
cg08613597	0.0442357	0.254014	2.52162	0.000182435	0.00430247
cg08620044	0.0463588	0.212802	2.1986	1.38507e-05	0.00166937
cg08640634	0.0783542	0.331047	2.07895	3.95057e-05	0.00215417
cg08675717	0.033099	0.252811	2.9332	0.000788675	0.0100688
cg08692175	0.0352872	0.169419	2.26338	0.000681269	0.00920722
cg08696727	0.0475512	0.272579	2.51912	0.00160282	0.0156743
cg08697092	0.0263176	0.176783	2.74788	6.15465e-05	0.00256887
cg08700032	0.0382805	0.202803	2.4054	1.49817e-05	0.00169421
cg08701047	0.0289764	0.230341	2.99082	3.69035e-06	0.00164533
cg08708684	0.0343323	0.319172	3.21669	1.57841e-05	0.00171836
cg08712932	0.0502593	0.251998	2.32595	2.57472e-05	0.00188475
cg08729318	0.0463864	0.245936	2.40651	0.000398874	0.00669086
cg08748671	0.0255168	0.113747	2.15631	0.00126226	0.0134905
cg08748948	0.0361143	0.204353	2.50042	7.1186e-05	0.00272726
cg08753373	0.0417389	0.276246	2.72649	2.15286e-05	0.00180458
cg08768569	0.0507901	0.221849	2.12696	1.24688e-05	0.00166288
cg08768852	0.0958509	0.471724	2.29908	1.1219e-05	0.00164602
cg08769966	0.0218212	0.154823	2.82682	0.000474405	0.00741027
cg08803500	0.0188084	0.0865841	2.20273	0.000123047	0.00352945
cg08806408	0.0437991	0.26737	2.60987	1.09258e-05	0.00164602
cg08832906	0.0925168	0.385175	2.05773	5.31516e-05	0.0024117
cg08850461	0.0935281	0.386299	2.04625	1.24688e-05	0.00166288
cg08853659	0.0178313	0.143214	3.00569	0.00313638	0.0241097
cg08857144	0.0455835	0.298359	2.71046	2.77862e-05	0.00193176
cg08862890	0.034278	0.343039	3.32301	0.000239587	0.004981
cg08870743	0.0453749	0.300835	2.72901	6.39034e-06	0.00164533
cg08871855	0.0591817	0.275322	2.2179	0.00148089	0.0149029
cg08876441	0.0353065	0.236327	2.74278	6.39034e-06	0.00164533
cg08876932	0.0443873	0.251863	2.50442	0.000123048	0.00352945
cg08911275	0.0644916	0.351024	2.44439	0.000327392	0.00596799
cg08917174	0.0328375	0.13826	2.07396	0.00160282	0.0156743
cg08928882	0.0284035	0.193117	2.76534	0.000740851	0.00969217
cg08939095	0.0453989	0.297972	2.71445	4.60378e-06	0.00164533
cg08944430	0.0159465	0.122793	2.94491	0.000280284	0.00546142
cg08958294	0.0843178	0.35011	2.0539	1.84445e-05	0.00175837
cg08964780	0.0568574	0.265155	2.22142	0.000639539	0.00886453
cg08969532	0.0534071	0.251197	2.23372	0.000186658	0.00434874
cg08985029	0.0224309	0.259723	3.53342	3.72364e-07	0.00164533
cg09008705	0.0533195	0.217204	2.02632	0.00363721	0.0266015
cg09009536	0.0447141	0.240596	2.42781	1.38506e-05	0.00166937
cg09010671	0.0626144	0.344098	2.45825	7.65261e-05	0.00281772
cg09011742	0.0229845	0.0980587	2.09298	0.0019117	0.0174671
cg09016242	0.096128	0.441831	2.20046	6.93132e-06	0.00164533
cg09017619	0.0322216	0.276415	3.10074	2.35677e-06	0.00164533
cg09022422	0.0470893	0.282114	2.58281	2.64105e-05	0.00189781
cg09022943	0.046094	0.200511	2.12103	0.000112011	0.003368
cg09048530	0.0373614	0.207153	2.47108	0.000178302	0.00425749
cg09053680	0.0834526	0.416462	2.31916	4.25654e-05	0.00220145
cg09056181	0.0505088	0.210302	2.05786	4.05017e-05	0.00217541
cg09062550	0.0550747	0.269925	2.29309	0.000600195	0.00853639
cg09083627	0.0374583	0.218717	2.54571	1.89274e-05	0.00176484
cg09092054	0.024516	0.185309	2.91813	7.72108e-06	0.00164533
cg09100013	0.0282276	0.140916	2.31966	0.00370468	0.0269002
cg09103619	0.0224488	0.209064	3.21924	4.60378e-06	0.00164533
cg09118932	0.0587933	0.353534	2.58813	1.34921e-05	0.00166402
cg09123431	0.0378569	0.211388	2.48127	1.62005e-05	0.00172604
cg09124223	0.0833313	0.33717	2.01655	8.82967e-06	0.00164533
cg09125430	0.0587658	0.259085	2.14037	0.00109582	0.0123641
cg09130077	0.0307244	0.146667	2.25509	0.000166424	0.00410601
cg09132264	0.0282049	0.126544	2.16562	0.00105214	0.0120377
cg09149648	0.0666921	0.279422	2.06686	0.000178301	0.00425749
cg09150076	0.0325224	0.140676	2.11287	0.00236314	0.0200397
cg09167553	0.0249559	0.202144	3.01793	2.04517e-06	0.00164533
cg09176256	0.0216553	0.105297	2.28167	1.15198e-05	0.00165488
cg09177131	0.0157246	0.124071	2.98006	5.13813e-06	0.00164533
cg09183753	0.0468411	0.215932	2.20473	0.00236314	0.0200397
cg09193347	0.0510298	0.23829	2.2233	6.61997e-05	0.00264452
cg09195198	0.047395	0.265999	2.48862	0.000299637	0.00567787
cg09201151	0.0333525	0.250462	2.90872	0.000320236	0.00588773
cg09234518	0.0516789	0.212119	2.03723	5.72033e-05	0.00248927
cg09236176	0.0337789	0.285359	3.07859	3.03599e-06	0.00164533
cg09238180	0.0520814	0.345505	2.72987	4.35698e-06	0.00164533
cg09273641	0.0201645	0.175968	3.12542	0.00325532	0.0247308
cg09282497	0.0241706	0.121469	2.32926	0.000551238	0.00809693
cg09295573	0.0500252	0.20095	2.00611	0.000293051	0.00560676
cg09310891	0.040734	0.230251	2.4989	0.000613051	0.00864355
cg09313053	0.0257012	0.114895	2.16041	0.00645092	0.038859
cg09321400	0.0951926	0.402869	2.08139	3.39486e-06	0.00164533
cg09359907	0.0178427	0.193464	3.43866	9.56611e-06	0.00164602
cg09360501	0.041551	0.198704	2.25766	0.00656417	0.0393327
cg09360770	0.0483537	0.316207	2.70917	5.44709e-05	0.00243531
cg09371439	0.0223275	0.115072	2.36565	1.1219e-05	0.00164602
cg09424526	0.0466455	0.202422	2.11755	0.000151744	0.00391462
cg09426834	0.0682167	0.359331	2.39712	2.44678e-05	0.00185539
cg09434500	0.032088	0.159305	2.31168	0.000822133	0.0103241
cg09449030	0.0333333	0.136779	2.03681	5.58213e-05	0.00246243
cg09474331	0.0491706	0.395962	3.00949	4.73214e-06	0.00164533
cg09482777	0.0223122	0.101638	2.18753	0.00384305	0.0275516
cg09491991	0.0269301	0.242337	3.16972	0.00154074	0.0152833
cg09493063	0.0378286	0.183481	2.27808	0.00275062	0.022103
cg09493505	0.0761327	0.418677	2.45925	2.3851e-05	0.00185268
cg09507526	0.0400149	0.246341	2.62205	1.28014e-05	0.00166402
cg09511914	0.034884	0.161341	2.20948	0.00923778	0.0494262
cg09513990	0.0789668	0.328443	2.05633	3.03599e-06	0.00164533
cg09515947	0.0435233	0.198109	2.18643	1.89274e-05	0.00176484
cg09524455	0.0325874	0.215665	2.7264	1.84445e-05	0.00175837
cg09527126	0.0608963	0.328607	2.43194	1.31424e-05	0.00166402
cg09528825	0.0328162	0.292114	3.15405	0.000874796	0.0107158
cg09535605	0.035913	0.150192	2.06423	0.000365471	0.00636044
cg09537620	0.0556878	0.305169	2.45418	3.39486e-06	0.00164533
cg09551147	0.0253381	0.18054	2.83294	1.75135e-05	0.00173744
cg09552692	0.169368	0.0324603	-2.38341	4.47291e-05	0.00225178
cg09557387	0.0283044	0.243428	3.1044	0.00350561	0.0259811
cg09558195	0.0524115	0.221386	2.07861	1.38507e-05	0.00166937
cg09568464	0.0177671	0.280121	3.97877	0.000772424	0.00994205
cg09571420	0.0236723	0.147521	2.63965	0.000454364	0.00722334
cg09574088	0.0177637	0.0857706	2.27155	0.00313638	0.0241097
cg09614724	0.0393483	0.173992	2.14465	0.000528181	0.00790044
cg09628838	0.0156741	0.0958095	2.61179	0.000911625	0.0109983
cg09639725	0.0222507	0.112344	2.336	0.00307841	0.0238209
cg09657963	0.0699548	0.292841	2.06562	7.65261e-05	0.00281772
cg09659661	0.0248965	0.200895	3.01243	1.7065e-05	0.00173744
cg09671060	0.0313587	0.145647	2.21553	0.000435113	0.00703586
cg09671258	0.086365	0.435181	2.3331	9.82448e-06	0.00164602
cg09682330	0.0303413	0.223504	2.88094	6.93132e-06	0.00164533
cg09729848	0.0676215	0.279313	2.04633	1.42183e-05	0.00167499
cg09746736	0.0288992	0.233053	3.01156	4.86389e-06	0.00164533
cg09774787	0.0388326	0.289269	2.89707	1.24688e-05	0.00166288
cg09775582	0.0158842	0.224924	3.82377	0.00123713	0.0133199
cg09793584	0.0310849	0.221541	2.83329	0.00357086	0.0263062
cg09804380	0.0270977	0.169667	2.64646	2.04497e-05	0.00179088
cg09813525	0.0524684	0.352114	2.74652	9.3144e-06	0.00164602
cg09831026	0.0395014	0.184075	2.22032	4.69962e-05	0.00229741
cg09835225	0.0851386	0.371892	2.127	3.66554e-05	0.00209878
cg09868336	0.0391678	0.281574	2.84577	3.66554e-05	0.00209878
cg09874822	0.0382482	0.329379	3.10628	9.06894e-06	0.00164533
cg09891129	0.0260471	0.114266	2.13319	0.000506024	0.00769232
cg09894698	0.0343915	0.248483	2.85302	9.49088e-05	0.00310747
cg09918510	0.0337502	0.205289	2.60469	0.00142318	0.014541
cg09935282	0.0405186	0.28116	2.79474	0.000128944	0.00362489
cg09942248	0.0299143	0.149593	2.32213	0.000106849	0.00328831
cg09968723	0.0305575	0.265461	3.1189	0.000114679	0.00340394
cg09969277	0.0753793	0.387165	2.36071	2.04516e-06	0.00164533
cg09971314	0.058894	0.398214	2.75735	2.42434e-06	0.00164533
cg09979478	0.0529551	0.267496	2.33667	5.06031e-05	0.00236462
cg09999109	0.0227291	0.135463	2.57529	0.00486288	0.0321865
cg10016610	0.0129118	0.0520314	2.01069	0.0066792	0.0397811
cg10019132	0.0298041	0.14997	2.33109	0.000989629	0.0115811
cg10021878	0.0588337	0.251603	2.09643	1.66274e-05	0.00173554
cg10023272	0.044342	0.18499	2.0607	1.57841e-05	0.00171836
cg10034890	0.0739568	0.308197	2.0591	8.42366e-05	0.0029478
cg10036918	0.0333295	0.175657	2.39789	0.00024504	0.0050372
cg10037494	0.0599588	0.273164	2.18772	0.00118826	0.0129932
cg10043865	0.056353	0.307903	2.44991	0.000416626	0.00687016
cg10056356	0.037981	0.155098	2.02983	0.000949885	0.0112886
cg10059660	0.0416826	0.188799	2.17933	4.58496e-05	0.0022746
cg10071824	0.0577607	0.260124	2.17104	0.000381831	0.00652221
cg10077401	0.037499	0.194624	2.37577	0.0015715	0.0154774
cg10079740	0.0370511	0.275943	2.89678	0.000141544	0.00378885
cg10080155	0.0116758	0.225431	4.27109	0.000104352	0.00325042
cg10091994	0.032351	0.181206	2.48575	0.00591063	0.036664
cg10096177	0.0197115	0.261918	3.732	9.56611e-06	0.00164602
cg10099415	0.0267303	0.127646	2.2556	9.06894e-06	0.00164533
cg10109500	0.0386302	0.200282	2.37424	9.8244e-06	0.00164602
cg10116864	0.0695368	0.27866	2.00266	7.38101e-05	0.00278855
cg10136354	0.0518392	0.221358	2.09427	0.00679604	0.0402327
cg10166283	0.0352973	0.176755	2.32413	0.0082079	0.0456502
cg10168149	0.0605431	0.353135	2.54418	2.16472e-06	0.00164533
cg10172415	0.0202834	0.0951252	2.22953	0.00319534	0.0244288
cg10173182	0.0245289	0.0982532	2.00202	0.000681269	0.00920722
cg10179911	0.0411573	0.198616	2.27076	4.36347e-05	0.00222565
cg10184889	0.0527309	0.2273	2.10788	2.3249e-05	0.00183911
cg10188732	0.0126652	0.108636	3.10056	0.00128785	0.0136556
cg10188823	0.0447123	0.290336	2.69898	2.9978e-05	0.00197679
cg10192047	0.0158791	0.159641	3.32964	0.00452566	0.0307052
cg10192893	0.0820705	0.35408	2.10914	3.90088e-06	0.00164533
cg10196720	0.0740866	0.333102	2.16868	1.38507e-05	0.00166937
cg10224098	0.0863815	0.406307	2.23378	8.82967e-06	0.00164533
cg10229294	0.0182808	0.151915	3.05487	0.000357536	0.0062824
cg10233825	0.0270568	0.114274	2.07844	0.000274098	0.0053823
cg10237419	0.0450667	0.206081	2.19308	0.00026804	0.00531242
cg10250663	0.0406504	0.349171	3.10259	6.93132e-06	0.00164533
cg10272601	0.0177521	0.179939	3.34144	0.000772424	0.00994205
cg10273340	0.0528601	0.280076	2.40557	0.000190972	0.00440102
cg10293925	0.0456647	0.313424	2.77896	2.9978e-05	0.00197679
cg10297491	0.060151	0.322936	2.42459	0.000166426	0.00410601
cg10303487	0.060559	0.331819	2.45398	1.75135e-05	0.00173744
cg10311806	0.0368726	0.270953	2.87742	4.15215e-05	0.00219458
cg10316490	0.0416323	0.186448	2.163	7.12118e-06	0.00164533
cg10325478	0.049822	0.225814	2.18028	2.3851e-05	0.00185268
cg10332700	0.0204435	0.209565	3.35768	0.000969569	0.011438
cg10333808	0.0807063	0.335926	2.05739	2.04497e-05	0.00179088
cg10334767	0.0559088	0.337235	2.59261	3.66554e-05	0.00209878
cg10341154	0.0332216	0.198739	2.58069	3.31575e-05	0.00203812
cg10356613	0.0625066	0.344503	2.46243	0.000390266	0.00660274
cg10358533	0.0497628	0.354861	2.83411	4.23839e-06	0.00164533
cg10362542	0.0207924	0.27147	3.70666	6.93132e-06	0.00164533
cg10363246	0.0360187	0.225618	2.64706	6.4613e-05	0.00261941
cg10364040	0.104228	0.434975	2.06119	6.93132e-06	0.00164533
cg10364513	0.0418668	0.168672	2.01034	0.000989629	0.0115811
cg10386483	0.0595519	0.318816	2.4205	3.66554e-05	0.00209878
cg10387551	0.0698253	0.293719	2.07261	3.8533e-05	0.00213665
cg10396546	0.0524123	0.210876	2.00842	0.000600198	0.00853639
cg10410142	0.063752	0.277324	2.12103	0.000123049	0.00352945
cg10435816	0.0449317	0.201125	2.16229	7.93156e-06	0.00164533
cg10435849	0.0573195	0.321973	2.48984	0.000162635	0.0040555
cg10437806	0.0434126	0.242096	2.47939	1.00893e-05	0.00164602
cg10439765	0.0792653	0.338561	2.09465	5.8899e-06	0.00164533
cg10448808	0.0568849	0.297189	2.38526	6.93132e-06	0.00164533
cg10451253	0.0357488	0.172898	2.27396	6.56601e-06	0.00164533
cg10453425	0.0392403	0.201989	2.36387	0.00014487	0.00383201
cg10454246	0.0456444	0.279758	2.61567	1.57841e-05	0.00171836
cg10454514	0.029967	0.144181	2.26643	2.50997e-05	0.00187279
cg10469329	0.0251153	0.185528	2.885	0.000286601	0.00553006
cg10471437	0.0348288	0.240633	2.78848	0.000495273	0.0076034
cg10474350	0.0291255	0.176411	2.59859	6.46134e-05	0.00261941
cg10512875	0.0545337	0.28492	2.38534	7.47055e-05	0.00278855
cg10527010	0.0812304	0.339944	2.0652	5.13795e-06	0.00164533
cg10529387	0.0275849	0.135724	2.29873	0.00107377	0.0122041
cg10541517	0.0378346	0.210874	2.47861	1.75135e-05	0.00173744
cg10566121	0.0584189	0.239051	2.03281	0.00325531	0.0247308
cg10569606	0.0298703	0.222239	2.89533	5.13813e-06	0.00164533
cg10583000	0.0301259	0.178732	2.56872	2.15286e-05	0.00180458
cg10601616	0.0325795	0.231748	2.83052	1.77336e-06	0.00164533
cg10606059	0.0186734	0.101879	2.4478	9.95253e-05	0.00318178
cg10615414	0.0324841	0.247113	2.92737	6.56601e-06	0.00164533
cg10617909	0.0956118	0.407883	2.09289	1.7065e-05	0.00173744
cg10636403	0.0651091	0.326428	2.32583	0.000373567	0.00644435
cg10639888	0.0205506	0.128323	2.64252	0.00259898	0.0213046
cg10658542	0.0504992	0.291112	2.52724	1.99298e-05	0.00177975
cg10662314	0.0642902	0.308064	2.26056	0.000209185	0.00462304
cg10664112	0.0342747	0.173591	2.34047	0.000155296	0.00395703
cg10671668	0.0947243	0.383225	2.01639	5.4271e-06	0.00164533
cg10677697	0.0266768	0.107466	2.01022	0.00391398	0.0278889
cg10680051	0.0573014	0.26374	2.20247	0.000313225	0.00581883
cg10694030	0.0271208	0.155547	2.51988	0.000120197	0.00348833
cg10694741	0.0211361	0.0872945	2.04618	0.00160282	0.0156743
cg10715265	0.0438687	0.250765	2.51507	0.000600198	0.00853639
cg10725121	0.010821	0.127724	3.56112	0.00633942	0.0383903
cg10731700	0.0618134	0.3004	2.28089	0.000112011	0.003368
cg10734526	0.0265009	0.18265	2.78497	0.000151745	0.00391462
cg10739095	0.0441286	0.234278	2.40843	6.78246e-05	0.00266792
cg10739556	0.0726188	0.352351	2.2786	8.59644e-06	0.00164533
cg10741153	0.0404457	0.216824	2.42247	4.12289e-06	0.00164533
cg10755235	0.061989	0.298304	2.2667	2.29101e-06	0.00164533
cg10755973	0.0558645	0.253985	2.18474	0.00377328	0.0272381
cg10770742	0.0587511	0.320534	2.44779	6.46134e-05	0.00261941
cg10778841	0.0695154	0.403198	2.53608	9.56611e-06	0.00164602
cg10784386	0.0632911	0.276399	2.12668	2.20881e-05	0.00181872
cg10788735	0.0142629	0.155046	3.44236	0.000725518	0.00957121
cg10795666	0.0604296	0.295126	2.288	0.000454364	0.00722334
cg10800833	0.0414034	0.272043	2.71602	2.71367e-06	0.00164533
cg10808783	0.0474122	0.230221	2.27969	6.78246e-05	0.00266792
cg10814856	0.015806	0.0815132	2.36656	0.000788675	0.0100688
cg10821845	0.0718732	0.314997	2.13181	9.04952e-05	0.00304638
cg10826197	0.0194908	0.185374	3.24957	0.00245502	0.0205242
cg10832304	0.0396977	0.189115	2.25214	0.00444471	0.0303283
cg10858215	0.0238122	0.11702	2.29698	2.26615e-05	0.00182449
cg10863741	0.0166468	0.234669	3.81731	3.12213e-06	0.00164533
cg10864319	0.0669237	0.276224	2.04525	0.000398872	0.00669086
cg10868875	0.0233138	0.186585	3.00057	0.000989629	0.0115811
cg10894566	0.0359765	0.177611	2.30359	0.000805243	0.0101953
cg10904699	0.0407396	0.215034	2.40006	0.00077242	0.00994205
cg10922935	0.0326988	0.260632	2.9947	0.00025061	0.00510507
cg10932068	0.0132335	0.113283	3.09766	0.00187487	0.0172708
cg10959711	0.276645	0.063961	-2.11277	1.75135e-05	0.00173744
cg10972973	0.0527898	0.227493	2.10749	3.8533e-05	0.00213665
cg10979436	0.030843	0.138674	2.16868	0.000725518	0.00957121
cg10979880	0.0185383	0.182683	3.30077	0.00180313	0.0168599
cg10980774	0.0451257	0.249693	2.46814	8.62758e-05	0.00298279
cg10981909	0.0302601	0.254801	3.07388	0.000653174	0.00897588
cg10983544	0.0391337	0.27841	2.83073	6.39034e-06	0.00164533
cg10989300	0.0159262	0.0860689	2.43409	0.00218874	0.0190459
cg11002404	0.0584497	0.25387	2.11882	0.00128785	0.0136556
cg11007931	0.0329321	0.132442	2.00779	8.59644e-06	0.00164533
cg11014373	0.0570773	0.300808	2.39785	3.15298e-05	0.00200871
cg11015038	0.0214024	0.130299	2.60598	0.00786572	0.0444998
cg11017065	0.0406776	0.343677	3.07875	1.24688e-05	0.00166288
cg11021744	0.0346937	0.158786	2.19434	0.000893035	0.0108588
cg11036833	0.0621564	0.327365	2.39693	2.15286e-05	0.00180458
cg11054631	0.0298369	0.130347	2.12719	0.000435113	0.00703586
cg11064255	0.0402751	0.198347	2.30006	0.0019492	0.0176915
cg11074814	0.0601588	0.32783	2.4461	1.03612e-05	0.00164602
cg11108676	0.0331562	0.200695	2.59765	6.46134e-05	0.00261941
cg11131532	0.0307392	0.16078	2.38694	0.00180313	0.0168599
cg11135021	0.0226363	0.121085	2.41931	0.00160282	0.0156743
cg11156672	0.0327304	0.162282	2.3098	0.0011645	0.0128406
cg11167100	0.0358547	0.303789	3.08283	4.58496e-05	0.0022746
cg11197015	0.0239666	0.108662	2.18076	0.00136755	0.0141741
cg11198128	0.0122065	0.147505	3.59504	0.000320236	0.00588773
cg11213520	0.0449702	0.217491	2.27391	6.94863e-05	0.00269511
cg11224582	0.10857	0.436974	2.00892	3.23339e-05	0.00202142
cg11257429	0.0317466	0.170504	2.42513	5.8899e-06	0.00164533
cg11260904	0.0328288	0.186637	2.5072	0.00014827	0.00387227
cg11267955	0.0492487	0.204558	2.05436	0.00612163	0.0375168
cg11279444	0.0490062	0.219029	2.16009	0.000454364	0.00722334
cg11281641	0.0500944	0.258062	2.365	0.00114117	0.0126854
cg11297107	0.0354307	0.167334	2.23966	0.00363721	0.0266015
cg11328303	0.0538201	0.298006	2.46912	6.21917e-06	0.00164533
cg11334771	0.0548514	0.315493	2.52401	4.23839e-06	0.00164533
cg11337945	0.0594825	0.277859	2.22381	2.29101e-06	0.00164533
cg11338643	0.0509724	0.270359	2.40709	5.06031e-05	0.00236462
cg11342468	0.054092	0.281995	2.38218	1.31423e-05	0.00166402
cg11356794	0.0151173	0.141619	3.22774	0.00377329	0.0272381
cg11357746	0.0364842	0.213935	2.55183	7.93156e-06	0.00164533
cg11373604	0.0302835	0.148458	2.29346	0.000280283	0.00546142
cg11381539	0.0799009	0.325198	2.02503	6.9312e-06	0.00164533
cg11385003	0.276274	0.0658458	-2.06894	0.000223901	0.00480639
cg11386792	0.0230748	0.0957289	2.05264	4.69966e-05	0.00229741
cg11388325	0.0182632	0.146535	3.00423	5.72033e-05	0.00248927
cg11389172	0.0639798	0.325916	2.34881	4.36344e-05	0.00222565
cg11398452	0.0665689	0.322103	2.2746	0.00022902	0.0048641
cg11401682	0.0167892	0.138424	3.04349	0.00055124	0.00809693
cg11410023	0.0543822	0.247866	2.18835	0.000416626	0.00687016
cg11414560	0.0604494	0.326814	2.43467	1.24688e-05	0.00166288
cg11416243	0.0250142	0.135906	2.44179	0.000613054	0.00864355
cg11416384	0.0358387	0.307453	3.10078	4.36347e-05	0.00222565
cg11428482	0.0212851	0.132634	2.63954	0.000516992	0.00779572
cg11428724	0.0255381	0.187832	2.87872	0.000342155	0.00612046
cg11430157	0.0311517	0.196458	2.65684	0.000190972	0.00440102
cg11452391	0.0473612	0.22427	2.24346	8.59644e-06	0.00164533
cg11454719	0.0305239	0.157146	2.36409	0.000293051	0.00560676
cg11472279	0.0563912	0.307762	2.44827	0.000306361	0.00575148
cg11497952	0.019539	0.0830758	2.08807	0.00570618	0.0358027
cg11501438	0.0295038	0.181033	2.61728	1.28014e-05	0.00166402
cg11505338	0.0239891	0.118767	2.30768	0.000106849	0.00328831
cg11518846	0.0308162	0.175348	2.50846	5.31512e-05	0.0024117
cg11525479	0.00713429	0.0812484	3.5095	5.50169e-06	0.00164533
cg11527326	0.0348091	0.163945	2.23567	0.0066792	0.0397811
cg11539780	0.0763377	0.314683	2.04343	0.00014827	0.00387227
cg11540007	0.0261014	0.15478	2.56801	0.000151744	0.00391462
cg11564981	0.0404902	0.191464	2.24143	4.15209e-05	0.00219458
cg11573679	0.0281052	0.260151	3.21044	3.66554e-05	0.00209878
cg11591516	0.0165327	0.230614	3.80208	3.66554e-05	0.00209878
cg11592503	0.0798708	0.334205	2.06499	0.000106849	0.00328831
cg11595545	0.0619243	0.433648	2.80795	3.39486e-06	0.00164533
cg11597475	0.0397042	0.23028	2.53603	0.000740847	0.00969217
cg11599539	0.0456995	0.185297	2.01959	0.000135105	0.00370376
cg11601252	0.0487504	0.337074	2.78958	1.18282e-05	0.00165837
cg11610754	0.0334543	0.17954	2.42404	0.00250217	0.0207882
cg11619707	0.0327646	0.246785	2.91304	2.99782e-05	0.00197679
cg11630154	0.0426641	0.205896	2.27082	5.13813e-06	0.00164533
cg11638181	0.0713439	0.316661	2.15008	2.3249e-05	0.00183911
cg11664500	0.0411315	0.249755	2.6022	2.3851e-05	0.00185268
cg11667020	0.0411721	0.170923	2.05361	3.15298e-05	0.00200871
cg11667451	0.0245839	0.18785	2.93379	0.000444641	0.00713033
cg11672037	0.0530024	0.221017	2.06003	0.000563118	0.00820178
cg11712990	0.0368111	0.198382	2.43007	3.15298e-05	0.00200871
cg11721803	0.0439406	0.202121	2.20159	0.000600198	0.00853639
cg11723848	0.0503713	0.219971	2.12664	0.000454364	0.00722334
cg11732619	0.0267528	0.201997	2.91657	0.00176823	0.0166661
cg11747771	0.03312	0.163866	2.30674	0.00679604	0.0402327
cg11758945	0.0314476	0.263789	3.06836	0.000639539	0.00886453
cg11771234	0.0210584	0.105453	2.32413	0.0011645	0.0128406
cg11772919	0.341563	0.0760326	-2.16746	0.000464285	0.00731319
cg11775528	0.0100873	0.0770565	2.93338	0.0066214	0.0396648
cg11797092	0.0239818	0.134365	2.48615	0.000131991	0.00366329
cg11825621	0.0465707	0.274709	2.56041	0.000756484	0.00981577
cg11827837	0.0245871	0.106822	2.11923	0.00469153	0.0314299
cg11835068	0.0444042	0.227165	2.35498	1.82478e-06	0.00164533
cg11842610	0.0690606	0.304225	2.13921	5.18625e-05	0.00239134
cg11854491	0.0397951	0.20251	2.34733	3.66551e-05	0.00209878
cg11876013	0.0533807	0.220723	2.04785	1.86843e-05	0.00176484
cg11878331	0.0575656	0.330946	2.52332	1.72331e-06	0.00164533
cg11881754	0.0546447	0.252057	2.20559	0.000204485	0.00456576
cg11912765	0.0186979	0.143224	2.93732	4.73214e-06	0.00164533
cg11913496	0.0352295	0.152832	2.11709	0.00357086	0.0263062
cg11942956	0.0659017	0.280933	2.09184	5.44709e-05	0.00243531
cg11957331	0.0249203	0.23198	3.21861	4.25657e-05	0.00220145
cg11964564	0.0242381	0.145862	2.58925	0.00139511	0.0143535
cg11979589	0.0355099	0.235674	2.7305	0.00014487	0.00383201
cg11985360	0.0368475	0.215607	2.54877	1.79732e-05	0.00174436
cg12028548	0.0431297	0.185577	2.10526	3.15298e-05	0.00200871
cg12035092	0.0490733	0.256921	2.38832	0.000204485	0.00456576
cg12040830	0.0565863	0.42667	2.9146	5.73159e-06	0.00164533
cg12060744	0.0727186	0.382575	2.39535	5.57736e-06	0.00164533
cg12072560	0.0725279	0.34399	2.24576	2.09825e-05	0.00179687
cg12072964	0.0441582	0.291949	2.72496	3.23339e-05	0.00202142
cg12074025	0.0240475	0.273541	3.5078	0.000772424	0.00994205
cg12075445	0.0599593	0.299829	2.32208	0.000349767	0.00620634
cg12078605	0.0319712	0.168428	2.39729	0.000911625	0.0109983
cg12079322	0.0663497	0.309378	2.22121	9.95253e-05	0.00318178
cg12080391	0.025839	0.182255	2.81833	8.82967e-06	0.00164533
cg12092090	0.0479043	0.199833	2.06057	7.29254e-05	0.00276012
cg12112529	0.0288719	0.229396	2.9901	0.000117408	0.00344601
cg12124922	0.0579563	0.269233	2.21582	0.000182435	0.00430247
cg12127472	0.0926854	0.389931	2.07281	1.21444e-05	0.00166211
cg12146546	0.0207195	0.0982422	2.24536	0.0042868	0.029624
cg12162138	0.0581894	0.340111	2.54718	7.72108e-06	0.00164533
cg12206199	0.0239577	0.133182	2.47484	0.0026992	0.0218397
cg12219082	0.0344358	0.217796	2.661	9.06894e-06	0.00164533
cg12235144	0.0302951	0.128483	2.08442	0.000516992	0.00779572
cg12243375	0.0378721	0.178896	2.23992	1.06399e-05	0.00164602
cg12243597	0.033521	0.292695	3.12626	1.49817e-05	0.00169421
cg12253830	0.0276647	0.159765	2.52984	0.00014487	0.00383201
cg12279877	0.0272447	0.203144	2.89845	9.06894e-06	0.00164533
cg12300498	0.0271803	0.120002	2.14242	0.00180314	0.0168599
cg12300724	0.0487586	0.274172	2.49136	6.78246e-05	0.00266792
cg12314713	0.0763652	0.341529	2.16102	0.000162635	0.0040555
cg12317601	0.0665413	0.289255	2.12002	1.44055e-05	0.00168821
cg12323723	0.0723208	0.318639	2.13944	3.57494e-05	0.00208716
cg12330330	0.0123464	0.0658723	2.41558	0.00793313	0.0446092
cg12343182	0.0335504	0.256304	2.93345	5.44709e-05	0.00243531
cg12353207	0.0392807	0.210891	2.4246	0.000114679	0.00340394
cg12356890	0.0602086	0.355039	2.55994	8.4236e-05	0.0029478
cg12374721	0.0999892	0.457385	2.19356	6.0524e-06	0.00164533
cg12382902	0.0374467	0.195308	2.38284	0.00319534	0.0244288
cg12391690	0.0348621	0.145283	2.05914	0.000204485	0.00456576
cg12395205	0.072291	0.323214	2.1606	1.84445e-05	0.00175837
cg12412079	0.0404711	0.240512	2.57114	0.000114679	0.00340394
cg12417685	0.0219518	0.235251	3.42179	4.81708e-05	0.00231926
cg12426234	0.0333434	0.173404	2.37866	0.000106849	0.00328831
cg12453014	0.0755211	0.356429	2.23866	9.82448e-06	0.00164602
cg12456714	0.0996768	0.408221	2.03402	6.7463e-06	0.00164533
cg12456799	0.0556619	0.264586	2.24898	1.75135e-05	0.00173744
cg12477716	0.0280698	0.374987	3.73975	2.63838e-06	0.00164533
cg12483476	0.0658761	0.336074	2.35095	4.73214e-06	0.00164533
cg12505146	0.0407041	0.20259	2.31532	0.000357538	0.0062824
cg12511214	0.0660945	0.299989	2.18231	7.65261e-05	0.00281772
cg12521353	0.0713997	0.309112	2.11414	0.000893035	0.0108588
cg12523924	0.050664	0.272225	2.42577	1.89274e-05	0.00176484
cg12528713	0.0181832	0.159212	3.13027	0.000416626	0.00687016
cg12530050	0.0451703	0.231099	2.35506	0.000667082	0.0090901
cg12563644	0.0607568	0.246122	2.01825	0.00250217	0.0207882
cg12605662	0.0231137	0.0991625	2.10105	0.000911625	0.0109983
cg12610207	0.0273588	0.179049	2.71028	0.000223902	0.00480639
cg12614213	0.0385228	0.155855	2.01642	0.00679604	0.0402327
cg12622139	0.01157	0.055717	2.26773	0.000178301	0.00425749
cg12628659	0.0361491	0.201917	2.48173	4.15215e-05	0.00219458
cg12629875	0.0294394	0.215679	2.87306	0.000390264	0.00660274
cg12652174	0.0320226	0.173685	2.43931	0.00350561	0.0259811
cg12662072	0.0393937	0.294491	2.90218	6.78246e-05	0.00266792
cg12664209	0.0270215	0.248376	3.20035	0.000444641	0.00713033
cg12668482	0.05389	0.223654	2.05318	2.64105e-05	0.00189781
cg12682684	0.0804599	0.334597	2.05608	4.69966e-05	0.00229741
cg12686016	0.0504778	0.202874	2.00686	0.00255016	0.0210442
cg12686317	0.0250184	0.117233	2.22832	0.00391398	0.0278889
cg12687897	0.0174868	0.0853864	2.28774	0.00645092	0.038859
cg12690148	0.0232122	0.208078	3.16417	0.00337835	0.0253529
cg12691866	0.0133795	0.0700615	2.38859	9.82448e-06	0.00164602
cg12699286	0.025812	0.186854	2.85579	0.00025061	0.00510507
cg12700904	0.0371639	0.23884	2.68407	0.000213987	0.00468377
cg12746059	0.0462912	0.233992	2.33765	8.22424e-05	0.00291476
cg12768681	0.0758561	0.374016	2.30176	1.99298e-05	0.00177975
cg12780678	0.0256274	0.17026	2.73198	1.67466e-06	0.00164533
cg12781700	0.0607552	0.366943	2.59448	7.93156e-06	0.00164533
cg12799689	0.0197309	0.269465	3.77157	6.93132e-06	0.00164533
cg12810096	0.0693928	0.282709	2.02646	4.15212e-05	0.00219458
cg12812583	0.0466013	0.236526	2.34356	0.000125964	0.00357909
cg12825070	0.085459	0.403287	2.2385	6.62006e-05	0.00264452
cg12836011	0.0356104	0.202763	2.50942	4.05017e-05	0.00217541
cg12850078	0.0538807	0.217106	2.01056	0.000613054	0.00864355
cg12859211	0.040499	0.230526	2.50897	0.000158926	0.0040121
cg12860686	0.0600636	0.300645	2.3235	4.47875e-06	0.00164533
cg12861034	0.0557492	0.254153	2.18867	0.00240868	0.020283
cg12863545	0.0320692	0.292253	3.18796	7.72108e-06	0.00164533
cg12869912	0.0514041	0.259565	2.33614	0.000109401	0.00332759
cg12877251	0.0406094	0.277552	2.77287	2.50997e-05	0.00187279
cg12882697	0.0440558	0.206663	2.22988	2.09825e-05	0.00179687
cg12892506	0.0530913	0.30801	2.53643	3.39486e-06	0.00164533
cg12903638	0.0393974	0.167273	2.08603	0.00245502	0.0205242
cg12904880	0.098187	0.491742	2.3243	5.34388e-07	0.00164533
cg12907379	0.0470389	0.220889	2.23139	3.66554e-05	0.00209878
cg12908522	0.0265612	0.154668	2.54178	3.15298e-05	0.00200871
cg12918457	0.0887843	0.420797	2.24475	1.31424e-05	0.00166402
cg12919520	0.0316803	0.216976	2.77588	1.45047e-06	0.00164533
cg12926104	0.0430001	0.209305	2.2832	3.66554e-05	0.00209878
cg12927990	0.0195496	0.122657	2.64943	8.83617e-05	0.00301704
cg12940822	0.0514591	0.269918	2.39102	1.21444e-05	0.00166211
cg12951849	0.0651416	0.290438	2.15658	2.64105e-05	0.00189781
cg12961842	0.0491816	0.220511	2.16466	0.000209185	0.00462304
cg12967001	0.019155	0.124342	2.69852	3.07447e-05	0.00199299
cg12973591	0.0422166	0.27316	2.69386	4.25657e-05	0.00220145
cg12992385	0.031992	0.130461	2.02784	0.00570618	0.0358027
cg12995800	0.0646138	0.276201	2.0958	0.000158926	0.0040121
cg13004587	0.0350474	0.267785	2.93369	0.00210606	0.0185856
cg13019491	0.0865341	0.380426	2.13627	2.15286e-05	0.00180458
cg13021333	0.0672281	0.342115	2.34735	4.99923e-06	0.00164533
cg13042543	0.0282664	0.189452	2.74467	0.000262107	0.0052413
cg13046832	0.0654203	0.311744	2.25255	8.82967e-06	0.00164533
cg13048512	0.0236549	0.141458	2.58016	0.00170027	0.0162543
cg13060997	0.0758347	0.304284	2.00449	8.62758e-05	0.00298279
cg13062406	0.0162476	0.280713	4.11079	3.21062e-06	0.00164533
cg13063344	0.0718525	0.299526	2.05957	3.40009e-05	0.00206018
cg13078140	0.0643261	0.308853	2.26344	1.45953e-05	0.00168821
cg13088368	0.0309924	0.181705	2.55162	3.66554e-05	0.00209878
cg13092806	0.094849	0.414019	2.12599	2.77862e-05	0.00193176
cg13094036	0.0199407	0.177984	3.15796	0.000930573	0.0111484
cg13096208	0.0501531	0.250156	2.31842	9.49082e-05	0.00310747
cg13101087	0.0309469	0.170807	2.4645	5.44709e-05	0.00243531
cg13118906	0.260988	0.0608412	-2.10086	0.00296538	0.0232372
cg13135595	0.0186084	0.206306	3.47076	1.99298e-05	0.00177975
cg13139972	0.0541865	0.30946	2.51375	0.000101912	0.00321628
cg13142700	0.0391462	0.299323	2.93476	1.84445e-05	0.00175837
cg13167664	0.0155579	0.0958704	2.62344	0.000381831	0.00652221
cg13186327	0.0331716	0.146471	2.1426	0.000533855	0.00798431
cg13196826	0.0229972	0.169509	2.88184	0.00541146	0.0345683
cg13202845	0.0521201	0.211933	2.0237	0.000425776	0.00695509
cg13210260	0.0422817	0.179223	2.08365	3.66554e-05	0.00209878
cg13211683	0.0641785	0.315399	2.29702	3.8533e-05	0.00213665
cg13222752	0.0460491	0.365481	2.98855	2.56509e-06	0.00164533
cg13223402	0.0226208	0.140206	2.63183	0.0016672	0.0160643
cg13267264	0.069901	0.428378	2.6155	7.31601e-06	0.00164533
cg13281139	0.0368993	0.260972	2.82223	1.00893e-05	0.00164602
cg13291283	0.0377083	0.171121	2.18207	5.58213e-05	0.00246243
cg13291704	0.0298075	0.222102	2.89748	5.57736e-06	0.00164533
cg13314145	0.0683392	0.38669	2.50039	7.51587e-06	0.00164533
cg13319698	0.0227889	0.0919404	2.01236	0.000756484	0.00981577
cg13324546	0.0686062	0.294481	2.10177	2.20881e-05	0.00181872
cg13325154	0.0193936	0.148254	2.93442	0.00377329	0.0272381
cg13330341	0.0340672	0.14736	2.11289	0.000125963	0.00357909
cg13347257	0.0773141	0.314844	2.02583	8.02939e-05	0.00288067
cg13349651	0.0147845	0.170971	3.53159	1.42183e-05	0.00167499
cg13355047	0.0282169	0.210014	2.89585	0.00363721	0.0266015
cg13356896	0.0554913	0.387066	2.80224	7.51593e-06	0.00164533
cg13371788	0.0292388	0.181983	2.63785	0.00123713	0.0133199
cg13382322	0.0178271	0.0810776	2.18523	0.00206579	0.0183478
cg13393110	0.025017	0.104904	2.06809	0.00118825	0.0129932
cg13404421	0.0298145	0.208445	2.80558	0.00163472	0.0158722
cg13405332	0.0233526	0.154251	2.72362	0.0066792	0.0397811
cg13405783	0.0373188	0.205334	2.46	0.00436511	0.0299745
cg13405887	0.0730663	0.343658	2.2337	0.000506024	0.00769232
cg13407456	0.0611225	0.31755	2.37721	1.7065e-05	0.00173744
cg13426138	0.0244253	0.105496	2.11074	0.00541146	0.0345683
cg13426829	0.0222283	0.113004	2.3459	0.00923778	0.0494262
cg13434638	0.043315	0.186653	2.10742	0.00405942	0.0285681
cg13434989	0.0672414	0.269953	2.00529	6.94863e-05	0.00269511
cg13438893	0.0781254	0.418918	2.4228	2.87049e-06	0.00164533
cg13442432	0.0236719	0.220452	3.21922	0.000199884	0.0045048
cg13442960	0.0359625	0.158473	2.13968	0.000166426	0.00410601
cg13445199	0.0270949	0.270692	3.32056	1.89274e-05	0.00176484
cg13445796	0.0682801	0.419193	2.61808	2.79103e-06	0.00164533
cg13450005	0.0332476	0.227585	2.77508	6.46134e-05	0.00261941
cg13457172	0.0236074	0.253982	3.42742	2.16474e-06	0.00164533
cg13458645	0.039514	0.248696	2.65395	2.64105e-05	0.00189781
cg13461241	0.0615006	0.26747	2.12071	9.3144e-06	0.00164602
cg13463054	0.0323636	0.196665	2.6033	6.15461e-05	0.00256887
cg13464448	0.0419893	0.221682	2.4004	0.000186658	0.00434874
cg13470341	0.0187072	0.0986619	2.3989	8.02939e-05	0.00288067
cg13473356	0.0727928	0.295383	2.02072	4.25657e-05	0.00220145
cg13481132	0.046758	0.288269	2.62413	1.18282e-05	0.00165837
cg13481969	0.0605618	0.245931	2.02177	0.000874796	0.0107158
cg13486410	0.0294261	0.12475	2.08388	0.00728199	0.0421452
cg13488395	0.02243	0.133825	2.57685	0.00715767	0.041675
cg13492103	0.0311446	0.133868	2.10375	8.42366e-05	0.0029478
cg13495205	0.0824371	0.468112	2.50549	1.0855e-06	0.00164533
cg13496979	0.0136133	0.160442	3.55897	0.000104353	0.00325042
cg13498289	0.0293715	0.149528	2.34792	8.62758e-05	0.00298279
cg13512069	0.0167468	0.134497	3.00561	3.30148e-06	0.00164533
cg13513864	0.0194462	0.167606	3.10751	4.15212e-05	0.00219458
cg13525837	0.0155961	0.147645	3.24287	1.89273e-05	0.00176484
cg13534450	0.0407854	0.242105	2.56951	8.42366e-05	0.0029478
cg13536757	0.0153839	0.115896	2.91334	0.0002866	0.00553006
cg13539545	0.0703692	0.451941	2.68312	1.40923e-06	0.00164533
cg13542964	0.0219831	0.194587	3.14595	9.3144e-06	0.00164602
cg13544006	0.0680757	0.288768	2.0847	6.78246e-05	0.00266792
cg13545212	0.0589655	0.247025	2.06671	8.42366e-05	0.0029478
cg13549719	0.0258613	0.116369	2.16984	0.00384305	0.0275516
cg13557668	0.04685	0.248952	2.40974	7.83881e-05	0.00284823
cg13561477	0.0480475	0.194752	2.0191	0.000398874	0.00669086
cg13561592	0.0344508	0.142693	2.0503	0.000600195	0.00853639
cg13562911	0.0223855	0.130798	2.5467	0.000539596	0.00799203
cg13565656	0.0301966	0.215644	2.8362	0.000151745	0.00391462
cg13566610	0.0231656	0.135222	2.54527	0.00331632	0.0250478
cg13567542	0.0956339	0.38341	2.00329	1.40922e-06	0.00164533
cg13592399	0.0172447	0.0986529	2.51621	0.00236314	0.0200397
cg13596833	0.0599651	0.29141	2.28085	2.84994e-05	0.00194791
cg13611347	0.0307368	0.20389	2.72975	7.93156e-06	0.00164533
cg13643914	0.0204421	0.213646	3.38561	5.8899e-06	0.00164533
cg13652513	0.0227032	0.137711	2.60068	8.02939e-05	0.00288067
cg13660664	0.0154298	0.122016	2.98327	0.0015715	0.0154774
cg13668618	0.0456648	0.207622	2.18481	0.000178302	0.00425749
cg13671919	0.0326033	0.168316	2.36809	9.06894e-06	0.00164533
cg13678973	0.0889536	0.394357	2.14837	2.84994e-05	0.00194791
cg13685951	0.0402068	0.204217	2.34459	5.44709e-05	0.00243531
cg13696942	0.0643978	0.286191	2.15189	6.0524e-06	0.00164533
cg13702005	0.0420505	0.321954	2.93666	3.90088e-06	0.00164533
cg13703871	0.0868251	0.406102	2.22566	5.4271e-06	0.00164533
cg13713293	0.0295045	0.15852	2.42566	0.000166426	0.00410601
cg13724160	0.0193497	0.0807301	2.0608	0.00580759	0.0362357
cg13724788	0.0622715	0.284645	2.19252	0.000313227	0.00581883
cg13725782	0.0393394	0.192609	2.29163	0.00541146	0.0345683
cg13730743	0.0153464	0.0978395	2.67252	0.0029103	0.0229524
cg13754661	0.0175837	0.153938	3.13003	7.29259e-05	0.00276012
cg13755795	0.0675199	0.37418	2.47035	1.5378e-05	0.00170212
cg13755796	0.0204903	0.111627	2.44568	0.00231839	0.0197992
cg13759674	0.0500299	0.310633	2.63435	0.00148089	0.0149029
cg13762060	0.0270853	0.110001	2.02193	0.000435113	0.00703586
cg13764991	0.040514	0.239141	2.56137	2.09825e-05	0.00179687
cg13768269	0.0145542	0.104191	2.83973	0.00123713	0.0133199
cg13775316	0.0233413	0.117936	2.33705	0.00591063	0.036664
cg13776340	0.0314833	0.142547	2.17878	0.00250217	0.0207882
cg13794530	0.0568173	0.385572	2.7626	1.09258e-05	0.00164602
cg13796319	0.0157278	0.0827381	2.39524	0.000613054	0.00864355
cg13796823	0.0686604	0.334673	2.2852	2.09824e-05	0.00179687
cg13798300	0.0228126	0.11146	2.28863	0.00580759	0.0362357
cg13807970	0.0557058	0.237909	2.09451	0.000772424	0.00994205
cg13817952	0.0443804	0.198055	2.15791	0.00806948	0.0451172
cg13823136	0.0617147	0.30137	2.28785	6.30619e-05	0.00259378
cg13829550	0.0709022	0.348941	2.29908	8.36911e-06	0.00164533
cg13839457	0.0595466	0.376264	2.65965	6.30623e-05	0.00259378
cg13854983	0.00552551	0.0375011	2.76275	0.0075363	0.0431244
cg13874817	0.0648046	0.262671	2.01909	7.83886e-05	0.00284823
cg13877465	0.0168756	0.101824	2.59307	0.00118826	0.0129932
cg13879483	0.0752106	0.408121	2.43999	4.12289e-06	0.00164533
cg13882278	0.0269366	0.131728	2.28993	3.21059e-06	0.00164533
cg13905586	0.0258003	0.202529	2.97267	0.000101912	0.00321628
cg13906377	0.0588569	0.239346	2.02382	0.0019492	0.0176915
cg13909534	0.0445184	0.212123	2.25243	0.000600198	0.00853639
cg13912115	0.0313696	0.233135	2.89373	1.28014e-05	0.00166402
cg13912117	0.0560745	0.35928	2.67969	1.45953e-05	0.00168821
cg13913015	0.0398432	0.252444	2.66356	0.000474407	0.00741027
cg13916740	0.0136345	0.195786	3.84395	0.000695732	0.00932002
cg13919438	0.0276723	0.189401	2.77492	0.000114679	0.00340394
cg13928709	0.0382938	0.266641	2.79971	4.58496e-05	0.0022746
cg13933262	0.0329701	0.244166	2.88863	3.57494e-05	0.00208716
cg13939859	0.0333548	0.244427	2.87344	1.62731e-06	0.00164533
cg13943217	0.0118982	0.189451	3.99301	2.44678e-05	0.00185539
cg13946520	0.0387103	0.213255	2.46179	0.000398874	0.00669086
cg13950603	0.0497068	0.289219	2.54065	1.21444e-05	0.00166211
cg13952031	0.0223145	0.109084	2.28939	0.00486287	0.0321865
cg13962186	0.0460278	0.256028	2.47572	1.1219e-05	0.00164602
cg13969001	0.0271016	0.166603	2.61996	0.000425776	0.00695509
cg13982529	0.0769476	0.344363	2.16198	5.13813e-06	0.00164533
cg13985726	0.0408909	0.176961	2.11358	0.00223121	0.0192804
cg13996155	0.0216788	0.175424	3.01649	8.42366e-05	0.0029478
cg14000361	0.0430341	0.234487	2.44596	0.000213987	0.00468377
cg14002960	0.084427	0.34378	2.02571	1.24688e-05	0.00166288
cg14005139	0.0242769	0.236514	3.28427	7.65261e-05	0.00281772
cg14007067	0.0448182	0.257762	2.52388	5.13813e-06	0.00164533
cg14007757	0.021635	0.112004	2.37211	0.00210605	0.0185856
cg14015706	0.0473053	0.238402	2.33332	0.000575234	0.00830657
cg14017655	0.0270007	0.225042	3.05912	2.15286e-05	0.00180458
cg14024461	0.0244664	0.173965	2.82992	5.73159e-06	0.00164533
cg14031402	0.0444761	0.199028	2.16187	0.000114679	0.00340394
cg14045872	0.0628415	0.364437	2.53588	6.21917e-06	0.00164533
cg14047019	0.0177263	0.0873485	2.30089	0.0079331	0.0446092
cg14048780	0.0109671	0.0968497	3.14257	0.000495273	0.0076034
cg14055896	0.0534765	0.304852	2.51113	5.4271e-06	0.00164533
cg14056357	0.0212565	0.137325	2.69162	0.00245502	0.0205242
cg14059420	0.0239178	0.123279	2.36577	0.000373563	0.00644435
cg14060111	0.0338928	0.268705	2.98697	0.000170299	0.0041522
cg14060496	0.0577122	0.360079	2.64137	7.93156e-06	0.00164533
cg14073722	0.0650823	0.36102	2.47174	8.82967e-06	0.00164533
cg14093715	0.0358968	0.18604	2.37369	0.000186658	0.00434874
cg14096353	0.0266268	0.17574	2.72249	0.000528181	0.00790044
cg14123923	0.0343853	0.254089	2.88547	1.28014e-05	0.00166402
cg14129397	0.0213073	0.136018	2.67438	0.000125964	0.00357909
cg14135814	0.0406964	0.246829	2.60054	7.11865e-05	0.00272726
cg14140647	0.0336591	0.153376	2.188	0.00275062	0.022103
cg14146100	0.0284616	0.171979	2.59514	7.12118e-06	0.00164533
cg14148055	0.0301979	0.22131	2.87355	0.000141544	0.00378885
cg14159026	0.0412898	0.268251	2.69972	0.000209185	0.00462304
cg14168530	0.042749	0.308991	2.8536	5.73159e-06	0.00164533
cg14168923	0.0365717	0.179001	2.29117	0.00444473	0.0303283
cg14170313	0.0221331	0.207288	3.22736	3.95057e-05	0.00215417
cg14185025	0.0191007	0.144906	2.92342	0.000234248	0.00492802
cg14186641	0.0775698	0.33579	2.11399	0.000327392	0.00596799
cg14209299	0.0454503	0.217619	2.25944	8.82967e-06	0.00164533
cg14214262	0.0244575	0.186076	2.92754	1.98779e-06	0.00164533
cg14215586	0.025491	0.167073	2.71242	0.00893236	0.0483093
cg14218042	0.0298513	0.123362	2.04703	0.0016672	0.0160643
cg14230666	0.0517331	0.312392	2.5942	5.28073e-06	0.00164533
cg14248715	0.0581461	0.272787	2.23002	3.23339e-05	0.00202142
cg14249876	0.0500905	0.315083	2.65312	0.000213987	0.00468377
cg14250833	0.0328833	0.178548	2.44088	5.4271e-06	0.00164533
cg14251622	0.0249614	0.242099	3.27782	0.000874796	0.0107158
cg14252519	0.0615554	0.349894	2.50696	0.000245039	0.0050372
cg14256587	0.0525049	0.259038	2.30264	1.24687e-05	0.00166288
cg14266251	0.0283172	0.117168	2.04883	0.000416626	0.00687016
cg14267095	0.0705457	0.318037	2.17256	2.70901e-05	0.00191704
cg14267263	0.0179163	0.119268	2.73486	4.15215e-05	0.00219458
cg14271531	0.0416105	0.215922	2.37549	1.38507e-05	0.00166937
cg14287112	0.038826	0.239969	2.62775	1.84445e-05	0.00175837
cg14304817	0.0637723	0.255271	2.00103	0.000131991	0.00366329
cg14306734	0.043353	0.264645	2.60985	0.0016672	0.0160643
cg14306956	0.0422531	0.248002	2.55323	0.000158926	0.0040121
cg14324370	0.0443289	0.289082	2.70516	3.95057e-05	0.00215417
cg14335894	0.0492179	0.204109	2.05209	4.81708e-05	0.00231926
cg14343214	0.0373162	0.200029	2.42234	1.66274e-05	0.00173554
cg14347088	0.0449104	0.196612	2.13023	6.0524e-06	0.00164533
cg14353137	0.0582983	0.282263	2.27552	4.15215e-05	0.00219458
cg14362630	0.035509	0.221884	2.64355	0.000681269	0.00920722
cg14369938	0.0518985	0.275895	2.41035	2.84994e-05	0.00194791
cg14373923	0.0571489	0.252395	2.14289	3.8533e-05	0.00213665
cg14388858	0.02749	0.124588	2.18018	0.00128785	0.0136556
cg14394692	0.0376749	0.24888	2.72377	4.47875e-06	0.00164533
cg14409023	0.0588572	0.271332	2.20477	0.000151745	0.00391462
cg14409941	0.0221924	0.226061	3.34858	0.000104353	0.00325042
cg14416371	0.0494924	0.418859	3.08119	2.95213e-06	0.00164533
cg14441976	0.0480758	0.312865	2.70216	1.31424e-05	0.00166402
cg14453201	0.0517509	0.244649	2.24105	0.000158926	0.0040121
cg14458834	0.0244529	0.322829	3.72269	6.78246e-05	0.00266792
cg14470895	0.0509581	0.285838	2.48782	2.57472e-05	0.00188475
cg14473102	0.131707	0.534645	2.02125	1.98779e-06	0.00164533
cg14473327	0.0398675	0.236787	2.5703	6.00648e-05	0.00254155
cg14485004	0.0357521	0.232506	2.70116	0.000114679	0.00340394
cg14487131	0.0494966	0.354595	2.84077	1.7065e-05	0.00173744
cg14492293	0.0360777	0.206299	2.51556	1.99298e-05	0.00177975
cg14492800	0.0301089	0.257184	3.09454	4.69966e-05	0.00229741
cg14496450	0.0194862	0.233016	3.5799	1.24688e-05	0.00166288
cg14502484	0.0860144	0.398066	2.21036	1.28014e-05	0.00166402
cg14507337	0.05751	0.293788	2.35289	5.06031e-05	0.00236462
cg14507560	0.0492972	0.389	2.98019	1.03612e-05	0.00164602
cg14507868	0.0788311	0.321718	2.02896	5.86177e-05	0.00251334
cg14510404	0.0248258	0.107696	2.11706	0.000969569	0.011438
cg14510812	0.0313349	0.263877	3.07402	6.93126e-06	0.00164533
cg14520424	0.0408346	0.19691	2.26967	5.44709e-05	0.00243531
cg14526047	0.0252173	0.180245	2.83748	2.3249e-05	0.00183911
cg14537362	0.0142563	0.0856726	2.58724	0.00405942	0.0285681
cg14556070	0.0221984	0.17961	3.01634	0.00337835	0.0253529
cg14562712	0.0394188	0.274061	2.79754	9.04952e-05	0.00304638
cg14568217	0.039928	0.168414	2.07654	0.00259898	0.0213046
cg14575559	0.114758	0.0247806	-2.21131	6.46134e-05	0.00261941
cg14587524	0.0519732	0.437098	3.07212	2.71367e-06	0.00164533
cg14597534	0.0205927	0.220338	3.41951	4.05017e-05	0.00217541
cg14602341	0.0282113	0.120094	2.08982	0.000632817	0.00884685
cg14603098	0.0580711	0.364127	2.64855	5.57736e-06	0.00164533
cg14614314	0.0354199	0.186478	2.39637	0.00728199	0.0421452
cg14625113	0.083516	0.342383	2.03549	4.25657e-05	0.00220145
cg14625175	0.076943	0.365741	2.24896	0.00013829	0.00374748
cg14648916	0.0216618	0.1782	3.04027	0.00145177	0.0147109
cg14649650	0.0482693	0.307532	2.67156	1.66274e-05	0.00173554
cg14650577	0.0157435	0.0843438	2.42153	0.00296538	0.0232372
cg14650610	0.0411469	0.315006	2.93652	7.1186e-05	0.00272726
cg14653281	0.0344126	0.14005	2.02493	0.000839352	0.0104496
cg14654886	0.0958616	0.43608	2.18557	4.05017e-05	0.00217541
cg14657517	0.0569405	0.291631	2.35662	1.89274e-05	0.00176484
cg14658804	0.0349588	0.320297	3.19568	7.47055e-05	0.00278855
cg14660839	0.0153956	0.210892	3.77591	0.000839352	0.0104496
cg14662355	0.0554726	0.237174	2.0961	1.38506e-05	0.00166937
cg14667871	0.0612431	0.276917	2.17683	0.000117408	0.00344601
cg14669274	0.104699	0.431518	2.04317	7.93156e-06	0.00164533
cg14678099	0.0176789	0.127348	2.84868	7.83886e-05	0.00284823
cg14696396	0.0684222	0.382812	2.4841	2.64103e-05	0.00189781
cg14700304	0.0469973	0.260243	2.46921	0.000563118	0.00820178
cg14703605	0.0366352	0.186732	2.34967	0.000149997	0.00391462
cg14704758	0.0328916	0.133519	2.02126	0.00703525	0.0411956
cg14725641	0.0127476	0.0857552	2.75	0.0088574	0.0481824
cg14743594	0.0212182	0.16546	2.96311	0.00014827	0.00387227
cg14747563	0.0517681	0.222083	2.10096	0.00280294	0.022386
cg14749465	0.0420874	0.1891	2.16769	0.000435113	0.00703586
cg14763548	0.063114	0.329585	2.38462	0.00014827	0.00387227
cg14768785	0.0393029	0.242235	2.6237	2.35677e-06	0.00164533
cg14811608	0.0208715	0.0885336	2.08469	0.000425776	0.00695509
cg14817655	0.080043	0.330793	2.04708	1.62005e-05	0.00172604
cg14843800	0.0140754	0.156083	3.47107	1.42183e-05	0.00167499
cg14867569	0.0108501	0.102807	3.24416	0.00111829	0.0125321
cg14872657	0.0526734	0.27387	2.37834	1.06399e-05	0.00164602
cg14874750	0.0309828	0.257801	3.05672	4.05017e-05	0.00217541
cg14885748	0.0957772	0.384855	2.00656	5.13813e-06	0.00164533
cg14889643	0.0443262	0.183698	2.0511	0.000464285	0.00731319
cg14894823	0.0197264	0.124796	2.66137	0.000911625	0.0109983
cg14896516	0.0389972	0.218366	2.4853	0.00495067	0.0325666
cg14921743	0.0178023	0.200792	3.49556	0.00118826	0.0129932
cg14923640	0.0409724	0.204579	2.31994	0.000805243	0.0101953
cg14930075	0.0771269	0.308855	2.00163	0.000365471	0.00636044
cg14931230	0.0404033	0.180876	2.16246	0.00022902	0.0048641
cg14932016	0.0747691	0.32757	2.13129	0.000128944	0.00362489
cg14936269	0.0381213	0.236196	2.63131	0.000327392	0.00596799
cg14943877	0.0101741	0.0545201	2.42189	0.00142318	0.014541
cg14944647	0.0505491	0.312121	2.62635	1.34921e-05	0.00166402
cg14953590	0.0363707	0.173275	2.25221	0.0002866	0.00553006
cg14965220	0.0227666	0.16125	2.82431	2.23729e-05	0.00182449
cg14999001	0.0321511	0.290831	3.17724	0.000639539	0.00886453
cg15015920	0.0378293	0.194293	2.36065	4.01041e-06	0.00164533
cg15020425	0.032708	0.151414	2.21079	0.000148269	0.00387227
cg15031661	0.0720998	0.429981	2.5762	1.03612e-05	0.00164602
cg15032142	0.0542404	0.273426	2.33371	1.84443e-05	0.00175837
cg15034345	0.0489133	0.325456	2.73416	1.45953e-05	0.00168821
cg15042811	0.0449238	0.247084	2.45945	0.000313227	0.00581883
cg15045802	0.250635	0.0603691	-2.05371	0.00210606	0.0185856
cg15048660	0.0450123	0.246698	2.45435	0.00460792	0.0310608
cg15048991	0.0457329	0.324947	2.8289	7.93156e-06	0.00164533
cg15049968	0.032901	0.17234	2.38905	3.49074e-06	0.00164533
cg15051226	0.0376438	0.219206	2.5418	1.21444e-05	0.00166211
cg15057061	0.0326963	0.211857	2.69589	0.00420975	0.0292737
cg15063116	0.0569149	0.232186	2.0284	6.00652e-05	0.00254155
cg15070848	0.0301177	0.172721	2.51976	0.00145177	0.0147109
cg15082028	0.0366239	0.162433	2.14899	0.00107377	0.0122041
cg15087347	0.0437252	0.181607	2.05428	0.000234248	0.00492802
cg15104644	0.0630723	0.26433	2.06726	0.000162635	0.0040555
cg15126544	0.0390925	0.262605	2.74793	1.5378e-05	0.00170212
cg15129608	0.0406397	0.187567	2.20645	8.02939e-05	0.00288067
cg15146859	0.0310146	0.236577	2.93129	2.26615e-05	0.00182449
cg15173134	0.0738614	0.373987	2.3401	0.000123049	0.00352945
cg15190738	0.0198553	0.120581	2.60241	7.65261e-05	0.00281772
cg15202738	0.0173026	0.256501	3.8899	2.09825e-05	0.00179687
cg15207742	0.0702657	0.284428	2.01717	0.000320236	0.00588773
cg15208375	0.061748	0.273244	2.14573	0.000151744	0.00391462
cg15209566	0.0222981	0.0896586	2.00752	0.0019492	0.0176915
cg15212349	0.0290174	0.132054	2.18614	2.70901e-05	0.00191704
cg15230781	0.0714452	0.303335	2.086	1.75135e-05	0.00173744
cg15232894	0.0219171	0.112849	2.36426	0.00173395	0.0164624
cg15241920	0.0374516	0.218782	2.5464	0.000151745	0.00391462
cg15244223	0.0450681	0.185056	2.03778	0.00173395	0.0164624
cg15245095	0.0288224	0.221524	2.9422	6.0524e-06	0.00164533
cg15248835	0.0259337	0.200883	2.95346	1.42183e-05	0.00167499
cg15249639	0.0512923	0.225617	2.13706	0.00350561	0.0259811
cg15262242	0.0377052	0.256259	2.76477	1.31424e-05	0.00166402
cg15264083	0.0156621	0.0705012	2.17037	0.00570618	0.0358027
cg15264806	0.0288617	0.182171	2.65807	1.03612e-05	0.00164602
cg15267010	0.0179004	0.14678	3.03559	0.0011645	0.0128406
cg15278646	0.0195242	0.17707	3.18099	4.81708e-05	0.00231926
cg15295597	0.0180086	0.189212	3.39324	4.99923e-06	0.00164533
cg15299832	0.0206013	0.173361	3.07297	4.93728e-05	0.0023408
cg15313459	0.0417318	0.270198	2.6948	0.000104353	0.00325042
cg15337897	0.0310844	0.191447	2.62268	0.000528181	0.00790044
cg15344220	0.0218264	0.13146	2.59048	0.000365471	0.00636044
cg15356923	0.0419719	0.16851	2.00533	1.19852e-05	0.00166211
cg15376615	0.0319173	0.16968	2.4104	1.75135e-05	0.00173744
cg15386964	0.0299962	0.26252	3.12958	0.000186658	0.00434874
cg15400238	0.0373723	0.163213	2.12672	0.000114679	0.00340394
cg15406683	0.0196629	0.230701	3.55247	4.47291e-05	0.00225178
cg15409013	0.0445756	0.268302	2.58954	3.48648e-05	0.00207707
cg15427906	0.0438597	0.246719	2.4919	0.000170299	0.0041522
cg15428578	0.0372295	0.206497	2.4716	0.000306361	0.00575148
cg15449323	0.0410423	0.179721	2.13058	0.000398872	0.00669086
cg15457745	0.0442868	0.178076	2.00755	0.000506024	0.00769232
cg15467646	0.0198761	0.152925	2.94372	6.15465e-05	0.00256887
cg15472784	0.0201123	0.110351	2.45595	0.0010309	0.0118892
cg15476528	0.0162454	0.18478	3.50771	1.99298e-05	0.00177975
cg15479068	0.0294467	0.161997	2.45979	9.71912e-05	0.0031463
cg15509687	0.0431406	0.230432	2.41722	6.00652e-05	0.00254155
cg15511738	0.0306289	0.126467	2.04579	0.000444641	0.00713033
cg15533075	0.0251587	0.117334	2.2215	2.29101e-06	0.00164533
cg15543173	0.0171312	0.0963679	2.49192	0.000416626	0.00687016
cg15543281	0.32664	0.0761875	-2.10008	0.00170026	0.0162543
cg15547669	0.0263671	0.226166	3.10057	1.42183e-05	0.00167499
cg15554678	0.0620363	0.260325	2.06913	4.93728e-05	0.0023408
cg15556502	0.0480137	0.334356	2.79987	8.36911e-06	0.00164533
cg15558982	0.0225889	0.160551	2.82935	0.000551238	0.00809693
cg15562912	0.0233467	0.181039	2.95501	2.44676e-05	0.00185539
cg15565065	0.0212251	0.290901	3.77668	2.99782e-05	0.00197679
cg15573040	0.0192131	0.127342	2.72854	0.00071048	0.00944519
cg15576900	0.0171525	0.156651	3.19106	0.000695732	0.00932002
cg15584445	0.0307991	0.173037	2.49012	8.14753e-06	0.00164533
cg15607538	0.0623783	0.336808	2.43281	3.31575e-05	0.00203812
cg15611413	0.0590452	0.26947	2.19023	0.000182435	0.00430247
cg15617814	0.109044	0.467219	2.09919	1.49817e-05	0.00169421
cg15630907	0.0301481	0.193307	2.68075	0.000158926	0.0040121
cg15637465	0.029462	0.223062	2.92052	0.000506024	0.00769232
cg15654121	0.033828	0.177651	2.39275	0.000144869	0.00383201
cg15658487	0.0300511	0.129111	2.10312	0.0035056	0.0259811
cg15672437	0.0626854	0.367176	2.55027	7.12118e-06	0.00164533
cg15674193	0.0409534	0.1856	2.18014	0.00055124	0.00809693
cg15679813	0.0702589	0.330406	2.23348	0.000162635	0.0040555
cg15680755	0.0549932	0.246468	2.16407	6.78246e-05	0.00266792
cg15681537	0.0263217	0.169446	2.6865	3.21062e-06	0.00164533
cg15684724	0.0627434	0.269372	2.10207	0.00280294	0.022386
cg15698066	0.0368525	0.170914	2.21344	0.000106849	0.00328831
cg15699267	0.0200556	0.203418	3.34238	1.62005e-05	0.00172604
cg15708153	0.0386857	0.315392	3.02727	4.36347e-05	0.00222565
cg15716405	0.0138686	0.0892348	2.68578	1.12189e-05	0.00164602
cg15736169	0.0629519	0.259839	2.0453	3.23339e-05	0.00202142
cg15745385	0.0223821	0.173967	2.9584	0.00460792	0.0310608
cg15745900	0.0535869	0.269463	2.33013	0.000239587	0.004981
cg15759056	0.0287009	0.1348	2.23165	0.00622969	0.0379439
cg15760257	0.0210787	0.293329	3.79866	0.000162635	0.0040555
cg15765724	0.0260077	0.183683	2.82021	9.49088e-05	0.00310747
cg15769764	0.0345906	0.177643	2.36053	1.06399e-05	0.00164602
cg15778012	0.0128903	0.103857	3.01024	0.000239587	0.004981
cg15778437	0.0438371	0.193388	2.14127	0.00280294	0.022386
cg15790037	0.0379032	0.179947	2.24718	0.00107377	0.0122041
cg15790820	0.0674963	0.344821	2.35297	3.23339e-05	0.00202142
cg15808943	0.0551253	0.342186	2.634	3.30151e-06	0.00164533
cg15811515	0.13952	0.574055	2.04071	3.30148e-06	0.00164533
cg15812348	0.0465452	0.187436	2.00969	3.31575e-05	0.00203812
cg15825731	0.0264085	0.184094	2.80137	1.24687e-05	0.00166288
cg15825786	0.0266812	0.114067	2.09599	0.00645092	0.038859
cg15836635	0.0393739	0.287196	2.86672	0.000125964	0.00357909
cg15839448	0.0634004	0.285621	2.17154	3.57494e-05	0.00208716
cg15847198	0.0157895	0.124118	2.97467	4.15215e-05	0.00219458
cg15867939	0.0257049	0.191055	2.89387	0.000166426	0.00410601
cg15885337	0.0745433	0.338288	2.1821	3.23339e-05	0.00202142
cg15890143	0.0348762	0.169704	2.28271	0.00111829	0.0125321
cg15890274	0.0232421	0.116029	2.31967	0.00121247	0.0131506
cg15891422	0.0139085	0.152101	3.45099	0.000334697	0.00604199
cg15917116	0.0147973	0.065008	2.13528	0.000223902	0.00480639
cg15927720	0.0243215	0.281911	3.53494	0.000190972	0.00440102
cg15928093	0.0641233	0.286939	2.16183	0.000106849	0.00328831
cg15963563	0.0275105	0.11107	2.01342	0.00405942	0.0285681
cg15967847	0.0215418	0.187116	3.11872	6.56601e-06	0.00164533
cg15972331	0.0277001	0.168241	2.60257	8.14753e-06	0.00164533
cg15975865	0.0546323	0.360176	2.72088	4.47871e-06	0.00164533
cg15987088	0.0259723	0.155513	2.58199	6.78168e-07	0.00164533
cg15993383	0.0365988	0.204587	2.48284	0.0020658	0.0183478
cg15994026	0.0442534	0.235071	2.40924	0.00160282	0.0156743
cg15996043	0.0280769	0.18452	2.71632	0.0019492	0.0176915
cg16002355	0.0466583	0.299761	2.68361	2.44678e-05	0.00185539
cg16007456	0.0535175	0.326559	2.60926	6.78242e-05	0.00266792
cg16021909	0.0620979	0.40872	2.71849	2.87049e-06	0.00164533
cg16025094	0.0237321	0.127183	2.42199	0.00101007	0.011735
cg16048517	0.032127	0.137159	2.09399	0.00384305	0.0275516
cg16049364	0.0267997	0.111696	2.05929	0.00040766	0.00677584
cg16055026	0.0612113	0.245625	2.00459	3.95055e-05	0.00215417
cg16086620	0.0886434	0.404672	2.19067	2.3249e-05	0.00183911
cg16099210	0.0395637	0.197152	2.31706	0.00691472	0.0407169
cg16099707	0.0277035	0.165542	2.57906	0.00612165	0.0375168
cg16150752	0.0530239	0.306641	2.53184	1.31424e-05	0.00166402
cg16166796	0.04161	0.32708	2.97464	9.06894e-06	0.00164533
cg16172814	0.0427979	0.259537	2.60033	9.3144e-06	0.00164602
cg16190732	0.0748506	0.402525	2.427	4.15215e-05	0.00219458
cg16206460	0.0507759	0.363576	2.84004	1.21444e-05	0.00166211
cg16222762	0.0290213	0.140084	2.2711	0.00026804	0.00531242
cg16232979	0.0147899	0.191969	3.69819	0.00134049	0.0139944
cg16234557	0.0640437	0.29304	2.19397	7.47055e-05	0.00278855
cg16246961	0.0128579	0.090232	2.81098	0.00344145	0.025668
cg16268160	0.0126027	0.0717162	2.50857	0.000979542	0.0115518
cg16277479	0.032244	0.243986	2.91969	8.14753e-06	0.00164533
cg16295725	0.0628767	0.377741	2.5868	2.15286e-05	0.00180458
cg16304215	0.0489617	0.253948	2.37481	2.3249e-05	0.00183911
cg16304950	0.0269372	0.174254	2.69351	5.18625e-05	0.00239134
cg16307705	0.0367633	0.155486	2.08045	8.02939e-05	0.00288067
cg16326674	0.0356361	0.264755	2.89324	5.06031e-05	0.00236462
cg16334314	0.0522516	0.273716	2.38913	3.07447e-05	0.00199299
cg16341592	0.030488	0.134605	2.14242	0.000969569	0.011438
cg16348470	0.0746513	0.344465	2.20612	5.28068e-06	0.00164533
cg16354296	0.00856982	0.0749718	3.12901	0.00667907	0.0397811
cg16356837	0.0242762	0.15411	2.66634	9.71912e-05	0.0031463
cg16357388	0.0580912	0.286487	2.30208	1.24688e-05	0.00166288
cg16364121	0.0537017	0.316127	2.55746	3.8533e-05	0.00213665
cg16376000	0.0472515	0.286057	2.59787	0.000158926	0.0040121
cg16393726	0.0153066	0.0762774	2.3171	0.00240867	0.020283
cg16403344	0.0642002	0.293067	2.19058	0.000151745	0.00391462
cg16404865	0.0363575	0.146351	2.00911	0.00058759	0.00842672
cg16405019	0.0472226	0.230613	2.28792	3.39486e-06	0.00164533
cg16405026	0.0559706	0.340463	2.60476	4.86393e-06	0.00164533
cg16409261	0.0662493	0.306062	2.20784	8.59644e-06	0.00164533
cg16418810	0.0715876	0.294774	2.04183	0.000788675	0.0100688
cg16419629	0.0193448	0.131757	2.76786	0.00128785	0.0136556
cg16422098	0.0638306	0.305156	2.25722	3.57494e-05	0.00208716
cg16423505	0.0331898	0.196887	2.56856	0.00146625	0.0148538
cg16424920	0.0559326	0.233826	2.06367	0.000213987	0.00468377
cg16426537	0.0605622	0.322578	2.41316	6.5402e-05	0.00264452
cg16433156	0.0478696	0.202267	2.07908	4.60378e-06	0.00164533
cg16435571	0.0442424	0.240125	2.44028	1.66273e-05	0.00173554
cg16443424	0.0193854	0.0776007	2.0011	0.00180314	0.0168599
cg16443866	0.0204083	0.266505	3.70694	0.00014487	0.00383201
cg16457786	0.0268885	0.243562	3.17923	3.90088e-06	0.00164533
cg16491617	0.060615	0.247795	2.0314	0.000563118	0.00820178
cg16492707	0.0170974	0.072275	2.07972	7.11865e-05	0.00272726
cg16519587	0.0550284	0.304499	2.46819	4.36347e-05	0.00222565
cg16520288	0.0302757	0.144601	2.25584	0.000123049	0.00352945
cg16521917	0.0543422	0.306818	2.49724	1.15198e-05	0.00165488
cg16528511	0.0297088	0.177699	2.58048	0.000162635	0.0040555
cg16531585	0.0292546	0.12446	2.08895	0.0015715	0.0154774
cg16566400	0.0464095	0.258924	2.48004	0.000539596	0.00799203
cg16571983	0.0345936	0.243201	2.81357	2.35675e-06	0.00164533
cg16573328	0.0205337	0.119746	2.54391	3.07447e-05	0.00199299
cg16573782	0.0537008	0.2179	2.02065	0.000484736	0.00750689
cg16576620	0.0165005	0.138619	3.07055	0.000256298	0.0051732
cg16580499	0.0518627	0.292657	2.49644	6.0524e-06	0.00164533
cg16611005	0.0321027	0.191319	2.57521	0.000454364	0.00722334
cg16616521	0.0338048	0.255219	2.91643	1.0543e-06	0.00164533
cg16619395	0.0222961	0.1067	2.25869	0.00121246	0.0131506
cg16620382	0.0618949	0.312126	2.33424	0.00123713	0.0133199
cg16622495	0.0141449	0.161475	3.51296	0.000373567	0.00644435
cg16624692	0.00790898	0.119264	3.91453	3.66551e-05	0.00209878
cg16626884	0.0399473	0.170106	2.09026	1.1219e-05	0.00164602
cg16629702	0.0487312	0.205488	2.07614	0.000306361	0.00575148
cg16630482	0.0705103	0.390011	2.46761	5.57736e-06	0.00164533
cg16633901	0.0374591	0.221294	2.56258	0.000949885	0.0112886
cg16635314	0.0501719	0.252051	2.32877	2.50997e-05	0.00187279
cg16640855	0.0648433	0.336	2.37343	7.72108e-06	0.00164533
cg16642284	0.102033	0.471672	2.20875	5.31516e-05	0.0024117
cg16652741	0.0303079	0.227442	2.90773	0.000239587	0.004981
cg16658931	0.0349873	0.174048	2.31458	0.000653177	0.00897588
cg16678602	0.0242127	0.233001	3.2665	0.00240868	0.020283
cg16697214	0.0373753	0.294233	2.9768	3.40009e-05	0.00206018
cg16703956	0.0727069	0.377109	2.37482	1.00894e-05	0.00164602
cg16707405	0.0492466	0.268507	2.44686	2.20881e-05	0.00181872
cg16709232	0.0859926	0.37416	2.12137	6.74624e-06	0.00164533
cg16712637	0.0318856	0.16663	2.38567	4.36347e-05	0.00222565
cg16729415	0.0987218	0.504968	2.35475	9.56619e-06	0.00164602
cg16729832	0.0178359	0.12642	2.82537	0.000381831	0.00652221
cg16732616	0.0336977	0.42857	3.66881	3.79418e-06	0.00164533
cg16767801	0.0562361	0.276495	2.29768	0.000166426	0.00410601
cg16781647	0.0317719	0.201222	2.66297	0.00834843	0.0461916
cg16783279	0.0814312	0.373489	2.19741	4.60378e-06	0.00164533
cg16787600	0.0743968	0.327546	2.13839	1.57841e-05	0.00171836
cg16818414	0.0277228	0.167906	2.59851	0.00160282	0.0156743
cg16848624	0.0452925	0.217001	2.26036	0.000539596	0.00799203
cg16856286	0.0601417	0.36412	2.59798	6.56601e-06	0.00164533
cg16857858	0.0426962	0.308959	2.85523	0.000299635	0.00567787
cg16887264	0.0313892	0.271055	3.11025	6.2035e-07	0.00164533
cg16896079	0.0522767	0.255671	2.29005	0.000234248	0.00492802
cg16896847	0.0464223	0.253457	2.44885	4.05017e-05	0.00217541
cg16897114	0.053165	0.253163	2.25152	0.000114679	0.00340394
cg16918989	0.0242977	0.236608	3.28361	2.3249e-05	0.00183911
cg16921310	0.036013	0.195415	2.43996	6.15465e-05	0.00256887
cg16924337	0.058498	0.251383	2.10343	0.000893035	0.0108588
cg16924702	0.0182617	0.139172	2.92998	4.58496e-05	0.0022746
cg16929299	0.0120199	0.0965242	3.00547	0.00612159	0.0375168
cg16943529	0.0300496	0.126717	2.07619	0.00126226	0.0134905
cg16964348	0.0269409	0.325284	3.59383	7.31601e-06	0.00164533
cg16966815	0.0344241	0.170337	2.3069	6.30623e-05	0.00259378
cg16970851	0.0340376	0.160779	2.23988	0.000681269	0.00920722
cg16976370	0.0186628	0.15377	3.04253	0.000199884	0.0045048
cg16987305	0.0617846	0.345178	2.48202	3.48648e-05	0.00207707
cg16993043	0.050422	0.26806	2.41043	6.15465e-05	0.00256887
cg16994506	0.0388626	0.221972	2.51392	0.000681269	0.00920722
cg16999370	0.0271899	0.172985	2.6695	6.62006e-05	0.00264452
cg17003293	0.038294	0.245922	2.68301	0.000381831	0.00652221
cg17012202	0.0230985	0.162087	2.8109	0.000174256	0.00420789
cg17016394	0.0368372	0.347147	3.23631	1.1219e-05	0.00164602
cg17030173	0.0878751	0.371776	2.08091	7.31601e-06	0.00164533
cg17039236	0.06681	0.309395	2.21132	8.36911e-06	0.00164533
cg17045801	0.0581452	0.288809	2.31238	1.21443e-05	0.00166211
cg17054969	0.0203463	0.183137	3.17009	0.00715767	0.041675
cg17059658	0.0739763	0.427089	2.5294	1.49285e-06	0.00164533
cg17067190	0.0239215	0.112593	2.23474	0.000178302	0.00425749
cg17079833	0.0603511	0.273386	2.17949	0.000182435	0.00430247
cg17087479	0.0582424	0.318012	2.44894	0.000166426	0.00410601
cg17095728	0.0595501	0.241364	2.01904	1.21443e-05	0.00166211
cg17105834	0.0381933	0.337411	3.14312	7.93156e-06	0.00164533
cg17108748	0.0133185	0.0928781	2.8019	6.62006e-05	0.00264452
cg17171215	0.0551545	0.232751	2.07724	8.42366e-05	0.0029478
cg17202313	0.0271437	0.232063	3.09582	0.000613051	0.00864355
cg17203063	0.047903	0.244718	2.35293	1.94224e-05	0.00177166
cg17208528	0.023125	0.217994	3.23676	7.29259e-05	0.00276012
cg17214381	0.0838347	0.381222	2.18501	1.12189e-05	0.00164602
cg17218713	0.0683581	0.314533	2.20203	0.000398874	0.00669086
cg17228900	0.0223462	0.23219	3.3772	1.72333e-06	0.00164533
cg17239236	0.129216	0.524971	2.02245	2.26615e-05	0.00182449
cg17240815	0.0540948	0.221213	2.03187	8.42366e-05	0.0029478
cg17264670	0.0687228	0.320081	2.21958	0.000416626	0.00687016
cg17265829	0.0428775	0.232832	2.44099	0.00522269	0.0337481
cg17271180	0.0305007	0.147247	2.27132	0.000575234	0.00830657
cg17277892	0.0237288	0.261895	3.46428	8.59644e-06	0.00164533
cg17284804	0.061407	0.294293	2.26078	2.44676e-05	0.00185539
[truncated: 1,174 more rows]

## Sheet: Table 4
ID	HR	95% CI	p.value_cox	pValue_log_rank
cg00017437	9.9	(2.3-43)	0.0024	0.000905002
cg00046625	13	(2.7-60)	0.0012	0.000155059
cg00072839	7.3	(2.1-25)	0.0015	0.00137757
cg00091285	14	(3-67)	0.00086	0.000593355
cg00129651	5.3	(1.5-19)	0.0092	0.00479329
cg00133595	6.6	(2.5-18)	0.00018	0.000490057
cg00153110	6.4	(1.7-24)	0.0051	0.00131291
cg00159100	5.5	(1.9-16)	0.0014	0.000278845
cg00240432	5.2	(1.8-15)	0.0024	0.00020799
cg00243313	6.4	(2-20)	0.0017	0.000212167
cg00246932	4.2	(1.5-11)	0.0052	0.00130252
cg00259618	9.4	(2.5-36)	0.00099	0.00338255
cg00290506	13	(2.9-54)	0.00068	0.00100968
cg00356183	4.4	(1.5-12)	0.0058	0.00769188
cg00382463	5.3	(1.9-14)	0.001	0.0016186
cg00400832	6.7	(1.9-24)	0.0034	0.000733706
cg00421139	4.9	(1.5-15)	0.0067	0.00874416
cg00505277	11	(2.8-46)	0.00074	0.000402664
cg00516513	8	(2.4-27)	0.00072	0.00028645
cg00532157	6.2	(2.2-17)	0.00051	0.000485633
cg00532449	5.1	(1.6-16)	0.0056	0.0094336
cg00575005	6.1	(2-19)	0.0018	0.000565466
cg00582971	9.8	(2.7-36)	0.00061	0.00559085
cg00609645	62	(15-260)	2.1e-08	9.09771e-06
cg00609966	8.6	(2.1-35)	0.0024	0.00682566
cg00615473	5	(1.5-17)	0.0089	0.00674383
cg00631837	4	(1.4-12)	0.0096	0.00353792
cg00663077	11	(3.5-34)	3.8e-05	2.43734e-08
cg00674365	4.4	(1.6-12)	0.0032	0.00577242
cg00690148	7.1	(2.1-23)	0.0014	0.000269482
cg00711088	5.6	(1.8-17)	0.0024	0.000232736
cg00765783	7.4	(2.4-23)	0.00049	4.25118e-05
cg00778995	4.8	(1.7-14)	0.0034	5.08885e-06
cg00795341	4.5	(1.5-13)	0.0062	0.00557886
cg00800229	6.5	(2.4-18)	0.00027	0.00023845
cg00836482	19	(4.5-81)	5.8e-05	0.000985723
cg00851770	7.3	(2.1-26)	0.0021	0.00361584
cg00852549	7.2	(2.2-24)	0.0013	0.00361085
cg00854242	7.9	(2.2-29)	0.0015	0.00747551
cg00909646	9.5	(3.1-29)	9.2e-05	1.30382e-05
cg00926400	6.9	(1.9-25)	0.0028	0.00015423
cg00963169	11	(3.2-40)	0.0002	1.23679e-05
cg00984146	5.8	(2.1-16)	0.00068	0.000402875
cg00986824	14	(3.1-68)	0.00072	2.32976e-05
cg01052879	6	(1.8-20)	0.004	0.00894619
cg01054478	17	(3.3-91)	0.00074	0.000257098
cg01070209	8.2	(2.4-27)	0.00064	0.000147797
cg01157070	4.2	(1.5-12)	0.0072	1.56403e-05
cg01200640	9.6	(2.5-37)	0.0011	0.000250509
cg01277542	5.3	(1.7-16)	0.0033	0.00290354
cg01278387	6.7	(1.8-25)	0.0048	0.000820687
cg01283246	15	(3.8-61)	0.00013	0.00357387
cg01307939	14	(3-65)	0.00077	0.00091106
cg01333350	10	(2.6-42)	0.001	8.26433e-05
cg01350077	7.1	(2-25)	0.002	0.00374163
cg01392544	9.8	(2.9-34)	0.00026	0.00021876
cg01405040	5.3	(1.7-17)	0.0047	0.00118102
cg01410878	5.4	(1.5-19)	0.0089	0.00327195
cg01419567	5.2	(1.8-15)	0.0018	4.29106e-05
cg01423964	14	(3.2-66)	0.00053	0.000348268
cg01436128	6	(1.7-21)	0.0056	0.00146387
cg01447112	11	(2.8-43)	0.00056	0.000156441
cg01452847	8.7	(2.4-32)	0.0011	0.000174329
cg01454487	38	(5.3-260)	0.00027	0.00212908
cg01464835	17	(3.4-85)	0.00059	0.00125016
cg01508023	6.6	(1.7-25)	0.0058	0.002241
cg01519877	5.5	(1.9-16)	0.0021	0.00604602
cg01522456	4.9	(1.6-16)	0.0068	0.000405242
cg01532168	17	(3.8-71)	0.00016	1.54077e-05
cg01546568	6.2	(1.8-21)	0.0036	0.00134854
cg01563031	7.7	(2.1-28)	0.0019	0.00445374
cg01588748	5.5	(1.6-19)	0.007	0.00103542
cg01593190	6.9	(1.9-24)	0.0027	9.57737e-05
cg01601746	13	(3.7-48)	7.7e-05	0.00019515
cg01614020	17	(4.2-69)	6.8e-05	0.000183882
cg01638213	13	(3.5-49)	0.00013	0.000250576
cg01645753	16	(3.5-74)	0.00033	0.000380119
cg01670677	6.3	(2-20)	0.0017	0.00253589
cg01672943	6.9	(2.3-21)	0.00058	0.00140465
cg01705052	7.9	(2.7-23)	0.00015	5.6008e-06
cg01729827	10	(2.9-36)	0.00031	0.00300374
cg01743841	7.9	(2.5-24)	0.00034	1.29287e-05
cg01777643	11	(2.7-46)	0.00084	0.00087294
cg01783070	17	(4.7-65)	2e-05	0.000448974
cg01802258	12	(3.2-46)	0.00023	0.000990537
cg01805540	7.8	(2.4-25)	0.00062	0.0009623
cg01808545	4.7	(1.6-14)	0.0055	0.00571394
cg01815529	3.9	(1.4-11)	0.0081	5.68369e-05
cg01815671	11	(2.7-47)	0.00082	0.00245938
cg01835308	7.8	(2.3-26)	0.00084	0.000468298
cg01870995	16	(4.4-62)	3.6e-05	0.000120395
cg01878345	5.1	(1.9-14)	0.0017	0.000995708
cg01893212	6.2	(2.2-17)	0.00043	5.38518e-05
cg01939477	6.8	(2.2-21)	0.00092	0.00623982
cg01956420	21	(4.6-99)	0.0001	0.00125846
cg01962428	5.1	(1.7-15)	0.0031	0.000152732
cg01995480	9.1	(2.4-35)	0.0011	5.0327e-05
cg02002583	8	(2.2-30)	0.0018	0.000878417
cg02012703	17	(4.3-66)	5.3e-05	0.000109825
cg02031245	5.5	(1.7-18)	0.0037	0.00599214
cg02043159	6	(2.1-18)	0.00098	0.000815859
cg02081266	6.5	(1.9-23)	0.0034	0.0012922
cg02108033	14	(3.6-52)	0.00011	1.84555e-05
cg02119363	13	(2.7-58)	0.0012	0.00807033
cg02143877	4.7	(1.8-12)	0.0014	0.000512368
cg02147695	4.3	(1.5-12)	0.0063	0.000203318
cg02172150	11	(2.9-44)	0.00054	0.00214949
cg02230017	8.6	(2.7-28)	0.00029	4.41287e-05
cg02237470	13	(3.2-52)	0.00028	0.00122988
cg02243714	5.1	(1.5-17)	0.0075	0.00920059
cg02246645	8.1	(2-34)	0.0037	0.0019872
cg02250846	11	(3-37)	0.00026	1.93043e-05
cg02253760	5.4	(2-15)	0.001	0.00452202
cg02291403	7.6	(1.8-31)	0.0049	0.00393342
cg02300154	9.7	(3-31)	0.00014	0.000216119
cg02318926	21	(4.3-110)	0.00021	5.55408e-05
cg02320740	5.5	(1.5-20)	0.0099	0.000712338
cg02332982	8.2	(2.2-30)	0.0014	0.0046752
cg02344833	11	(2.7-42)	0.00066	0.00675298
cg02370395	6.7	(2.2-20)	0.00071	0.00324866
cg02401454	6.9	(1.9-25)	0.0036	0.000133943
cg02403395	5.2	(2-14)	0.00072	0.000599719
cg02430692	5.1	(1.6-16)	0.0063	0.00589349
cg02450613	6	(2.2-17)	0.0006	7.48186e-05
cg02456226	10	(2.6-38)	0.00076	0.00470116
cg02467990	6.3	(2.2-18)	0.00077	0.000395332
cg02483484	8.1	(2.4-28)	0.0008	8.13432e-05
cg02539855	4.6	(1.7-12)	0.0024	0.00488943
cg02562431	4.7	(1.6-13)	0.0042	0.000199468
cg02574509	5.3	(1.5-18)	0.0081	0.00356549
cg02623991	6	(2.1-17)	0.00094	0.000752389
cg02650317	4.9	(1.7-14)	0.0034	0.00056197
cg02658488	9.7	(3.1-30)	8.2e-05	0.00290116
cg02705837	6.2	(1.9-21)	0.0029	0.000102324
cg02732804	5	(1.9-13)	0.001	0.00306264
cg02745211	8.4	(2.6-27)	0.00035	6.91906e-05
cg02763101	7.2	(2.4-22)	0.00049	0.000927432
cg02767771	7.8	(2.7-23)	0.00019	7.98823e-05
cg02828023	7.2	(2.4-21)	0.00038	1.1942e-05
cg02842227	23	(3.5-150)	0.001	0.000483899
cg02860732	4.4	(1.7-11)	0.0027	0.000218708
cg02899206	4.3	(1.6-12)	0.005	0.00457824
cg02910208	5.9	(1.9-18)	0.0018	0.00027061
cg02943578	9.1	(2.2-37)	0.002	0.00106208
cg02970836	6.3	(2-20)	0.0016	0.000879717
cg02978421	7.6	(2.2-26)	0.0013	3.82873e-06
cg03044249	11	(3.2-38)	0.00015	8.68365e-05
cg03059131	7.3	(2.5-22)	0.00036	9.50176e-05
cg03063639	7.7	(2.4-24)	0.0005	4.81512e-05
cg03078363	4.3	(1.4-13)	0.0089	0.00507774
cg03109827	19	(4.2-86)	0.00013	0.000178427
cg03112087	15	(3.7-64)	0.00019	0.000191523
cg03132773	5.9	(2.1-17)	0.00098	0.000100479
cg03140968	44	(7.8-250)	1.7e-05	0.00115182
cg03146949	7	(1.8-28)	0.0055	0.00219663
cg03149560	4.5	(1.5-14)	0.007	0.00729361
cg03157531	4.9	(1.6-15)	0.0055	0.0049974
cg03169018	19	(3.8-97)	0.00036	0.00184271
cg03184290	4.1	(1.4-12)	0.0097	0.00100265
cg03217795	7.3	(2.1-25)	0.0015	0.000308557
cg03224572	5.4	(1.7-17)	0.0036	0.00307277
cg03225817	5.5	(1.8-16)	0.0024	0.000915061
cg03227184	6.2	(1.9-20)	0.0025	0.00709067
cg03230154	5.6	(1.7-18)	0.0038	0.000311776
cg03234732	5.2	(1.6-17)	0.0069	0.00011694
cg03278146	5.5	(2-15)	0.00079	2.89551e-05
cg03304610	11	(3.6-33)	2.7e-05	7.28277e-07
cg03306374	17	(3.6-77)	0.0003	0.0019725
cg03315869	5.3	(1.9-15)	0.0019	0.00235364
cg03323292	5	(1.7-15)	0.003	0.00828031
cg03354113	6	(1.8-20)	0.0042	0.00455105
cg03357798	8.5	(2.4-30)	0.00088	0.000419162
cg03376794	6.6	(2-22)	0.0019	0.00180712
cg03387135	5.4	(1.6-18)	0.0063	0.000102074
cg03394150	5.2	(2.1-13)	0.00049	7.79326e-05
cg03414318	4.6	(1.8-11)	0.0013	6.12757e-05
cg03425110	9.4	(2.7-33)	0.00045	0.00346204
cg03450948	10	(2.9-37)	0.00034	0.00825764
cg03453917	4	(1.6-9.8)	0.0031	4.50769e-05
cg03502002	20	(5.6-69)	3e-06	1.33002e-07
cg03505117	5.5	(1.9-16)	0.0013	0.00106195
cg03506640	13	(3.7-46)	7.1e-05	3.25891e-07
cg03524083	10	(2.5-44)	0.0014	0.00651003
cg03530754	11	(2.8-42)	0.00052	0.000138401
cg03602280	5	(1.5-17)	0.0086	0.00387942
cg03603951	6.1	(2.1-18)	0.00097	0.00206068
cg03607359	6.6	(2-22)	0.0017	0.00325382
cg03659519	16	(4.4-59)	2.8e-05	1.44923e-05
cg03700449	16	(4-65)	0.0001	7.3327e-06
cg03703637	7.7	(2.3-26)	0.0011	0.0034937
cg03758150	22	(5-99)	4.6e-05	0.00236552
cg03779241	5.2	(1.8-15)	0.002	0.000167967
cg03813164	6.4	(2-21)	0.0019	0.000585973
cg03911502	12	(3.4-40)	9.3e-05	0.000859434
cg03970319	5.2	(1.8-15)	0.0021	0.00365654
cg03976877	5.8	(2.1-16)	0.00085	0.000544729
cg04021697	8.3	(2.7-25)	0.00019	0.000162644
cg04028634	8.9	(1.7-46)	0.0086	0.000441517
cg04035209	9.7	(2.7-35)	0.00044	0.000990034
cg04077662	28	(5.1-150)	0.00011	0.000538891
cg04136610	6.5	(2.1-20)	0.001	0.000832026
cg04138185	15	(4.2-57)	4.2e-05	0.000194483
cg04184232	6.2	(2-19)	0.0015	0.000165203
cg04184836	8.4	(2.3-31)	0.0012	0.000815437
cg04188273	8.5	(2.4-31)	0.0011	0.000404154
cg04198308	11	(3.1-40)	0.00019	7.51886e-06
cg04205107	5.8	(1.6-22)	0.0091	0.000138521
cg04245645	9.4	(2.3-39)	0.0019	0.000330836
cg04293733	8	(2.5-26)	0.00054	9.51371e-05
cg04330449	16	(3.8-70)	0.00018	0.000823085
cg04342092	6.4	(1.7-24)	0.006	0.00125961
cg04342955	4.6	(1.8-11)	0.0011	1.37451e-05
cg04347874	7.6	(2.4-24)	0.0005	0.000586987
cg04422562	8.2	(2.1-33)	0.0029	0.00760866
cg04434339	18	(4.9-63)	1.1e-05	4.44262e-05
cg04454951	5.4	(1.8-17)	0.0033	9.29588e-05
cg04475027	7.7	(2.5-24)	0.00048	1.90412e-05
cg04508482	4.9	(1.8-13)	0.0019	0.00105222
cg04510512	9.7	(2.6-36)	0.00067	0.000162833
cg04515996	4	(1.6-10)	0.0029	3.46554e-05
cg04534765	16	(4.2-62)	5.2e-05	4.6315e-05
cg04543008	7.5	(2.1-27)	0.002	0.000208761
cg04549333	4.7	(1.6-14)	0.0055	0.00174089
cg04568492	3.9	(1.5-10)	0.0067	1.95279e-05
cg04575395	6.7	(2.2-20)	0.00092	0.000634684
cg04612444	8.1	(2.3-28)	0.00093	0.000103639
cg04627496	6.8	(1.9-24)	0.0032	3.6198e-05
cg04658772	9.9	(2.8-34)	0.00031	8.85714e-06
cg04669574	23	(5.8-89)	7.4e-06	9.20995e-05
cg04685534	5.8	(1.8-19)	0.0034	0.00292896
cg04704053	11	(2.3-54)	0.0028	0.000611885
cg04747226	4.9	(1.7-14)	0.0036	0.000434206
cg04764012	23	(3.4-160)	0.0014	0.000805108
cg04784475	15	(3.3-72)	0.00049	6.22165e-05
cg04842426	13	(3.4-50)	0.00016	2.21985e-06
cg04846243	6.1	(1.9-20)	0.0029	9.8745e-05
cg04888241	14	(2.7-77)	0.0018	0.00798378
cg04904331	5.7	(2.1-16)	0.00083	0.000116878
cg04920358	5.4	(1.7-17)	0.0047	0.00900373
cg04937080	6.4	(1.7-23)	0.0051	0.000882028
cg04945331	6.6	(2.2-20)	0.0009	0.000894315
cg04992127	18	(5-67)	1.1e-05	1.61068e-05
cg05001964	9.6	(2.6-36)	0.00083	0.00267744
cg05020604	4.9	(1.7-14)	0.0028	0.00185923
cg05052324	3.9	(1.4-11)	0.0085	0.0011268
cg05063138	13	(3.2-56)	0.0004	0.00667183
cg05089090	3.5	(1.4-8.8)	0.009	0.000451945
cg05091519	14	(2.3-82)	0.004	0.0057278
cg05099508	6.4	(1.8-22)	0.0039	0.00420486
cg05134015	7.5	(2-29)	0.0032	0.00189586
cg05143887	5.8	(1.7-20)	0.0053	0.00109653
cg05151154	5.1	(1.8-14)	0.0018	0.00542508
cg05157140	5.3	(2.1-14)	0.00058	0.000265884
cg05166490	6.2	(1.6-24)	0.0074	0.00358531
cg05178576	8.4	(2.1-33)	0.0022	0.000663893
cg05183931	11	(4-33)	4.7e-06	4.63695e-05
cg05196969	5.8	(2-17)	0.0013	1.51427e-06
cg05206884	10	(2.4-43)	0.0017	0.00136964
cg05214690	6	(2-18)	0.0013	0.000481482
cg05223720	7.8	(2.2-27)	0.0013	0.00806012
cg05239311	6.7	(2.3-20)	0.00061	0.00320516
cg05241461	5.3	(1.7-17)	0.0049	0.00192431
cg05250768	6.5	(2-21)	0.0015	7.6122e-05
cg05302386	3.9	(1.6-9.5)	0.0026	0.00341388
cg05309948	5.9	(1.6-21)	0.0072	0.000968422
cg05311410	8.6	(2.8-26)	0.00018	0.000189188
cg05327835	5.3	(1.9-15)	0.0013	0.000669565
cg05335955	7	(2.1-23)	0.0014	0.0029316
cg05336698	11	(3.2-35)	0.00012	0.000563006
cg05372242	5.3	(1.7-16)	0.0039	0.00209351
cg05374412	5.2	(1.6-17)	0.006	0.000491508
cg05375728	4.6	(1.5-14)	0.0073	0.00459654
cg05376374	19	(4.2-82)	0.00011	9.03398e-05
cg05384102	5.3	(1.7-17)	0.0043	0.000962482
cg05386493	4.5	(1.6-13)	0.0054	0.00312819
cg05446629	14	(3.1-59)	0.0005	7.40012e-06
cg05495949	6	(1.6-23)	0.0086	0.00345041
cg05523056	15	(3.6-63)	0.00019	1.21576e-05
cg05525743	7.1	(2.4-21)	0.00035	2.36211e-05
cg05527869	4	(1.6-10)	0.0034	0.00179356
cg05624214	13	(2.2-82)	0.0051	0.00631433
cg05627639	11	(2.9-42)	0.00044	0.00350749
cg05661282	8.5	(2.3-32)	0.0015	0.000144452
cg05663341	4	(1.6-10)	0.0032	0.000695462
cg05663573	15	(4.5-51)	1.1e-05	9.21212e-05
cg05686497	9.6	(2.9-33)	0.00026	0.000184796
cg05728754	7	(2.2-22)	0.00088	0.000146785
cg05743346	7.4	(2.3-24)	0.00078	0.000442423
cg05759718	3.9	(1.5-10)	0.0056	0.00838694
cg05766140	4.7	(1.6-14)	0.0062	0.000357064
cg05783139	6	(1.9-19)	0.0024	0.000118843
cg05791136	6.9	(2.3-21)	0.00066	3.69119e-05
cg05888917	5.8	(1.8-19)	0.0029	0.0010067
cg05901579	4.6	(1.7-13)	0.0028	0.000486544
cg05917460	6.2	(1.8-21)	0.0033	0.00198138
cg05984554	9	(2.4-34)	0.0011	0.00145911
cg05994094	5.3	(1.8-15)	0.0025	0.000209955
cg06008912	5.5	(1.7-17)	0.0036	0.00313232
cg06060135	4.6	(1.5-14)	0.0064	0.00453327
cg06094615	9.5	(3-30)	0.00015	8.20313e-06
cg06159486	8.8	(2-39)	0.0042	0.00265705
cg06204735	5.5	(2.2-14)	0.0002	2.07519e-05
cg06241792	4.8	(1.6-14)	0.0042	0.00664829
cg06273376	13	(3.8-48)	5.3e-05	3.06375e-05
cg06288251	5.8	(2-17)	0.0015	0.00187316
cg06304097	30	(6-150)	3.5e-05	0.00063822
cg06338562	7	(2.1-23)	0.0017	0.000549451
cg06341513	6.6	(2-21)	0.0019	0.00147768
cg06374165	6.3	(2.3-17)	0.00038	0.000359372
cg06377278	5.1	(1.6-16)	0.0059	0.0065731
cg06392169	5.6	(1.6-20)	0.0072	0.00297032
cg06401021	6.5	(2.4-18)	0.00022	0.000109104
cg06419761	11	(3.1-39)	0.00021	0.00411545
cg06445348	4.4	(1.7-11)	0.0028	0.00146492
cg06459443	5.7	(1.7-20)	0.0055	0.00495499
cg06463958	6.1	(2.4-16)	0.00019	4.63018e-05
cg06479755	11	(2.8-44)	0.00059	0.008103
cg06523022	8.8	(2.1-36)	0.0026	0.000106707
cg06543087	6.5	(1.8-24)	0.0051	8.29709e-05
cg06546806	3.6	(1.4-8.9)	0.0066	0.000766154
cg06563086	9	(1.8-46)	0.0083	0.00247876
cg06570167	6.5	(2.1-20)	0.0014	0.00770231
cg06598836	8.5	(2.5-29)	0.00066	0.00629749
cg06610849	11	(3.1-39)	0.0002	1.93614e-05
cg06616729	6.8	(1.8-25)	0.004	0.00346824
cg06652199	11	(2.9-45)	0.00055	0.00409258
cg06653699	6.1	(1.6-24)	0.009	3.26056e-05
cg06679347	5.2	(1.9-15)	0.0017	0.00676199
cg06682197	5.7	(1.5-21)	0.009	0.0043783
cg06715976	7.4	(2.3-24)	0.00078	8.56196e-06
cg06728579	3.5	(1.4-8.8)	0.0071	0.00380135
cg06740600	5.8	(2.1-16)	0.00084	0.000363678
cg06746118	4.4	(1.6-12)	0.0049	0.00690203
cg06750832	5.4	(1.6-18)	0.0072	0.000917627
cg06785999	6.2	(1.9-20)	0.0026	0.000224305
cg06818710	8.1	(2.1-32)	0.0028	0.00541584
cg06831576	12	(3-51)	0.00054	0.0017314
cg06873316	16	(3.5-71)	0.00033	0.000488059
cg06893389	7.5	(2.1-27)	0.002	0.00279198
cg06947913	15	(4.2-51)	2.3e-05	5.19541e-06
cg06952671	7	(2.4-21)	0.00043	0.000290211
cg06959053	6.9	(2.1-23)	0.0016	0.000838055
cg06971129	4.5	(1.5-14)	0.0079	0.00299551
cg06993118	6	(2.5-15)	7.8e-05	1.95643e-06
cg06997381	11	(3.4-35)	5.4e-05	0.000522796
cg07017374	3.9	(1.4-11)	0.0093	0.00602389
cg07033372	11	(2.1-52)	0.0041	0.00389394
cg07068756	6.6	(2-21)	0.0017	0.000154089
cg07072722	12	(2.5-62)	0.002	0.00013795
cg07080358	7.2	(2.4-21)	0.00035	1.94467e-05
cg07113642	10	(2.7-38)	0.00052	0.00123823
cg07122245	6.1	(2-19)	0.0013	0.000520852
cg07143532	4.8	(1.7-14)	0.0031	4.81791e-05
cg07180307	9.7	(2.8-33)	0.00031	0.00557208
cg07193766	4.8	(1.7-13)	0.0032	0.00293338
cg07213060	9.4	(2.3-37)	0.0015	0.00363298
cg07230107	24	(4-140)	0.00048	3.35491e-05
cg07252731	12	(3.2-47)	0.00024	0.000158523
cg07302069	4.4	(1.7-11)	0.0017	0.000218672
cg07438617	18	(5-62)	8.6e-06	4.89138e-08
cg07502439	21	(3.7-120)	0.00063	2.52229e-05
cg07519816	6.2	(1.6-24)	0.0088	0.00111743
cg07519873	6.8	(1.9-24)	0.0032	0.00213487
cg07533148	7.2	(1.8-29)	0.0054	0.00999294
cg07559273	3.8	(1.4-10)	0.0076	0.00299644
cg07561017	4.3	(1.6-12)	0.0048	0.00322812
cg07573209	9.6	(3.3-28)	3.4e-05	6.04769e-06
cg07586272	11	(3.1-37)	0.0002	0.000679322
cg07589773	4.7	(1.6-14)	0.0048	0.00454672
cg07612562	5.7	(1.8-18)	0.0033	0.000643268
cg07640648	9.2	(2.3-38)	0.002	0.00593133
cg07687548	7.9	(2-31)	0.003	0.0016103
cg07700514	3.9	(1.5-9.9)	0.005	0.00284677
cg07710481	4.4	(1.6-12)	0.0043	6.82289e-05
cg07749724	7.7	(2.3-26)	0.00084	0.000519243
cg07770968	10	(2.9-37)	0.00037	7.24549e-05
cg07792478	4.6	(1.5-13)	0.0062	0.00178729
cg07821427	5.7	(2.2-15)	0.00032	3.99817e-05
cg07860213	9.9	(2.4-40)	0.0014	0.000685697
cg07882671	5.1	(1.8-14)	0.0021	0.00210393
cg07892785	3.9	(1.5-10)	0.0058	0.00702094
cg07900968	7.4	(2.5-22)	0.00034	0.00136224
cg07912789	6.5	(1.9-22)	0.0032	0.00317146
cg07926691	7.1	(2.2-23)	0.00094	5.33011e-05
cg07963234	12	(3-48)	0.00046	0.000343504
cg07972135	5.2	(1.7-16)	0.0033	0.00274914
cg08004425	5.6	(1.8-18)	0.0035	0.00299227
cg08047376	25	(5.4-120)	3.8e-05	2.16227e-06
cg08079580	6.8	(1.8-26)	0.0048	0.00527784
cg08089301	23	(4.6-120)	0.00013	4.02752e-07
cg08110542	11	(2.8-41)	0.00059	0.000851244
cg08114180	12	(3.4-42)	0.00012	0.00455303
cg08119884	21	(5.1-87)	2.7e-05	8.20787e-05
cg08146483	4.6	(1.6-14)	0.0058	0.000181998
cg08149193	5.6	(1.9-16)	0.0015	0.000621824
cg08151857	5.2	(1.7-16)	0.0033	0.00718325
cg08154348	5	(1.6-16)	0.0064	0.000831584
cg08190291	6.5	(1.9-22)	0.0026	0.000257689
cg08204280	21	(4.6-98)	8.6e-05	0.00040972
cg08217024	7.7	(2.6-23)	0.00023	5.36869e-05
cg08235864	15	(4-55)	5.8e-05	1.72015e-05
cg08236767	7.3	(2.7-20)	0.0001	1.57408e-06
cg08249988	8.4	(2.6-27)	0.0004	5.53964e-05
cg08265644	7.2	(2-26)	0.0024	7.8084e-05
cg08272731	10	(2.5-42)	0.0012	2.23956e-05
cg08279008	14	(3.9-50)	5.7e-05	2.32843e-05
cg08313939	17	(3.7-78)	0.00029	0.00317861
cg08315202	5.4	(1.5-19)	0.0089	0.00425855
cg08322102	6.7	(2.2-20)	0.00062	0.000190646
cg08341316	5.4	(1.7-17)	0.0048	0.00024891
cg08346159	5.5	(1.9-16)	0.002	0.00239368
cg08347047	19	(4-94)	0.00025	0.00490454
cg08384637	8.2	(2.7-25)	0.00021	0.00247261
cg08408994	6.5	(2.1-20)	0.00097	0.00787485
cg08430009	5.7	(1.6-20)	0.0064	0.000197519
cg08441170	4.7	(1.7-13)	0.0033	0.00162699
cg08448701	24	(5.8-100)	1.4e-05	2.19122e-05
cg08452658	5.5	(1.6-19)	0.0071	0.000888535
cg08464190	7	(2.5-20)	0.0002	8.20125e-05
cg08480826	4.9	(1.7-14)	0.0039	3.9849e-05
cg08492619	8	(2.6-24)	0.00025	0.000265699
cg08495115	5.3	(1.9-15)	0.0019	2.22217e-05
cg08516516	6.1	(1.8-20)	0.0029	0.00120471
cg08519216	7.6	(2-28)	0.0025	0.00390962
cg08526074	7.9	(2.5-25)	0.00052	0.00039993
cg08575330	5.6	(1.8-17)	0.0023	0.00442874
cg08586541	9.1	(2.3-36)	0.0017	4.34766e-05
cg08599259	7.4	(2.1-27)	0.0023	0.000765671
cg08620044	7.3	(2-27)	0.0028	0.0098199
cg08701047	7.9	(2.1-29)	0.002	0.00187505
cg08708684	7.2	(2.3-22)	0.00061	9.82742e-05
cg08729318	3.8	(1.4-11)	0.0099	0.00814794
cg08748671	14	(3.8-51)	7.2e-05	0.00181782
cg08753373	4.5	(1.6-13)	0.0048	0.000917551
cg08768852	3.6	(1.4-8.9)	0.0059	0.00618847
cg08806408	9.1	(2.6-32)	0.00053	0.000350309
cg08853659	5.2	(1.6-16)	0.0048	0.00181446
cg08857144	11	(2.7-48)	0.00087	0.00406934
cg08862890	3.6	(1.4-9.6)	0.0098	0.00125104
cg08876441	6.1	(2.1-18)	0.001	0.000456482
cg08939095	7.3	(1.9-27)	0.0032	7.24353e-05
cg08964780	9.8	(2.4-41)	0.0016	0.000293785
cg09008705	4	(1.5-11)	0.007	0.00252946
cg09009536	9.2	(2.2-38)	0.0021	0.00418084
cg09010671	5.8	(1.6-21)	0.0079	0.00288956
cg09016242	6.6	(2.1-20)	0.0012	0.000431589
cg09017619	4.6	(1.5-14)	0.0068	4.72322e-05
cg09022422	11	(2.4-51)	0.0019	0.00123182
cg09022943	12	(2.8-47)	0.0007	8.85856e-05
cg09048530	5.3	(1.7-16)	0.0041	0.000267646
cg09053680	6.8	(1.9-24)	0.0032	5.03995e-05
cg09062550	15	(4.7-49)	5e-06	0.00421863
cg09083627	5	(1.8-14)	0.0025	0.000373439
cg09118932	12	(3.1-45)	0.00034	8.47195e-05
cg09124223	47	(6.5-340)	0.00014	0.00113131
cg09125430	6.9	(2.5-19)	0.00022	0.000121412
cg09201151	5.2	(2-14)	0.00094	0.00175183
cg09236176	6.9	(2.1-23)	0.0016	0.000270684
cg09238180	4.8	(1.6-15)	0.006	0.00481986
cg09360770	4.8	(1.6-14)	0.0049	0.00517849
cg09371439	19	(2.7-140)	0.0031	3.86275e-06
cg09426834	21	(5.6-81)	6.6e-06	1.5791e-08
cg09474331	6.6	(2.3-19)	0.00038	2.30689e-05
cg09482777	32	(6.7-150)	1.4e-05	0.00515119
cg09493505	8.9	(2.7-30)	0.00037	6.74228e-05
cg09507526	7.8	(2.3-26)	0.00081	0.00414792
cg09524455	7.1	(2.4-21)	0.00048	3.07415e-05
cg09528825	6.7	(2.3-20)	0.00062	0.00101662
cg09551147	9.2	(2.1-40)	0.0028	0.00416847
cg09568464	5.2	(1.7-16)	0.0046	0.000385124
cg09614724	8.5	(2.4-30)	0.00094	0.000289896
cg09746736	7.4	(2.5-22)	0.00038	0.00382623
cg09774787	4.2	(1.5-12)	0.0075	0.000237448
cg09813525	6.1	(1.6-22)	0.0069	0.000531964
cg09835225	6.3	(2-20)	0.0019	0.0014494
cg09868336	4.2	(1.6-11)	0.0047	0.00586137
cg09874822	28	(5.5-140)	5.8e-05	1.37334e-05
cg09891129	9.8	(2.7-36)	0.00051	0.000585253
cg09894698	8.3	(1.9-36)	0.0047	0.000649088
cg09935282	4.3	(1.5-12)	0.0072	0.00441076
cg09969277	12	(2.9-47)	0.00048	0.00412792
cg09971314	5.3	(1.7-17)	0.0049	0.00144384
cg10023272	13	(2.3-78)	0.0041	2.58721e-05
cg10034890	6.8	(2.6-18)	8.9e-05	8.77389e-05
cg10036918	7.2	(2.1-25)	0.0021	0.00116795
cg10037494	4.1	(1.4-12)	0.009	0.00350655
cg10056356	8.3	(2.4-29)	0.00096	0.000178416
cg10077401	18	(4.3-78)	7.8e-05	0.000122005
cg10091994	5.2	(1.8-16)	0.003	0.000953883
cg10096177	6.9	(2-24)	0.0024	0.000786487
cg10188823	6.2	(2.1-19)	0.0011	0.000576942
cg10192047	5.9	(2-18)	0.0016	0.0060944
cg10196720	6.1	(2.1-17)	0.00072	1.97578e-05
cg10224098	6.4	(1.9-22)	0.0027	0.00936482
cg10237419	7.5	(2.2-25)	0.0011	1.43585e-06
cg10250663	6.7	(1.9-24)	0.0032	0.00166119
cg10293925	6.1	(2-19)	0.0015	0.000103338
cg10303487	10	(2.4-43)	0.0015	0.00030042
cg10311806	6.3	(2-21)	0.0021	0.00913257
cg10333808	11	(3.1-36)	0.00015	9.59689e-05
cg10356613	3.8	(1.4-10)	0.0091	0.00442758
cg10358533	9.3	(2.5-34)	0.00078	0.00161587
cg10362542	5	(1.9-13)	0.0013	6.73351e-05
cg10386483	8.7	(2.3-33)	0.0014	0.0060644
cg10396546	4.9	(1.8-13)	0.0019	0.000168399
cg10410142	9.9	(3.4-29)	2.6e-05	3.82611e-05
cg10435816	4.3	(1.5-13)	0.0077	6.90903e-05
cg10448808	4.4	(1.5-12)	0.006	0.00438849
cg10454514	7.9	(2.1-30)	0.0024	0.0024803
cg10471437	6.5	(2.5-17)	0.00014	0.00247775
cg10512875	6.3	(2.1-20)	0.0013	0.00101941
cg10527010	15	(2.9-74)	0.0012	1.7045e-05
cg10541517	8.3	(2.3-30)	0.0012	1.42217e-05
cg10566121	6.3	(2.7-15)	3.1e-05	1.4905e-06
cg10606059	21	(3.4-130)	0.0011	0.00222638
cg10617909	9.6	(2.7-34)	0.00043	0.00272183
cg10636403	5.4	(1.8-17)	0.0032	0.000948178
cg10658542	5.8	(2-17)	0.001	0.000206377
cg10662314	4.7	(1.8-12)	0.0018	0.00117294
cg10671668	13	(3-55)	0.00054	0.00012911
cg10731700	8.7	(2.8-27)	0.00016	0.000134708
cg10739556	25	(6.9-94)	1.3e-06	7.03887e-05
cg10770742	7.8	(2.4-25)	0.0006	7.21615e-05
cg10778841	13	(2.8-61)	0.001	0.00222631
cg10784386	6.4	(2.1-19)	0.00093	0.000116738
cg10800833	6	(2.1-17)	0.00082	0.000310186
cg10863741	5.9	(1.7-20)	0.0044	0.00667098
cg10864319	5.8	(2-17)	0.001	0.000581363
cg10922935	6	(2-18)	0.0014	0.00023891
cg10979880	7.7	(2.5-24)	0.00045	0.00409329
cg10980774	7.9	(2.6-24)	0.00028	0.00123963
cg11002404	7.9	(1.8-34)	0.0054	0.000177402
cg11014373	4.6	(1.7-12)	0.0022	0.000663732
cg11021744	5.3	(1.5-19)	0.0085	0.000876228
cg11036833	11	(2.7-46)	0.00083	0.000397536
cg11074814	4.7	(1.5-15)	0.0092	0.00803723
cg11167100	5.9	(1.7-20)	0.0048	0.000470006
cg11224582	6.7	(2.3-19)	0.00042	0.00430753
cg11281641	7.3	(2.7-20)	8e-05	0.000710422
cg11334771	7.7	(2.1-29)	0.0023	0.00413341
cg11338643	4.5	(1.6-13)	0.0051	0.000325911
cg11342468	8.2	(2.5-27)	0.0005	0.000830701
cg11381539	9	(2.3-35)	0.0014	9.51848e-06
cg11389172	8.8	(2.3-33)	0.0014	0.00152816
cg11414560	5.2	(1.8-15)	0.0018	0.00241985
cg11416243	6.6	(1.8-24)	0.0037	0.00065009
cg11430157	5.3	(1.8-15)	0.0019	0.00107012
cg11472279	4.3	(1.7-11)	0.0027	0.000332558
cg11501438	7	(1.7-29)	0.0069	0.000805006
cg11518846	5.3	(1.6-18)	0.0078	0.00165782
cg11573679	5.2	(1.9-14)	0.0011	0.000120779
cg11592503	10	(2.9-38)	0.00039	0.000121978
cg11595545	8.3	(2.4-29)	0.00079	0.000292664
cg11601252	11	(3.1-40)	0.00023	0.000648725
cg11610754	11	(3.6-34)	2.2e-05	0.000328139
cg11721803	6.9	(2.4-20)	0.00038	0.00150329
cg11723848	8.6	(2.4-31)	0.001	0.00126257
cg11835068	12	(2.5-53)	0.0017	0.00155379
cg11842610	5.6	(2-16)	0.0014	0.00020813
cg11854491	8.8	(2.6-30)	0.00044	9.00789e-05
cg11964564	3.9	(1.5-10)	0.0062	0.00656186
cg11979589	8.3	(2.7-26)	0.00026	1.27244e-05
cg11985360	6.4	(2-20)	0.002	0.00322574
cg12040830	16	(4.3-59)	3.7e-05	5.88715e-05
cg12060744	6	(2.1-17)	0.0011	0.002758
cg12072560	9.5	(2.6-34)	0.00062	0.00157283
cg12072964	4.6	(1.4-14)	0.0095	0.00131831
cg12075445	7	(2.2-23)	0.00099	0.00157864
cg12078605	13	(3.4-48)	0.00016	0.00577041
cg12079322	4.1	(1.5-11)	0.0049	0.0013979
cg12127472	8.2	(2.2-31)	0.0021	0.00179258
cg12162138	5.5	(2-16)	0.0012	0.00212379
cg12219082	5.8	(1.8-19)	0.0035	0.00195918
cg12235144	5.8	(2.1-16)	0.00085	0.000381672
cg12243597	4.8	(1.7-14)	0.0037	0.00196036
cg12300724	4.6	(1.7-12)	0.0027	0.0026483
cg12356890	4.6	(1.8-12)	0.0016	6.52688e-05
cg12374721	4.4	(1.6-12)	0.0043	0.00281887
cg12382902	6.5	(2-21)	0.0022	0.000280007
cg12395205	6.6	(2-22)	0.0023	0.0018385
cg12412079	5.5	(1.8-16)	0.0022	4.03211e-05
cg12417685	5	(1.5-16)	0.0076	0.008091
cg12453014	5.9	(1.8-19)	0.0028	0.00507533
cg12456799	7	(2.2-22)	0.00099	0.00170699
cg12477716	9.7	(3-32)	0.00017	1.66852e-05
cg12483476	18	(4-82)	0.00016	0.000142741
cg12511214	7	(2.1-23)	0.0015	0.00150403
cg12610207	7.9	(2.3-27)	0.0011	0.00279042
cg12614213	9.5	(2.7-33)	0.00043	0.000695217
cg12652174	5.4	(2-15)	0.001	0.000167818
cg12662072	4.5	(1.7-12)	0.0028	0.00219307
cg12668482	20	(5-82)	2.7e-05	6.85532e-06
cg12700904	8.6	(2.2-33)	0.0019	0.00052664
cg12746059	5	(1.7-15)	0.003	0.000398454
cg12768681	16	(3.9-68)	0.00014	0.00125251
cg12781700	6.7	(2-23)	0.0025	0.00168832
cg12799689	7.3	(2.5-22)	0.0003	0.00136614
cg12810096	7.1	(1.6-31)	0.009	0.000454689
cg12825070	4.4	(1.6-12)	0.0032	0.00636415
cg12836011	8.9	(2.8-28)	0.00019	3.64905e-05
cg12869912	5.1	(1.6-16)	0.0047	0.00721578
cg12877251	3.9	(1.5-10)	0.0062	0.00723207
cg12892506	5.5	(1.9-16)	0.002	8.15581e-05
cg12907379	4.7	(1.6-14)	0.0052	0.00158113
cg12908522	7.4	(1.6-34)	0.0099	0.00277297
cg12918457	13	(2.8-58)	0.00092	0.000182071
cg12919520	4.8	(1.6-15)	0.0062	9.54921e-05
cg12926104	4.5	(1.6-13)	0.0049	0.00028755
cg12940822	15	(4.3-51)	2.2e-05	6.72431e-06
cg12973591	6.5	(2.2-19)	0.00067	4.39505e-05
cg12995800	6.6	(2-22)	0.0022	0.00711013
cg13004587	8.5	(2.9-25)	8.2e-05	0.000835602
cg13019491	5.6	(1.7-19)	0.0055	0.00626178
cg13021333	4.7	(1.7-13)	0.0022	0.000270129
cg13046832	6.5	(1.9-22)	0.0025	0.00205329
cg13048512	8	(1.8-36)	0.0065	0.00196934
cg13060997	4.5	(1.5-14)	0.0073	0.0025831
cg13063344	13	(3.6-45)	8.1e-05	6.75625e-05
cg13078140	4.3	(1.5-12)	0.0057	0.00298706
cg13092806	7.2	(2.3-23)	0.00086	0.00284141
cg13139972	11	(3-44)	0.00035	0.000262453
cg13142700	6.9	(2.4-20)	0.00037	2.69503e-06
cg13196826	8.9	(2.4-33)	0.0011	0.000788291
cg13202845	7	(2.6-19)	0.00013	7.12136e-05
cg13211683	5.4	(1.9-16)	0.0021	0.00248251
cg13314145	5.1	(1.5-17)	0.0094	0.00386818
cg13324546	17	(3.4-90)	0.00066	0.0059363
cg13356896	4.8	(1.8-13)	0.0016	0.000207254
cg13371788	4.3	(1.4-13)	0.009	0.00407599
cg13404421	4.2	(1.5-11)	0.006	0.00756779
cg13407456	8.8	(2.8-28)	0.0002	0.000860531
cg13434989	4	(1.5-11)	0.0061	0.0061695
cg13445796	4.6	(1.7-13)	0.0034	0.00220405
cg13450005	4.6	(1.5-14)	0.0079	0.00104297
cg13458645	10	(2.4-45)	0.0019	0.000323034
cg13464448	9.3	(2.8-31)	0.00025	0.000653751
cg13473356	22	(4.3-120)	0.00022	0.00584373
cg13481132	4.6	(1.6-13)	0.0044	0.00333584
cg13512069	1500	(110-21000)	5.5e-08	2.91081e-08
cg13534450	4.2	(1.6-11)	0.0035	0.00289838
cg13539545	4.4	(1.5-14)	0.0086	0.00541602
cg13544006	8.1	(2.5-26)	0.00053	5.12323e-05
cg13557668	5.8	(1.7-20)	0.0055	0.00069626
cg13562911	5.6	(1.8-17)	0.0026	0.000230163
cg13565656	4.6	(1.6-13)	0.0049	0.00863872
cg13611347	6	(1.7-21)	0.0045	0.00364073
cg13652513	21	(3.4-130)	0.0011	0.00124044
cg13678973	15	(3.9-56)	8.4e-05	1.39614e-05
cg13702005	6.8	(2.3-20)	0.00064	0.000462574
cg13725782	6.1	(2.2-17)	0.00067	0.000548263
cg13755795	15	(3.2-68)	0.00054	0.00811961
cg13764991	8.4	(1.7-42)	0.0095	0.00125773
cg13794530	8.4	(2.2-33)	0.0022	0.000100408
cg13796319	7.2	(2.2-24)	0.0012	0.00638148
cg13796823	18	(3.8-87)	0.00029	0.00376364
cg13874817	7.2	(1.9-27)	0.0034	0.00580344
cg13879483	4.9	(2-12)	0.00075	4.94411e-05
cg13909534	14	(2.9-68)	0.0011	0.000316314
cg13912115	5.8	(1.6-20)	0.0064	0.00200201
cg13912117	12	(3.5-40)	7.5e-05	1.70618e-05
cg13913015	4	(1.5-10)	0.0049	0.00261487
cg13916740	5.6	(2-16)	0.0011	0.00687042
cg13919438	14	(3-68)	0.00092	0.00474512
cg13933262	9.2	(3.4-25)	1.2e-05	8.87915e-07
cg13939859	9	(2.2-36)	0.002	7.58387e-05
cg13946520	7.6	(2.3-26)	0.00095	0.000280604
cg13950603	5.8	(1.8-19)	0.0034	0.00825643
cg13962186	17	(3.8-73)	0.00021	0.000380812
cg13982529	6	(1.7-21)	0.0044	0.0014167
cg13996155	5.1	(1.6-17)	0.0073	0.000368686
cg14002960	5.1	(1.6-16)	0.0062	0.00331023
cg14007067	11	(2.7-42)	0.0008	4.04635e-05
cg14007757	39	(5.4-280)	0.00029	3.78651e-05
cg14031402	9	(1.8-45)	0.0075	0.00763942
cg14045872	10	(2.9-34)	0.00026	8.87623e-05
cg14055896	5.9	(2-17)	0.0011	0.00385944
cg14060496	12	(2.4-56)	0.0022	0.00664625
cg14093715	5.6	(1.6-20)	0.008	0.00651794
cg14123923	5.3	(1.8-15)	0.002	0.000788444
cg14129397	6.2	(1.7-23)	0.0061	0.00177594
cg14135814	9.9	(2.7-37)	0.00057	0.0008226
cg14146100	12	(3-46)	0.00039	1.41122e-06
cg14159026	6.7	(2.5-18)	0.00016	0.0001164
cg14186641	8.8	(2.7-29)	0.00032	0.000134826
cg14209299	20	(4.5-88)	8.1e-05	2.17174e-06
cg14218042	7.1	(1.8-28)	0.0055	4.53132e-05
cg14230666	9.5	(2.7-33)	0.00042	0.000125556
cg14248715	4.4	(1.5-13)	0.0063	0.00319074
cg14251622	5	(1.9-14)	0.0015	0.000167068
cg14256587	5	(1.7-15)	0.0034	9.60621e-05
cg14271531	6.5	(1.8-23)	0.0039	0.000155714
cg14287112	4.2	(1.4-12)	0.0091	0.00897316
cg14324370	5.8	(1.8-18)	0.0028	0.00708869
cg14347088	6.8	(2.1-22)	0.0016	3.30291e-05
cg14353137	26	(6.1-110)	1.1e-05	9.31565e-06
cg14373923	15	(3.4-67)	0.00036	0.00330724
cg14388858	17	(3.1-95)	0.0011	0.00122754
cg14394692	6.1	(1.8-21)	0.004	0.00236212
cg14409941	5.7	(1.7-18)	0.0038	0.00170032
cg14416371	10	(3.4-30)	3.5e-05	0.000105867
cg14441976	8.1	(2.5-26)	0.00055	0.00393002
cg14453201	4.6	(1.7-13)	0.0032	0.00208629
cg14458834	15	(4.4-49)	1.5e-05	4.2469e-07
cg14470895	5.2	(1.6-17)	0.0071	0.00136927
cg14473102	22	(3.9-120)	0.00043	0.000602849
cg14473327	9.4	(2.5-35)	0.001	0.00890614
cg14485004	6.9	(1.9-25)	0.0031	0.00457885
cg14487131	4.2	(1.6-11)	0.0037	0.0021451
cg14492800	19	(4.6-74)	3.6e-05	2.71727e-05
cg14507560	5.9	(1.9-18)	0.0019	0.00764069
cg14507868	5.5	(1.9-16)	0.002	6.53558e-05
cg14510812	4.6	(1.5-15)	0.0094	0.00365612
cg14526047	5.2	(1.8-16)	0.0028	3.43923e-06
cg14562712	6.1	(2.1-18)	0.001	0.000468482
cg14568217	5.8	(1.9-18)	0.002	0.00296113
cg14602341	9.2	(1.9-45)	0.0059	0.00920322
cg14625113	4.9	(1.6-15)	0.0062	0.00173383
cg14625175	4.8	(1.5-15)	0.0067	0.00133176
cg14648916	7.3	(2-26)	0.0025	0.00696241
cg14649650	4.6	(1.6-13)	0.0047	0.00202044
cg14654886	22	(5.1-92)	3.1e-05	0.000468606
cg14657517	9.2	(2.5-34)	0.0009	9.5744e-05
cg14658804	5.1	(1.6-16)	0.0048	0.00612663
cg14667871	6.3	(1.9-21)	0.0023	0.000415162
cg14669274	7.9	(2.3-27)	0.00092	0.000154094
cg14696396	9.1	(1.8-47)	0.0083	0.00155218
cg14743594	14	(4-52)	3.9e-05	0.00350805
cg14763548	5.8	(2.1-16)	0.00064	0.000117698
cg14768785	11	(3.7-34)	2.1e-05	0.000230707
cg14817655	7.4	(2.2-25)	0.0012	7.09536e-05
cg14872657	8.6	(2.2-33)	0.0017	0.00492528
cg14885748	7.5	(2.2-26)	0.0013	0.00103578
cg14921743	6.2	(2.3-17)	0.0003	0.000589881
cg14930075	15	(3.9-61)	9e-05	0.000241275
cg14944647	11	(3.3-37)	0.00011	7.94682e-05
cg15020425	13	(2.4-71)	0.0031	0.00476427
cg15031661	7.5	(2.7-21)	0.00012	0.000194073
cg15032142	25	(3.8-170)	0.00084	0.00066994
cg15034345	4.8	(1.8-13)	0.0022	0.000282671
cg15042811	6.9	(2.2-22)	0.0011	1.88997e-05
cg15048660	5	(1.9-13)	0.0014	0.00843227
cg15048991	5.2	(1.8-15)	0.0025	0.00810481
cg15057061	6.4	(2.1-20)	0.0014	0.000717434
cg15063116	11	(2.7-47)	0.00087	0.00340767
cg15104644	7.7	(2.4-25)	0.00071	0.00160049
cg15129608	6.9	(2.1-23)	0.0018	0.00707318
cg15146859	6.3	(2.2-18)	0.00053	0.000298055
cg15208375	5.7	(2.2-15)	0.00044	0.000917827
cg15212349	5.3	(1.6-17)	0.0053	0.00011295
cg15230781	4.9	(1.6-15)	0.0047	0.00845625
cg15241920	4	(1.4-11)	0.0088	0.00174506
cg15244223	8.4	(2.2-33)	0.0022	0.00025142
cg15249639	5.4	(1.9-15)	0.0015	0.000264648
cg15313459	6	(2.1-17)	0.001	0.00496325
cg15337897	14	(3.9-50)	5.8e-05	0.000241266
cg15376615	5.8	(2-17)	0.0013	0.00473943
cg15386964	9.9	(3.5-28)	1.6e-05	2.68217e-05
cg15409013	6.8	(1.9-25)	0.0032	0.00149185
cg15476528	5.5	(1.8-17)	0.0033	0.00905485
cg15547669	5	(1.6-16)	0.0061	0.000681762
cg15554678	32	(4.1-250)	0.00095	0.00923001
cg15556502	13	(3.9-45)	3e-05	7.0653e-07
cg15562912	7.4	(2.3-24)	0.00082	0.000338525
cg15565065	29	(6.8-120)	5.6e-06	1.08783e-07
cg15617814	12	(3.3-41)	0.00012	1.76926e-05
cg15672437	6.9	(1.9-25)	0.0029	0.000910332
cg15679813	6.6	(2.4-18)	0.00027	0.000171568
cg15708153	7.2	(2.3-22)	0.00062	0.000299002
cg15760257	4.7	(1.6-14)	0.0056	0.00145586
cg15769764	10	(2.8-38)	0.00047	0.00129695
cg15839448	9	(2.2-37)	0.0024	0.00107894
cg15867939	9.2	(2-42)	0.0042	0.00158688
cg15917116	28	(2.6-310)	0.0058	0.000749433
cg15928093	9	(2.2-37)	0.0023	0.000765391
cg15975865	6.1	(1.6-23)	0.0071	0.000145375
cg15996043	13	(3.2-50)	0.00027	0.00175574
cg16007456	8.9	(2.7-30)	0.00039	0.000105185
cg16021909	15	(3.2-68)	0.00057	0.00309552
cg16086620	16	(4.3-63)	3.9e-05	3.15902e-05
cg16166796	6.5	(2.1-20)	0.0012	0.00053866
cg16190732	12	(3.1-47)	0.0003	0.000432088
cg16206460	6.2	(2.1-18)	0.00086	0.000275433
cg16222762	6.2	(1.9-21)	0.0031	0.00868148
cg16234557	6.2	(2.2-18)	0.00063	0.00110649
cg16304215	4.7	(1.7-13)	0.0033	0.0061915
cg16307705	13	(3.3-54)	0.00031	0.000105148
cg16334314	9.6	(2.8-33)	0.00034	3.77104e-05
cg16341592	8.9	(2.2-36)	0.0024	0.00855575
cg16356837	7.5	(2.3-25)	0.00096	0.00256276
cg16357388	9.3	(2.8-32)	0.00034	9.00494e-05
cg16364121	4.3	(1.7-11)	0.0027	0.000928389
cg16376000	6.3	(2-19)	0.0014	0.00303215
cg16418810	24	(5.7-97)	1.2e-05	3.44496e-06
cg16426537	5.7	(1.6-20)	0.0066	0.00512836
cg16433156	6.7	(1.8-26)	0.0054	0.00105407
cg16435571	12	(2.8-47)	0.00062	1.04162e-06
cg16443866	6.8	(2.1-22)	0.0015	0.00987964
cg16457786	4.5	(1.5-14)	0.0081	0.005454
cg16491617	4.3	(1.7-11)	0.0021	0.00134644
cg16528511	5	(1.8-14)	0.0016	7.18175e-05
cg16571983	7.3	(1.7-32)	0.0075	0.00664999
cg16580499	7.2	(2.3-22)	0.00063	0.000725261
cg16620382	5.3	(2.4-12)	2.9e-05	0.000392158
cg16630482	5.8	(1.7-20)	0.005	0.00603831
cg16633901	6.3	(2.1-19)	0.00086	0.0084884
cg16642284	4.3	(1.8-11)	0.0013	0.00115557
cg16697214	14	(3.6-54)	0.00013	8.74316e-05
cg16703956	4.2	(1.4-12)	0.0097	0.00180071
cg16712637	15	(3.2-75)	0.00065	0.000621462
cg16729415	6.2	(1.7-23)	0.0059	0.00556927
cg16732616	30	(4.9-180)	0.00022	0.000409664
cg16767801	9.6	(2.5-37)	0.0011	0.00282496
cg16783279	5.7	(1.7-19)	0.0041	0.00847691
cg16787600	5.3	(1.7-16)	0.0031	0.000416288
cg16848624	12	(2.6-52)	0.0012	0.00022128
cg16856286	9.3	(2-42)	0.004	0.00502196
cg16857858	5.4	(2-15)	0.00088	0.000184289
cg16896079	8.4	(2.6-27)	0.00042	0.000313443
cg16897114	6.9	(2.2-22)	0.001	0.00168418
cg16921310	7.3	(2.2-24)	0.0013	0.000370774
cg16964348	4.2	(1.5-12)	0.0062	0.00212922
cg16987305	7.2	(2.4-22)	0.00051	5.6093e-05
cg16994506	6.6	(2.1-21)	0.0015	0.00179488
cg17003293	16	(4-61)	7.2e-05	0.000465763
cg17039236	8	(2.1-31)	0.0026	0.00151267
cg17059658	5.5	(1.8-17)	0.0029	0.00106798
cg17079833	4.8	(1.7-13)	0.0027	0.000173628
cg17087479	7.1	(2.2-22)	0.0009	0.00153758
cg17108748	22	(2.8-170)	0.0034	0.00406943
cg17214381	11	(3.6-32)	2.1e-05	6.77638e-06
cg17218713	7.4	(2.3-23)	0.00065	0.000101911
cg17239236	8.8	(2.9-26)	9.7e-05	6.77625e-05
cg17240815	6.3	(2-20)	0.0019	0.00197497
cg17271180	5.8	(1.5-22)	0.0092	0.00638949
cg17290701	5.8	(1.8-18)	0.0026	5.98193e-05
cg17300353	6.6	(2.2-19)	0.00061	6.20654e-05
cg17305436	7.4	(2.2-24)	0.0011	5.30484e-06
cg17307479	8	(2.2-28)	0.0013	0.00048148
cg17322443	44	(5.7-330)	0.00027	0.000181049
cg17331296	4.3	(1.5-12)	0.0053	0.00259305
cg17334018	8.4	(2.2-32)	0.0019	0.000193424
cg17342302	4.6	(1.6-14)	0.0054	0.00163247
cg17349389	11	(2.6-43)	0.001	0.000865209
cg17373442	6	(2.2-16)	0.00057	0.000303878
cg17380661	5.6	(1.7-18)	0.004	0.000110813
cg17391928	44	(7.8-250)	1.7e-05	0.000100866
cg17398252	8.9	(3-27)	8.9e-05	1.76212e-05
cg17429382	7.6	(2.1-28)	0.0022	0.000158479
cg17448335	8.2	(2.2-31)	0.002	0.0047874
cg17453780	6.2	(2.1-18)	0.00086	0.000152648
cg17460447	8.2	(2.9-23)	5.8e-05	0.000132378
cg17466857	13	(3.6-45)	8.3e-05	0.000135276
cg17495912	23	(3.6-140)	0.00089	0.00453272
cg17498773	10	(3-33)	0.00015	0.00119235
cg17504999	8.5	(2.2-33)	0.0019	0.000124175
cg17507573	6.6	(1.8-25)	0.0053	0.000990444
cg17541528	14	(3.5-57)	0.0002	0.00050667
cg17741501	7.5	(2.1-27)	0.0022	0.0016048
cg17741689	11	(2.5-51)	0.0017	0.00125643
cg17767285	6	(2-18)	0.0013	0.000475039
cg17772028	5	(1.7-14)	0.0031	0.00190574
cg17787134	9.3	(3-29)	0.00014	0.000119221
cg17803868	5	(1.6-16)	0.0058	0.00012335
cg17839237	8.4	(2.2-32)	0.0018	0.000343374
cg17896776	5.5	(1.9-16)	0.002	9.16182e-05
cg17911318	17	(4.7-60)	1.5e-05	1.13795e-05
cg17958315	9.5	(2.7-34)	0.00047	2.74838e-05
cg17971936	5	(1.7-15)	0.004	0.00631046
cg18009496	7.6	(2.2-26)	0.0014	3.90481e-05
cg18023283	3.9	(1.4-11)	0.0087	0.000286959
cg18070676	7.7	(2.6-23)	0.00023	0.000132547
cg18082337	7.6	(2.2-25)	0.0011	0.00173577
cg18115215	7.7	(2.1-28)	0.002	5.55295e-05
cg18120376	4	(1.5-11)	0.0053	0.00834492
cg18121355	5.4	(1.7-17)	0.0046	8.61106e-05
cg18130044	5.5	(2.1-15)	0.0005	0.00158956
cg18141828	13	(3.2-53)	0.00033	0.000394195
cg18147485	7.1	(2.6-20)	0.00018	0.000404495
cg18206027	17	(3.9-74)	0.00017	1.47976e-06
cg18213472	5.1	(1.6-16)	0.006	0.000620316
cg18319029	4.3	(1.5-12)	0.0066	0.00223178
cg18326021	9.4	(2.3-38)	0.0017	0.0092641
cg18328894	4.6	(1.5-14)	0.0066	0.00374026
cg18331515	13	(2.9-55)	0.00076	0.000540977
cg18348647	5.1	(1.7-15)	0.0041	0.00325806
cg18375860	8.6	(2-38)	0.004	0.000960524
cg18380175	10	(2.1-51)	0.0046	0.00748989
cg18403551	5.5	(1.7-18)	0.0037	0.000328055
cg18424634	7.6	(2.2-27)	0.0016	0.00102572
cg18485844	14	(3.6-52)	0.00014	0.000211965
cg18486102	3.1	(1.5-6.4)	0.0029	0.000111988
cg18529845	4.4	(1.5-13)	0.0075	0.00372855
cg18568990	5.4	(1.7-17)	0.0036	0.000523272
cg18578405	12	(2.9-51)	0.00063	0.00126134
cg18579862	5.8	(1.9-18)	0.002	0.00510158
cg18607529	5.6	(1.7-19)	0.0053	0.00661627
cg18627360	7.7	(2.5-24)	0.00044	0.000161125
cg18652900	8.1	(2.5-26)	0.00049	8.87106e-05
cg18680788	7.7	(2.7-22)	0.00013	0.000172835
cg18710278	6.7	(2.2-21)	0.00093	0.00103664
cg18716164	19	(4-93)	0.00022	2.40325e-05
cg18729357	6.6	(1.9-23)	0.003	4.40299e-06
cg18755296	6.3	(2-20)	0.002	0.00233968
cg18762727	5.1	(1.7-15)	0.0034	0.000130381
cg18764577	16	(3.6-70)	0.00026	2.57182e-05
cg18772588	5.1	(1.7-15)	0.0034	0.000890435
cg18777119	11	(2.9-39)	0.00035	0.000109569
cg18787401	7.4	(2.2-25)	0.0011	0.0009673
cg18789663	4.2	(1.6-11)	0.0045	0.0052197
cg18790597	11	(3.1-42)	0.00025	0.0020138
cg18840956	7.6	(2-28)	0.0028	0.00203909
cg18856581	7.2	(2.3-23)	0.00076	0.00295096
cg18884037	5.2	(1.6-17)	0.0056	0.00708701
cg18897632	7.8	(2.4-25)	0.0006	0.00159342
cg18932809	5.3	(1.7-16)	0.004	0.00349661
cg18966597	8.1	(2.8-23)	9e-05	0.000119891
cg18991611	4.3	(1.7-11)	0.0025	0.00110855
cg19001226	10	(3.2-33)	8.2e-05	0.000312937
cg19019537	4.7	(1.9-12)	0.0011	0.000684575
cg19047292	3.9	(1.4-11)	0.0098	0.00417906
cg19054524	29	(7.3-110)	1.7e-06	3.54072e-05
cg19074340	7.5	(2.5-23)	0.00034	0.000180268
cg19098763	4.9	(1.6-15)	0.0057	0.00226581
cg19099050	7.4	(2.4-23)	0.0006	1.76715e-05
cg19118812	4.8	(1.7-13)	0.0029	0.000765768
cg19126300	6	(1.5-23)	0.0095	0.00181912
cg19142026	9.3	(3.1-29)	9.1e-05	0.00277502
cg19144684	6.3	(1.7-24)	0.0063	0.000163851
cg19205994	6.3	(2-20)	0.0018	0.00277623
cg19206040	9.5	(2.2-41)	0.0024	0.000642265
cg19288904	6.3	(2-20)	0.0018	0.00121121
cg19304150	8.9	(2.3-35)	0.0017	0.00108878
cg19317413	4.9	(1.5-16)	0.0079	0.00290279
cg19418951	7	(2.4-21)	0.00043	0.00147376
cg19443257	4.3	(1.5-13)	0.0082	0.00903993
cg19456540	5.7	(1.7-19)	0.0048	0.00366163
cg19484420	11	(2.2-51)	0.0031	7.02044e-05
cg19492047	10	(3.1-34)	0.00014	3.11776e-05
cg19497031	7.2	(2.2-24)	0.0013	0.0044498
cg19564098	5.6	(2-15)	0.00076	0.00192119
cg19570244	8.5	(2.4-30)	0.00091	3.39184e-05
cg19595835	8.4	(1.8-39)	0.0063	0.00441314
cg19619405	5	(1.9-13)	0.0014	0.00159323
cg19675288	7.2	(2.7-19)	7.3e-05	7.15984e-06
cg19679633	5.9	(2.1-17)	0.001	0.000152138
cg19712965	3.7	(1.4-9.6)	0.0081	0.00730383
cg19717586	18	(4.2-76)	9.7e-05	2.94196e-05
cg19719547	8.7	(2.6-29)	0.00051	6.87707e-05
cg19721867	9.9	(2.7-36)	0.00048	3.40577e-05
cg19724555	10	(3-34)	0.00018	1.96717e-06
cg19727439	13	(2.4-68)	0.0028	0.00206929
cg19752627	4.9	(1.8-13)	0.0019	0.00628089
cg19788831	6.2	(2.1-18)	0.00074	0.00168236
cg19875547	7.9	(2.3-27)	0.0009	0.00738177
cg19898128	5.3	(1.9-15)	0.0013	6.1729e-05
cg19939997	9.9	(2.3-43)	0.0022	0.0045086
cg19944763	4.5	(1.5-13)	0.0073	0.00842368
cg20129213	7	(2.4-20)	0.00031	0.000169318
cg20174066	12	(3.3-40)	0.00011	6.4174e-05
cg20185017	5.7	(1.8-18)	0.0035	0.00131858
cg20230721	3.8	(1.5-10)	0.0067	0.00614432
cg20255775	4.9	(1.8-13)	0.0021	0.00299173
cg20279673	6.9	(1.9-26)	0.0037	0.00128326
cg20302133	10	(2.6-42)	0.001	0.000788142
cg20312205	6.2	(1.9-20)	0.0026	0.000472951
cg20334627	6.1	(2.1-18)	0.00098	0.000167923
cg20340508	5.2	(1.6-16)	0.0051	0.00277189
cg20377305	8.5	(2.2-33)	0.0021	0.000995372
cg20390515	5.7	(2-17)	0.0013	0.00136043
cg20403498	5.6	(2-15)	0.00077	0.000329056
cg20495645	12	(3.3-40)	0.00013	6.87235e-06
cg20525183	4.4	(1.5-13)	0.0063	0.00101756
cg20527270	4.8	(1.7-13)	0.0024	0.00490799
cg20539752	14	(2.4-76)	0.0032	0.00729008
cg20568196	3.8	(1.4-10)	0.0094	0.000852825
cg20585530	7.6	(1.8-32)	0.0058	0.00173202
cg20622089	5.9	(2-17)	0.0014	0.0042939
cg20664238	5.8	(1.7-20)	0.0053	0.00532123
cg20668644	4.8	(1.7-14)	0.0032	0.00440814
cg20673829	16	(3.9-67)	0.00012	9.66594e-05
cg20691140	6.2	(1.7-23)	0.0064	0.00587951
cg20718350	9.6	(2.5-36)	0.00088	0.00112219
cg20751361	7	(1.9-27)	0.0041	0.00480228
cg20764887	6.1	(1.7-21)	0.005	0.00300753
cg20792735	13	(3.7-48)	8.2e-05	0.0025154
cg20800509	5	(1.9-13)	0.0013	0.00232119
cg20803857	21	(5.6-77)	5.5e-06	1.40279e-05
cg20872937	12	(4.2-36)	4.6e-06	3.1526e-07
cg20884887	6.7	(2.4-19)	0.00028	1.14812e-05
cg20905516	4.1	(1.6-11)	0.0045	0.00688913
cg20925841	5.4	(1.9-15)	0.0015	0.00414828
cg20930366	38	(6.4-220)	5.6e-05	6.76733e-05
cg20978694	7.3	(2.3-24)	0.00086	0.00283865
cg20979852	7.2	(2.1-24)	0.0015	0.00534207
cg20980783	8.2	(2.5-26)	0.00042	8.94223e-07
cg20984085	7.2	(2.1-25)	0.0018	0.00284438
cg20987924	18	(4.3-75)	8.2e-05	0.000198998
cg21026830	3.9	(1.5-11)	0.0065	8.44449e-05
cg21039708	7.5	(2.6-21)	0.00019	8.85073e-05
cg21077559	18	(4.2-79)	9.9e-05	7.93119e-06
cg21114773	9.1	(2.7-31)	0.00038	0.00129709
cg21135135	9.8	(2.7-36)	0.00061	0.00499045
cg21145136	6.9	(2.3-21)	0.00058	0.000568687
cg21161253	5.4	(1.6-18)	0.0056	0.00288099
cg21185289	7.1	(2.1-24)	0.0016	0.000611215
cg21200539	7.5	(2.2-26)	0.0014	0.00965547
cg21239311	4.8	(1.5-16)	0.0089	0.00134578
cg21277995	5.3	(1.8-15)	0.0021	0.00699
cg21282630	4.7	(1.6-13)	0.0039	0.00622066
cg21306240	5.1	(1.7-15)	0.0038	0.00515692
cg21350575	5.3	(1.7-16)	0.0038	0.00319026
cg21383810	4.7	(1.8-12)	0.0017	0.00254703
cg21393713	5	(1.8-14)	0.0019	0.00504286
cg21426003	6.7	(2.3-20)	0.00056	0.000660008
cg21479226	4.5	(1.8-11)	0.001	0.00306744
cg21511365	7.4	(2.2-25)	0.0012	0.000321622
cg21517947	9.1	(2.9-28)	0.00013	2.13545e-05
cg21532325	7.8	(2.3-27)	0.001	0.00206919
cg21535000	4.3	(1.6-12)	0.0033	0.00576433
cg21546671	22	(6.1-79)	2.3e-06	1.99386e-08
cg21578219	7.2	(1.7-30)	0.0074	0.00927985
cg21667878	3.9	(1.5-10)	0.0063	0.00161505
cg21678377	4.7	(1.6-13)	0.004	0.00403005
cg21678445	6	(2.1-17)	0.00067	9.0498e-05
cg21678461	5	(1.5-16)	0.0085	0.00153387
cg21705897	4.1	(1.5-11)	0.005	0.00247638
cg21779611	11	(3.6-33)	2.4e-05	3.51819e-06
cg21844856	5.1	(1.5-18)	0.0099	0.00137578
cg21883754	6.1	(1.9-19)	0.0022	6.6857e-06
cg21884231	12	(3.1-46)	0.00028	5.7159e-05
cg21885046	9.4	(2.5-35)	0.00099	0.00219898
cg21920775	7.1	(1.8-28)	0.0058	0.00300951
cg21938148	7	(2.4-20)	0.00031	0.000117588
cg21956337	9	(2.8-29)	0.00024	6.54242e-05
cg21995919	9.6	(2.8-33)	0.00035	5.61456e-05
cg22001496	5.2	(1.9-14)	0.0017	0.00603813
cg22014661	4.5	(1.5-14)	0.0091	0.00396566
cg22049569	6.1	(1.6-23)	0.0074	0.00142208
cg22138430	22	(4.7-100)	7.8e-05	0.000427495
cg22153181	14	(4.1-49)	3.2e-05	0.000394349
cg22159514	4.1	(1.5-11)	0.0049	0.00255945
cg22204479	6.6	(2-22)	0.0018	0.000129933
cg22266749	8.9	(3-26)	7.9e-05	0.000201964
cg22286978	6.7	(2.3-20)	0.00055	0.0018863
cg22290744	12	(3.2-49)	0.00032	0.00206067
cg22298430	9.6	(3-30)	0.00011	0.000569153
cg22333214	4.1	(1.6-11)	0.0043	0.000250797
cg22333960	13	(3.3-53)	0.00025	0.00146319
cg22339356	6	(1.6-22)	0.0072	0.000630105
cg22346124	11	(2.8-39)	0.00042	0.00101741
cg22356339	12	(2.7-50)	0.001	0.000258883
cg22368664	5.3	(1.8-16)	0.0031	0.00290041
cg22403344	6	(1.6-23)	0.009	0.00652787
cg22435300	24	(4.1-140)	0.00041	0.00137544
cg22455914	5.7	(2.1-15)	0.00056	0.000241829
cg22500428	6	(2.2-16)	0.00035	0.000598318
cg22521696	8.5	(1.7-42)	0.0093	0.00190643
cg22531183	5.3	(1.9-15)	0.0017	0.00118852
cg22537474	6.7	(1.9-24)	0.003	0.00910633
cg22538054	5.7	(1.8-18)	0.0028	0.00808175
cg22634891	9.1	(2.1-39)	0.0031	0.00503376
cg22660147	32	(6.6-150)	1.5e-05	2.38108e-06
cg22674699	14	(3.2-61)	0.0005	0.00294498
cg22750155	5.9	(1.8-19)	0.0027	0.000157271
cg22757824	12	(3.5-41)	8.5e-05	3.04898e-05
cg22769941	9.7	(2.6-35)	0.00063	0.00270489
cg22802813	8.9	(2.2-35)	0.002	0.000252774
cg22830113	5.3	(2.1-13)	0.00031	0.000274391
cg22868282	11	(3.3-36)	7.5e-05	2.73386e-05
cg22878622	4.9	(1.6-15)	0.0044	0.00160442
cg22882665	6.8	(2.1-22)	0.0013	0.00162064
cg22926378	4	(1.4-11)	0.0087	0.00347817
cg22954449	9.8	(3.1-31)	0.00011	0.000162853
cg22961275	10	(2.8-40)	0.00055	0.00401885
cg22968936	8.2	(2.3-29)	0.0011	0.00527741
cg22978087	18	(3.6-92)	0.00046	0.00273187
cg22989103	26	(5.6-120)	2.8e-05	1.68296e-06
cg23080354	5.2	(1.7-16)	0.0038	0.00396549
cg23089825	6.3	(2-20)	0.0015	0.000252693
cg23103993	4.6	(1.6-14)	0.0052	0.00702577
cg23121993	7.1	(2.4-21)	0.00049	0.000662906
cg23148701	6.5	(1.9-22)	0.0028	0.00827768
cg23156916	7.4	(1.8-30)	0.0051	0.00393055
cg23170850	12	(2.7-52)	0.0011	0.000191229
cg23180938	6.9	(2.2-21)	0.00085	0.000313329
cg23207990	15	(3.9-56)	8e-05	4.77014e-06
cg23208513	9.3	(2.3-38)	0.0018	0.00383616
cg23217126	11	(2.5-44)	0.0012	5.32503e-05
cg23235241	6	(1.9-19)	0.002	0.00186335
cg23244289	11	(2.9-44)	0.00048	2.37513e-05
cg23244488	7.2	(2-26)	0.0028	0.00226749
cg23290344	8.7	(2-37)	0.0034	0.00986612
cg23300659	6.7	(2.1-22)	0.0015	3.45116e-05
cg23302682	11	(2.7-42)	0.0007	0.000248991
cg23318063	7.2	(2.1-25)	0.0019	0.00251843
cg23346462	8.6	(2.6-29)	0.00049	0.00614994
cg23347429	28	(5.9-130)	2.6e-05	0.000286976
cg23405575	5.2	(1.9-15)	0.0016	2.54829e-05
cg23437733	4.2	(1.5-12)	0.0078	0.000503672
cg23462956	7.6	(1.7-34)	0.0089	0.00225299
cg23495748	4.5	(1.5-13)	0.0067	0.00439947
cg23500059	6.8	(2-23)	0.0019	0.00102012
cg23524195	4.3	(1.5-13)	0.0082	0.000658708
cg23528400	4.8	(1.7-14)	0.0031	8.24863e-05
cg23536473	5.4	(1.7-17)	0.0039	0.00011262
cg23623622	9.5	(2.2-41)	0.0025	0.00190694
cg23632875	5.4	(1.7-17)	0.0037	0.00227971
cg23641852	6.9	(2.4-20)	0.00039	0.000148189
cg23642130	9.3	(2.4-36)	0.0012	0.000443608
cg23663774	4.2	(1.7-11)	0.0025	0.00264413
cg23664459	15	(3-71)	0.00093	0.00760917
cg23665824	14	(3.3-60)	0.00032	0.000499857
cg23671221	5	(1.6-15)	0.005	0.000540773
cg23685759	6	(1.9-19)	0.0023	0.000397288
cg23690528	11	(3.1-36)	0.00018	0.000151032
cg23699196	14	(3.9-51)	5.2e-05	1.54237e-05
cg23720732	14	(4.2-48)	1.8e-05	0.000248845
cg23727983	4.7	(1.6-14)	0.0055	0.00136068
cg23730181	5.9	(2.1-17)	0.00094	0.00107532
cg23766591	5.6	(1.7-19)	0.0044	0.000498508
cg23771603	6.2	(2-19)	0.0016	0.000101095
cg23797411	6	(2.1-18)	0.001	9.24836e-05
cg23808946	3.9	(1.4-11)	0.0079	0.000589433
cg23809442	3.8	(1.4-11)	0.0092	0.00214198
cg23811464	29	(8.2-100)	2e-07	4.34436e-06
cg23816347	8.6	(2.2-34)	0.002	0.00701286
cg23833588	7.1	(2.5-20)	0.00025	0.000407287
cg23858040	5.6	(1.9-16)	0.0017	0.000102779
cg23867997	5.1	(1.9-14)	0.0014	0.000243512
cg23881278	7.5	(2.3-24)	0.00079	0.000768031
cg23891360	5.6	(1.8-17)	0.0026	0.00207422
cg23906738	6.8	(1.9-24)	0.0028	0.000966384
cg23989821	5.7	(2.1-16)	0.0008	0.00131993
cg23989963	32	(6.1-170)	4.8e-05	7.77384e-06
cg24011260	7.7	(2.5-23)	0.00032	3.15233e-07
cg24031355	6.1	(1.6-23)	0.0074	0.00876221
cg24072474	12	(2.2-65)	0.0043	0.00407503
cg24109980	7.1	(2-25)	0.0025	0.000801543
cg24129382	16	(4.3-59)	3.6e-05	0.000331107
cg24150172	5.6	(1.8-17)	0.0025	0.000559358
cg24152605	4.6	(1.7-13)	0.003	0.00328713
cg24171907	4.8	(1.8-13)	0.0023	0.00343128
cg24198558	8.3	(2.5-27)	0.00058	5.64602e-05
cg24236409	4.8	(1.5-15)	0.0073	0.000270606
cg24266670	4.6	(1.5-14)	0.0088	0.00426826
cg24284973	5.6	(1.6-19)	0.0063	0.00355264
cg24347663	12	(2.8-52)	0.00092	0.000599299
cg24359323	8.9	(2.8-28)	0.00023	0.00456295
cg24403845	5.3	(2-15)	0.00099	0.000175131
cg24407243	12	(2.6-59)	0.0017	0.000832399
cg24416513	6.9	(2.3-21)	0.00062	0.00215794
cg24425021	7.8	(2.1-29)	0.0022	0.000617415
cg24446548	4	(1.6-11)	0.004	0.000144295
cg24454144	8.4	(2.6-28)	0.00045	0.00113231
cg24464397	11	(2.3-55)	0.0029	0.00132665
cg24472231	9.9	(2.2-45)	0.0029	0.000429586
cg24483247	14	(3.6-54)	0.00014	8.23932e-05
cg24485954	8.3	(2.5-28)	0.00063	0.00276004
cg24524352	7	(2.1-24)	0.0018	2.81844e-05
cg24530250	3.4	(1.5-7.9)	0.0044	0.000295476
cg24531255	5.7	(1.8-18)	0.0026	0.00112628
cg24556441	11	(2.8-44)	0.00056	0.00538683
cg24604013	4.9	(1.5-16)	0.0098	0.0056902
cg24610236	10	(3.2-31)	6.2e-05	0.00114691
cg24626079	6.2	(1.9-20)	0.0023	0.000212029
cg24637364	13	(3.2-51)	0.00031	0.00145396
cg24657817	9.5	(2.4-37)	0.0013	0.0070274
cg24663256	6	(1.7-21)	0.0052	0.00106013
cg24675150	4.2	(1.6-11)	0.0031	0.000738861
cg24718971	10	(2.6-41)	0.00094	0.00012297
cg24720580	100	(4.6-2400)	0.0035	0.00456936
cg24724633	5.2	(1.9-15)	0.0018	0.00118805
cg24740531	8.2	(2.6-26)	0.00031	0.000227009
cg24761507	5.9	(2.1-16)	0.00057	0.000194556
cg24795627	11	(2.7-45)	0.00083	0.00205015
cg24812837	5.9	(1.8-19)	0.003	0.00413321
cg24843380	4.4	(1.5-13)	0.0064	0.00674191
cg24847685	5.4	(1.9-15)	0.0014	0.0096827
cg24847829	5.7	(1.7-19)	0.0039	0.00558852
cg24870497	5.5	(1.5-20)	0.0089	0.00038738
cg24872782	4.6	(1.5-14)	0.0075	0.00738382
cg24876960	5.2	(1.5-17)	0.0081	0.00593046
cg24886267	16	(3.8-66)	0.00016	0.000870763
cg24891539	4.6	(1.5-14)	0.009	0.00541298
cg24896649	7.7	(2.3-26)	0.001	6.55323e-07
cg24912438	4.8	(1.6-15)	0.0063	0.00217901
cg24914278	11	(3.4-37)	6.4e-05	0.00101501
cg24924936	6.8	(1.9-25)	0.0038	0.00589599
cg24934063	10	(2.3-45)	0.0021	0.000507119
cg24946597	5.6	(1.9-16)	0.0018	0.000180077
cg24971209	5.4	(1.6-18)	0.006	0.000686713
cg24980653	6.7	(2.2-20)	0.00073	0.00028556
cg25024074	25	(5.4-120)	4e-05	0.000101403
cg25051341	7.2	(2.3-23)	0.00086	0.00351342
cg25081106	7.1	(2.5-21)	0.00027	0.000631399
cg25090499	6.6	(2.1-21)	0.0013	0.000352711
cg25116216	8.5	(2.5-29)	0.00055	0.000184725
cg25160286	21	(3.7-120)	0.00056	0.00180189
cg25181651	15	(3.7-64)	0.00018	0.000250157
cg25188395	8.1	(2.3-29)	0.0013	0.000285718
cg25189564	20	(4.7-83)	4.9e-05	2.76129e-06
cg25191628	12	(2.5-62)	0.002	0.00199151
cg25208017	5	(1.8-14)	0.0024	0.00742076
cg25260137	7.3	(1.6-32)	0.0092	0.00178841
cg25267072	6.7	(1.7-26)	0.0068	0.00223322
cg25317585	9.9	(3.3-29)	3.6e-05	2.57102e-07
cg25339566	6.8	(2.1-21)	0.0011	0.000946842
cg25397945	27	(4.2-180)	0.00057	0.00774686
cg25523509	4.7	(1.6-14)	0.0044	0.000750096
cg25539045	6.9	(2.4-20)	0.00033	2.22121e-05
cg25602684	20	(4.6-85)	6.4e-05	1.81644e-05
cg25644556	4.9	(1.5-16)	0.0097	0.00244038
cg25645268	11	(3.3-40)	0.00014	1.34911e-05
cg25655234	10	(2.5-45)	0.0015	0.00802864
cg25668236	4.8	(1.6-15)	0.0056	0.00812141
cg25670060	4	(1.5-10)	0.0048	0.00137555
cg25691167	5.2	(1.7-16)	0.0037	0.00607777
cg25720804	13	(3.2-56)	0.0004	3.05999e-05
cg25723050	7.1	(2.3-22)	0.00063	0.00427543
cg25730685	5.7	(1.9-17)	0.0018	0.0077234
cg25732462	5.7	(1.7-19)	0.005	0.00858074
cg25798792	7	(2.1-24)	0.0018	0.00502323
cg25825488	7.6	(2.2-26)	0.0012	0.00168351
cg25875213	6.6	(2.2-20)	0.00088	6.44305e-05
cg25881804	4.3	(1.5-13)	0.0079	0.000847012
cg25886284	7.6	(2.2-26)	0.0015	0.000233687
cg25902187	4.1	(1.6-10)	0.0028	0.00339352
cg25936054	6.1	(1.6-23)	0.007	0.00683114
cg25950235	4.8	(1.5-15)	0.0066	0.00486299
cg25958283	8.6	(2.8-26)	0.00019	0.000155897
cg25963041	6.3	(2.2-18)	0.0006	0.000493374
cg25973534	5.2	(1.8-15)	0.0025	0.00200103
cg25975712	8.9	(2.4-32)	0.00091	0.00150597
cg25976257	13	(3.2-54)	0.00039	0.000154834
cg25984671	5.1	(1.6-16)	0.0058	0.000671702
cg25999442	9.4	(2.7-33)	0.00043	0.000288992
cg26013553	24	(4.6-120)	0.00016	0.000414221
cg26063563	7.6	(2.7-21)	0.00013	2.41139e-05
cg26067203	5.8	(1.9-17)	0.0019	0.000453786
cg26110710	4.6	(1.6-13)	0.0055	0.00836985
cg26122980	6.3	(2.3-17)	0.00028	0.000211593
cg26132774	4.6	(1.6-13)	0.0038	0.00261849
cg26134895	5.8	(2-17)	0.0011	0.00390712
cg26156687	5.9	(1.9-18)	0.0021	0.000423795
cg26170604	6.1	(1.9-20)	0.0028	0.000860744
cg26198463	14	(2.6-69)	0.0017	3.42359e-05
cg26224223	35	(5.4-230)	0.0002	0.000845013
cg26246807	5.3	(1.8-15)	0.0019	0.000609405
cg26272220	6.2	(2.1-18)	0.00099	8.2127e-05
cg26295057	9.4	(3.2-27)	4.8e-05	6.61481e-06
cg26298979	7.4	(1.7-32)	0.0072	3.7183e-05
cg26307359	5.7	(2.1-15)	0.00058	0.000190822
cg26309134	6.5	(2-21)	0.0018	0.00147183
cg26327071	9.1	(2.4-34)	0.0011	3.58454e-05
cg26328510	5.5	(1.8-16)	0.0022	0.000271567
cg26337020	12	(3.3-46)	0.00021	0.000292475
cg26365854	7.4	(2.3-23)	0.00063	0.000612245
cg26381364	8	(2.3-28)	0.0011	0.00272353
cg26385256	13	(3.9-44)	3.4e-05	0.000162263
cg26387689	11	(2.7-46)	0.00094	0.00278518
cg26429655	14	(3.4-55)	0.00022	0.00124786
cg26460092	9.4	(2.5-35)	0.00078	3.92328e-05
cg26476852	5.1	(1.5-18)	0.0098	0.00184457
cg26483578	5.4	(1.8-16)	0.0026	0.00156158
cg26492446	11	(3.1-36)	0.00016	0.00188652
cg26521404	17	(3.5-79)	0.00044	0.000150028
cg26565021	10	(2.5-40)	0.0011	8.02146e-05
cg26595278	8.2	(2.5-27)	0.00057	6.13449e-05
cg26620450	6.4	(1.7-24)	0.0058	0.000794781
cg26650638	5.1	(1.6-17)	0.0063	0.00159409
cg26650846	8.5	(2.1-34)	0.0024	0.000622354
cg26673012	10	(1.9-58)	0.0073	0.000575769
cg26682580	9.5	(2.5-35)	0.00079	0.000998101
cg26692294	22	(4.2-110)	0.00025	0.000280088
cg26705960	13	(3.5-48)	0.00014	0.00036138
cg26715952	7.8	(2.1-29)	0.0024	0.000851436
cg26721264	6.8	(2.2-21)	0.00084	0.00288512
cg26731327	5.8	(1.8-19)	0.004	0.00206852
cg26777883	6.9	(2.1-22)	0.0014	0.000473327
cg26789779	17	(4.2-66)	6.9e-05	7.46446e-05
cg26813646	35	(5.3-230)	0.00023	0.000558387
cg26814276	8.3	(2.9-24)	7.5e-05	4.53358e-06
cg26818735	9.1	(2-42)	0.0042	0.000849669
cg26858704	6.5	(2.1-20)	0.0013	0.00614575
cg26866482	4.3	(1.6-11)	0.0032	0.00236579
cg26877715	5.6	(1.8-18)	0.0035	0.00799929
cg26892444	11	(2.4-49)	0.0021	0.00642285
cg26976732	4.1	(1.4-12)	0.0081	0.00192977
cg27018185	4.9	(1.5-16)	0.008	0.00193126
cg27021357	5	(1.8-14)	0.0021	0.00142017
cg27034819	12	(2.6-57)	0.0014	3.04141e-05
cg27037018	4.3	(1.6-12)	0.0037	0.00298771
cg27039662	5.9	(1.8-19)	0.0028	5.18663e-05
cg27058257	18	(4.2-78)	0.0001	0.00054236
cg27062795	17	(2.9-94)	0.0015	0.000542223
cg27076139	6	(1.6-23)	0.008	0.00438773
cg27107171	5.5	(2-15)	0.0011	0.00266362
cg27111463	8.7	(2.2-34)	0.002	0.00109172
cg27199384	4.4	(1.5-13)	0.0071	0.00046669
cg27199820	5.6	(1.7-19)	0.0053	0.00471311
cg27200446	6.9	(2.1-22)	0.0013	0.00101471
cg27207796	8	(2.4-27)	0.0008	0.00072703
cg27230784	7.3	(2.4-22)	0.00046	0.00903857
cg27237300	9.2	(2.2-38)	0.0021	0.00198112
cg27252696	4.6	(1.5-14)	0.0061	8.95971e-05
cg27277463	5.7	(1.7-19)	0.0045	0.00876146
cg27308329	5.2	(1.8-15)	0.003	0.00719619
cg27312388	4.3	(1.5-13)	0.0082	0.00126914
cg27331241	4.8	(1.7-14)	0.0028	0.000135153
cg27341472	3.6	(1.4-9.1)	0.0069	0.000980782
cg27360326	6.3	(1.8-22)	0.0036	0.0019407
cg27376182	15	(3.9-58)	8.1e-05	0.000264036
cg27392850	9.5	(2.8-33)	0.00038	0.00397988
cg27398263	4.2	(1.4-12)	0.0083	0.0015158
cg27420520	13	(3.1-57)	0.00047	0.000207893
cg27423760	12	(2.8-50)	0.00078	0.00497107
cg27477373	4.1	(1.5-11)	0.007	0.00142897
cg27501878	9	(2.8-29)	0.00022	0.000561378
cg27504802	4	(1.5-11)	0.0067	0.00195951
cg27510182	4.8	(1.5-16)	0.0083	0.00239817
cg27555582	4.8	(1.9-12)	0.0011	0.0010885
cg27593384	5.7	(1.6-21)	0.008	0.0036741
cg27600205	6.1	(2.1-17)	0.00069	0.00103149
cg27618240	13	(3.1-51)	0.00042	4.4449e-06
cg27648738	4.7	(1.8-12)	0.0018	0.00223523

## Sheet: Table 5
Methy point	Chromosome	Start	End	Symbol	Lasso Coefficient
cg13512069	chr15	82262772	82262773	EFTUD1	1.22556
cg00609645	chr6	26204846	26204847	HIST1H4E	1.46108
cg23811464	chr12	24563270	24563271	RP11-444D3.1	0.539056
cg03502002	chr18	77250177	77250178	GALR1	0.518772

## Sheet: Table 6
	Hugo_Symbol	High	Low	pval	or	ci.up	ci.low	adjPval
1	KRAS	70	46	2.33699e-05	7.50553	26.939	2.5756	0.000794575
2	RNF43	10	1	0.00922624	10.6375	472.823	1.44247	0.116209
3	CDKN2A	17	5	0.010386	3.83519	14.1439	1.25667	0.116209
4	ADAMTS16	7	0	0.0136717	Inf	Inf	1.43267	0.116209
5	TTN	17	6	0.0229002	3.15119	10.4399	1.09309	0.124732
6	BTBD11	6	0	0.0284246	Inf	Inf	1.15641	0.124732
7	TP53	55	41	0.0559156	2.00243	4.29332	0.949861	0.124732
8	ANK3	5	0	0.0586975	Inf	Inf	0.890067	0.124732
9	COL11A1	5	0	0.0586975	Inf	Inf	0.890067	0.124732
10	COL6A2	5	0	0.0586975	Inf	Inf	0.890067	0.124732
11	FLT4	5	0	0.0586975	Inf	Inf	0.890067	0.124732
12	IGSF10	5	0	0.0586975	Inf	Inf	0.890067	0.124732
13	KMT2C	5	0	0.0586975	Inf	Inf	0.890067	0.124732
14	NTF3	5	0	0.0586975	Inf	Inf	0.890067	0.124732
15	PCDH9	5	0	0.0586975	Inf	Inf	0.890067	0.124732
16	SSPO	5	0	0.0586975	Inf	Inf	0.890067	0.124732
17	FLG	7	1	0.0636603	7.12851	328.785	0.878279	0.127321
18	FBN3	6	1	0.116942	6.02556	283.514	0.702977	0.22089
19	MUC16	9	3	0.131025	3.06876	18.3872	0.724435	0.234466
20	APBA2	5	1	0.210062	4.95354	239.517	0.534761	0.310526
21	FAT4	5	1	0.210062	4.95354	239.517	0.534761	0.310526
22	PCDHB7	5	1	0.210062	4.95354	239.517	0.534761	0.310526
23	RELN	5	1	0.210062	4.95354	239.517	0.534761	0.310526
24	SMAD4	20	13	0.242307	1.617	3.90785	0.68873	0.343268
25	PCDH15	6	2	0.276786	2.97929	31.1763	0.509885	0.348545
26	RREB1	6	2	0.276786	2.97929	31.1763	0.509885	0.348545
27	TGFBR2	6	2	0.276786	2.97929	31.1763	0.509885	0.348545
28	ADAMTS12	5	2	0.442862	2.45009	26.5562	0.385227	0.470541
29	COL5A1	5	2	0.442862	2.45009	26.5562	0.385227	0.470541
30	FAT2	5	2	0.442862	2.45009	26.5562	0.385227	0.470541
31	FAT3	5	2	0.442862	2.45009	26.5562	0.385227	0.470541
32	MYO18B	5	2	0.442862	2.45009	26.5562	0.385227	0.470541
33	GNAS	4	5	0.740377	0.745174	3.62568	0.141552	0.762813
34	RYR1	5	4	1	1.19496	6.29016	0.245595	1

## Sheet: Table 7
TCGA_id	B_cell	T_cell.CD4	T_cell.CD8	Neutrophil	Macrophage	DC	sample
TCGA-2J-AAB4	0.0961778	0.149689	0.182085	0.12589	0.0421599	0.507786	low
TCGA-2J-AAB8	0.103763	0.134433	0.172102	0.116514	0.0477311	0.507047	low
TCGA-2J-AAB9	0.0881593	0.139711	0.187265	0.114635	0.06258	0.495345	low
TCGA-2J-AABH	0.0905703	0.140011	0.156035	0.114162	0.0512583	0.454596	low
TCGA-2J-AABK	0.10013	0.137396	0.174057	0.10976	0.0293163	0.466837	low
TCGA-2J-AABP	0.084724	0.121451	0.22945	0.119789	0.137317	0.584681	low
TCGA-2J-AABR	0.107313	0.149812	0.24084	0.13398	0.0794048	0.51694	low
TCGA-2J-AABT	0.102662	0.147415	0.183134	0.11044	0.0675492	0.525166	low
TCGA-2J-AABV	0.0749448	0.115159	0.145123	0.0916749	0	0.403609	low
TCGA-2L-AAQI	0.109928	0.131981	0.169824	0.108154	0.0366976	0.488207	low
TCGA-2L-AAQM	0.072663	0.1164	0.167985	0.0990224	0.0631067	0.413769	low
TCGA-3A-A9I5	0.103898	0.142245	0.152862	0.109024	0.044541	0.471221	low
TCGA-3A-A9I7	0.119906	0.148544	0.171547	0.104355	0.0501331	0.512925	low
TCGA-3A-A9IB	0.0964261	0.125329	0.184322	0.107546	0.063509	0.531861	low
TCGA-3A-A9IC	0.0917525	0.125228	0.166637	0.107855	0.0450544	0.514777	low
TCGA-3A-A9IJ	0.0666187	0.112165	0.172078	0.0915674	0.0732874	0.426021	low
TCGA-3A-A9IL	0.0817333	0.125682	0.16025	0.0916495	0.0884291	0.428844	low
TCGA-3A-A9IN	0.0787731	0.128696	0.163665	0.0988762	0.0744463	0.424517	low
TCGA-3A-A9IO	0.0670981	0.110273	0.169537	0.0857255	0.173378	0.398316	low
TCGA-3A-A9IR	0.0878054	0.138002	0.17979	0.0968003	0.0829365	0.422853	low
TCGA-3A-A9IS	0.0663114	0.110586	0.170499	0.0844737	0.13589	0.385026	low
TCGA-3A-A9IV	0.0857119	0.111557	0.165134	0.0984176	0.111463	0.405362	low
TCGA-3A-A9IX	0.113514	0.150748	0.217518	0.115076	0.0529847	0.54892	low
TCGA-3A-A9IZ	0.0948129	0.12339	0.177494	0.118488	0.0224698	0.492694	low
TCGA-3E-AAAY	0.106909	0.14054	0.192056	0.129725	0.059622	0.540845	low
TCGA-F2-6880	0.0806108	0.108964	0.150533	0.090775	0.00202491	0.400319	low
TCGA-F2-7273	0.125578	0.130241	0.232497	0.130991	0.13547	0.55196	low
TCGA-F2-7276	0.125633	0.141038	0.225632	0.133258	0.0831755	0.550933	low
TCGA-F2-A44H	0.0856188	0.124495	0.162212	0.112929	0.0410159	0.537558	low
TCGA-FB-A7DR	0.0957499	0.136417	0.174269	0.121588	0.055909	0.505706	low
TCGA-FB-AAPQ	0.107816	0.13013	0.166788	0.108655	0.0341007	0.475558	low
TCGA-FB-AAPS	0.101425	0.153288	0.202012	0.119035	0.0889155	0.515097	low
TCGA-FB-AAPY	0.122955	0.144069	0.184528	0.113015	0.0212675	0.556237	low
TCGA-H6-A45N	0.111561	0.144501	0.200324	0.11578	0.0684868	0.52567	low
TCGA-H8-A6C1	0.125225	0.142388	0.164377	0.1089	0.0145154	0.531723	low
TCGA-HV-A5A5	0.100956	0.1454	0.178315	0.123544	0.0462457	0.514987	low
TCGA-HV-A5A6	0.0889186	0.144659	0.166385	0.112936	0.0433127	0.499266	low
TCGA-HV-AA8V	0.0798011	0.135045	0.167292	0.114617	0.064897	0.493161	low
TCGA-HZ-7289	0.0926864	0.111199	0.18895	0.0914334	0.0220645	0.456912	low
TCGA-HZ-7924	0.133115	0.133691	0.206112	0.109086	0.0520327	0.504952	low
TCGA-HZ-8638	0.100188	0.119025	0.205478	0.139053	0.0218103	0.486194	low
TCGA-HZ-A77Q	0.120002	0.134443	0.206428	0.140738	0.0683506	0.570273	low
TCGA-IB-7644	0.110827	0.138051	0.194052	0.108176	0.037929	0.519418	low
TCGA-IB-7645	0.118145	0.143975	0.241959	0.127777	0.0956003	0.625756	low
TCGA-IB-7888	0.171573	0.141618	0.238716	0.125553	0.0873755	0.585846	low
TCGA-IB-7891	0.120582	0.13602	0.212246	0.120418	0.0612329	0.59762	low
TCGA-IB-7897	0.107787	0.159937	0.270347	0.129103	0.115097	0.571382	low
TCGA-IB-A5SO	0.129023	0.138822	0.200732	0.121733	0.0717947	0.516837	low
TCGA-IB-A5SQ	0.096781	0.145228	0.175889	0.116639	0.0596532	0.561669	low
TCGA-IB-A7M4	0.110208	0.142871	0.189235	0.108466	0.0327941	0.506289	low
TCGA-IB-AAUP	0.317363	0.244725	0.202565	0.118366	0.07196	0.556091	low
TCGA-IB-AAUR	0.341956	0.236856	0.245221	0.121039	0.0288268	0.604802	low
TCGA-IB-AAUS	0.0527962	0.128533	0.225471	0.149432	0.186107	0.604495	low
TCGA-IB-AAUT	0.097579	0.140791	0.234516	0.12139	0.0793466	0.539988	low
TCGA-IB-AAUU	0.112525	0.138609	0.173599	0.116383	0.0321575	0.546378	low
TCGA-IB-AAUV	0.109193	0.150612	0.231159	0.119673	0.166295	0.472438	low
TCGA-IB-AAUW	0.116876	0.140702	0.210031	0.122713	0.0669863	0.493927	low
TCGA-LB-A8F3	0.0764407	0.154696	0.132134	0.0979465	0.0340561	0.472608	low
TCGA-LB-A9Q5	0.0929808	0.123061	0.152316	0.108101	0.0127784	0.496502	low
TCGA-M8-A5N4	0.101141	0.15464	0.150623	0.126009	0.0447408	0.536328	low
TCGA-Q3-A5QY	0.3586	0.352989	0.239907	0.125463	0.0454615	0.598924	low
TCGA-RB-AA9M	0.113171	0.127533	0.21284	0.115579	0.051879	0.512162	low
TCGA-US-A776	0.0942477	0.143304	0.16358	0.0949448	0.0117084	0.43794	low
TCGA-US-A77J	0.297281	0.184194	0.235303	0.123445	0.0673022	0.548286	low
TCGA-XD-AAUG	0.100346	0.136793	0.200369	0.112686	0.107168	0.465314	low
TCGA-XD-AAUH	0.163935	0.172028	0.225573	0.113758	0.0855193	0.511507	low
TCGA-XD-AAUI	0.133279	0.157618	0.181557	0.110841	0.0572236	0.502354	low
TCGA-XD-AAUL	0.109276	0.132909	0.179983	0.121943	0.0624736	0.529632	low
TCGA-XN-A8T3	0.122598	0.129977	0.204748	0.107027	0.0552058	0.532178	low
TCGA-XN-A8T5	0.19757	0.170434	0.221347	0.113583	0.03377	0.541019	low
TCGA-YB-A89D	0.0884662	0.13633	0.180836	0.116269	0.0503375	0.55644	low
TCGA-YH-A8SY	0.0801833	0.131161	0.156964	0.114355	0.0440594	0.480488	low
TCGA-2J-AAB1	0.100699	0.165194	0.180397	0.110867	0.0490824	0.480198	high
TCGA-2J-AAB6	0.0821737	0.125168	0.159696	0.114653	0.0391716	0.50206	high
TCGA-2J-AABA	0.113014	0.137875	0.200259	0.11398	0.0758424	0.450662	high
TCGA-2J-AABE	0.0858116	0.140768	0.163529	0.122778	0.043226	0.507032	high
TCGA-2J-AABF	0.100483	0.168176	0.160855	0.137939	0.0566996	0.569027	high
TCGA-2J-AABI	0.128962	0.110724	0.210593	0.1366	0	0.543847	high
TCGA-2J-AABO	0.0952315	0.129554	0.202691	0.103055	0.0676753	0.474326	high
TCGA-2J-AABU	0.105172	0.124293	0.19563	0.106674	0.0422747	0.490584	high
TCGA-2L-AAQA	0.107742	0.137184	0.163971	0.107396	0.0263951	0.471252	high
TCGA-2L-AAQE	0.104873	0.138128	0.18431	0.109679	0.0270002	0.492335	high
TCGA-2L-AAQJ	0.121178	0.141099	0.178002	0.113941	0.0414351	0.494808	high
TCGA-2L-AAQL	0.0881192	0.132703	0.185294	0.109847	0.042997	0.512346	high
TCGA-3A-A9I9	0.0826672	0.131595	0.164138	0.104847	0.0276424	0.493182	high
TCGA-3A-A9IH	0.0941669	0.1426	0.172769	0.107275	0.0343673	0.494983	high
TCGA-3A-A9IU	0.097537	0.133506	0.170837	0.11217	0.031969	0.490803	high
TCGA-3A-A9J0	0.0963709	0.13468	0.165635	0.109558	0.0473674	0.487095	high
TCGA-3E-AAAZ	0.102149	0.132698	0.175306	0.103605	0.0464207	0.458632	high
TCGA-F2-6879	0.113788	0.129071	0.188033	0.115699	0.0382076	0.519045	high
TCGA-F2-A44G	0.101002	0.131112	0.169229	0.126821	0.0405731	0.511626	high
TCGA-F2-A7TX	0.124124	0.141022	0.195324	0.122595	0.0215231	0.561813	high
TCGA-F2-A8YN	0.105101	0.13119	0.168356	0.112975	0.0344323	0.510311	high
TCGA-FB-A5VM	0.0950881	0.121737	0.200316	0.114598	0.0376407	0.530944	high
TCGA-FB-AAPP	0.100839	0.122266	0.155721	0.0973956	0.0271756	0.422273	high
TCGA-FB-AAPU	0.108474	0.127689	0.166811	0.104442	0.0202291	0.451565	high
TCGA-FB-AAPZ	0.0997472	0.135367	0.200934	0.117137	0.0471968	0.525909	high
TCGA-FB-AAQ0	0.0954664	0.144768	0.15385	0.104476	0.0239395	0.44014	high
TCGA-FB-AAQ1	0.0987831	0.141045	0.161494	0.105037	0.0388806	0.504324	high
TCGA-FB-AAQ2	0.103387	0.139086	0.165454	0.10246	0.0298237	0.466407	high
TCGA-FB-AAQ3	0.0840911	0.140771	0.178509	0.120844	0.0286042	0.491466	high
TCGA-FB-AAQ6	0.11567	0.137368	0.16914	0.101499	0.0384897	0.460566	high
TCGA-H6-8124	0.0981659	0.115652	0.192625	0.101547	0.0570731	0.481083	high
TCGA-HV-A5A3	0.0947589	0.130575	0.173796	0.106112	0.0420964	0.460877	high
TCGA-HV-A5A4	0.101477	0.14152	0.167097	0.114013	0.0373478	0.498797	high
TCGA-HV-A7OL	0.148673	0.148476	0.158259	0.12086	0.0142222	0.517979	high
TCGA-HV-A7OP	0.0735919	0.122726	0.146117	0.093802	0.0119076	0.425252	high
TCGA-HV-AA8X	0.110546	0.148959	0.152736	0.109935	0.00854869	0.514944	high
TCGA-HZ-7925	0.0885791	0.122613	0.191771	0.134988	0.0773452	0.519032	high
TCGA-HZ-8005	0.125124	0.133691	0.164526	0.0990498	0.0636122	0.553198	high
TCGA-HZ-A4BH	0.116814	0.176187	0.184827	0.126971	0.038107	0.552316	high
TCGA-HZ-A4BK	0.102486	0.154558	0.184204	0.118433	0.0604226	0.514899	high
TCGA-HZ-A9TJ	0.107501	0.123298	0.178178	0.101049	0.0341191	0.478451	high
TCGA-IB-7646	0.114251	0.129579	0.179479	0.137973	0.0740566	0.571714	high
TCGA-IB-7649	0.112484	0.127992	0.246523	0.123233	0.0713716	0.580361	high
TCGA-IB-7651	0.147809	0.134234	0.200887	0.120619	0.074037	0.62555	high
TCGA-IB-7652	0.103211	0.118308	0.200294	0.120595	0.0797336	0.580956	high
TCGA-IB-7654	0.105444	0.138305	0.180032	0.107366	0.053635	0.487995	high
TCGA-IB-7885	0.0983653	0.146085	0.185555	0.126979	0.0426665	0.573532	high
TCGA-IB-7886	0.12142	0.11893	0.207531	0.119299	0.0508098	0.562284	high
TCGA-IB-7887	0.122519	0.117894	0.201777	0.116423	0.0290344	0.529562	high
TCGA-IB-7889	0.119822	0.135926	0.220045	0.116693	0.0526335	0.557563	high
TCGA-IB-7890	0.100794	0.115537	0.194756	0.107045	0.103394	0.54192	high
TCGA-IB-7893	0.0978138	0.104151	0.195471	0.117786	0.0895415	0.537557	high
TCGA-IB-8127	0.10037	0.133844	0.221275	0.128548	0.0690886	0.546403	high
TCGA-IB-A5SP	0.0976658	0.128893	0.170811	0.102446	0.0288203	0.487081	high
TCGA-IB-A5SS	0.0717016	0.101589	0.19627	0.113392	0.088934	0.544808	high
TCGA-IB-A6UF	0.0926201	0.133062	0.178451	0.109223	0.0557218	0.471392	high
TCGA-IB-A6UG	0.114506	0.133389	0.179258	0.107754	0.0294505	0.455672	high
TCGA-IB-A7LX	0.103707	0.130645	0.177083	0.111231	0.0410976	0.45946	high
TCGA-IB-AAUN	0.111176	0.143062	0.167813	0.108417	0.025603	0.502177	high
TCGA-IB-AAUO	0.0957015	0.144559	0.157088	0.140803	0.00135951	0.492619	high
TCGA-IB-AAUQ	0.0928121	0.141411	0.168732	0.115765	0.103075	0.445076	high
TCGA-L1-A7W4	0.0907314	0.0988439	0.208955	0.111158	0.0369716	0.499291	high
TCGA-LB-A7SX	0.108907	0.115064	0.179306	0.139876	0.0165624	0.460924	high
TCGA-OE-A75W	0.08308	0.134877	0.199223	0.104971	0.0243276	0.494397	high
TCGA-PZ-A5RE	0.0813093	0.125616	0.179196	0.120616	0.0600274	0.531087	high
TCGA-Q3-AA2A	0.0910361	0.136351	0.169634	0.106044	0.0427784	0.47439	high
TCGA-RB-A7B8	0.0990828	0.148751	0.164311	0.115415	0.0516749	0.483451	high
TCGA-S4-A8RM	0.134392	0.147005	0.171795	0.104302	0.0240911	0.485417	high
TCGA-S4-A8RO	0.107589	0.129018	0.170862	0.108456	0.0363154	0.488804	high
TCGA-S4-A8RP	0.104701	0.156121	0.172476	0.111928	0.0457934	0.512585	high
TCGA-US-A774	0.108737	0.13322	0.189908	0.116003	0.0501308	0.52935	high
TCGA-US-A779	0.087284	0.135403	0.163208	0.102309	0.0190414	0.454204	high
TCGA-US-A77E	0.0967734	0.145823	0.168818	0.116123	0.065275	0.449303	high
TCGA-YY-A8LH	0.102561	0.151859	0.150608	0.106902	0.00417436	0.466411	high

## Sheet: Table 8
gene_name	gene_biotype	log2FoldChange	lfcSE	stat	pvalue	padj
CASP14	protein_coding	4.23379	0.637294	6.64339	3.06543e-11	1.66577e-09
SLURP1	protein_coding	4.06456	0.449637	9.03964	1.57196e-19	8.43295e-17
LYPD2	protein_coding	3.3311	0.458331	7.2679	3.6511e-13	3.38877e-11
MUC21	protein_coding	3.3144	0.435314	7.61381	2.66136e-14	3.21275e-12
FGF23	protein_coding	2.82561	0.506425	5.57953	2.41168e-08	5.8768e-07
S100A2	protein_coding	2.76862	0.361248	7.66404	1.80171e-14	2.27582e-12
HOXC12	protein_coding	2.60488	0.633235	4.1136	3.89531e-05	0.000324662
RPTN	protein_coding	2.58004	0.498395	5.17669	2.25855e-07	4.00544e-06
CGB5	protein_coding	2.57156	0.479719	5.36056	8.29632e-08	1.69785e-06
LY6D	protein_coding	2.5305	0.435753	5.80719	6.35305e-09	1.82768e-07
KRT6A	protein_coding	2.4568	0.431958	5.68758	1.2885e-08	3.41746e-07
SLCO1B7	protein_coding	2.45327	0.528999	4.63756	3.52541e-06	4.18114e-05
MAGEA6	protein_coding	2.45152	0.903138	2.71445	0.00663869	0.0236347
PAX7	protein_coding	2.37693	0.648841	3.66335	0.000248935	0.00154534
KRT4	protein_coding	2.35215	0.411639	5.71412	1.10275e-08	2.96452e-07
ARL14EPL	protein_coding	2.3007	0.413909	5.55848	2.72127e-08	6.50835e-07
KRT5	protein_coding	2.27594	0.424581	5.36044	8.30218e-08	1.69814e-06
IVL	protein_coding	2.25774	0.519044	4.3498	1.36262e-05	0.000132164
FGF3	protein_coding	2.2413	0.452966	4.94806	7.49573e-07	1.12975e-05
AC011604.2	protein_coding	2.21188	0.521457	4.24174	2.21798e-05	0.000201498
UPK3B	protein_coding	2.19266	0.333354	6.57757	4.7821e-11	2.44863e-09
NTF4	protein_coding	2.12611	0.287815	7.38708	1.50086e-13	1.51464e-11
LCE3D	protein_coding	2.09613	0.641527	3.2674	0.0010854	0.00533497
A2ML1	protein_coding	2.09573	0.440912	4.75316	2.00257e-06	2.60521e-05
IL36RN	protein_coding	2.06722	0.448365	4.61057	4.01558e-06	4.67875e-05
MUC16	protein_coding	2.01838	0.372518	5.4182	6.02013e-08	1.28583e-06
SLCO1B3	protein_coding	2.00295	0.421221	4.7551	1.98347e-06	2.58325e-05
ALPP	protein_coding	1.98228	0.401012	4.94318	7.68579e-07	1.15248e-05
SPRR2D	protein_coding	1.97988	0.481176	4.11467	3.87741e-05	0.00032338
SYCE1	protein_coding	1.94356	0.369203	5.26421	1.40793e-07	2.67072e-06
GJB6	protein_coding	1.93845	0.35709	5.42847	5.68388e-08	1.22154e-06
LIPK	protein_coding	1.92485	0.425168	4.52726	5.97522e-06	6.55585e-05
KRT14	protein_coding	1.92059	0.405243	4.73935	2.14402e-06	2.75938e-05
IL36B	protein_coding	1.90392	0.448914	4.24116	2.22369e-05	0.000201921
IFNL3	protein_coding	1.90354	0.470705	4.04402	5.25415e-05	0.000419222
CYP2A13	protein_coding	1.89669	0.645691	2.93746	0.0033091	0.0134033
FAM83A	protein_coding	1.83762	0.344678	5.33143	9.74427e-08	1.94513e-06
CYP24A1	protein_coding	1.83115	0.394801	4.63816	3.51517e-06	4.17475e-05
CYP2W1	protein_coding	1.81743	0.282017	6.44441	1.16055e-10	5.2704e-09
LGR6	protein_coding	1.80549	0.259057	6.96947	3.18133e-12	2.21457e-10
PADI3	protein_coding	1.80086	0.382842	4.70393	2.55206e-06	3.20664e-05
FBN3	protein_coding	1.79942	0.346287	5.19631	2.03279e-07	3.67511e-06
TNNT1	protein_coding	1.78663	0.328383	5.44069	5.30752e-08	1.15299e-06
TMPRSS11E	protein_coding	1.77952	0.364652	4.88007	1.06049e-06	1.51459e-05
KRT13	protein_coding	1.77891	0.403601	4.40761	1.04519e-05	0.000105625
CGB8	protein_coding	1.77041	0.401149	4.41335	1.01783e-05	0.000103264
IFNA1	protein_coding	1.77007	0.474373	3.73139	0.000190423	0.00123611
AC022335.1	protein_coding	1.75559	0.65981	2.66075	0.00779667	0.027016
NTSR1	protein_coding	1.74681	0.362655	4.81674	1.45925e-06	1.99519e-05
TMEM40	protein_coding	1.73424	0.359018	4.83051	1.36181e-06	1.87812e-05
SYT8	protein_coding	1.72816	0.30095	5.74237	9.33629e-09	2.5494e-07
IL20RB	protein_coding	1.72399	0.321299	5.36568	8.06463e-08	1.65488e-06
CCK	protein_coding	1.72024	0.377797	4.55334	5.28003e-06	5.91534e-05
DUSP27	protein_coding	1.71269	0.379475	4.51333	6.38185e-06	6.95368e-05
TLX1	protein_coding	1.70296	0.274289	6.20864	5.34452e-10	2.0932e-08
CGB3	protein_coding	1.6907	0.495485	3.41222	0.000644356	0.00345083
UGT1A6	protein_coding	1.68639	0.326496	5.1651	2.40306e-07	4.22635e-06
SLCO1B1	protein_coding	1.6798	0.453991	3.70008	0.000215529	0.00136916
ZBED2	protein_coding	1.67913	0.314452	5.33986	9.30184e-08	1.87151e-06
TNNI2	protein_coding	1.67315	0.297699	5.62026	1.90666e-08	4.7851e-07
CLIC3	protein_coding	1.67044	0.244165	6.84143	7.84043e-12	4.98481e-10
TGM5	protein_coding	1.66209	0.320071	5.19286	2.07089e-07	3.73338e-06
PKP1	protein_coding	1.66052	0.297211	5.58701	2.31014e-08	5.65629e-07
GPR87	protein_coding	1.65598	0.339538	4.87715	1.07631e-06	1.53316e-05
USP26	protein_coding	1.65504	0.604634	2.73726	0.00619537	0.0223781
KLHDC7B	protein_coding	1.63565	0.328193	4.98379	6.23504e-07	9.66862e-06
DMBX1	protein_coding	1.62865	0.299227	5.44286	5.24324e-08	1.14228e-06
NPSR1	protein_coding	1.62121	0.473263	3.42561	0.00061342	0.00331728
PSCA	protein_coding	1.62027	0.368285	4.3995	1.08499e-05	0.000109083
IFNE	protein_coding	1.61899	0.35408	4.57237	4.82244e-06	5.47505e-05
AC008687.1	protein_coding	1.61551	0.490217	3.29551	0.000982442	0.00491091
SPRR1B	protein_coding	1.61438	0.423756	3.8097	0.000139135	0.000949645
EN2	protein_coding	1.61329	0.432891	3.72679	0.000193931	0.00125409
SERPINB4	protein_coding	1.61006	0.39005	4.12783	3.66205e-05	0.000308828
RHCG	protein_coding	1.60722	0.343503	4.6789	2.88412e-06	3.54676e-05
HRASLS2	protein_coding	1.6071	0.272751	5.89218	3.81144e-09	1.16877e-07
SERPINB3	protein_coding	1.60353	0.435342	3.68338	0.000230159	0.00144835
EMX1	protein_coding	1.598	0.342719	4.66272	3.1205e-06	3.77927e-05
CYP2B6	protein_coding	1.58714	0.333773	4.75516	1.98284e-06	2.58325e-05
CGB7	protein_coding	1.58534	0.267744	5.92109	3.19822e-09	1.00166e-07
AC107871.1	protein_coding	1.57966	0.345879	4.5671	4.9452e-06	5.59443e-05
KISS1	protein_coding	1.57375	0.29507	5.33347	9.6355e-08	1.92644e-06
CDH16	protein_coding	1.56638	0.338204	4.63147	3.63072e-06	4.29594e-05
WFDC5	protein_coding	1.56486	0.392076	3.9912	6.57386e-05	0.000504574
PADI1	protein_coding	1.55712	0.358281	4.3461	1.38579e-05	0.000134111
C6orf15	protein_coding	1.54885	0.464313	3.33579	0.000850573	0.00435352
IFITM5	protein_coding	1.53924	0.346663	4.44015	8.9895e-06	9.28323e-05
CRCT1	protein_coding	1.53547	0.377765	4.06463	4.81094e-05	0.000389893
DNAH2	protein_coding	1.53417	0.205068	7.48126	7.3612e-14	7.75712e-12
ANXA8	protein_coding	1.53295	0.321464	4.76867	1.85445e-06	2.44442e-05
KCNA7	protein_coding	1.52477	0.338402	4.50578	6.61291e-06	7.16045e-05
MIA-RAB4B	protein_coding	1.51666	0.338607	4.47911	7.49566e-06	7.99377e-05
SCEL	protein_coding	1.5119	0.275196	5.49389	3.93172e-08	8.93289e-07
DKK4	protein_coding	1.50936	0.311334	4.84804	1.24685e-06	1.74353e-05
KRT74	protein_coding	1.50376	0.560263	2.68402	0.00727419	0.025471
MSLNL	protein_coding	1.50042	0.322015	4.65947	3.1703e-06	3.82471e-05
ENTHD1	protein_coding	1.49917	0.304417	4.92473	8.44758e-07	1.2471e-05
KLK7	protein_coding	1.49857	0.34778	4.30895	1.64029e-05	0.00015515
CYP4F22	protein_coding	1.4979	0.301631	4.96601	6.83441e-07	1.04662e-05
HOXC13	protein_coding	1.49034	0.510126	2.92152	0.0034833	0.0139974
LY6G6C	protein_coding	1.48933	0.292758	5.08724	3.63307e-07	6.0189e-06
ANXA8L1	protein_coding	1.48829	0.288708	5.155	2.53632e-07	4.42806e-06
KLK5	protein_coding	1.48536	0.485713	3.0581	0.00222742	0.00965563
KRT16	protein_coding	1.47734	0.350137	4.21933	2.45033e-05	0.000219988
MSLN	protein_coding	1.47023	0.279972	5.25133	1.51003e-07	2.8334e-06
CGB2	protein_coding	1.46306	0.566477	2.58274	0.00980185	0.0325037
FOXH1	protein_coding	1.46231	0.269258	5.43088	5.60767e-08	1.20993e-06
VGLL1	protein_coding	1.45909	0.302366	4.82556	1.39611e-06	1.91849e-05
MYBPC1	protein_coding	1.45197	0.442277	3.28293	0.00102733	0.00510148
MAGEA10	protein_coding	1.44871	0.423787	3.41849	0.000629686	0.00338557
FEZF1	protein_coding	1.44857	0.413191	3.5058	0.000455238	0.00257923
KRT78	protein_coding	1.44074	0.305984	4.70854	2.49497e-06	3.14735e-05
CEACAM8	protein_coding	1.43924	0.384127	3.74679	0.000179113	0.00117399
AL691442.1	protein_coding	1.4328	0.364577	3.93004	8.49308e-05	0.000624972
ALDH3A1	protein_coding	1.43105	0.299121	4.78417	1.71695e-06	2.29409e-05
SFTA2	protein_coding	1.431	0.270638	5.28749	1.24006e-07	2.39032e-06
KRT9	protein_coding	1.43057	0.342205	4.18045	2.9093e-05	0.000254602
MIA	protein_coding	1.43035	0.307849	4.64628	3.37968e-06	4.03899e-05
RNF225	protein_coding	1.42607	0.375083	3.802	0.000143532	0.00097495
GSDMC	protein_coding	1.42345	0.268659	5.29834	1.16859e-07	2.27555e-06
TRIM29	protein_coding	1.41257	0.282324	5.00337	5.63361e-07	8.84384e-06
MROH9	protein_coding	1.41187	0.405534	3.48152	0.000498582	0.00278836
SLAMF9	protein_coding	1.41136	0.267985	5.26657	1.38993e-07	2.64184e-06
ALDH3B2	protein_coding	1.4095	0.287231	4.90719	9.23894e-07	1.34467e-05
CCDC166	protein_coding	1.40927	0.413639	3.40701	0.000656776	0.003505
GJB5	protein_coding	1.40117	0.29569	4.73865	2.15146e-06	2.76749e-05
AHNAK2	protein_coding	1.38414	0.211497	6.54449	5.9698e-11	2.9537e-09
SRMS	protein_coding	1.38185	0.242283	5.70344	1.17412e-08	3.13431e-07
KLK10	protein_coding	1.38058	0.27667	4.98998	6.03855e-07	9.41752e-06
REG4	protein_coding	1.38035	0.430824	3.20399	0.00135538	0.00640692
BMP4	protein_coding	1.37931	0.173749	7.93854	2.04576e-15	3.22477e-13
GAS2L2	protein_coding	1.37912	0.297493	4.6358	3.55561e-06	4.2136e-05
KCP	protein_coding	1.37862	0.231155	5.96405	2.46063e-09	7.94126e-08
LEMD1	protein_coding	1.37613	0.257442	5.3454	9.02186e-08	1.81805e-06
GFY	protein_coding	1.37292	0.408933	3.35731	0.000787054	0.00407599
TBX6	protein_coding	1.371	0.181149	7.56838	3.77899e-14	4.29039e-12
HOXC10	protein_coding	1.36744	0.405158	3.37507	0.000737961	0.00386637
WFDC12	protein_coding	1.36242	0.363801	3.74495	0.000180427	0.00118098
HOXC11	protein_coding	1.35808	0.397264	3.41858	0.000629485	0.00338497
SNCG	protein_coding	1.35691	0.259487	5.22921	1.70234e-07	3.15238e-06
HCAR1	protein_coding	1.35667	0.268893	5.04538	4.52632e-07	7.27013e-06
COX6B2	protein_coding	1.35513	0.282112	4.80353	1.55891e-06	2.10655e-05
ZIC2	protein_coding	1.35274	0.345179	3.91894	8.89378e-05	0.000650443
KLK8	protein_coding	1.35054	0.372959	3.62116	0.000293288	0.00177166
MYEOV	protein_coding	1.33903	0.258283	5.18436	2.1676e-07	3.86389e-06
EFNA3	protein_coding	1.33855	0.220117	6.08109	1.19367e-09	4.22011e-08
HAPLN1	protein_coding	1.33204	0.267387	4.9817	6.30296e-07	9.75807e-06
SLC13A5	protein_coding	1.32668	0.349584	3.79502	0.000147629	0.000997628
HOXA13	protein_coding	1.32646	0.40562	3.27022	0.00107465	0.00529237
AC004233.2	protein_coding	1.32568	0.365092	3.63107	0.000282243	0.00171581
TNS4	protein_coding	1.32324	0.301644	4.38677	1.15046e-05	0.000114437
TRIM54	protein_coding	1.32198	0.282897	4.673	2.96835e-06	3.62929e-05
STPG4	protein_coding	1.32197	0.258641	5.11124	3.20054e-07	5.3832e-06
NUTM1	protein_coding	1.30067	0.278477	4.67064	3.00268e-06	3.66538e-05
FOXL2NB	protein_coding	1.30023	0.493274	2.63592	0.00839096	0.0286178
FIBCD1	protein_coding	1.29978	0.32888	3.95213	7.746e-05	0.000577913
TBX4	protein_coding	1.29776	0.272193	4.76778	1.86263e-06	2.45267e-05
PIWIL1	protein_coding	1.29597	0.388246	3.33802	0.000843782	0.00432457
NXF3	protein_coding	1.29477	0.343681	3.76737	0.000164978	0.00109546
NPY4R2	protein_coding	1.2894	0.313643	4.11104	3.93876e-05	0.000327632
ELF5	protein_coding	1.28796	0.442809	2.90861	0.00363044	0.0144925
SPINK6	protein_coding	1.28702	0.43429	2.96351	0.0030415	0.0125107
TRIM7	protein_coding	1.28442	0.197819	6.49291	8.41943e-11	4.0147e-09
C19orf33	protein_coding	1.28201	0.225432	5.68691	1.29355e-08	3.41962e-07
AC025594.2	protein_coding	1.28055	0.201135	6.36665	1.93199e-10	8.37497e-09
KCNN4	protein_coding	1.28023	0.207646	6.16544	7.02852e-10	2.6709e-08
PITX1	protein_coding	1.27723	0.236586	5.39859	6.71676e-08	1.41015e-06
PRSS41	protein_coding	1.27663	0.403622	3.16294	0.00156183	0.00722472
FAM25A	protein_coding	1.2751	0.354459	3.59732	0.000321511	0.0019154
CALHM3	protein_coding	1.27108	0.34367	3.69854	0.000216845	0.00137614
EVPL	protein_coding	1.26476	0.196917	6.42279	1.338e-10	5.99772e-09
OR2B6	protein_coding	1.26434	0.327476	3.86086	0.000112987	0.000799055
LHB	protein_coding	1.26339	0.25497	4.95505	7.23099e-07	1.09591e-05
AMELX	protein_coding	1.25689	0.475424	2.64374	0.00819967	0.0280985
NOX1	protein_coding	1.25469	0.274982	4.5628	5.04748e-06	5.68822e-05
SULT1C2	protein_coding	1.24943	0.337702	3.6998	0.000215769	0.00137022
WNT11	protein_coding	1.24923	0.323341	3.8635	0.000111773	0.000792379
DMRT1	protein_coding	1.24885	0.484135	2.57955	0.00989291	0.0327648
PHGR1	protein_coding	1.2446	0.391879	3.17598	0.00149332	0.00695636
CATSPERD	protein_coding	1.24319	0.405507	3.06576	0.00217121	0.0094603
C16orf74	protein_coding	1.23785	0.253775	4.87774	1.07311e-06	1.52974e-05
HIST1H3H	protein_coding	1.23735	0.246459	5.0205	5.15362e-07	8.17104e-06
PTGES	protein_coding	1.23609	0.238466	5.18353	2.1773e-07	3.87576e-06
UGT1A10	protein_coding	1.2336	0.322514	3.82495	0.000130798	0.000903907
FOXD4L5	protein_coding	1.23071	0.419152	2.93619	0.00332269	0.0134522
CRABP2	protein_coding	1.22957	0.265134	4.63753	3.52602e-06	4.18114e-05
AL713999.1	protein_coding	1.22673	0.440299	2.78612	0.00533423	0.0198058
ZNF185	protein_coding	1.22609	0.168194	7.28973	3.10571e-13	2.95445e-11
SULT2B1	protein_coding	1.22521	0.226225	5.4159	6.09813e-08	1.29827e-06
SULT1E1	protein_coding	1.22181	0.355339	3.43844	0.000585085	0.00318619
ICAM5	protein_coding	1.21852	0.255725	4.76496	1.88892e-06	2.48386e-05
PGLYRP3	protein_coding	1.21758	0.431537	2.82149	0.00478004	0.0180664
CRX	protein_coding	1.21721	0.417867	2.91291	0.0035808	0.0143364
HSD11B2	protein_coding	1.21443	0.236349	5.13831	2.77222e-07	4.77436e-06
COL17A1	protein_coding	1.2137	0.30202	4.0186	5.8544e-05	0.000458861
AC008687.4	protein_coding	1.21171	0.265777	4.55912	5.13691e-06	5.77536e-05
PRB3	protein_coding	1.20737	0.284357	4.24596	2.17657e-05	0.0001985
KLHL30	protein_coding	1.20446	0.200613	6.00388	1.92651e-09	6.42401e-08
OR1J1	protein_coding	1.20319	0.404869	2.97179	0.00296067	0.012231
C8orf74	protein_coding	1.19869	0.267647	4.47863	7.51252e-06	8.00503e-05
KRT6C	protein_coding	1.19672	0.370952	3.22608	0.00125497	0.00602031
FGF19	protein_coding	1.19571	0.379799	3.14826	0.00164245	0.00752337
WNT10A	protein_coding	1.19257	0.24671	4.83389	1.33894e-06	1.8549e-05
TGM4	protein_coding	1.18816	0.263515	4.5089	6.51652e-06	7.07273e-05
C20orf85	protein_coding	1.18806	0.419032	2.83525	0.00457894	0.0174367
CAPZA3	protein_coding	1.18227	0.395639	2.98826	0.0028057	0.011678
PLA2G2A	protein_coding	1.18174	0.412961	2.86161	0.00421489	0.0163317
XDH	protein_coding	1.17768	0.234738	5.01701	5.24828e-07	8.30171e-06
KRT76	protein_coding	1.17764	0.465405	2.53035	0.0113947	0.0368182
CATSPER1	protein_coding	1.17222	0.20058	5.84416	5.09124e-09	1.49858e-07
UGT1A9	protein_coding	1.17221	0.293681	3.99146	6.56691e-05	0.000504142
PLAT	protein_coding	1.16971	0.21632	5.4073	6.3981e-08	1.35518e-06
MROH6	protein_coding	1.16435	0.202634	5.74605	9.13532e-09	2.50529e-07
IHH	protein_coding	1.16129	0.295017	3.93635	8.27315e-05	0.000611502
AQP6	protein_coding	1.16093	0.290646	3.9943	6.48856e-05	0.000499768
HIST1H2AG	protein_coding	1.16092	0.197165	5.88809	3.90693e-09	1.19326e-07
IFITM10	protein_coding	1.16086	0.209727	5.53509	3.11076e-08	7.26676e-07
PERM1	protein_coding	1.15807	0.198422	5.83641	5.33363e-09	1.5663e-07
DPCR1	protein_coding	1.15584	0.405217	2.85239	0.00433913	0.0167349
CTSV	protein_coding	1.15568	0.214899	5.37777	7.54127e-08	1.56007e-06
NIPAL4	protein_coding	1.15082	0.286068	4.02291	5.74846e-05	0.000452417
DHRS9	protein_coding	1.15009	0.347018	3.31421	0.000919038	0.00465091
MSX2	protein_coding	1.14831	0.21091	5.44455	5.19373e-08	1.13344e-06
TMEM105	protein_coding	1.14454	0.214626	5.33274	9.67406e-08	1.93314e-06
OASL	protein_coding	1.1444	0.22415	5.10551	3.29896e-07	5.53167e-06
CAPN8	protein_coding	1.14084	0.250694	4.55072	5.34637e-06	5.97037e-05
ZNF114	protein_coding	1.13967	0.211211	5.3959	6.81812e-08	1.42907e-06
LDHC	protein_coding	1.13957	0.392323	2.90468	0.00367631	0.0146373
PTK6	protein_coding	1.13922	0.205373	5.54707	2.9049e-08	6.83188e-07
PSAPL1	protein_coding	1.13675	0.463395	2.45308	0.0141638	0.0437922
KRT17	protein_coding	1.1356	0.306292	3.70758	0.000209252	0.00133596
BEAN1	protein_coding	1.13241	0.217297	5.21136	1.87458e-07	3.42152e-06
HMGA2	protein_coding	1.13178	0.315497	3.58728	0.000334148	0.00198119
AC002996.1	protein_coding	1.13108	0.334975	3.3766	0.000733867	0.00384914
DAW1	protein_coding	1.13107	0.336339	3.36288	0.000771335	0.00400601
AKAP14	protein_coding	1.12525	0.327255	3.43846	0.000585022	0.00318619
FOXL1	protein_coding	1.12372	0.208747	5.38316	7.31905e-08	1.51987e-06
SLC4A11	protein_coding	1.12254	0.18904	5.9381	2.88351e-09	9.0982e-08
ASPG	protein_coding	1.11894	0.240357	4.65534	3.23448e-06	3.88617e-05
GJC2	protein_coding	1.11404	0.228838	4.86826	1.12583e-06	1.59476e-05
PLEKHN1	protein_coding	1.11322	0.200939	5.5401	3.02301e-08	7.09217e-07
CST6	protein_coding	1.11002	0.32034	3.46514	0.000529953	0.0029337
PRSS21	protein_coding	1.10723	0.357578	3.09646	0.00195843	0.00869814
TERT	protein_coding	1.10416	0.329776	3.34821	0.00081335	0.00418603
SH3TC2	protein_coding	1.10388	0.181089	6.09581	1.08888e-09	3.88564e-08
LGALS9B	protein_coding	1.10188	0.345719	3.18723	0.00143644	0.00672426
UPK2	protein_coding	1.10167	0.377787	2.9161	0.00354432	0.0142172
ALS2CL	protein_coding	1.1014	0.172534	6.38366	1.72901e-10	7.60745e-09
SPRR1A	protein_coding	1.10128	0.425605	2.58756	0.00966585	0.0321463
S100A7	protein_coding	1.10031	0.380973	2.88817	0.00387495	0.0152752
PLA2G2F	protein_coding	1.0986	0.434679	2.52738	0.0114916	0.0370496
TAC3	protein_coding	1.09613	0.300051	3.65313	0.000259065	0.00159937
PROM2	protein_coding	1.09608	0.234931	4.66555	3.07788e-06	3.73923e-05
MAJIN	protein_coding	1.09398	0.313182	3.49313	0.0004774	0.00268723
MMP28	protein_coding	1.09306	0.189391	5.77147	7.85808e-09	2.2009e-07
TMPRSS11D	protein_coding	1.08982	0.392859	2.77407	0.00553597	0.0204197
GPRC5A	protein_coding	1.08829	0.228901	4.75443	1.99006e-06	2.59006e-05
HIST2H2AB	protein_coding	1.0842	0.307635	3.52431	0.000424587	0.0024356
NMU	protein_coding	1.08285	0.283684	3.8171	0.000135029	0.000927263
NANOG	protein_coding	1.08235	0.297028	3.64393	0.000268505	0.00164752
GPR78	protein_coding	1.07846	0.234112	4.60658	4.09353e-06	4.76085e-05
RP1	protein_coding	1.07722	0.30783	3.4994	0.00046631	0.00263141
IGSF9	protein_coding	1.07658	0.213814	5.03511	4.77569e-07	7.60978e-06
PDE4C	protein_coding	1.07618	0.237714	4.52719	5.97731e-06	6.55597e-05
PPP1R1B	protein_coding	1.07443	0.282337	3.80549	0.000141524	0.000963882
TP63	protein_coding	1.07345	0.301071	3.56544	0.000363247	0.0021351
ALPPL2	protein_coding	1.0686	0.416077	2.56827	0.0102207	0.0336401
HIST1H2AM	protein_coding	1.06577	0.243939	4.36902	1.24805e-05	0.000122712
IL1RAPL2	protein_coding	1.06486	0.274469	3.87973	0.000104574	0.000748718
BTBD16	protein_coding	1.06455	0.251984	4.22469	2.39274e-05	0.000215172
PDCL2	protein_coding	1.06409	0.428761	2.48177	0.0130731	0.0411131
ZIC5	protein_coding	1.06405	0.402461	2.64386	0.00819673	0.028096
WNT7A	protein_coding	1.06365	0.307524	3.45874	0.000542713	0.00299002
ABO	protein_coding	1.06282	0.211054	5.03578	4.75908e-07	7.58648e-06
LY6E	protein_coding	1.06085	0.176967	5.99464	2.03939e-09	6.73076e-08
CNGB1	protein_coding	1.06084	0.26136	4.05892	4.93005e-05	0.000397772
HIST2H2BF	protein_coding	1.05853	0.25383	4.17023	3.04294e-05	0.000264597
SH2D5	protein_coding	1.05778	0.238462	4.43583	9.17177e-06	9.43061e-05
S100P	protein_coding	1.05756	0.294009	3.59703	0.000321869	0.00191699
HIST1H2AI	protein_coding	1.05718	0.275591	3.83605	0.00012503	0.000870824
METTL11B	protein_coding	1.05645	0.319715	3.30434	0.000951987	0.00478716
RAET1L	protein_coding	1.05585	0.297453	3.54964	0.000385752	0.00224695
DNAH3	protein_coding	1.0558	0.201505	5.23959	1.60936e-07	3.00206e-06
ALG1L	protein_coding	1.05192	0.247779	4.24539	2.18211e-05	0.000198855
GRB7	protein_coding	1.0492	0.168458	6.22825	4.71671e-10	1.86842e-08
SLC39A2	protein_coding	1.04888	0.352147	2.97853	0.00289632	0.0120054
GALNT9	protein_coding	1.04853	0.275466	3.80638	0.000141014	0.000960754
IQANK1	protein_coding	1.04654	0.16473	6.35304	2.11098e-10	9.05823e-09
TP73	protein_coding	1.04579	0.175607	5.95528	2.59619e-09	8.28068e-08
AC106782.1	protein_coding	1.04481	0.193628	5.39595	6.81622e-08	1.42907e-06
KRT7	protein_coding	1.04435	0.229263	4.55524	5.23266e-06	5.87089e-05
POU2F3	protein_coding	1.04424	0.25295	4.12824	3.65548e-05	0.000308508
MUC17	protein_coding	1.04342	0.426178	2.44831	0.0143527	0.0442471
RNF223	protein_coding	1.04333	0.233152	4.47491	7.64448e-06	8.11166e-05
NFE2	protein_coding	1.04098	0.248182	4.19443	2.73556e-05	0.000241615
VGLL2	protein_coding	1.04051	0.41174	2.52711	0.0115007	0.0370726
DNAJB1	protein_coding	1.04029	0.214502	4.84981	1.23579e-06	1.73125e-05
ADAP1	protein_coding	1.0373	0.20631	5.02788	4.9594e-07	7.88277e-06
C2orf82	protein_coding	1.03715	0.175544	5.90819	3.45889e-09	1.0713e-07
MUC4	protein_coding	1.03378	0.303811	3.40272	0.000667196	0.00355319
PIK3C2G	protein_coding	1.03351	0.332635	3.10703	0.00188976	0.00844533
ZSCAN4	protein_coding	1.0319	0.293646	3.51411	0.000441222	0.00251514
ADORA2B	protein_coding	1.02675	0.158928	6.46048	1.04371e-10	4.81434e-09
SLC16A5	protein_coding	1.02652	0.177971	5.7679	8.02641e-09	2.23982e-07
GPR1	protein_coding	1.02613	0.257421	3.98618	6.71466e-05	0.000513212
CREG2	protein_coding	1.02424	0.209626	4.88605	1.02877e-06	1.47425e-05
CITED1	protein_coding	1.02399	0.293714	3.48634	0.000489686	0.00274464
GJB3	protein_coding	1.02261	0.227614	4.49275	7.03086e-06	7.55937e-05
LHX9	protein_coding	1.02245	0.29656	3.4477	0.000565382	0.00309479
CACNG6	protein_coding	1.0212	0.404836	2.5225	0.0116525	0.0374627
FERMT1	protein_coding	1.01956	0.183492	5.55642	2.75358e-08	6.57328e-07
NECTIN4	protein_coding	1.01703	0.227023	4.47986	7.46921e-06	7.97002e-05
LAMA3	protein_coding	1.01687	0.198282	5.12843	2.92166e-07	4.99339e-06
TMPRSS4	protein_coding	1.01593	0.244643	4.15272	3.28541e-05	0.000282909
CCDC190	protein_coding	1.01563	0.400782	2.53413	0.0112727	0.0364982
CDA	protein_coding	1.0151	0.235191	4.31607	1.58834e-05	0.000151174
OVCH2	protein_coding	1.01371	0.384853	2.63401	0.00843824	0.0287482
NLRP2	protein_coding	1.01327	0.345144	2.93578	0.00332712	0.0134649
KRTAP5-8	protein_coding	1.01253	0.271757	3.72585	0.000194659	0.00125774
LPCAT4	protein_coding	1.01193	0.149973	6.7474	1.50519e-11	8.9021e-10
NR5A1	protein_coding	1.01156	0.316909	3.19194	0.00141319	0.00663006
ITGB4	protein_coding	1.01151	0.184658	5.47776	4.30733e-08	9.62013e-07
MMP20	protein_coding	1.01141	0.366903	2.75661	0.0058404	0.021327
PLA2G4D	protein_coding	1.01036	0.208276	4.85108	1.22792e-06	1.72149e-05
SERPINB5	protein_coding	1.00831	0.262609	3.8396	0.000123233	0.000860195
MYL2	protein_coding	1.00695	0.372328	2.70448	0.0068411	0.0242175
RAPGEFL1	protein_coding	1.00562	0.206136	4.87845	1.06925e-06	1.52481e-05
UGT1A7	protein_coding	1.00431	0.290241	3.46028	0.000539619	0.00297512
LYNX1	protein_coding	1.00396	0.209837	4.78447	1.71442e-06	2.29151e-05
ANKFN1	protein_coding	1.00279	0.247719	4.0481	5.16346e-05	0.000413196
AXDND1	protein_coding	1.00217	0.338078	2.96432	0.00303355	0.0124847
CFAP73	protein_coding	1.00057	0.229367	4.36233	1.28687e-05	0.000125808
CD1E	protein_coding	-1.0006	0.230917	-4.33316	1.46986e-05	0.000141201
HSPB3	protein_coding	-1.00081	0.341435	-2.93118	0.00337681	0.0136341
ACE2	protein_coding	-1.00168	0.281201	-3.56214	0.000367839	0.00215792
GMNC	protein_coding	-1.00183	0.34674	-2.88929	0.00386107	0.0152331
FCRL5	protein_coding	-1.00354	0.30534	-3.28662	0.00101397	0.00504565
HEATR9	protein_coding	-1.00354	0.225353	-4.4532	8.45998e-06	8.82947e-05
SRPX	protein_coding	-1.0037	0.175589	-5.71618	1.08948e-08	2.93299e-07
FGF13	protein_coding	-1.00431	0.212706	-4.72156	2.34044e-06	2.97901e-05
IGFBP2	protein_coding	-1.00549	0.228864	-4.39338	1.116e-05	0.00011165
MAN1A1	protein_coding	-1.0056	0.145271	-6.92221	4.44643e-12	2.98099e-10
RFPL3	protein_coding	-1.00596	0.287792	-3.49544	0.000473281	0.00266641
ABCB4	protein_coding	-1.00643	0.16653	-6.04353	1.5078e-09	5.19327e-08
VIP	protein_coding	-1.00643	0.336693	-2.98916	0.00279748	0.0116553
ZMAT1	protein_coding	-1.00672	0.170273	-5.91238	3.37197e-09	1.04833e-07
SLC25A27	protein_coding	-1.00678	0.177064	-5.68597	1.3007e-08	3.43377e-07
DCT	protein_coding	-1.00703	0.211681	-4.75729	1.9621e-06	2.5633e-05
KCNT2	protein_coding	-1.00719	0.178794	-5.63323	1.76861e-08	4.47395e-07
CCDC110	protein_coding	-1.00773	0.185278	-5.439	5.35815e-08	1.16333e-06
ASPA	protein_coding	-1.00853	0.178012	-5.66552	1.46576e-08	3.79853e-07
ART4	protein_coding	-1.00924	0.213694	-4.72281	2.32613e-06	2.96376e-05
PRKAR2B	protein_coding	-1.00951	0.155856	-6.4772	9.34434e-11	4.35768e-09
KIF6	protein_coding	-1.00967	0.185374	-5.44665	5.1327e-08	1.12333e-06
AGTR1	protein_coding	-1.01251	0.192718	-5.25388	1.48931e-07	2.80418e-06
RAB3B	protein_coding	-1.01286	0.19758	-5.12633	2.95452e-07	5.03827e-06
PGM5	protein_coding	-1.01321	0.209223	-4.84275	1.28057e-06	1.78415e-05
LIFR	protein_coding	-1.0135	0.151631	-6.68399	2.32522e-11	1.29489e-09
FAM13C	protein_coding	-1.01409	0.167656	-6.04866	1.46051e-09	5.06211e-08
DACH1	protein_coding	-1.01488	0.220964	-4.59295	4.37017e-06	5.03652e-05
ESR1	protein_coding	-1.01491	0.170736	-5.94432	2.77606e-09	8.79553e-08
ATP6V0E2	protein_coding	-1.01518	0.171977	-5.90298	3.56992e-09	1.10179e-07
STAT4	protein_coding	-1.01639	0.139896	-7.26533	3.72127e-13	3.44552e-11
ENPP6	protein_coding	-1.01641	0.202281	-5.02475	5.041e-07	8.00246e-06
HOGA1	protein_coding	-1.0169	0.267937	-3.7953	0.000147467	0.000996709
P2RX5-TAX1BP3	protein_coding	-1.01728	0.144016	-7.06364	1.622e-12	1.2204e-10
SOCS2	protein_coding	-1.01786	0.113888	-8.9374	3.98428e-19	1.78783e-16
PTPRC	protein_coding	-1.01907	0.213568	-4.77165	1.82719e-06	2.4135e-05
MROH8	protein_coding	-1.01912	0.141408	-7.20696	5.72165e-13	4.93809e-11
RGN	protein_coding	-1.0194	0.203385	-5.01216	5.38231e-07	8.48776e-06
TUB	protein_coding	-1.02041	0.154755	-6.59371	4.28982e-11	2.23863e-09
POTEJ	protein_coding	-1.02051	0.291266	-3.50369	0.000458857	0.00259704
IKZF3	protein_coding	-1.02136	0.221168	-4.61801	3.8744e-06	4.53921e-05
LRCOL1	protein_coding	-1.02163	0.230185	-4.4383	9.06705e-06	9.35066e-05
BCL11A	protein_coding	-1.02169	0.199863	-5.11197	3.18812e-07	5.36704e-06
PGR	protein_coding	-1.02184	0.199394	-5.12474	2.9795e-07	5.07632e-06
RFX2	protein_coding	-1.02225	0.148701	-6.87451	6.22014e-12	4.04224e-10
KCNJ8	protein_coding	-1.02225	0.164118	-6.22877	4.70124e-10	1.86422e-08
LDB3	protein_coding	-1.02291	0.174282	-5.86926	4.37735e-09	1.30967e-07
FLG	protein_coding	-1.02304	0.248632	-4.11466	3.87748e-05	0.00032338
GLTPD2	protein_coding	-1.02313	0.190086	-5.38246	7.34751e-08	1.52412e-06
KRT2	protein_coding	-1.02326	0.271636	-3.76701	0.000165214	0.00109645
CHRNB3	protein_coding	-1.02416	0.409974	-2.49811	0.0124856	0.0396049
TSPYL2	protein_coding	-1.02429	0.13777	-7.43476	1.04756e-13	1.08591e-11
ALDH1A2	protein_coding	-1.02457	0.279687	-3.66328	0.000249004	0.00154552
GPRASP2	protein_coding	-1.02534	0.144065	-7.11723	1.1012e-12	8.66135e-11
KRT1	protein_coding	-1.02548	0.340296	-3.01351	0.00258247	0.0108975
ETV3L	protein_coding	-1.02551	0.387214	-2.64844	0.00808651	0.0278363
SLC22A10	protein_coding	-1.0258	0.407337	-2.5183	0.0117923	0.0378135
ARMC4	protein_coding	-1.02583	0.278622	-3.68181	0.000231584	0.00145659
NTRK2	protein_coding	-1.02673	0.219258	-4.68275	2.83056e-06	3.49668e-05
DTHD1	protein_coding	-1.02702	0.251942	-4.0764	4.57377e-05	0.000372971
ADAMTS19	protein_coding	-1.02818	0.370693	-2.77368	0.00554267	0.0204345
ANKLE1	protein_coding	-1.02873	0.171267	-6.00658	1.89474e-09	6.32911e-08
MYOT	protein_coding	-1.02877	0.220438	-4.66693	3.05726e-06	3.71774e-05
ERICH4	protein_coding	-1.02889	0.33259	-3.09356	0.00197771	0.0087705
CBFA2T3	protein_coding	-1.02947	0.198263	-5.19245	2.07539e-07	3.73796e-06
ASIC2	protein_coding	-1.03005	0.209681	-4.91247	8.99367e-07	1.31399e-05
CBS	protein_coding	-1.03024	0.277131	-3.71754	0.000201172	0.00129346
FAM189A1	protein_coding	-1.03028	0.213626	-4.82282	1.4154e-06	1.94081e-05
TRIM55	protein_coding	-1.03086	0.249588	-4.13025	3.62363e-05	0.000306362
GTSF1L	protein_coding	-1.03107	0.349397	-2.95099	0.00316758	0.0129372
CR1	protein_coding	-1.03204	0.259345	-3.97942	6.90844e-05	0.000524868
PROX1	protein_coding	-1.03208	0.219383	-4.70447	2.54526e-06	3.20125e-05
CLIP3	protein_coding	-1.03225	0.152542	-6.76701	1.31469e-11	7.8731e-10
PCDHB5	protein_coding	-1.03266	0.191799	-5.38406	7.28254e-08	1.51476e-06
ODF3L1	protein_coding	-1.03277	0.201772	-5.11848	3.08004e-07	5.21965e-06
CRYAB	protein_coding	-1.03319	0.176759	-5.84517	5.0606e-09	1.49071e-07
OLFM3	protein_coding	-1.03369	0.39524	-2.61535	0.00891362	0.0301069
IGFALS	protein_coding	-1.03388	0.285481	-3.62152	0.000292875	0.00177001
TRIM71	protein_coding	-1.03403	0.284439	-3.63535	0.000277604	0.00169418
HOXD1	protein_coding	-1.03457	0.232757	-4.44485	8.79529e-06	9.12963e-05
CEP126	protein_coding	-1.03554	0.173103	-5.98223	2.20098e-09	7.18842e-08
EOMES	protein_coding	-1.03558	0.226185	-4.57845	4.68428e-06	5.33725e-05
TMEM27	protein_coding	-1.03632	0.215374	-4.81175	1.49616e-06	2.03691e-05
B3GALT2	protein_coding	-1.03648	0.250117	-4.144	3.41301e-05	0.000291397
MUM1L1	protein_coding	-1.03693	0.249569	-4.15489	3.25451e-05	0.000280501
HGNC:18790	protein_coding	-1.03723	0.234596	-4.42134	9.80893e-06	9.9995e-05
ADAMTS8	protein_coding	-1.03844	0.258367	-4.01925	5.83843e-05	0.000458174
C2CD4B	protein_coding	-1.03984	0.248492	-4.18461	2.85652e-05	0.000250783
ACAP1	protein_coding	-1.0408	0.170828	-6.09271	1.11017e-09	3.94499e-08
KLHL34	protein_coding	-1.04086	0.241392	-4.31192	1.61845e-05	0.000153433
GHSR	protein_coding	-1.0412	0.357711	-2.91072	0.00360592	0.0144142
MLXIPL	protein_coding	-1.04152	0.264941	-3.93115	8.45399e-05	0.000622336
AC097372.1	protein_coding	-1.04364	0.270476	-3.85852	0.000114074	0.000805103
TRO	protein_coding	-1.04366	0.143859	-7.25472	4.02482e-13	3.69963e-11
BTNL2	protein_coding	-1.04434	0.393573	-2.65349	0.00796648	0.0274945
C1QTNF9	protein_coding	-1.04455	0.20629	-5.06348	4.11679e-07	6.71986e-06
KCNIP1	protein_coding	-1.04456	0.226688	-4.60791	4.06738e-06	4.73332e-05
LMO3	protein_coding	-1.04584	0.22274	-4.69534	2.66161e-06	3.3224e-05
MMP24	protein_coding	-1.04603	0.179278	-5.83471	5.3884e-09	1.57995e-07
CCDC62	protein_coding	-1.04694	0.146261	-7.15803	8.18429e-13	6.77237e-11
TPH2	protein_coding	-1.04701	0.32766	-3.19541	0.00139631	0.0065646
SRCIN1	protein_coding	-1.04708	0.202969	-5.15882	2.48509e-07	4.34657e-06
SLC16A11	protein_coding	-1.04721	0.246693	-4.24501	2.18583e-05	0.000199052
MPZ	protein_coding	-1.04914	0.157677	-6.65375	2.85727e-11	1.56604e-09
SLC10A4	protein_coding	-1.04951	0.22172	-4.73348	2.20707e-06	2.83288e-05
KRTAP1-1	protein_coding	-1.04975	0.421933	-2.48796	0.012848	0.040552
CSRNP3	protein_coding	-1.05006	0.189238	-5.54886	2.87546e-08	6.771e-07
LRRC63	protein_coding	-1.0502	0.243609	-4.311	1.62518e-05	0.000153988
USH2A	protein_coding	-1.05053	0.19025	-5.52182	3.35504e-08	7.76136e-07
KLRB1	protein_coding	-1.05159	0.190616	-5.5168	3.45223e-08	7.95243e-07
ADCY5	protein_coding	-1.05229	0.185199	-5.68193	1.33183e-08	3.50317e-07
CD5	protein_coding	-1.0526	0.198609	-5.29984	1.15905e-07	2.25929e-06
C14orf178	protein_coding	-1.05263	0.2923	-3.60121	0.000316743	0.00189208
SSTR1	protein_coding	-1.05268	0.282476	-3.72662	0.000194068	0.00125477
BHLHE22	protein_coding	-1.05314	0.187837	-5.60667	2.06259e-08	5.12249e-07
CCDC181	protein_coding	-1.05374	0.196823	-5.35374	8.6153e-08	1.74989e-06
VSX2	protein_coding	-1.05408	0.399298	-2.63984	0.0082945	0.0283471
LRP2BP	protein_coding	-1.05447	0.153581	-6.86588	6.60845e-12	4.26553e-10
MEP1A	protein_coding	-1.05462	0.382822	-2.75485	0.0058719	0.0214124
CHRNA3	protein_coding	-1.05595	0.2487	-4.24589	2.17727e-05	0.000198509
C2orf73	protein_coding	-1.05699	0.233925	-4.51852	6.22743e-06	6.81267e-05
KEL	protein_coding	-1.05786	0.230533	-4.58875	4.45902e-06	5.12345e-05
RASA4B	protein_coding	-1.05882	0.253895	-4.1703	3.04201e-05	0.000264577
SAMD3	protein_coding	-1.05938	0.172117	-6.15499	7.50816e-10	2.83859e-08
NRG1	protein_coding	-1.06015	0.215091	-4.92887	8.27064e-07	1.22382e-05
DLG4	protein_coding	-1.06036	0.159033	-6.66758	2.60049e-11	1.43354e-09
SLC35F1	protein_coding	-1.06041	0.177106	-5.98745	2.13153e-09	6.99755e-08
ADAMTSL3	protein_coding	-1.06087	0.199713	-5.31199	1.08433e-07	2.12997e-06
OTUD7A	protein_coding	-1.06112	0.131262	-8.08401	6.2673e-16	1.10685e-13
WDR63	protein_coding	-1.06225	0.218458	-4.86249	1.15919e-06	1.63716e-05
ZBTB16	protein_coding	-1.06254	0.241795	-4.39438	1.11088e-05	0.000111254
TENM2	protein_coding	-1.06277	0.217769	-4.88025	1.0595e-06	1.51374e-05
DMGDH	protein_coding	-1.06282	0.153846	-6.90836	4.90295e-12	3.2641e-10
SLC2A2	protein_coding	-1.06342	0.322843	-3.29393	0.000987976	0.00493496
LIPJ	protein_coding	-1.06393	0.234347	-4.53997	5.6261e-06	6.2371e-05
ZBTB8B	protein_coding	-1.06393	0.243789	-4.36415	1.27616e-05	0.000124889
FAM92B	protein_coding	-1.06421	0.289564	-3.6752	0.000237661	0.00148868
CELF2	protein_coding	-1.06497	0.158457	-6.72085	1.8067e-11	1.04109e-09
MAT1A	protein_coding	-1.06514	0.313709	-3.39531	0.000685498	0.00363695
ANPEP	protein_coding	-1.06524	0.285595	-3.7299	0.000191552	0.00124208
ATP4A	protein_coding	-1.06568	0.359397	-2.96518	0.0030251	0.0124572
HMCN2	protein_coding	-1.06568	0.19256	-5.53427	3.12534e-08	7.29636e-07
DIRAS3	protein_coding	-1.066	0.198115	-5.38071	7.4194e-08	1.53736e-06
EPX	protein_coding	-1.06682	0.212252	-5.02621	5.00269e-07	7.94495e-06
SPINK9	protein_coding	-1.06706	0.273989	-3.89453	9.83905e-05	0.000710046
CLEC3B	protein_coding	-1.06748	0.165047	-6.46772	9.94913e-11	4.61714e-09
CYP2C8	protein_coding	-1.06751	0.244426	-4.36741	1.25729e-05	0.00012339
CALCA	protein_coding	-1.06823	0.345515	-3.0917	0.00199014	0.00881637
CCDC178	protein_coding	-1.06823	0.224449	-4.75933	1.94233e-06	2.54269e-05
ADD2	protein_coding	-1.06878	0.198819	-5.37566	7.63041e-08	1.57765e-06
NUCB2	protein_coding	-1.06884	0.150851	-7.08539	1.38654e-12	1.07944e-10
GPR135	protein_coding	-1.06897	0.155201	-6.88769	5.67058e-12	3.6977e-10
ANGPTL3	protein_coding	-1.06942	0.258162	-4.14244	3.4363e-05	0.000292861
BFSP2	protein_coding	-1.06959	0.270414	-3.95538	7.64123e-05	0.000570766
ADAMTS1	protein_coding	-1.07029	0.175433	-6.10084	1.05515e-09	3.78653e-08
EDN3	protein_coding	-1.07042	0.283612	-3.77426	0.000160486	0.00107123
STK33	protein_coding	-1.07056	0.17736	-6.03606	1.57926e-09	5.39028e-08
CHRNA4	protein_coding	-1.07064	0.317946	-3.36737	0.000758875	0.00395746
ALLC	protein_coding	-1.07131	0.234021	-4.57784	4.69792e-06	5.3496e-05
MARK1	protein_coding	-1.07136	0.140964	-7.60025	2.95548e-14	3.49886e-12
HCN2	protein_coding	-1.07139	0.226572	-4.72871	2.2595e-06	2.89142e-05
C1QL4	protein_coding	-1.07143	0.288751	-3.71059	0.000206778	0.00132317
PEBP4	protein_coding	-1.0725	0.236897	-4.52725	5.97549e-06	6.55585e-05
NTS	protein_coding	-1.07269	0.350981	-3.05627	0.00224108	0.009706
CD27	protein_coding	-1.07281	0.228378	-4.69754	2.63311e-06	3.29113e-05
FKBP11	protein_coding	-1.07283	0.17013	-6.30595	2.86436e-10	1.19679e-08
FIGNL2	protein_coding	-1.07354	0.199068	-5.39283	6.93558e-08	1.45073e-06
ASXL3	protein_coding	-1.07434	0.166771	-6.44197	1.1793e-10	5.34918e-09
SEC14L5	protein_coding	-1.07441	0.21981	-4.8879	1.01919e-06	1.46258e-05
GIMAP7	protein_coding	-1.07454	0.164692	-6.52454	6.82092e-11	3.32712e-09
CCL2	protein_coding	-1.07682	0.204705	-5.26035	1.43781e-07	2.72064e-06
GAL3ST3	protein_coding	-1.07713	0.3401	-3.16709	0.0015397	0.00713843
DMRT3	protein_coding	-1.07714	0.364434	-2.95565	0.00312014	0.0127736
ZNF781	protein_coding	-1.07722	0.146866	-7.33475	2.22142e-13	2.16728e-11
SFTPA1	protein_coding	-1.07848	0.329187	-3.2762	0.00105214	0.00520415
DNTT	protein_coding	-1.07856	0.394735	-2.73236	0.00628819	0.0226234
CALCB	protein_coding	-1.07915	0.257333	-4.1936	2.74558e-05	0.000242312
CCR6	protein_coding	-1.07983	0.240504	-4.48987	7.12669e-06	7.64516e-05
PARP15	protein_coding	-1.07989	0.222538	-4.85263	1.21835e-06	1.71058e-05
SIT1	protein_coding	-1.07995	0.237296	-4.55109	5.33691e-06	5.9673e-05
TOX	protein_coding	-1.08047	0.213187	-5.06819	4.01613e-07	6.57244e-06
MYRFL	protein_coding	-1.08054	0.279167	-3.87059	0.000108572	0.000773428
KCNF1	protein_coding	-1.08085	0.208393	-5.1866	2.14169e-07	3.82665e-06
CAVIN2	protein_coding	-1.08113	0.164436	-6.57474	4.87384e-11	2.48227e-09
KCNJ16	protein_coding	-1.08115	0.33503	-3.22702	0.00125087	0.00600666
BRINP3	protein_coding	-1.08146	0.28295	-3.82208	0.000132331	0.000912353
LRRC37A3	protein_coding	-1.0821	0.161992	-6.67992	2.39069e-11	1.32941e-09
JPH4	protein_coding	-1.0821	0.190073	-5.69308	1.24765e-08	3.31436e-07
TDRD10	protein_coding	-1.08332	0.147421	-7.34843	2.00544e-13	1.97169e-11
PCDHA3	protein_coding	-1.08365	0.204458	-5.30011	1.15735e-07	2.25828e-06
MS4A8	protein_coding	-1.0844	0.302032	-3.59036	0.000330224	0.00196155
CLEC4G	protein_coding	-1.08514	0.27213	-3.98756	6.67565e-05	0.000510333
TEX38	protein_coding	-1.08532	0.236639	-4.58637	4.51011e-06	5.1728e-05
BRINP1	protein_coding	-1.08538	0.199335	-5.44503	5.17952e-08	1.13099e-06
FOXI2	protein_coding	-1.08618	0.230974	-4.7026	2.56874e-06	3.22653e-05
TLL1	protein_coding	-1.08648	0.188568	-5.76174	8.32501e-09	2.31637e-07
NLRP1	protein_coding	-1.08687	0.173582	-6.26143	3.81462e-10	1.54476e-08
KCNN2	protein_coding	-1.08706	0.197714	-5.49813	3.83844e-08	8.73657e-07
TTC36	protein_coding	-1.08768	0.202557	-5.36971	7.88621e-08	1.6279e-06
SLC8A1	protein_coding	-1.08797	0.178143	-6.10732	1.01321e-09	3.66011e-08
MPPED2	protein_coding	-1.08819	0.173924	-6.2567	3.93199e-10	1.58723e-08
KRTAP5-5	protein_coding	-1.08852	0.387795	-2.80696	0.00500116	0.0187553
ATP2B2	protein_coding	-1.08923	0.211521	-5.14949	2.612e-07	4.54355e-06
STEAP1B	protein_coding	-1.08963	0.214464	-5.0807	3.76039e-07	6.19913e-06
ZNF835	protein_coding	-1.09022	0.157412	-6.92587	4.33311e-12	2.92041e-10
NCALD	protein_coding	-1.09042	0.134291	-8.11984	4.66789e-16	8.35991e-14
44075	protein_coding	-1.09055	0.184247	-5.91896	3.23975e-09	1.01135e-07
ART3	protein_coding	-1.0908	0.328803	-3.31749	0.000908311	0.00460824
ABCC9	protein_coding	-1.09112	0.184304	-5.92022	3.21515e-09	1.00614e-07
GZMM	protein_coding	-1.09133	0.210772	-5.1778	2.24518e-07	3.98358e-06
WNT9B	protein_coding	-1.09159	0.221358	-4.93132	8.16747e-07	1.21184e-05
CCDC158	protein_coding	-1.09169	0.168288	-6.48701	8.75558e-11	4.13878e-09
NAP1L3	protein_coding	-1.09206	0.172607	-6.32686	2.50202e-10	1.05231e-08
SLC26A4	protein_coding	-1.09227	0.1899	-5.75182	8.82877e-09	2.4395e-07
MGARP	protein_coding	-1.09279	0.177465	-6.15775	7.37838e-10	2.79229e-08
EDARADD	protein_coding	-1.09325	0.22683	-4.8197	1.43775e-06	1.96862e-05
RPH3AL	protein_coding	-1.09347	0.170217	-6.42398	1.32761e-10	5.96516e-09
ABCB5	protein_coding	-1.09363	0.231433	-4.72545	2.29608e-06	2.93134e-05
PCDHA8	protein_coding	-1.09448	0.319986	-3.4204	0.000625294	0.0033667
NXPH4	protein_coding	-1.09492	0.242777	-4.50997	6.48369e-06	7.05055e-05
LOR	protein_coding	-1.09566	0.387221	-2.82954	0.00466143	0.0176868
RERGL	protein_coding	-1.09611	0.255502	-4.29003	1.78651e-05	0.000167116
ATP8A1	protein_coding	-1.09629	0.183877	-5.96205	2.49093e-09	8.03226e-08
PDE1C	protein_coding	-1.09666	0.160855	-6.81771	9.25036e-12	5.80384e-10
CA8	protein_coding	-1.09673	0.217855	-5.03421	4.79819e-07	7.64245e-06
GFRA2	protein_coding	-1.09684	0.182888	-5.9973	2.00621e-09	6.64332e-08
ITM2A	protein_coding	-1.09707	0.179939	-6.09693	1.08126e-09	3.86568e-08
GRIK3	protein_coding	-1.09732	0.233575	-4.69792	2.62825e-06	3.28721e-05
TSPEAR	protein_coding	-1.09878	0.28042	-3.91834	8.91598e-05	0.000651541
MSMB	protein_coding	-1.0988	0.409731	-2.68175	0.00732382	0.0256196
SCUBE1	protein_coding	-1.09967	0.226097	-4.86373	1.15195e-06	1.62814e-05
KCNK12	protein_coding	-1.10062	0.218361	-5.04035	4.64682e-07	7.43238e-06
FFAR2	protein_coding	-1.10151	0.261487	-4.21249	2.52571e-05	0.000225535
UCMA	protein_coding	-1.10283	0.459936	-2.39779	0.0164944	0.0495169
PRRT4	protein_coding	-1.10322	0.285599	-3.86285	0.000112071	0.000794052
DPPA4	protein_coding	-1.10488	0.258988	-4.26614	1.98884e-05	0.000183611
MAP4K1	protein_coding	-1.10496	0.197662	-5.59013	2.26895e-08	5.5841e-07
FNDC5	protein_coding	-1.10551	0.154526	-7.1542	8.41634e-13	6.90448e-11
LCT	protein_coding	-1.10554	0.418485	-2.64176	0.00824774	0.0282252
GABRA5	protein_coding	-1.10582	0.287777	-3.84262	0.000121728	0.000851401
THEMIS	protein_coding	-1.10597	0.232061	-4.76585	1.88055e-06	2.47455e-05
TESPA1	protein_coding	-1.10627	0.21416	-5.16561	2.39658e-07	4.21765e-06
KCNQ5	protein_coding	-1.1064	0.211492	-5.23142	1.68209e-07	3.11942e-06
RCSD1	protein_coding	-1.10746	0.186586	-5.93539	2.9315e-09	9.24198e-08
ADGB	protein_coding	-1.1083	0.376919	-2.94042	0.00327763	0.0133055
SLC5A7	protein_coding	-1.10852	0.361129	-3.0696	0.00214348	0.00936089
CPNE4	protein_coding	-1.10922	0.264254	-4.19756	2.69805e-05	0.00023872
ANO3	protein_coding	-1.10968	0.267336	-4.15088	3.31204e-05	0.000284688
SHANK1	protein_coding	-1.11149	0.212227	-5.23728	1.62958e-07	3.03237e-06
CFAP70	protein_coding	-1.11193	0.200297	-5.55144	2.83326e-08	6.70284e-07
ASB2	protein_coding	-1.11223	0.235238	-4.72811	2.26624e-06	2.89907e-05
CRB1	protein_coding	-1.11289	0.280504	-3.96746	7.2643e-05	0.000548409
CUX2	protein_coding	-1.11304	0.20319	-5.47783	4.30566e-08	9.62013e-07
FAM167A	protein_coding	-1.11309	0.203185	-5.47819	4.29707e-08	9.60847e-07
TTLL7	protein_coding	-1.11315	0.161145	-6.90773	4.92483e-12	3.27295e-10
UGT2B15	protein_coding	-1.1133	0.336259	-3.31084	0.000930175	0.00469667
LRRC2	protein_coding	-1.11363	0.19052	-5.84524	5.05852e-09	1.49071e-07
ITIH6	protein_coding	-1.11372	0.447717	-2.48756	0.0128624	0.0405876
DIRAS2	protein_coding	-1.11476	0.234984	-4.74397	2.09566e-06	2.70626e-05
SCRG1	protein_coding	-1.11502	0.238845	-4.66838	3.03591e-06	3.69622e-05
CRMP1	protein_coding	-1.11509	0.175596	-6.3503	2.14895e-10	9.1696e-09
PLCXD3	protein_coding	-1.11511	0.261594	-4.26274	2.01935e-05	0.000185978
MAGEB17	protein_coding	-1.11528	0.288952	-3.85973	0.000113514	0.000802039
TIFAB	protein_coding	-1.11591	0.242967	-4.59285	4.37232e-06	5.03748e-05
PRPH	protein_coding	-1.116	0.264339	-4.22185	2.42302e-05	0.00021769
VAT1L	protein_coding	-1.11639	0.180867	-6.17244	6.72449e-10	2.57033e-08
SLC5A4	protein_coding	-1.11678	0.194124	-5.7529	8.77228e-09	2.42666e-07
UTS2R	protein_coding	-1.11698	0.385263	-2.89926	0.00374047	0.0148432
TAC1	protein_coding	-1.11881	0.323447	-3.459	0.000542177	0.00298749
AC116565.1	protein_coding	-1.11898	0.342585	-3.26628	0.00108971	0.0053548
TBC1D10C	protein_coding	-1.11898	0.209162	-5.34985	8.80261e-08	1.7814e-06
SELP	protein_coding	-1.11931	0.200585	-5.58021	2.40223e-08	5.8592e-07
P2RX1	protein_coding	-1.12042	0.234802	-4.77176	1.82623e-06	2.41306e-05
ASB16	protein_coding	-1.12598	0.1753	-6.42314	1.33493e-10	5.99103e-09
GPM6A	protein_coding	-1.12614	0.275321	-4.09026	4.30883e-05	0.000354167
KRT24	protein_coding	-1.12636	0.368943	-3.05295	0.00226606	0.00980084
FAM110D	protein_coding	-1.12707	0.165761	-6.79938	1.05069e-11	6.44384e-10
CHI3L2	protein_coding	-1.12957	0.229771	-4.91604	8.83111e-07	1.2947e-05
TPPP	protein_coding	-1.12982	0.206148	-5.48062	4.23835e-08	9.50501e-07
IKZF1	protein_coding	-1.13002	0.204363	-5.5295	3.21154e-08	7.46136e-07
RTL9	protein_coding	-1.13042	0.240834	-4.69378	2.68198e-06	3.34345e-05
RAB6C	protein_coding	-1.13183	0.233433	-4.84863	1.2432e-06	1.73906e-05
UNC45B	protein_coding	-1.13221	0.21297	-5.31632	1.0589e-07	2.09077e-06
FHL1	protein_coding	-1.13233	0.170741	-6.63183	3.31548e-11	1.78386e-09
TPO	protein_coding	-1.13316	0.282712	-4.00816	6.11939e-05	0.000475624
SLC1A2	protein_coding	-1.13345	0.310254	-3.65331	0.000258879	0.00159849
SOWAHA	protein_coding	-1.13364	0.209278	-5.4169	6.06421e-08	1.2938e-06
PTN	protein_coding	-1.13366	0.208336	-5.44151	5.28308e-08	1.149e-06
COX6A2	protein_coding	-1.13393	0.375806	-3.01734	0.00255006	0.0107822
AC119396.1	protein_coding	-1.13399	0.221589	-5.11756	3.09512e-07	5.24055e-06
SSUH2	protein_coding	-1.13456	0.199587	-5.68454	1.31162e-08	3.4554e-07
CD1B	protein_coding	-1.13518	0.274779	-4.13127	3.60766e-05	0.000305156
MYH7	protein_coding	-1.13603	0.384477	-2.95473	0.0031294	0.0128046
ZNF98	protein_coding	-1.13669	0.272596	-4.16988	3.04757e-05	0.00026494
FGA	protein_coding	-1.13679	0.354429	-3.20739	0.00133946	0.00635449
SYN1	protein_coding	-1.13704	0.213157	-5.3343	9.5912e-08	1.9196e-06
CD37	protein_coding	-1.1371	0.21067	-5.39755	6.75588e-08	1.41758e-06
IDO2	protein_coding	-1.13778	0.219258	-5.18921	2.11192e-07	3.78943e-06
PLPPR1	protein_coding	-1.13952	0.305177	-3.73396	0.000188491	0.0012264
ADRA1A	protein_coding	-1.14059	0.238203	-4.7883	1.68202e-06	2.25215e-05
RCAN2	protein_coding	-1.1427	0.147835	-7.72952	1.07949e-14	1.46546e-12
CD40LG	protein_coding	-1.14276	0.238943	-4.78257	1.73066e-06	2.30757e-05
F11	protein_coding	-1.14293	0.314485	-3.63427	0.000278768	0.00169875
COL6A5	protein_coding	-1.14347	0.312875	-3.65471	0.00025747	0.00159107
PYDC1	protein_coding	-1.14396	0.354113	-3.23049	0.0012358	0.00594928
ALOX15	protein_coding	-1.14405	0.250838	-4.56092	5.09309e-06	5.73285e-05
VSTM2B	protein_coding	-1.14408	0.465668	-2.45686	0.0140158	0.0434471
RAPGEF4	protein_coding	-1.14458	0.145863	-7.84699	4.26141e-15	6.27645e-13
ARNT2	protein_coding	-1.14471	0.162564	-7.0416	1.90044e-12	1.40225e-10
P2RY8	protein_coding	-1.14508	0.187171	-6.11783	9.4858e-10	3.45941e-08
COL14A1	protein_coding	-1.14516	0.201837	-5.67369	1.39756e-08	3.64655e-07
SLC17A6	protein_coding	-1.14538	0.409257	-2.79868	0.00513126	0.0191585
IL7R	protein_coding	-1.14942	0.226122	-5.08319	3.71143e-07	6.13166e-06
SLC27A6	protein_coding	-1.1498	0.278014	-4.13577	3.53773e-05	0.000300297
PPP1R16B	protein_coding	-1.15008	0.174705	-6.58299	4.6109e-11	2.37371e-09
BHMT	protein_coding	-1.15061	0.271743	-4.23418	2.2939e-05	0.000207654
DCDC1	protein_coding	-1.15063	0.206507	-5.57185	2.52054e-08	6.08552e-07
SPOCK3	protein_coding	-1.15132	0.319011	-3.60902	0.000307356	0.00184177
TTC29	protein_coding	-1.15217	0.396653	-2.90473	0.00367567	0.0146363
HPCA	protein_coding	-1.1525	0.192108	-5.99925	1.98235e-09	6.58143e-08
HCN1	protein_coding	-1.15292	0.295101	-3.90688	9.34956e-05	0.000679348
SERPINI1	protein_coding	-1.15421	0.177859	-6.48949	8.61258e-11	4.09146e-09
CLEC4F	protein_coding	-1.15433	0.234511	-4.92228	8.55424e-07	1.25846e-05
AWAT2	protein_coding	-1.15451	0.455205	-2.53624	0.0112049	0.0363309
PPP2R2B	protein_coding	-1.1547	0.201309	-5.73592	9.69842e-09	2.63508e-07
TRAF3IP3	protein_coding	-1.15541	0.19664	-5.87575	4.20921e-09	1.26832e-07
C1QTNF4	protein_coding	-1.15578	0.230376	-5.01692	5.25064e-07	8.30171e-06
RSPO3	protein_coding	-1.15584	0.248422	-4.65272	3.27582e-06	3.93335e-05
ATP6V1G2	protein_coding	-1.15716	0.152716	-7.57722	3.53044e-14	4.02017e-12
CNKSR2	protein_coding	-1.15784	0.194249	-5.96063	2.51274e-09	8.08488e-08
FLT3	protein_coding	-1.15808	0.265062	-4.36907	1.24774e-05	0.000122712
EPB41L3	protein_coding	-1.15827	0.150253	-7.70879	1.27012e-14	1.68234e-12
RLN1	protein_coding	-1.15882	0.20977	-5.52424	3.30912e-08	7.65978e-07
GAMT	protein_coding	-1.1603	0.216677	-5.35496	8.55749e-08	1.74217e-06
SERPINA1	protein_coding	-1.16052	0.235732	-4.92306	8.52007e-07	1.25488e-05
ADGRG2	protein_coding	-1.16081	0.255823	-4.53754	5.69135e-06	6.29846e-05
EDA	protein_coding	-1.1618	0.164772	-7.05098	1.77659e-12	1.32366e-10
SLC14A2	protein_coding	-1.16236	0.212241	-5.47662	4.33534e-08	9.67701e-07
CLUL1	protein_coding	-1.16252	0.211601	-5.49395	3.93033e-08	8.93289e-07
ALK	protein_coding	-1.16304	0.213208	-5.45499	4.8977e-08	1.07783e-06
MCF2L2	protein_coding	-1.16379	0.164996	-7.05346	1.74523e-12	1.30284e-10
LAMB4	protein_coding	-1.16393	0.164707	-7.06668	1.58684e-12	1.20344e-10
GPR33	protein_coding	-1.16397	0.368662	-3.15727	0.00159252	0.00733427
ACER1	protein_coding	-1.16455	0.27453	-4.24199	2.21549e-05	0.000201368
PDZK1	protein_coding	-1.16501	0.216473	-5.3818	7.37464e-08	1.52891e-06
ALB	protein_coding	-1.16573	0.387294	-3.00993	0.00261308	0.0109987
SLC26A11	protein_coding	-1.16707	0.137947	-8.46029	2.66705e-17	6.52587e-15
PROK2	protein_coding	-1.16716	0.289581	-4.03053	5.56519e-05	0.000439262
PDE3B	protein_coding	-1.16743	0.184614	-6.32359	2.55557e-10	1.07247e-08
RHOH	protein_coding	-1.16756	0.208731	-5.59364	2.22354e-08	5.49005e-07
SPDYE4	protein_coding	-1.16816	0.33315	-3.5064	0.000454204	0.00257473
CD28	protein_coding	-1.16954	0.215938	-5.41611	6.09112e-08	1.29809e-06
KCNN3	protein_coding	-1.16968	0.161289	-7.2521	4.10356e-13	3.74494e-11
CXCL12	protein_coding	-1.17002	0.204049	-5.73402	9.80801e-09	2.65729e-07
FAM69B	protein_coding	-1.17176	0.179603	-6.52417	6.83791e-11	3.32712e-09
HRASLS	protein_coding	-1.17228	0.208554	-5.62101	1.8984e-08	4.76749e-07
GPR174	protein_coding	-1.17342	0.256839	-4.56871	4.90733e-06	5.55888e-05
SYNPO2	protein_coding	-1.17406	0.204691	-5.73574	9.70901e-09	2.6355e-07
KCNH7	protein_coding	-1.1741	0.267678	-4.38623	1.15331e-05	0.000114691
SPINK2	protein_coding	-1.17482	0.254991	-4.60731	4.07912e-06	4.74553e-05
SH2D1A	protein_coding	-1.17513	0.233167	-5.03988	4.65832e-07	7.44766e-06
C2orf40	protein_coding	-1.17523	0.217409	-5.40562	6.4584e-08	1.36442e-06
CRB2	protein_coding	-1.1756	0.256936	-4.57546	4.75166e-06	5.39952e-05
TMEM236	protein_coding	-1.17561	0.209919	-5.60029	2.13997e-08	5.29058e-07
RNF150	protein_coding	-1.17599	0.16773	-7.0112	2.36286e-12	1.70712e-10
RGMA	protein_coding	-1.17691	0.207483	-5.67232	1.40879e-08	3.66584e-07
SLC17A1	protein_coding	-1.17727	0.283928	-4.14638	3.37778e-05	0.000289036
DPYSL5	protein_coding	-1.17761	0.307787	-3.82605	0.000130217	0.000900544
TMEM132C	protein_coding	-1.17869	0.245081	-4.80939	1.51393e-06	2.05501e-05
KIF26A	protein_coding	-1.17878	0.169315	-6.96205	3.35358e-12	2.32176e-10
TNMD	protein_coding	-1.17947	0.428032	-2.75556	0.00585918	0.0213735
GPM6B	protein_coding	-1.18021	0.174456	-6.76511	1.33209e-11	7.95232e-10
ELAVL3	protein_coding	-1.18026	0.232979	-5.06596	4.06342e-07	6.64412e-06
ANKRD55	protein_coding	-1.18062	0.242108	-4.87643	1.08023e-06	1.53759e-05
HSPB8	protein_coding	-1.18175	0.163083	-7.2463	4.28318e-13	3.87181e-11
PDIA2	protein_coding	-1.18241	0.398914	-2.96407	0.00303602	0.0124935
ANKRD30B	protein_coding	-1.18247	0.413867	-2.85713	0.00427489	0.0165256
EPHA5	protein_coding	-1.18266	0.240693	-4.91357	8.94317e-07	1.30962e-05
PHACTR1	protein_coding	-1.18362	0.15965	-7.41386	1.22678e-13	1.25802e-11
HSPB6	protein_coding	-1.18449	0.195121	-6.07051	1.27505e-09	4.48289e-08
RNF186	protein_coding	-1.18473	0.288005	-4.11358	3.89571e-05	0.000324662
NKAIN1	protein_coding	-1.18492	0.216165	-5.48154	4.2163e-08	9.48344e-07
LGI2	protein_coding	-1.18529	0.163438	-7.25226	4.09877e-13	3.74494e-11
ZIM2	protein_coding	-1.18567	0.308884	-3.83855	0.000123761	0.000862935
CERS4	protein_coding	-1.18572	0.148642	-7.977	1.49931e-15	2.45468e-13
WDFY4	protein_coding	-1.18655	0.214721	-5.52599	3.27638e-08	7.58858e-07
DPEP1	protein_coding	-1.18737	0.271859	-4.3676	1.25618e-05	0.000123313
IRF4	protein_coding	-1.18741	0.243716	-4.87208	1.10427e-06	1.56714e-05
AC138969.1	protein_coding	-1.18914	0.198707	-5.98437	2.17234e-09	7.10705e-08
SULT4A1	protein_coding	-1.18969	0.302079	-3.93834	8.20489e-05	0.000607085
PNMA6F	protein_coding	-1.19017	0.384502	-3.09534	0.00196585	0.008726
KCNE2	protein_coding	-1.19063	0.22943	-5.1895	2.1086e-07	3.78525e-06
TMEM61	protein_coding	-1.19063	0.234156	-5.08475	3.68103e-07	6.09199e-06
CORO2B	protein_coding	-1.19132	0.156974	-7.58932	3.216e-14	3.74027e-12
GJB7	protein_coding	-1.19142	0.424334	-2.80774	0.00498902	0.018719
PGBD5	protein_coding	-1.19144	0.167192	-7.12618	1.03194e-12	8.2011e-11
ZNF667	protein_coding	-1.19176	0.152974	-7.79058	6.67021e-15	9.49435e-13
ZNF727	protein_coding	-1.19193	0.192678	-6.18613	6.16606e-10	2.37833e-08
GNB3	protein_coding	-1.19352	0.16654	-7.16656	7.69034e-13	6.37747e-11
MAGEE2	protein_coding	-1.19368	0.233625	-5.10938	3.23214e-07	5.43156e-06
MANSC4	protein_coding	-1.19394	0.292957	-4.07549	4.59176e-05	0.000374198
PCBP3	protein_coding	-1.19498	0.158791	-7.52552	5.25122e-14	5.69156e-12
FNDC9	protein_coding	-1.19526	0.282091	-4.23716	2.26366e-05	0.000205063
FREM1	protein_coding	-1.19604	0.220042	-5.43551	5.46396e-08	1.18227e-06
FAM171A2	protein_coding	-1.19613	0.187175	-6.39043	1.65425e-10	7.29534e-09
CCDC141	protein_coding	-1.19628	0.243215	-4.91864	8.71491e-07	1.28012e-05
PSD	protein_coding	-1.19679	0.181129	-6.60737	3.91198e-11	2.0669e-09
KLKB1	protein_coding	-1.19705	0.223695	-5.35125	8.73507e-08	1.76961e-06
CD48	protein_coding	-1.19847	0.223297	-5.36718	7.99793e-08	1.64473e-06
CACNA1H	protein_coding	-1.19898	0.163892	-7.31568	2.56082e-13	2.46686e-11
RASA4	protein_coding	-1.19901	0.170921	-7.015	2.29952e-12	1.66767e-10
CECR2	protein_coding	-1.19962	0.209139	-5.73599	9.69447e-09	2.63508e-07
CA4	protein_coding	-1.19974	0.352417	-3.40431	0.000663316	0.00353401
MAP2	protein_coding	-1.19999	0.196602	-6.10365	1.03673e-09	3.73095e-08
RHBDL3	protein_coding	-1.20045	0.171679	-6.9924	2.70222e-12	1.91601e-10
SLC5A8	protein_coding	-1.20077	0.341837	-3.51269	0.000443597	0.0025283
CFAP161	protein_coding	-1.20106	0.243153	-4.93952	7.83154e-07	1.17295e-05
RAB9B	protein_coding	-1.20108	0.164415	-7.30515	2.76951e-13	2.65448e-11
GLT1D1	protein_coding	-1.20129	0.210005	-5.72031	1.06329e-08	2.86855e-07
SLC6A19	protein_coding	-1.20213	0.328227	-3.66251	0.00024976	0.0015492
NYAP2	protein_coding	-1.20225	0.253527	-4.7421	2.11519e-06	2.72595e-05
PHOX2A	protein_coding	-1.20227	0.378154	-3.17931	0.00147626	0.00689206
BARHL1	protein_coding	-1.20387	0.401555	-2.99803	0.00271731	0.0113695
CD200	protein_coding	-1.2042	0.166789	-7.21991	5.20226e-13	4.52051e-11
RGS7	protein_coding	-1.20434	0.240769	-5.00206	5.672e-07	8.89313e-06
CARMIL2	protein_coding	-1.20452	0.210775	-5.71471	1.09888e-08	2.95621e-07
GAP43	protein_coding	-1.20482	0.231508	-5.20424	1.94796e-07	3.53684e-06
USP27X	protein_coding	-1.20651	0.173202	-6.9659	3.26319e-12	2.26741e-10
IL20	protein_coding	-1.20683	0.36228	-3.3312	0.000864724	0.00441706
GIPR	protein_coding	-1.20724	0.245974	-4.90803	9.1998e-07	1.34e-05
PDXP	protein_coding	-1.20768	0.21748	-5.55308	2.80679e-08	6.66275e-07
EML6	protein_coding	-1.20769	0.172064	-7.01884	2.23715e-12	1.62891e-10
IGFN1	protein_coding	-1.20798	0.272301	-4.43621	9.15553e-06	9.42407e-05
FBXO15	protein_coding	-1.20993	0.215666	-5.6102	2.02088e-08	5.03201e-07
RPRM	protein_coding	-1.21027	0.308923	-3.9177	8.93991e-05	0.000652566
GPR158	protein_coding	-1.21096	0.269504	-4.49327	7.01363e-06	7.54552e-05
CPEB1	protein_coding	-1.21149	0.166257	-7.2869	3.17167e-13	3.00223e-11
GPHA2	protein_coding	-1.21185	0.43329	-2.79685	0.00516032	0.0192557
CES5A	protein_coding	-1.21228	0.348348	-3.48007	0.000501286	0.00280184
CACNA2D3	protein_coding	-1.21324	0.207752	-5.83985	5.22484e-09	1.53553e-07
FAM181B	protein_coding	-1.21392	0.219889	-5.52061	3.37815e-08	7.80063e-07
44166	protein_coding	-1.21446	0.272657	-4.45417	8.42167e-06	8.79686e-05
FAM155B	protein_coding	-1.21449	0.218837	-5.54975	2.86085e-08	6.74492e-07
BVES	protein_coding	-1.21464	0.18843	-6.4461	1.14765e-10	5.21807e-09
CAPSL	protein_coding	-1.21473	0.355656	-3.41548	0.000636694	0.00341651
FAM183A	protein_coding	-1.21592	0.36128	-3.3656	0.00076377	0.00397538
TRDN	protein_coding	-1.21644	0.421785	-2.88403	0.0039262	0.0154309
NPPC	protein_coding	-1.21653	0.352914	-3.44711	0.000566625	0.00310071
PYHIN1	protein_coding	-1.21662	0.219946	-5.53144	3.17607e-08	7.39667e-07
TNFSF8	protein_coding	-1.21902	0.223619	-5.45133	4.99946e-08	1.09606e-06
DGKB	protein_coding	-1.21961	0.248116	-4.91547	8.85703e-07	1.2975e-05
CTCFL	protein_coding	-1.21971	0.372149	-3.27748	0.00104739	0.00518554
LRRN2	protein_coding	-1.22066	0.179245	-6.80999	9.76029e-12	6.04425e-10
STAR	protein_coding	-1.22083	0.215008	-5.67806	1.36228e-08	3.57405e-07
C14orf132	protein_coding	-1.22119	0.176932	-6.90204	5.12624e-12	3.38323e-10
SLC2A4	protein_coding	-1.22225	0.198653	-6.15271	7.61719e-10	2.87381e-08
IGSF1	protein_coding	-1.22237	0.257959	-4.73862	2.15177e-06	2.76749e-05
DUSP15	protein_coding	-1.22454	0.197471	-6.20114	5.60543e-10	2.18417e-08
TYR	protein_coding	-1.22461	0.420082	-2.91517	0.00355501	0.014251
UCP1	protein_coding	-1.22489	0.313866	-3.90259	9.51707e-05	0.000689449
CDH19	protein_coding	-1.22692	0.283182	-4.33261	1.47349e-05	0.000141442
C10orf142	protein_coding	-1.22801	0.276336	-4.4439	8.83423e-06	9.15261e-05
KIAA1644	protein_coding	-1.22828	0.218779	-5.61426	1.97409e-08	4.92195e-07
FFAR3	protein_coding	-1.22839	0.240666	-5.10414	3.32307e-07	5.56476e-06
FAM46C	protein_coding	-1.22842	0.174422	-7.04277	1.88457e-12	1.39323e-10
44079	protein_coding	-1.22929	0.15615	-7.87247	3.47719e-15	5.20174e-13
FOXP2	protein_coding	-1.22951	0.200203	-6.1413	8.18488e-10	3.0402e-08
PCP4L1	protein_coding	-1.23063	0.221071	-5.56666	2.5967e-08	6.24566e-07
OR13A1	protein_coding	-1.23082	0.260048	-4.73306	2.2116e-06	2.83773e-05
PRRT3	protein_coding	-1.231	0.181266	-6.79113	1.11261e-11	6.77997e-10
DPY19L2	protein_coding	-1.23105	0.206	-5.97595	2.28757e-09	7.43304e-08
PCLO	protein_coding	-1.23109	0.236481	-5.20587	1.93085e-07	3.50744e-06
ANGPTL1	protein_coding	-1.23161	0.221025	-5.57227	2.51435e-08	6.07825e-07
CNTN2	protein_coding	-1.23167	0.258471	-4.76522	1.88649e-06	2.48151e-05
ITGAD	protein_coding	-1.23545	0.225161	-5.48697	4.0888e-08	9.24025e-07
OTC	protein_coding	-1.23555	0.390815	-3.16147	0.00156974	0.00725376
RGS11	protein_coding	-1.23595	0.207729	-5.94981	2.68457e-09	8.5466e-08
CETP	protein_coding	-1.23602	0.175621	-7.038	1.9502e-12	1.43342e-10
ACOT12	protein_coding	-1.23648	0.330623	-3.73985	0.000184133	0.00120153
C4orf50	protein_coding	-1.23659	0.241358	-5.12347	2.99962e-07	5.10605e-06
ADAMTS16	protein_coding	-1.2372	0.255575	-4.84087	1.29272e-06	1.79845e-05
DEFA4	protein_coding	-1.23725	0.394121	-3.13927	0.0016937	0.00771735
NWD2	protein_coding	-1.23755	0.273569	-4.52373	6.07605e-06	6.65852e-05
CLU	protein_coding	-1.23811	0.207867	-5.95628	2.58041e-09	8.25105e-08
NBEA	protein_coding	-1.23837	0.190738	-6.4925	8.44221e-11	4.02054e-09
GNG7	protein_coding	-1.23887	0.175233	-7.06983	1.55123e-12	1.18586e-10
PCDHA5	protein_coding	-1.23954	0.261905	-4.73278	2.2146e-06	2.84064e-05
PEG3	protein_coding	-1.24018	0.187563	-6.61207	3.78989e-11	2.01075e-09
COL26A1	protein_coding	-1.24023	0.236828	-5.23684	1.63352e-07	3.03674e-06
ASB9	protein_coding	-1.24102	0.229624	-5.40459	6.49581e-08	1.37055e-06
CLPSL2	protein_coding	-1.24297	0.408939	-3.03949	0.00236977	0.0101607
IL33	protein_coding	-1.24301	0.186647	-6.65971	2.74365e-11	1.50593e-09
CTSG	protein_coding	-1.24371	0.265435	-4.68556	2.79198e-06	3.4591e-05
POPDC3	protein_coding	-1.24442	0.265479	-4.68745	2.76635e-06	3.4318e-05
TMCO2	protein_coding	-1.24548	0.431418	-2.88694	0.00389012	0.015316
ACKR1	protein_coding	-1.24568	0.264015	-4.71821	2.37925e-06	3.02336e-05
MAL	protein_coding	-1.24575	0.25115	-4.96019	7.04254e-07	1.07332e-05
APBB1	protein_coding	-1.24655	0.155514	-8.01563	1.09573e-15	1.85773e-13
KCNA3	protein_coding	-1.2467	0.210893	-5.91155	3.38904e-09	1.05193e-07
AOX1	protein_coding	-1.24717	0.240194	-5.19233	2.07681e-07	3.73808e-06
LRRTM3	protein_coding	-1.24763	0.385175	-3.23912	0.00119897	0.00579794
ZNF540	protein_coding	-1.24798	0.162454	-7.68203	1.56591e-14	2.01128e-12
CPNE6	protein_coding	-1.24833	0.31506	-3.96221	7.42602e-05	0.000558408
TSPAN33	protein_coding	-1.24865	0.168261	-7.42092	1.16312e-13	1.19918e-11
GZMK	protein_coding	-1.2491	0.239601	-5.21327	1.85541e-07	3.39464e-06
ABRA	protein_coding	-1.2493	0.350718	-3.56212	0.000367865	0.00215792
HTR4	protein_coding	-1.25167	0.297425	-4.20837	2.57216e-05	0.000229306
ZAP70	protein_coding	-1.25264	0.211974	-5.90943	3.43288e-09	1.06467e-07
BEX4	protein_coding	-1.25332	0.158726	-7.8961	2.87765e-15	4.37345e-13
SLC25A34	protein_coding	-1.25366	0.180537	-6.94406	3.80989e-12	2.58923e-10
DEFB124	protein_coding	-1.25494	0.244135	-5.14034	2.74239e-07	4.73581e-06
C16orf89	protein_coding	-1.25529	0.236728	-5.30266	1.14128e-07	2.2315e-06
GLIPR1L2	protein_coding	-1.25671	0.211742	-5.93508	2.93698e-09	9.2516e-08
MAGEL2	protein_coding	-1.25673	0.20698	-6.07174	1.2653e-09	4.46096e-08
C16orf96	protein_coding	-1.25696	0.191652	-6.55858	5.43228e-11	2.71949e-09
MAFA	protein_coding	-1.25721	0.367336	-3.42252	0.000620434	0.00334573
PROK1	protein_coding	-1.25738	0.309881	-4.05762	4.95755e-05	0.000399652
SYT9	protein_coding	-1.25815	0.263206	-4.78011	1.75202e-06	2.33197e-05
PCDHA2	protein_coding	-1.2599	0.22201	-5.67499	1.38695e-08	3.62383e-07
CLCNKA	protein_coding	-1.26054	0.267763	-4.70766	2.50575e-06	3.15885e-05
MRAP	protein_coding	-1.26102	0.400879	-3.14564	0.00165721	0.00758278
TCEAL6	protein_coding	-1.26118	0.248168	-5.08194	3.73596e-07	6.16417e-06
C21orf58	protein_coding	-1.2615	0.196183	-6.43023	1.27415e-10	5.75206e-09
IL6	protein_coding	-1.26156	0.299581	-4.21108	2.54157e-05	0.000226791
ATP2A3	protein_coding	-1.26249	0.207997	-6.06975	1.28112e-09	4.50009e-08
GCH1	protein_coding	-1.2628	0.167038	-7.55999	4.03103e-14	4.50944e-12
GHR	protein_coding	-1.26305	0.188646	-6.69532	2.15204e-11	1.20726e-09
OSBPL6	protein_coding	-1.26508	0.189907	-6.66156	2.70934e-11	1.49139e-09
PLA2G2D	protein_coding	-1.26508	0.325003	-3.89253	9.92057e-05	0.000714577
TTC24	protein_coding	-1.26568	0.292292	-4.3302	1.48972e-05	0.000142749
RBFOX3	protein_coding	-1.26575	0.247028	-5.1239	2.99273e-07	5.0966e-06
ICAM3	protein_coding	-1.26577	0.215955	-5.86126	4.59362e-09	1.36901e-07
TUSC3	protein_coding	-1.26616	0.18709	-6.76764	1.309e-11	7.85132e-10
DNAJC12	protein_coding	-1.26636	0.209894	-6.03333	1.60617e-09	5.4706e-08
SV2B	protein_coding	-1.26684	0.261761	-4.83969	1.30044e-06	1.80655e-05
RBM11	protein_coding	-1.26686	0.192128	-6.59382	4.28647e-11	2.23863e-09
NOVA2	protein_coding	-1.26793	0.155839	-8.13617	4.07972e-16	7.41091e-14
CLEC4M	protein_coding	-1.26845	0.452082	-2.8058	0.00501913	0.0188075
LY9	protein_coding	-1.27018	0.236641	-5.36751	7.98291e-08	1.64252e-06
ABCD2	protein_coding	-1.27064	0.205559	-6.18139	6.35394e-10	2.44339e-08
PRL	protein_coding	-1.27067	0.311103	-4.0844	4.41901e-05	0.000362287
ARG1	protein_coding	-1.27281	0.21255	-5.98827	2.12086e-09	6.97452e-08
SCN11A	protein_coding	-1.27298	0.177134	-7.18653	6.64609e-13	5.63632e-11
PRIMA1	protein_coding	-1.27544	0.25703	-4.96222	6.96922e-07	1.06342e-05
CD36	protein_coding	-1.27565	0.217991	-5.85186	4.86111e-09	1.43973e-07
SCN4A	protein_coding	-1.27566	0.208267	-6.1251	9.06283e-10	3.32423e-08
TRAT1	protein_coding	-1.27607	0.245763	-5.19227	2.07742e-07	3.73808e-06
PDE6H	protein_coding	-1.27675	0.448402	-2.84733	0.00440875	0.0169554
THBS4	protein_coding	-1.27699	0.225101	-5.67298	1.40337e-08	3.65922e-07
CROCC2	protein_coding	-1.2774	0.31626	-4.03908	5.36616e-05	0.00042682
ZP2	protein_coding	-1.27825	0.405118	-3.15526	0.00160356	0.00737711
NRG2	protein_coding	-1.27951	0.215074	-5.94917	2.69501e-09	8.56723e-08
RAB26	protein_coding	-1.2807	0.255455	-5.0134	5.34766e-07	8.4401e-06
KCNH1	protein_coding	-1.281	0.17467	-7.33386	2.2362e-13	2.17613e-11
GPR88	protein_coding	-1.28201	0.235739	-5.43826	5.38031e-08	1.16748e-06
SAGE1	protein_coding	-1.2834	0.369059	-3.47748	0.000506155	0.00282327
HMX1	protein_coding	-1.28356	0.515355	-2.49063	0.0127517	0.0403016
TKTL1	protein_coding	-1.28416	0.235191	-5.4601	4.75869e-08	1.05052e-06
SPINK4	protein_coding	-1.28489	0.473622	-2.7129	0.00666963	0.0237294
FAM218A	protein_coding	-1.28508	0.190863	-6.73299	1.66215e-11	9.70997e-10
MYRIP	protein_coding	-1.28688	0.215077	-5.98334	2.18605e-09	7.14577e-08
CCDC151	protein_coding	-1.28819	0.227266	-5.66822	1.44285e-08	3.7468e-07
KCNH3	protein_coding	-1.28918	0.220495	-5.84675	5.01258e-09	1.47999e-07
SCML4	protein_coding	-1.28937	0.191223	-6.74277	1.55397e-11	9.16217e-10
TP53TG3D	protein_coding	-1.2905	0.317892	-4.05955	4.91672e-05	0.000396948
SALL2	protein_coding	-1.29064	0.166024	-7.77381	7.61587e-15	1.07204e-12
P2RY14	protein_coding	-1.29155	0.217447	-5.9396	2.85716e-09	9.02253e-08
ICA1L	protein_coding	-1.29183	0.162365	-7.95633	1.77221e-15	2.84052e-13
IL2	protein_coding	-1.29202	0.329933	-3.91601	9.00249e-05	0.00065638
LONRF2	protein_coding	-1.29258	0.185788	-6.95727	3.46924e-12	2.38883e-10
FAM216B	protein_coding	-1.29311	0.271186	-4.76836	1.85733e-06	2.44737e-05
NCR3	protein_coding	-1.29434	0.246087	-5.25969	1.44296e-07	2.72768e-06
CLEC9A	protein_coding	-1.29587	0.211801	-6.11832	9.45654e-10	3.45535e-08
SMLR1	protein_coding	-1.2961	0.274467	-4.72223	2.33275e-06	2.9712e-05
INSL5	protein_coding	-1.29618	0.448971	-2.887	0.00388928	0.0153158
VIT	protein_coding	-1.29828	0.272629	-4.76208	1.91606e-06	2.51434e-05
ABAT	protein_coding	-1.29872	0.204389	-6.35414	2.09593e-10	9.00377e-09
SPATA4	protein_coding	-1.30066	0.281165	-4.62596	3.72861e-06	4.38888e-05
GPR171	protein_coding	-1.30088	0.220918	-5.88852	3.89666e-09	1.19202e-07
AICDA	protein_coding	-1.30176	0.319474	-4.07469	4.60764e-05	0.000375411
ST8SIA5	protein_coding	-1.30335	0.222224	-5.86503	4.49053e-09	1.34038e-07
ENAM	protein_coding	-1.30522	0.272773	-4.78501	1.70975e-06	2.28768e-05
ARG2	protein_coding	-1.30536	0.186403	-7.00292	2.50688e-12	1.79419e-10
A1BG	protein_coding	-1.30555	0.196289	-6.65118	2.90746e-11	1.58444e-09
LYVE1	protein_coding	-1.30777	0.194262	-6.73203	1.67317e-11	9.75937e-10
TNXB	protein_coding	-1.30846	0.198983	-6.57574	4.84113e-11	2.46891e-09
FOSB	protein_coding	-1.30863	0.285819	-4.57853	4.68259e-06	5.33692e-05
GPD1	protein_coding	-1.30898	0.258319	-5.06729	4.03523e-07	6.60085e-06
GABRB3	protein_coding	-1.30937	0.255018	-5.13441	2.83032e-07	4.86343e-06
GALNT13	protein_coding	-1.30981	0.235216	-5.56857	2.56839e-08	6.18149e-07
OIT3	protein_coding	-1.31057	0.194884	-6.72489	1.7572e-11	1.01738e-09
AC026464.1	protein_coding	-1.31141	0.446689	-2.93586	0.00332627	0.0134642
POU3F3	protein_coding	-1.31184	0.484893	-2.70543	0.00682156	0.0241659
GIMAP5	protein_coding	-1.31313	0.173165	-7.58311	3.37359e-14	3.86463e-12
KCNMA1	protein_coding	-1.31382	0.200452	-6.55428	5.59109e-11	2.79166e-09
ARFGEF3	protein_coding	-1.31466	0.212152	-6.19676	5.7636e-10	2.23894e-08
NR4A3	protein_coding	-1.31556	0.256569	-5.1275	2.93617e-07	5.01371e-06
GHRH	protein_coding	-1.31562	0.514617	-2.5565	0.0105731	0.0346232
FAM107A	protein_coding	-1.31737	0.184161	-7.15335	8.46856e-13	6.93241e-11
FAM71F1	protein_coding	-1.31776	0.349791	-3.76728	0.000165033	0.00109563
CACNG7	protein_coding	-1.31786	0.369336	-3.5682	0.000359448	0.00211635
SLIT3	protein_coding	-1.31791	0.190364	-6.92307	4.41945e-12	2.97334e-10
RASGEF1C	protein_coding	-1.31845	0.242286	-5.44171	5.27708e-08	1.14834e-06
SYT6	protein_coding	-1.31896	0.327177	-4.03133	5.54626e-05	0.00043811
EFCAB8	protein_coding	-1.31904	0.238695	-5.52605	3.27526e-08	7.58858e-07
B3GAT1	protein_coding	-1.31951	0.236107	-5.58861	2.28898e-08	5.61529e-07
PLD5	protein_coding	-1.3201	0.279089	-4.73004	2.24473e-06	2.87541e-05
FXYD2	protein_coding	-1.32075	0.295496	-4.4696	7.83664e-06	8.281e-05
ZNF157	protein_coding	-1.32079	0.248539	-5.31423	1.07112e-07	2.10836e-06
HMX2	protein_coding	-1.32148	0.385549	-3.42754	0.000609077	0.00329801
TUBB1	protein_coding	-1.32213	0.1903	-6.9476	3.71551e-12	2.53099e-10
YIPF7	protein_coding	-1.3228	0.270806	-4.88467	1.03601e-06	1.4835e-05
ABCA8	protein_coding	-1.32414	0.21189	-6.24921	4.12531e-10	1.65825e-08
TDRP	protein_coding	-1.32492	0.14018	-9.45156	3.33806e-21	3.33191e-18
TNFRSF13B	protein_coding	-1.32521	0.349663	-3.78997	0.000150665	0.00101496
CCL14	protein_coding	-1.32584	0.226183	-5.8618	4.5787e-09	1.36563e-07
CHRM2	protein_coding	-1.32937	0.387778	-3.42818	0.000607641	0.0032907
DLG2	protein_coding	-1.33112	0.176881	-7.5255	5.25187e-14	5.69156e-12
KCNK17	protein_coding	-1.33267	0.233925	-5.69701	1.21927e-08	3.24349e-07
FAM184A	protein_coding	-1.33281	0.152098	-8.76283	1.90417e-18	6.48557e-16
SELL	protein_coding	-1.33316	0.231417	-5.76085	8.36933e-09	2.327e-07
OR2B11	protein_coding	-1.33462	0.55316	-2.41272	0.015834	0.0479115
CBLN2	protein_coding	-1.33479	0.354113	-3.76938	0.000163652	0.00108798
CCNA1	protein_coding	-1.33483	0.216347	-6.16984	6.83602e-10	2.60513e-08
FAM19A1	protein_coding	-1.33583	0.246612	-5.41675	6.06915e-08	1.29413e-06
NKAIN2	protein_coding	-1.33639	0.291368	-4.5866	4.50524e-06	5.17032e-05
SEC11C	protein_coding	-1.33642	0.17203	-7.76852	7.94095e-15	1.11369e-12
SLCO5A1	protein_coding	-1.33692	0.187582	-7.12715	1.0247e-12	8.17764e-11
ZPBP2	protein_coding	-1.33895	0.457739	-2.92514	0.00344297	0.0138616
OLIG1	protein_coding	-1.33932	0.291452	-4.59532	4.32081e-06	4.98446e-05
HBA1	protein_coding	-1.34333	0.351599	-3.82063	0.000133111	0.000916567
FAM159B	protein_coding	-1.34626	0.339878	-3.96102	7.46315e-05	0.000560647
DMRT2	protein_coding	-1.34702	0.265071	-5.08173	3.74016e-07	6.16844e-06
SYNM	protein_coding	-1.35011	0.192365	-7.01847	2.24317e-12	1.62991e-10
SLC45A2	protein_coding	-1.35071	0.235125	-5.74465	9.21134e-09	2.5207e-07
NPPB	protein_coding	-1.35127	0.409261	-3.30172	0.000960944	0.00482394
SLC6A16	protein_coding	-1.35282	0.19615	-6.8969	5.31495e-12	3.48367e-10
GRIK2	protein_coding	-1.35375	0.219194	-6.17603	6.57346e-10	2.51765e-08
VTN	protein_coding	-1.354	0.267971	-5.05279	4.35393e-07	7.04067e-06
SLC10A6	protein_coding	-1.35454	0.191999	-7.05493	1.72682e-12	1.29163e-10
SIM1	protein_coding	-1.35484	0.423669	-3.19787	0.00138446	0.00651854
DPYS	protein_coding	-1.35493	0.247245	-5.48012	4.25039e-08	9.51524e-07
CTRC	protein_coding	-1.35525	0.523729	-2.58769	0.00966217	0.0321373
MYH2	protein_coding	-1.3553	0.312707	-4.3341	1.46358e-05	0.000140668
CLEC10A	protein_coding	-1.35835	0.212312	-6.39788	1.57553e-10	6.98048e-09
ARHGEF26	protein_coding	-1.35945	0.169386	-8.02574	1.00913e-15	1.71854e-13
GUCA2A	protein_coding	-1.36014	0.363583	-3.74092	0.000183347	0.00119701
NPTX2	protein_coding	-1.36098	0.233752	-5.82234	5.80305e-09	1.68726e-07
C5orf49	protein_coding	-1.361	0.268046	-5.07749	3.82463e-07	6.28899e-06
GP1BA	protein_coding	-1.36312	0.232042	-5.87442	4.24326e-09	1.27656e-07
WSCD1	protein_coding	-1.36337	0.169455	-8.04557	8.5842e-16	1.48173e-13
PTGDR2	protein_coding	-1.36468	0.255228	-5.34688	8.94827e-08	1.80513e-06
CCR4	protein_coding	-1.36509	0.256233	-5.32754	9.95539e-08	1.97796e-06
MAGEE1	protein_coding	-1.36546	0.173849	-7.85428	4.02083e-15	5.96819e-13
DSCR8	protein_coding	-1.36583	0.463006	-2.94991	0.00317863	0.0129685
TPSG1	protein_coding	-1.36588	0.260562	-5.24205	1.58805e-07	2.96376e-06
ASB11	protein_coding	-1.36603	0.335098	-4.07651	4.57163e-05	0.000372876
RSPH4A	protein_coding	-1.3666	0.226778	-6.02614	1.67921e-09	5.68807e-08
PABPN1L	protein_coding	-1.36674	0.340093	-4.01873	5.85126e-05	0.000458709
TIMD4	protein_coding	-1.36722	0.300912	-4.5436	5.53028e-06	6.15054e-05
SCN7A	protein_coding	-1.36738	0.25547	-5.35242	8.67842e-08	1.75906e-06
PLP1	protein_coding	-1.36817	0.278479	-4.91302	8.96862e-07	1.31142e-05
SLC26A3	protein_coding	-1.36849	0.444876	-3.07611	0.00209719	0.00919346
MBOAT4	protein_coding	-1.36876	0.248229	-5.51411	3.50548e-08	8.05079e-07
APOBEC4	protein_coding	-1.36937	0.316384	-4.3282	1.50331e-05	0.000143762
SNPH	protein_coding	-1.36948	0.170892	-8.01372	1.11285e-15	1.87013e-13
NRN1	protein_coding	-1.37119	0.180719	-7.58739	3.26418e-14	3.78476e-12
GLP1R	protein_coding	-1.37125	0.288537	-4.75242	2.00996e-06	2.61062e-05
SAXO2	protein_coding	-1.37161	0.224581	-6.10742	1.01255e-09	3.66011e-08
LYPD8	protein_coding	-1.37163	0.432361	-3.17242	0.00151173	0.00703009
GPLD1	protein_coding	-1.37222	0.169999	-8.0719	6.92153e-16	1.21117e-13
GPR150	protein_coding	-1.37334	0.209396	-6.55859	5.43202e-11	2.71949e-09
GLRA1	protein_coding	-1.37435	0.371838	-3.6961	0.000218937	0.00138826
AK5	protein_coding	-1.37478	0.257089	-5.3475	8.91782e-08	1.80081e-06
RADIL	protein_coding	-1.37516	0.177388	-7.75226	9.02737e-15	1.25681e-12
MUCL1	protein_coding	-1.37568	0.451071	-3.04982	0.00228979	0.00987884
CTRL	protein_coding	-1.37638	0.389222	-3.53624	0.000405863	0.00234511
SLCO4C1	protein_coding	-1.377	0.266196	-5.17288	2.30516e-07	4.07484e-06
DPT	protein_coding	-1.37781	0.227671	-6.05175	1.43279e-09	4.98239e-08
BEX5	protein_coding	-1.37802	0.212154	-6.49535	8.28409e-11	3.97501e-09
NDRG4	protein_coding	-1.37804	0.209754	-6.56981	5.03799e-11	2.55225e-09
PADI4	protein_coding	-1.37816	0.244891	-5.62765	1.82677e-08	4.60276e-07
SRSF12	protein_coding	-1.3795	0.150657	-9.15657	5.3574e-20	3.85601e-17
JAKMIP1	protein_coding	-1.38	0.190774	-7.23371	4.69962e-13	4.1213e-11
GPR18	protein_coding	-1.38124	0.24286	-5.6874	1.28988e-08	3.41746e-07
SCGB2A1	protein_coding	-1.38165	0.289097	-4.77918	1.76014e-06	2.34115e-05
CCDC184	protein_coding	-1.3824	0.203246	-6.80158	1.03476e-11	6.35636e-10
MMP26	protein_coding	-1.38334	0.543507	-2.54521	0.0109212	0.035556
NRXN3	protein_coding	-1.38378	0.21329	-6.4878	8.70975e-11	4.12734e-09
AMTN	protein_coding	-1.38389	0.417666	-3.31339	0.000921713	0.00466259
FGF12	protein_coding	-1.38423	0.199134	-6.95123	3.62108e-12	2.47551e-10
SDK1	protein_coding	-1.38492	0.179974	-7.69514	1.41341e-14	1.84019e-12
MYOCD	protein_coding	-1.38526	0.244881	-5.65687	1.54163e-08	3.96818e-07
NAP1L5	protein_coding	-1.38601	0.157888	-8.77845	1.6575e-18	5.80079e-16
LCN6	protein_coding	-1.38731	0.26298	-5.27532	1.32522e-07	2.53399e-06
LRFN2	protein_coding	-1.38749	0.312184	-4.44445	8.81178e-06	9.14177e-05
C15orf59	protein_coding	-1.38852	0.187985	-7.38629	1.50977e-13	1.51961e-11
RUNDC3B	protein_coding	-1.38874	0.180907	-7.67658	1.63396e-14	2.08464e-12
P2RX2	protein_coding	-1.38928	0.281406	-4.9369	7.93726e-07	1.18506e-05
ST6GALNAC5	protein_coding	-1.3898	0.233592	-5.9497	2.68629e-09	8.5466e-08
STC2	protein_coding	-1.3912	0.202896	-6.85671	7.04636e-12	4.53284e-10
AC026954.2	protein_coding	-1.39236	0.373226	-3.73059	0.000191031	0.00123912
KCTD4	protein_coding	-1.39283	0.346473	-4.02002	5.81922e-05	0.000457043
HGNC:24955	protein_coding	-1.39312	0.272424	-5.11381	3.15728e-07	5.32217e-06
CAND2	protein_coding	-1.39404	0.176521	-7.89729	2.8503e-15	4.34922e-13
LRRC9	protein_coding	-1.39548	0.329893	-4.23011	2.33577e-05	0.000210644
CTXND1	protein_coding	-1.39642	0.258612	-5.39967	6.6763e-08	1.40259e-06
KCNG3	protein_coding	-1.39836	0.242853	-5.75805	8.50923e-09	2.35935e-07
SIX3	protein_coding	-1.40017	0.369734	-3.78697	0.000152498	0.00102599
RIPOR2	protein_coding	-1.40272	0.216144	-6.48973	8.59908e-11	4.09014e-09
P2RY10	protein_coding	-1.40325	0.248097	-5.65607	1.54876e-08	3.98117e-07
PLIN4	protein_coding	-1.40357	0.334791	-4.19237	2.7605e-05	0.000243535
TMPRSS6	protein_coding	-1.40487	0.235721	-5.9599	2.52392e-09	8.11122e-08
AGT	protein_coding	-1.40522	0.229319	-6.12781	8.90959e-10	3.27824e-08
CIDEA	protein_coding	-1.40535	0.570563	-2.4631	0.0137741	0.0428793
RIMS4	protein_coding	-1.40552	0.257214	-5.46441	4.64454e-08	1.02857e-06
ASPDH	protein_coding	-1.40634	0.240226	-5.85425	4.79172e-09	1.42028e-07
CTNNA2	protein_coding	-1.40719	0.271341	-5.18607	2.14773e-07	3.83385e-06
ANGPTL7	protein_coding	-1.40739	0.356233	-3.95076	7.79021e-05	0.000580416
PRSS1	protein_coding	-1.40748	0.495722	-2.83925	0.00452193	0.0172653
MAFB	protein_coding	-1.40772	0.199881	-7.0428	1.8842e-12	1.39323e-10
TEKT2	protein_coding	-1.40794	0.268297	-5.24769	1.54021e-07	2.88294e-06
FXYD6	protein_coding	-1.4088	0.172039	-8.18886	2.6371e-16	4.95554e-14
C2orf66	protein_coding	-1.40881	0.237165	-5.9402	2.84672e-09	8.997e-08
DISP3	protein_coding	-1.40901	0.262675	-5.3641	8.13534e-08	1.66849e-06
OSTN	protein_coding	-1.40971	0.417377	-3.37755	0.000731339	0.00383852
C9orf135	protein_coding	-1.41016	0.302143	-4.6672	3.05337e-06	3.71418e-05
C1orf127	protein_coding	-1.41024	0.294446	-4.78946	1.67232e-06	2.2402e-05
GSG1	protein_coding	-1.41213	0.318353	-4.43573	9.17587e-06	9.43228e-05
A1CF	protein_coding	-1.4127	0.25621	-5.51385	3.51071e-08	8.05794e-07
TRIM50	protein_coding	-1.41291	0.367205	-3.84773	0.000119219	0.000835694
[truncated: 798 more rows]

## Sheet: Table 9
probes	moduleColor	GS.riskScore	MMbrown
[truncated: 247 more rows]
